# Supplementary material for: Stage-specific effects of Notch activation during skeletal myogenesis
Source: eLife. 2016 Sep 19;5:e17355. doi: 10.7554/eLife.17355 (PMC5070950; doi:10.7554/eLife.17355)
Supplement: Figure 5—source data 1. — DOI: http://dx.doi.org/10.7554/eLife.17355.013 [file elife-17355-fig5-data1.xlsx]

## Sheet: Result
ProbeName	Log FC ([N1ICD-mdx] vs [mdx])	FC ([N1ICD-mdx] vs [mdx])	Regulation ([N1ICD-mdx] vs [mdx])	GeneSymbol	Description	Sequence
(+)E1A_r60_n9	-3.28076	9.71869	down		Unknown
DCP_22_7	2.96433	7.80464	up		Unknown
DCP_22_6	2.94166	7.68293	up		Unknown
DCP_22_4	2.93649	7.65549	up		Unknown
DCP_22_0	2.89531	7.44004	up		Unknown
(+)E1A_r60_a22	2.89246	7.42535	up		Unknown
DCP_22_2	2.87687	7.34554	up		Unknown
A_52_P686760	2.63334	6.20462	up	Gdf11	Mus musculus growth differentiation factor 11 (Gdf11), mRNA [NM_010272]	TGTTCATGCAAAAGTATCCACACACCCACTTGGTGCAACAGGCCAACCCAAGAGGCTCTG
A_51_P279437	-2.49131	5.62287	down	Mfsd2a	Mus musculus major facilitator superfamily domain containing 2A (Mfsd2a), mRNA [NM_029662]	CTGACTGGGCCTAGCTCGGAACACTAATGTAGAAACGTTTTATACAGAGACTAATTAATA
A_55_P2006479	2.44823	5.45746	up	3300002I08Rik	Mus musculus RIKEN cDNA 3300002I08 gene (3300002I08Rik), mRNA [NM_027017]	GAAGACTAGGTGGGTAAGGATTTGGTGGTGACAAACAGAAATAAACACAGAGGCAATTTG
A_30_P01022312	-2.24957	4.7554	down		lincRNA:chr13:99465269-99472596 forward strand	TACAGACCCATAAAGGAACTGACCCAAGGACATTGCAGTTATCCGTGTCTTGGGTGGGGA
A_55_P2085142	-2.21521	4.6435	down	Spp1	Mus musculus secreted phosphoprotein 1 (Spp1), transcript variant 5, mRNA [NM_001204233]	AGGTGATAGCTTGGCTTATGGACTGAGGTCAAAGTCTAGGAGTTTCCAGGTTTCTGATGA
A_55_P2096134	-2.15896	4.46594	down			ATCACGAATGGGGAGTATGGGGGATCACAGATGGAGAGCATGGGGGATCACGGATGGGGA
A_55_P1964325	-2.15222	4.44511	down	Klrb1b	Mus musculus killer cell lectin-like receptor subfamily B member 1B (Klrb1b), mRNA [NM_030599]	TCTCCCAAAGGCAGGAACTTGACATTGACATAGGAGAGAGGAACCCAAAAGACATTTTTT
A_30_P01029199	2.1445	4.42139	up		lincRNA:chr6:66216675-66234475 reverse strand	TTGTGACAATCAGGAGATTAATAGTTTGTCGGATGATGTTGTCCTTGGGCCATGTGGCTG
A_30_P01030290	-2.1411	4.41098	down		lincRNA:chr19:46419916-46421753 forward strand	GAGAGTGGTGAGATGAAGGGGGGTATATTAACTAATTAAATCAACACTTAAGCATTACAA
A_55_P2025796	-2.13171	4.38237	down	Fanci	Fanconi anemia, complementation group I [Source:MGI Symbol;Acc:MGI:2384790] [ENSMUST00000118959]	AGGAGGGGGAAACTGGTCAGGATGTGCTGTATGAGAGAAGAATAAATTAAACAAAAAGTT
A_55_P2063283	-2.10084	4.28959	down		immunoglobulin heavy constant gamma 2B [Source:MGI Symbol;Acc:MGI:96445] [ENSMUST00000103418]	AGCAATGGGCATACAGAGGAGAACTACAAGGACACCGCACCAGTCCTGGACTCTGACGGT
A_30_P01026165	2.08755	4.25026	up		lincRNA:chr5:136371885-136372424 reverse strand	ATATGAAGTGAGGGAAAGTCAAGGTATGACCTTGGCTCTGTTTCTTGTTGACCCTAGGCA
A_55_P2170836	-2.03205	4.08986	down	Gm14149	PREDICTED: Mus musculus predicted gene 14149 (Gm14149), mRNA [XM_003084513]	CATCGTGGGTGTCATGAAATGTAAACAACAAGAGATAAAAAACAGATGGGGTGAGGGGAT
A_55_P2252586	2.00832	4.02315	up	3426406K10Rik	Mus musculus 10 days embryo whole body cDNA, RIKEN full-length enriched library, clone:3426406K10 product:hypothetical protein, full insert sequence. [AK132212]	TAGAGTTGTATCACTGCCTCTCAGTTTCCTTCTCCCTAATACTGCATTGGCCAGTTACTC
A_52_P150327	-1.99772	3.99369	down	Kif2a	Mus musculus kinesin family member 2A (Kif2a), transcript variant 1, mRNA [NM_008442]	ACGACCACTCAATAAAAAAGAAACTCAAATGAAAGATCTTGATGTGATCACAATCCCTAG
A_55_P2021330	-1.99421	3.98398	down			AATAAGGAACAGGAAACCTTTGCTTACAGAGGAGTCCAGACACAAACAGATAGAAGGGGC
A_55_P2048448	-1.99417	3.98387	down	Klra23	Mus musculus killer cell lectin-like receptor subfamily A, member 23 (Klra23), mRNA [NM_024470]	GATTTTCATATGACAATAAGAGAAAAGATTGGGTATGGATTGACAATGGCCCATCTAAAC
A_51_P104172	-1.96267	3.89783	down	Zfp128	Mus musculus zinc finger protein 128 (Zfp128), mRNA [NM_153802]	CTAAATTCCTAATGTCCACAAAGTACTATGTGTTTCTATGTGAATTCAAGTCAGAAACCC
A_30_P01027810	-1.94748	3.85699	down		lincRNA:chr17:71183978-71185384 forward strand	GACATTTCACTGCTATCCAGGATTTACAGAAAATGTTAGAAAAACTCTGCAGCAATGTTA
A_55_P2100475	-1.94313	3.8454	down	Gas2l3	Mus musculus growth arrest-specific 2 like 3 (Gas2l3), transcript variant 3, mRNA [NM_001284344]	AATTTAAGACCTGGCACACCAGTGAGTGTTCCGAAGAACAAGGAGAAACAGGTACGTCTA
A_51_P178772	1.94302	3.84509	up	Ces1f	Mus musculus carboxylesterase 1F (Ces1f), mRNA [NM_144930]	GTTCTTCCACTAACAGTGTATGTAAATCCAAGATGGATCTTGGAGGATCCTGAAGAACTT
A_30_P01030112	1.93864	3.83344	up		lincRNA:chr7:99879368-99889978 reverse strand	TGTAAGTGGTACTTAGTAACAGAGGTACTGATCTCTGATTCCTAGTGCCAACCTGTGGTG
A_55_P2145262	1.93738	3.83008	up	Pex5l	peroxisomal biogenesis factor 5-like [Source:MGI Symbol;Acc:MGI:1916672] [ENSMUST00000123218]	ACAGTCTGCTTTGTGTTTGTCTGTTTTCTTGTGTTGGTTTGGTTTGGGTTTTTGGTTGGT
A_55_P2128108	-1.93541	3.82487	down	5830411N06Rik	Mus musculus adult male thymus cDNA, RIKEN full-length enriched library, clone:5830411N06 product:inferred: antigen WC11 {Bos taurus}, full insert sequence. [AK030813]	TTGTGGAGGGGGCTCTGATTCCAACTCTCCCTTAGAGTTCCGACTGGTCAATGGCAGCAG
A_30_P01020355	-1.93368	3.82029	down		lincRNA:chr15:5969454-5994540 forward strand	TGAACAATAGAGTATTTGGGGGAGGGCTAAGTTAATAAAAGGCATCTGTATATTTGCAAT
A_55_P2213968	-1.90702	3.75034	down	4933416M07Rik	Mus musculus RIKEN cDNA 4933416M07 gene (4933416M07Rik), long non-coding RNA [NR_045840]	TGGGAGGAAAGGAGGGAGGGGGAACCATGATCAAATACATTACATGAAAAAACATTATTC
A_55_P2219731	-1.89923	3.73014	down	AI413759	UI-M-BH3-brr-a-10-0-UI.s1 NIH_BMAP_M_S4 Mus musculus cDNA clone UI-M-BH3-brr-a-10-0-UI 3', mRNA sequence [BI134269]	AGTTTCTACCATCCTGTAATCCTGCTGGGATGAGTCAAGTCACAGGCTGGGGTGGGGGAG
A_55_P1982131	1.89458	3.71813	up	Grip1	Mus musculus glutamate receptor interacting protein 1 (Grip1), transcript variant 1, mRNA [NM_028736]	GGATATGTCTTGTGACCTGTTTTGTTTTTGTTTTGTTCTCCTTCCCCTTAAGGACACATT
A_52_P468343	1.88361	3.68998	up	Bdh1	Mus musculus 3-hydroxybutyrate dehydrogenase, type 1 (Bdh1), transcript variant 2, mRNA [NM_001122683]	TGGTCACCTCTTCTTTGTATTGGGAACTTCTTTTTAATTAAACTGAGACACAGTTAGAGA
A_52_P100341	-1.86769	3.64949	down	Zfp334	Mus musculus zinc finger protein 334 (Zfp334), mRNA [NM_178411]	CTTGAAGACACGTAAAAAATCTAAAGCAACTAAATGGAAGAGAATCCTTAAAAGCAGCTG
A_55_P2109927	1.86388	3.63985	up	Myo19	myosin XIX [Source:MGI Symbol;Acc:MGI:1913446] [ENSMUST00000020837]	AAGGGTGTTGTTTTGGTTTGTTTGGGATTTTGTGAGTTTTTGGTTTGTTGTCTTCCCCCC
A_30_P01024501	-1.86015	3.63046	down		lincRNA:chr18:38738876-38739324 reverse strand	AACCAAAGTCATTCTCACTGATAAAACATTCTCTTATTTTCAAATTTGGGGGCTGGGGGC
A_30_P01022033	1.85485	3.61714	up		lincRNA:chr7:99879368-99889978 reverse strand	ATACTACCTTGTTGATCCTAAGCATATAGGATACAGGGCTTTCTATGGTTATTTCCCTTC
A_55_P2080880	1.8506	3.60651	up	Clcnkb	Mus musculus chloride channel Kb (Clcnkb), mRNA [NM_019701]	TGACTTCTGGGGTTGCCTGCTGCTAACCAGGAGCTTCTGAGAAAAATAAAACTGATGTCT
A_55_P2097434	-1.84039	3.58106	down	Strm	Mus musculus striamin protein (Strn2) mRNA, complete cds. [AF031663]	AACGCTTTCTCACTCGGGAACTACTACTGCTGTCCGTGGAGGGGGACAAGATGGGCCAAA
A_52_P644264	-1.83979	3.57958	down	Capn12	Mus musculus calpain 12 (Capn12), mRNA [NM_001110807]	GTGGTTTATCCAGAAACCAAGAAAATAAAAATCAATCAGAATAAACTCAAGGGGGCGAGT
A_55_P2093679	-1.83938	3.57855	down	Zfp599	Mus musculus zinc finger protein 599 (Zfp599), mRNA [NM_181419]	CACGTGTGGTCCACAGATATCCATGCTGGTAAAATACTCATAACACATGAAATAAAAATA
A_51_P285736	-1.833	3.56278	down	Pdcd1	Mus musculus programmed cell death 1 (Pdcd1), mRNA [NM_008798]	AAGGAAAGGGGGATATAACCTTGACGCAAACCAACACTGGGGTGTTAGAATCTCCTCATT
A_55_P2033278	1.83122	3.55838	up	Speer5-ps1	Mus musculus spermatogenesis associated glutamate (E)-rich protein 5, pseudogene 1 (Speer5-ps1), transcript variant 1, non-coding RNA [NR_001582]	ATGGCTGATTCAGGGTGTTGTTCCCTTTTCTCTTCAGACAACTCCTCTTGACAGAGAACT
A_51_P163106	1.82776	3.54984	up	Bdh1	Mus musculus 3-hydroxybutyrate dehydrogenase, type 1 (Bdh1), transcript variant 1, mRNA [NM_175177]	TGGGTGGCCCTAAACCTCAGGGCCAATATGGTGCTTCTATCTATCTCGAGTTGATTTTAT
A_30_P01023947	1.81847	3.52707	up		lincRNA:chr4:40194362-40202712 reverse strand	AAGTGTATCTAGGATCCCCATTTCCCCCTGGAAGTGACTTTGGTTTTTGAATGTCAGTGG
A_55_P2225246	1.80118	3.48506	up	4831440D22Rik	PREDICTED: Mus musculus RIKEN cDNA 4831440D22 gene (4831440D22Rik), misc_RNA [XR_108025]	CCGAAAACCCCTGTTTCACCATGTTGCTTGGGTGTAAAAGATTAATTTTATACTCATTTT
A_55_P2250192	-1.79017	3.45855	down		O41021_PBCV1 (O41021) A312aR protein, partial (27%) [TC1670673]	CTCTCCAGAGCTCTGAGAGCTAAATAAACAAACAAACAAACACACATGAATTGTTACAAA
A_30_P01031761	-1.7697	3.40984	down		lincRNA:chr7:96640618-96649018 reverse strand	CCCAACCCCTACACCATTGCACATAATGATAATGAATAAAGTCTAAAAATAGTTGTTAAA
A_30_P01023101	1.76524	3.39932	up		lincRNA:chr17:27703181-27716306 reverse strand	TTTGATTGTTGTCACTAAGTCAGTCTAGTGAAGTGCACCAAGTCCCTTTCAGTGGCCTTG
A_55_P2185362	-1.75756	3.38126	down			GGAGAGTGGTTGGGGGGAAATTGTACACTGAAAGAGTTCAGCTTTTAAAAAATAATTATT
A_30_P01028730	1.75479	3.37477	up		lincRNA:chr1:42689799-42749799 forward strand	ACGTTTGCTGCTAATGAATCATATTTTCACCATCGCCTCCAGTCTATCAGGTGGACTCTG
A_55_P2004037	1.75116	3.36628	up	3110040M04Rik	PREDICTED: Mus musculus RIKEN cDNA 3110040M04 gene (3110040M04Rik), mRNA [XM_993996]	GTCTTGGTCACATCCTGACTTGTAATGCTTCATCGTGGTTTTCACTATTTTAATAAAGAT
A_55_P2044684	1.74723	3.35714	up	Rsph1	Mus musculus radial spoke head 1 homolog (Chlamydomonas) (Rsph1), mRNA [NM_025290]	CTCTTAGCTGTTAAGTTGTTTTTTCGGTTAACAAAATAAATCTCCAGGTGTTCAGTGTTG
A_30_P01018475	-1.74642	3.35524	down		lincRNA:chrX:50400250-50410825 forward strand	TTTTGAGAATTATCCCCGTATCTGTTACAGTCTGTAGTGACCAGAGACATAGTTGGGGGC
A_52_P619192	1.7449	3.35171	up	Rundc3b	Mus musculus RUN domain containing 3B (Rundc3b), mRNA [NM_198620]	GGTACACTTTTTCAGATCTGTCCGATAGAAGCACTAGTTTGTGACATATCCCTGCTGCGA
A_66_P120987	-1.74178	3.34447	down	Cd79a	Mus musculus CD79A antigen (immunoglobulin-associated alpha) (Cd79a), mRNA [NM_007655]	TAGAAAACAACATATTAAAACGCTCCTGTGGTACTTACCTCCGCGTGCGCAATCCAGTCC
A_30_P01019670	1.73669	3.3327	up		lincRNA:chr12:110003268-110030953 reverse strand	GAGCTAGACAGGAAAAAGTGGAGTACTTTTTTAGTTGTAGAAGCTAGAGGTCTTTGTCTT
(+)E1A_r60_a107	-1.73474	3.3282	down		Unknown
A_30_P01026367	-1.73379	3.32601	down		lincRNA:chr6:134838675-134847075 reverse strand	TAGATTTTTAAGGAGAGAAGCAAGGGGGGATGGGAGGACTTCCTGTCTTAGTGTAATTGT
A_55_P2365902	-1.72688	3.31011	down	C130033p17rik	Mus musculus 16 days embryo head cDNA, RIKEN full-length enriched library, clone:C130033P17 product:unclassifiable, full insert sequence. [AK048087]	TTCTGTTCAAGAAGAGGGAGGAGGGGAGCCACAAAATACCATTCATCCAAACACCTGAAA
A_30_P01033254	-1.72335	3.30202	down		lincRNA:chr1:88187397-88187862 reverse strand	ATATACACAGAGTTAAAAATAAATCTGAAAATGAATCGGAGGGGAGAGGTAGAAGACTAT
A_55_P2101055	1.71905	3.2922	up	Alpk1	Mus musculus alpha-kinase 1 (Alpk1), mRNA [NM_027808]	GAAATATGCCATCGTCTTTCTCTGACTAGACCTTCACTAGAGCAAACAAGTAAGGTATAG
A_30_P01031675	-1.71851	3.29095	down		lincRNA:chr8:82836971-82849309 reverse strand	GAAACTCTACTGAAAACAGATGAGTGTTAAGAAATAAATTTGGAACAACCCCTTTCGTCA
A_52_P354202	-1.71545	3.284	down	Eri2	Mus musculus exoribonuclease 2 (Eri2), mRNA [NM_027698]	GGGAATAGAATTTTCAGGACGAGAACATTCTGGCTTAGATGATTCTCGGAACACTGCTCT
A_30_P01031614	1.71055	3.27285	up		lincRNA:chr3:30077338-30080281 reverse strand	GGAATTGCTCTGATGAGGTCTCTGAGTTAATTTTTTAAGTGAATATTTCGTCATAAGCCA
A_55_P2202357	-1.70891	3.26914	down	0710001A04Rik	Mus musculus adult male brain cDNA, RIKEN full-length enriched library, clone:0710001A04 product:unclassifiable, full insert sequence. [AK002931]	GGTGGGGGTGTAAATGTCATGCAGAATTCATATAGCTTAAATCTATTGGAATAAATTCAC
A_30_P01023301	-1.70759	3.26614	down		lincRNA:chr4:146889506-146890173 forward strand	CTAATAAAACTGGTAACATTCTGTATATTTAATTAAAATGAACCAATTAAGATAAAAATA
A_30_P01018453	-1.70631	3.26325	down		lincRNA:chr9:100977450-100989325 reverse strand	ACCAAAATCCGTGCAAGTTTGTGAAGCTGAAGCAATCCTCCCACACATGGGGGCCTCGGC
A_30_P01030360	1.7054	3.2612	up		lincRNA:chr11:33414450-33450750 forward strand	TGGACTGCAGCATCTTCTAGCTCTTTTCTTCTGTGCTCATTTCTCTGTTTCCCCATTTTC
A_55_P1955627	1.70142	3.2522	up	Chrdl1	Mus musculus chordin-like 1 (Chrdl1), transcript variant 1, mRNA [NM_001114385]	CACAGGACATGTACCCAAATATGGTACTTATTTATGTAGTCACTGTGTTTCTGGAATTTT
A_66_P134297	-1.69864	3.24595	down	Olfr978	Mus musculus olfactory receptor 978 (Olfr978), mRNA [NM_147105]	GAAGTGAAGAAAGCACTGTTGAAAATAAAATATGGGTCTGTGCTTCCTCAGGATAAATAA
A_55_P2004867	-1.69784	3.24415	down	Serpinb2	Mus musculus serine (or cysteine) peptidase inhibitor, clade B, member 2 (Serpinb2), transcript variant 1, mRNA [NM_011111]	CATCATAAGTAAGCATGCTTACTTACACACTGCTATCTGTTGTATAAAACTTAGCAATCC
A_51_P110381	1.69718	3.24268	up	Cd207	Mus musculus CD207 antigen (Cd207), mRNA [NM_144943]	CCTTGGAGGAGCTTGGGTTAAACGGGTGAGGACCTGAAAAGGGTGTAGCAGTCCTTACTG
A_55_P2098791	-1.69233	3.23178	down			TTACTAGCCAATCAGACGCAAAATGGCAGTTTAGGGGTGTGGCTAAAGGGGGCGGGGAGA
A_30_P01030302	1.68964	3.22576	up		lincRNA:chr4:98943050-98959998 forward strand	TAAGTGAGACTTTGCTCTTCGCGTCAACCTCCCGGAGTCTCTGTGTGTAGACTAAGCGCA
A_30_P01022294	1.68475	3.21485	up		lincRNA:chr16:3872469-3877048 forward strand	TGCTTAACTTAGTCTACCTGTGTTGGACCTGACTCTGAAGTGGTATGATCTACGGTGATC
A_30_P01022023	1.67772	3.19921	up		lincRNA:chr5:111602486-111603075 forward strand	AGGATGCAGATCCCGGTGCATCCTGGATGTTTGTTGAGCGACTGCTGTTGTGTCAGTCAT
A_55_P2112370	1.67543	3.19414	up		predicted gene 10447 [Source:MGI Symbol;Acc:MGI:3642647] [ENSMUST00000084653]	GTGTGTGGTGTATGCATGTGTACCTCTCGAGATTGGGTCTTTTCTTTTCTTTTTCTTTTT
A_55_P2119687	-1.67157	3.18562	down		mb59e12.r1 Soares mouse p3NMF19.5 Mus musculus cDNA clone IMAGE:333742 5'. [W17435]	GTACGCCTACACTCCCATTCATGTGCACACATATATACACACATACATATAATTTAAACA
A_66_P135885	1.66137	3.16317	up	Olfr671	Mus musculus olfactory receptor 671 (Olfr671), mRNA [NM_001011755]	GTTCTTCCACTGGTGTTTCTCCTACTGAGGCTACCCTACTGTGGCCATCAAAGCATTCCT
A_55_P1957043	1.65998	3.16013	up	Speer8-ps1	Mus musculus spermatogenesis associated glutamate (E)-rich protein 8, pseudogene 1 (Speer8-ps1), non-coding RNA [NR_001584]	GTCTCATTCTGTCCCCATGTAACACCCACAATACCCAGTGCAAGTAAATACTTGAAGTTC
A_55_P2201612	1.65952	3.15912	up	Slc30a7	Mus musculus solute carrier family 30 (zinc transporter), member 7 (Slc30a7), mRNA [NM_023214]	AATAAGCTCTCTGACAGTGATACTGTGTGTCATCGGGATCTGTTCCAAAGCCTTAGTCAG
A_30_P01033215	1.65894	3.15785	up		lincRNA:chr9:41300137-41301556 forward strand	GCTGGTTGTCAGTTATGTATGTATGAAACTATGTTGAGTATTTCTGCATTAAAAGTGCAG
A_55_P2072120	1.65219	3.1431	up	AW011738	Mus musculus expressed sequence AW011738 (AW011738), long non-coding RNA [NR_030671]	TATGATTTCCTTGTGTGAGATGTGAAGCCCGTAGAGTATCTTGTGAGTGGTCTGGAAGCT
A_30_P01022430	1.64839	3.13484	up		lincRNA:chr13:34186976-34210579 forward strand	TATTTCCCCTGGTATTTTCCTTGCTTGTATGGGCTTGTGTCTGCTTTTCTGGCTAGGTTG
A_52_P8251	1.64759	3.1331	up		predicted gene 10306 [Source:MGI Symbol;Acc:MGI:3704234] [ENSMUST00000094969]	GTCTCCAATTTCTTCTACCTTCGATTCCCTCGTTTGATTCAACGATATAACAATAAAAAG
A_51_P461040	-1.64756	3.13302	down	Crct1	Mus musculus cysteine-rich C-terminal 1 (Crct1), mRNA [NM_028798]	GATACAAGTCAGGGGTGGGACTTCAGATCACGCTATGGGCAGGAGGTTGTGCACAGCAGT
A_55_P2162825	-1.64742	3.13274	down	Smco3	Mus musculus single-pass membrane protein with coiled-coil domains 3 (Smco3), mRNA [NM_001039558]	GTGTGGAACATTGTAAACAAAACAAGGCATAAAATGCAGTGATCCCTGCATAAAATATGT
A_55_P2136606	-1.64581	3.12923	down	Crnn	Mus musculus cornulin (Crnn), mRNA [NM_001081200]	GAGAAGAAAGGAATCACAGCCAAGGGACTATATACCTACTTGAAGACAGAGCAGCCATGA
A_66_P126745	1.64496	3.12739	up	Gm4792	Mus musculus predicted gene 4792 (Gm4792), long non-coding RNA [NR_033209]	TCGTCTTTCTCTTGCCCTACAGATCTCGTCCATTCGTCTGCTTTTAGAGATAGCAAACCT
A_55_P2087958	-1.64431	3.12599	down	Lpcat4	Mus musculus lysophosphatidylcholine acyltransferase 4 (Lpcat4), mRNA [NM_207206]	TGGGGTCTTTTTGTAAAAGACTATTTTATATATAAATATAAATATATATCTAATAAAAAA
A_66_P102346	-1.63402	3.10377	down		Mus musculus monoclonal antibody FG1 to cardiolipin, Ig light chain variable region mRNA, partial cds. [U41438]	CATCTCTTGCAGATCTAGTCAGAGCCTTGTACACAGTAATGGAAACACCTATTTACATTG
A_55_P1982499	1.63037	3.09592	up	Gldn	Mus musculus gliomedin (Gldn), mRNA [NM_177350]	CCATCAGTAACCACAGATTCTAAACGACCAGCAAGTAACAGTTGTAAGTAGTAAAATAAA
A_51_P515532	-1.62862	3.09217	down	Tmem200a	Mus musculus transmembrane protein 200A (Tmem200a), mRNA [NM_029881]	GAGAGGCACCCTGCTTCGTAGAAGCTCAAGCCTGTGTGTTATAATAGACTAAGCTCAATA
A_55_P1961608	-1.6272	3.08913	down	Ypel4	Mus musculus yippee-like 4 (Drosophila) (Ypel4), mRNA [NM_001005342]	AAGAAGGGAAGTACATCATTGAGATGTCACACATGGTGAAAGACAACGGCTGGGATTGAG
A_30_P01026936	-1.62379	3.08183	down		lincRNA:chr12:16873410-16873872 forward strand	AATAATAAAGAGGGAGAGGGTGGGGGACATTTCAACACATGACACATCAAACACCTGACC
A_55_P2150138	-1.61451	3.06208	down		RIKEN cDNA 5730522E02 gene [Source:MGI Symbol;Acc:MGI:1917876] [ENSMUST00000125987]	ACAGCTAGCCGCAGCAGAGCCGAACAGACCGAGAGGGAAAGACAGACAAATCGGCGCGAG
A_55_P2137010	1.61163	3.05597	up	Chrna7	Mus musculus adult male diencephalon cDNA, RIKEN full-length enriched library, clone:9330163M16 product:cholinergic receptor, nicotinic, alpha polypeptide 7, full insert sequence. [AK034208]	CATGTTTCTCCTTTCTGGATGCACCTCAGAATTGTTTGCTATGCCTTGCTGTTCACTTGA
(+)E1A_r60_a135	-1.60649	3.0451	down		Unknown
A_30_P01030811	1.60338	3.03855	up		lincRNA:chr2:174917150-174935618 reverse strand	GTGGAGGTCCAACCTAACTTTACTCATATTTTGTTCTTGAAAACATAATGACTGTCTCTA
A_30_P01026474	1.60335	3.03847	up		lincRNA:chr5:77239012-77271614 forward strand	TTCTTTGAAGGGTGGATACTGGCCTGTTGCCTTCAGTGATACCTGCTCTGTAACATTTAC
A_51_P436521	1.60278	3.03728	up	Tmc2	Mus musculus transmembrane channel-like gene family 2 (Tmc2), mRNA [NM_138655]	ATCTCTTCCCTTCTCATCTCACATATACAAATGTTTCCCTATGGCTTATGTAACATATGA
A_30_P01022529	1.60117	3.03389	up		lincRNA:chr2:108456668-108532418 reverse strand	AGAGCTGCTGCTTCTCTCTGGTCAGGTCTCTGCTTTGTAACAGGGTGACTTTGGGACTGT
A_55_P1969962	1.60109	3.03372	up	Catsper3	Mus musculus cation channel, sperm associated 3 (Catsper3), transcript variant 1, mRNA [NM_001252487]	ATCTGTCTATGTCTGCGAGTTCCTCATGAAGGTCTATGTGGACCCCATTACATACTGGAA
A_30_P01018514	1.59981	3.03104	up		lincRNA:chr4:8865575-8899400 forward strand	GAAGACCTGCGCAGCTCTGTTCTAGTGAAGATGTTGGCACGTTCATCTGACTGGCGCTCT
A_30_P01028470	-1.59041	3.01135	down		lincRNA:chr9:75316023-75344401 reverse strand	TGAGTGTCCCTAACTAAAGCAAAATGAAAGAGGGGGTGCATTCTACGGTCATAAGGAAAT
A_30_P01021035	-1.59007	3.01065	down		lincRNA:chr5:33174092-33200792 forward strand	TAATAAAAACACAAAAACCAAAGCTCCCTTGGTGGACATGACTGGGGGAAGGGGAGAAAA
A_30_P01018982	1.58367	2.99731	up		lincRNA:chr4:8865575-8899400 forward strand	TTGTGGGGAGGACAGTGGAAGATGTTGGGTGTATCGCTGTATCACTTATTCCTTTGAGAT
A_30_P01023971	1.5815	2.9928	up		lincRNA:chr13:94182877-94203852 reverse strand	GGGACTCTGTGTGTGTGAACTGTTCTGTCAAAGAGTTTTTGTTTTTGTCTTTTTAATGTA
A_51_P358574	1.58054	2.99081	up	Pdzd3	Mus musculus PDZ domain containing 3 (Pdzd3), mRNA [NM_133226]	TGTCATCTGGCAGAAGGATTGATTGGAGGTGTATCTTCCTTCTACTGTGGATACCTTAGA
A_55_P2057189	-1.57981	2.9893	down	Mptx1	PREDICTED: Mus musculus RIKEN cDNA 1810030J14 gene (1810030J14Rik), mRNA [XM_003689333]	TGAATAAGGGATACACGGTGGGGGGTGATGCAATGATCATTATAGGACAAGAGCAGGATT
A_30_P01029190	1.57531	2.98	up		lincRNA:chr8:41475940-41476460 forward strand	TTTCTCTGCTTCTGATACTCACATTGCTGGCCAGAAAGTTAACATGTGCGGTTTTGCTCC
A_55_P2164779	-1.57417	2.97764	down		Q9Z9I3_STRFR (Q9Z9I3) Regulator protein, partial (6%) [TC1637029]	TCATGCCCCAAAGAAAATGAAAAACACTGCTGAACAATGGAACTATGTGCATGGCCAGCG
A_55_P2026715	-1.57358	2.97643	down	Hspbap1	Mus musculus Hspb associated protein 1 (Hspbap1), mRNA [NM_175111]	ACCATCACTAAAAAAGGGGAGGGGGCTATATATAGTTTTTAAATAAATGTGTGACAATGC
A_51_P241413	1.56624	2.96132	up		RIKEN cDNA 0610025J13 gene [Source:MGI Symbol;Acc:MGI:1915618] [ENSMUST00000131324]	TTCAGATATATTTATGTTTGTCAGACATTTTGTTGGTGGCTAGTAAAGTCTACAATAACT
A_30_P01031090	-1.5598	2.94813	down		lincRNA:chr17:84359207-84360270 reverse strand	ACTACAGAAAGAAGAATGCCTTTCCTGATCTCCAAACAAAAGAGAACACCTGAACCCTCA
A_30_P01031095	1.5579	2.94425	up		lincRNA:chr18:82862340-82875566 forward strand	TTTTCACACACAGTTTCCAGTCTCACACTTGTGTAAGATACCTGCTGATCTATTTTTACG
A_55_P2146655	1.55761	2.94365	up			AGCAGTGGCTGTGGCAGTGCCTATTGCAGTGGCTGTGGCTATAGCAGTGTTTGTGGCAGT
A_30_P01027735	-1.55201	2.93226	down		lincRNA:chr7:80766878-80767496 reverse strand	AATACAGTCAAGATGGTAAGGACTCATATTTCTGAAGTCTCTAGGGGAGGATGGGTGCTG
A_51_P109570	-1.55147	2.93116	down	Klrb1b	Mus musculus killer cell lectin-like receptor subfamily B member 1B (Klrb1b), mRNA [NM_030599]	CACATGGACTCTGAAAACACTGGGATTCTTAAAGGTTCTTCATTGTATAAATGGAAGTGT
A_30_P01033524	1.5506	2.92939	up		lincRNA:chr8:49862898-49863497 reverse strand	GCGGAGTTGTTGACGTGATATTTCTCCCTTTCTTCCTTTCTCATTCCTTATGTGTCATCA
A_30_P01023531	1.55016	2.92849	up		lincRNA:chr8:48476637-48492537 reverse strand	ATTCAATGTGGGAGCGAACACAGGATCTTTTTCAGTCCACTCTTGTGACACTGTAGGTTG
A_30_P01021574	1.54871	2.92556	up		lincRNA:chr9:63774461-63784928 reverse strand	TTCTGTGTCTCCCTGACTAGAAGTCATGGGCGGAGTCACCTTTCCTTACTCTGTGGTGAT
A_55_P2012096	1.54588	2.91982	up	Bmp8a	Mus musculus bone morphogenetic protein 8a (Bmp8a), transcript variant 1, mRNA [NM_001256019]	TAAAGAGACAGAGACAGGAGAATCTCTGTGAGTTCAAGGCCACATAGAAAGAGCCTGTCT
A_51_P449614	1.54561	2.91928	up	1700006A11Rik	Mus musculus RIKEN cDNA 1700006A11 gene (1700006A11Rik), mRNA [NM_027939]	ACTTGAATCCCCAGGACTACATTGAATTCCATTTCTCCTTCACTTTATTGATTATTCCAC
A_55_P2054832	1.54381	2.91564	up	Rxfp3	Mus musculus relaxin family peptide receptor 3 (Rxfp3), mRNA [NM_178717]	TTAATGCTGCTGCCGAACCTGACCTGATCTACTATCCACCCGGTGTGGTGGTCTACAGCG
A_55_P2108221	-1.54352	2.91504	down			GAGAAAAGAGGAGGAGAAGCAGAAGAGGAAAATAGAAGAAGCAAACACACCCAAGAGTAG
A_55_P2277715	-1.54103	2.91001	down	Nudt5	nudix (nucleoside diphosphate linked moiety X)-type motif 5 [Source:MGI Symbol;Acc:MGI:1858232] [ENSMUST00000026927]	CTCTGTAGAAATACAGTGAACCTACAGAAATACTCTTAGAGAACACTTAATAGGAATCTC
A_30_P01025347	-1.54034	2.90863	down		lincRNA:chr8:108153471-108159672 forward strand	CCCGGGAAAGGGAAGGGATTAAGTACCACCGACTGGGAACCGAAATAAAAAGAACAGTCT
A_55_P2114354	-1.5357	2.89928	down	Tbc1d31	Mus musculus TBC1 domain family, member 31 (Tbc1d31), transcript variant 1, mRNA [NM_001081396]	AAAGTTCATTGTGGACTACCAGACACGGGAATGGGAAAGGATAAGGAACGATGAACTGGA
A_55_P1986356	1.53535	2.89859	up	Tbc1d32	Mus musculus ES cells cDNA, RIKEN full-length enriched library, clone:C330006K03 product:hypothetical protein, full insert sequence. [AK141206]	AAGATACTCTGTATATACCTCTTAGGTTCATTTGCTCTGTGGCATTTCTTTGTTTGTTTG
A_55_P2096817	-1.53226	2.89239	down			AATCAAAGGATCCTTCTGTGGGCCAGTTGGTAAAGTGGGCCTTTCAGACATGCAGAATAT
A_30_P01028621	-1.53208	2.89202	down		lincRNA:chr4:140609589-140614789 reverse strand	TAATTTCTAGTCAACGACTAGAGAAAATGGGGAGGGGGATAAGTGGTGGGAAAAACTGGT
A_55_P2083252	1.53194	2.89175	up	Mtus2	Mus musculus microtubule associated tumor suppressor candidate 2 (Mtus2), mRNA [NM_029920]	TGTGCAAGACCATCCTGGTATTGGCGCTTAGGAAGGTGTAAGCAGCAGAGTCTGGTGTCC
A_30_P01018208	1.53087	2.8896	up		lincRNA:chr4:128727332-128735227 forward strand	TCTTTGGAATTTTCCTTTCCTCCCCTGACAGGTTTGTCCACTCTTACTCACTGAGAGCTT
A_55_P2201733	-1.52999	2.88784	down	4930571K23Rik	Mus musculus RIKEN cDNA 4930571K23 gene (4930571K23Rik), mRNA [NM_001145759]	TCCACTGGGCACCAGAAGGAAAGTGGAGGGGGCACCAAGCACAATAAATGGTATCTGGAG
A_30_P01032097	1.52822	2.8843	up		lincRNA:chr9:113676535-113677163 forward strand	GGCAGGAATGGTTTCATGTTTTTGAGGAGCTAAGAGCCAAGATAGTGGCTTATTTGTTTG
A_55_P1980671	1.52149	2.87087	up	Olfr324	Mus musculus olfactory receptor 324 (Olfr324), mRNA [NM_001011743]	TTGTTGATTATCTTTTCTGCGAGCTGCCTATCCTTCTGCACCTGTTCTGTGCAGATACGT
A_30_P01021408	-1.52069	2.86928	down		lincRNA:chr13:114514159-114514765 reverse strand	CCATGGCATCCTCAGTCACATGAAAACAGAAGTCTATGTGTGAATCTCAAATCTATAACA
A_55_P2322382	1.51996	2.86782	up	A930009E08Rik	Mus musculus adult retina cDNA, RIKEN full-length enriched library, clone:A930009E08 product:unclassifiable, full insert sequence. [AK020836]	TGTTTTATGGACATCTGTAATTCCTGTCTGTGTACGTCTGGGCTGTAAGGAACCACTTGC
A_52_P213889	1.51821	2.86435	up	Tmc7	Mus musculus transmembrane channel-like gene family 7 (Tmc7), mRNA [NM_172476]	ACTGCAGTTAGAGGAAGTAGCATTTTGACATCGATGGATGTGTTAGATGAGTCTTGTCTC
A_55_P2116332	-1.51497	2.85792	down	Gfm1	Mus musculus 15 days embryo male testis cDNA, RIKEN full-length enriched library, clone:8030465C11 product:G elongation factor, full insert sequence. [AK033214]	TTCACTTCAGGTTAGCCTGGCAGAAAACTAGTTTCTTAAAATAATAACAATTCTTCTTTC
A_55_P2017160	1.5145	2.857	up	Cdc14a	Mus musculus CDC14 cell division cycle 14A (Cdc14a), transcript variant 2, mRNA [NM_001173553]	CACCAGGAAGGGGATGTATATATTATAGAGATTATATAGCACAGAGATTCTCCACTTATA
A_30_P01019756	-1.51073	2.84955	down		lincRNA:chr12:88216447-88224965 forward strand	TACGGGAGGACTAGCTGGCTGGGGAAGAAGTCCAGCTGCGGGGGAGGGGGGCGGAGGGGA
A_30_P01018946	1.50677	2.84173	up		lincRNA:chr3:41327493-41328368 forward strand	AGTCTTGGGTCAAGCTAATTCTTGTCTTCGTTTACTCTTTTCCCCCAGACCTTCAGTCCA
A_55_P1998882	1.50562	2.83947	up	Gm7538	Mus musculus predicted gene 7538 (Gm7538), long non-coding RNA [NR_046033]	GATTAATAATGTGTTTTAAGTTCTTAGTGGAGTGCTGAATAAATGGCTGGACTGTCTTAC
A_55_P2094494	1.50208	2.83252	up	Tmem150b	Mus musculus transmembrane protein 150B (Tmem150b), transcript variant 1, mRNA [NM_001142792]	TAGTGGCCATGTTGCTCTTTATGCTATTTGGCTTCTTTGCCGTGGACTTCTCCATTTTGC
A_55_P2143641	1.49654	2.82165	up		Mus musculus 0 day neonate thymus cDNA, RIKEN full-length enriched library, clone:A430106F04 product:hypothetical protein, full insert sequence. [AK163054]	GAACCTGGGTTAAACCACCTCTCCCCAGTGACTCTCGTTCATTTCAAGGAGAGGCACTAA
A_51_P230324	-1.49561	2.81983	down	Efcab3	Mus musculus EF-hand calcium binding domain 3 (Efcab3), mRNA [NM_001081046]	AATAAAAGAGATTGGAAAACACAGGCCATGAATGTGAAACCTCTCAAGTCTGCCTCAGGC
A_55_P1996639	1.49449	2.81765	up			ACTGCAGCCCCAGTGTCTTGGTGCTGCACCAATATGCTGGAGTCATTCCAGTGTAGTCAC
A_52_P586944	1.49436	2.81738	up	Bmpr1b	Mus musculus bone morphogenetic protein receptor, type 1B (Bmpr1b), transcript variant 1, mRNA [NM_007560]	ATTTATGGAAGCATGTACATTGTGAACTCCCAAATGAAAAGCAGTTAAACAGTGTGTATG
A_51_P286436	1.49196	2.81271	up	Olfr434	Mus musculus olfactory receptor 434 (Olfr434), mRNA [NM_146369]	ACCTTTCTCTTCTTGGCTTTTGCCCACACTGAATGTGTGCTCCTTGTTGTGATGTCCTAT
A_55_P2025870	1.48964	2.8082	up	Ccdc169	Mus musculus coiled-coil domain containing 169 (Ccdc169), mRNA [NM_177203]	CACCTGAGGGGTTTATGTGTATGTATGTATGTGTGTATGTATGTATGTATGTATGTATGT
A_52_P357445	-1.48877	2.8065	down	Fgd4	Mus musculus FYVE, RhoGEF and PH domain containing 4 (Fgd4), transcript variant beta, mRNA [NM_139233]	GGATATTGTAAATCCCTCAAATGAACTAATAAAAGAAGGACAAATCCTCAAACTAGCAGC
A_55_P2022332	1.48633	2.80175	up			CAGATGACAACAGGGAAAGCAGTTGTGCTCTGGTCCTGTCTGCAAAATGACATGATATGA
A_55_P2064721	-1.48521	2.79957	down	4921534A09Rik	Mus musculus 13 days embryo heart cDNA, RIKEN full-length enriched library, clone:D330040M08 product:unclassifiable, full insert sequence. [AK084767]	ACGTGCACCTGCACTCTTAACCACATTATACAAAATAATAACTAAAAGAAAATTGGGACC
A_55_P1992495	1.48509	2.79935	up	Gpc4	M.musculus mRNA for K-glypican. [X83577]	TGCCTTATTGGGAGAGAAGTGGAGTTGACTTTGGGTTTTCTTCCTTTCTTTCTTTCTCTC
A_30_P01020791	1.48365	2.79656	up		lincRNA:chrX:100676170-100710920 forward strand	TTTTTTCTCCTGTGTGATAGGGTCTTATGTAGTCCAGAATGGCTCTTGCTGCCATCACCT
A_55_P2389518	-1.48159	2.79256	down	5430437J10Rik	Mus musculus RIKEN cDNA 5430437J10 gene, mRNA (cDNA clone IMAGE:5356629), with apparent retained intron. [BC023070]	ATCCTTTATGAATTGTAGCATGGAGGATAGGTGGTCTTGTCATCATCCCAGGAGAAGGAA
A_51_P136680	1.48152	2.79243	up	Krtap31-1	Mus musculus keratin associated protein 31-1 (Krtap31-1), mRNA [NM_027568]	CTTCTGCTTCTGAATTACCCCAGATTTTGTGTGTGCGATTTCCTTCTTTCTTCTCACTAG
A_30_P01033312	-1.48146	2.79232	down		lincRNA:chrX:148720661-148763177 forward strand	TTCCAAGAAACACCATGCACAGCCCAAGTTGTAACAGGTTGGGATGGGGCTGGGTGCAGG
(+)E1A_r60_3	1.48113	2.79167	up		Unknown
A_30_P01028824	-1.48087	2.79116	down		lincRNA:chr10:21463672-21466812 forward strand	ATCCAGATCACCAGCCTGCTTCTTGGAGACTGAAATGGGAGCACACGGCAGCCTGTCTCA
A_30_P01033010	-1.4797	2.78891	down		lincRNA:chr11:33414450-33450750 forward strand	AAGGAAATAAAACTGAATGAGGTTAAACCAGGCCACAGACCTTTGTGATGGAGGGCAGGA
A_30_P01026054	1.47783	2.78529	up		lincRNA:chr15:74477644-74477736 forward strand	TGTTCTCCTGTCCTGGATGATTCACCCCAAGTCTGTAATGTTGTAAAGATGGTTTCTGTG
A_51_P448784	1.47284	2.77569	up	Nrsn1	Mus musculus neurensin 1 (Nrsn1), mRNA [NM_009513]	TGTCATCCCTCCAGTGTAGCTCTTTTCTCTCCACCATGTAATTTTCCATTCTGAGACTGA
A_30_P01017732	-1.46987	2.76997	down		lincRNA:chr18:6144775-6202105 forward strand	CAATTATGATCTGAGTCTTCTGACTATGGCTCCAAATTTAATAATACAAATATCTGTATA
A_55_P1999511	1.46842	2.76719	up	Aurkc	Mus musculus aurora kinase C (Aurkc), transcript variant 2, mRNA [NM_001080966]	AGGAAGCTCTCCAGGCTCTGTTTGTTAGTGCATGTGGATTGCTTGTTTTCTCTTTTATGA
A_30_P01024349	-1.46671	2.76391	down		lincRNA:chr2:168606645-168621395 forward strand	AGATGGAGACCATCAGGACCTACTCAAAACATACTGAGTAAGGGGAAATTACAGGGGAGA
A_55_P1988994	-1.46597	2.7625	down		Mus musculus clone 3D1I-05L immunoglobulin light chain variable region mRNA, partial cds. [HQ446714]	AATCAGCAGAGTGGAGGCTGAGGATTTGGGAGTTTATTTCTGCCTCCAAGTTACACATGT
A_55_P2183592	-1.46417	2.75905	down			GAAACAACTCCCTTCACAATAGCCACATATAATATAAAATATCTCAGGGTAACTCTAACC
A_55_P2124478	-1.46312	2.75704	down	Olfr220	Mus musculus olfactory receptor 220 (Olfr220), mRNA [NM_207694]	TAAAAAAGACTATACTTTGCAATAGAAGTGGTTCTGGGGGAGATGGGGATTTTAGTAGTT
A_30_P01033342	-1.46263	2.7561	down		lincRNA:chr3:121997064-122031218 forward strand	ACGGTTCGCTAAAGGGGGAGAGGAAATTCTCAGTGGGGAAGGGCATTTTTATATTAAGGG
A_30_P01019634	1.46251	2.75588	up		lincRNA:chr1:138567345-138578139 forward strand	AAGTGCTGAGTCACCTCGTCCTCTCAGGGTCAGACACTTTCACGCAGGAAACGTCCTGCA
A_30_P01032161	1.46249	2.75584	up		lincRNA:chr1:75075500-75102200 reverse strand	GCCGTCTGCTTTCTGTTGTTTTCTTCTATTTTGGACAGTTTAGGATCTAGAGTTTTTAAT
A_30_P01018383	-1.46086	2.75272	down		lincRNA:chr7:117144653-117150145 reverse strand	TGTAAGGGCATGGCGGGGGCCAGAAGCTGATTCCACAACAGGCCAGACAAATCCAAAATG
A_55_P2135920	-1.46052	2.75207	down		BC046566 Anapc5 protein {Mus musculus} (exp=-1; wgp=0; cg=0), partial (50%) [TC1614758]	GCATTAAATTAATAAGCAATAGGACACCTAAAGGGGATCAGGGGGATGCAAATGGGAAAG
A_55_P2136890	1.45949	2.75011	up			AGTTTTGGTGAAACTTGCAGAATGTGGCTTTTGCACTTCTGTGGCTGTGGGTGAAGCTAA
A_55_P2092282	1.45791	2.7471	up			GGTTTTGATCCCAGAACTCATGTAAAAATGTGTGGTGGTGTTGGTGTGTGCTTTTAGTCT
A_30_P01023736	-1.45591	2.7433	down		lincRNA:chr5:125205454-125209470 forward strand	ATTCCCTTGGTCTTTGATGAGGAGGGAGAGGAAGAGGAGAGTGACTATCAAAAAGTAGAG
A_55_P2378707	-1.45243	2.73669	down	4930509J09Rik	Mus musculus RIKEN cDNA 4930509J09 gene (4930509J09Rik), long non-coding RNA [NR_040547]	AGAGATTCAAGATGGAACACTGAGGCCCATAACTAAACACAATAAAAGCAATATACAGCT
A_55_P1960237	-1.4506	2.73321	down	Slc2a6	Mus musculus solute carrier family 2 (facilitated glucose transporter), member 6 (Slc2a6), transcript variant 1, mRNA [NM_172659]	TGTGGAGATCGTGACCCTGGGGGACACAGCCTTCAACTATCTTACCCTGATACCCCTGCT
A_66_P102163	-1.45054	2.73309	down			TTGCAAAGAAACTAGGAGAGATATGCAGCACATGACAAACAGCCCTATGAGAAGAAGGCT
A_30_P01030870	-1.44864	2.72951	down		lincRNA:chr5:23363666-23371611 reverse strand	TCAAAATAAAACACAACATAGGCCAGAGGGGTAGCACAATATAAGCCAGAGGGGCTAGGA
A_30_P01018344	1.44595	2.72441	up		lincRNA:chr15:32705156-32729116 reverse strand	GTTGTGCTTTCACTCGGCGGACTCCGGTGTCTGGGTCGCAATGCTGTCTGATTTGAAGCA
A_30_P01017549	-1.44316	2.71916	down		lincRNA:chr3:95500407-95500904 forward strand	AAATTAATCTTGACAAATGGCCCTGAAGACTTAAGAGCAGCAGACACAGAAGGGCAGGGA
A_55_P2058487	-1.44057	2.71428	down	Gm4419	PREDICTED: Mus musculus predicted gene 4419 (Gm4419), misc_RNA [XR_168485]	AAAGTGGATTCAAATGCTAAACGGAACCAAGCAGACCGAAGACTGCAGAAAGGAAGGTCT
A_55_P2165249	1.43666	2.70693	up	Papln	Mus musculus papilin, proteoglycan-like sulfated glycoprotein (Papln), transcript variant 1, mRNA [NM_001205343]	TTTGTAGACTTTACTAATTGAACGTCCCTAACCTAAAGTTCTGAAATGCTCCGAAGCTTC
A_30_P01031849	1.43433	2.70257	up		lincRNA:chr11:69185658-69186082 forward strand	ATCTTTTTACTCTACTTATCAGCTGTTTCTCCTAGGGCTTCCAAGGGTCGTGCTGACAAC
A_55_P2018377	-1.43335	2.70073	down		NKX23_HUMAN (Q8TAU0) Homeobox protein Nkx-2.3 (Homeobox protein NKX-2.3) (Homeobox protein NK-2 homolog C), partial (5%) [TC1771210]	GGCCGCCATACAAACACCTCAGCATATGCATGCCCACACAGAAATAAATCAAATAAAAAA
A_55_P1967095	1.42996	2.69439	up			ATGTTCTAGATGGAAGGCCACTGACATCAATCACCATTCTTACTTGCTGCCTGCCTCTTT
A_55_P2103952	1.42703	2.68892	up	Gm3424	PREDICTED: Mus musculus predicted gene 3424, transcript variant 1 (Gm3424), mRNA [XM_001477003]	CCTGTGGATGATGTGATGAACACATTAATGTCAAATACATCAGTATTTCTGTAATAGCTC
A_30_P01031431	1.42387	2.68303	up		lincRNA:chr1:138570107-138632310 forward strand	ATTTATTCTAGAACCGATGTGCCAGCGTTTCCTTCTGTGTGCTTTGAGTAGGAGCAGGAA
A_30_P01029547	-1.42309	2.68158	down		lincRNA:chr4:131738732-131739264 forward strand	CAACAGCATCATATAATGGATACAGTACACTGAAAGACAATGAACTGTGAGTCTCCTGTC
A_30_P01025657	-1.42152	2.67867	down		lincRNA:chr13:73472571-73483846 forward strand	CCTCACTTGGGAGAGGAGAGGAGCAAGCAGAGAATTTTTATAGAAGAAGCCCACTCTTCC
A_51_P412809	-1.42062	2.677	down	Dqx1	Mus musculus DEAQ RNA-dependent ATPase (Dqx1), mRNA [NM_033606]	AGAAAGCACTGCTGTCAGGATACTTCCTCAAGGTGGCCCGAGACACAGATGGGACAGGAA
A_30_P01020327	1.41932	2.6746	up		lincRNA:chr1:138570107-138632310 forward strand	TGTCTCACTCCATCTTTACCTGCCCTGTAAAGGAGGAACTGTTGTTTTTAGTCTCCTGGA
A_55_P2181753	1.41608	2.66859	up	Bdh1	Mus musculus 3-hydroxybutyrate dehydrogenase, type 1 (Bdh1), transcript variant 2, mRNA [NM_001122683]	GTTTACCTTTTGATTAGCTGTTGAGGATTACCCACTGTCTTAGGAAGACCTATTTTAACC
A_52_P89049	1.41302	2.66295	up	Dlg2	Mus musculus discs, large homolog 2 (Drosophila) (Dlg2), transcript variant 1, mRNA [NM_011807]	ACACTTCAGTCTGTAAATATTCTTCCTCACTGAAACCTGTGCTTCAGAAACCATTTCTCG
A_55_P2040845	1.41115	2.65949	up			CCTTCTTCTCGGAATACTTCCAGAGAAGGGAGAGGAGGTACAATGGCTGCTTTTGATATT
A_30_P01021606	1.41098	2.65918	up		lincRNA:chr6:50339188-50409363 reverse strand	GGTAGATTATCTTCCATCTTCCCTTGGGTAAAGGTCCCTGGAAGTATATTCATATTTCTT
A_55_P2117081	1.41078	2.65882	up		T cell receptor gamma, constant 1 [Source:MGI Symbol;Acc:MGI:98625] [ENSMUST00000103558]	ATCATCAGCTTCTCTCTGCTTAGAAGAACATCTGTCTGTGGCAATGAGAAGAAATCCTAA
A_55_P2067473	1.40963	2.65669	up	Gm14015	Mus musculus predicted gene 14015 (Gm14015), long non-coding RNA [NR_040637]	TTTCTCTGCTCACAGGTCTCTGCATCTTTGATCTGCTTTTGCTTCTCTGCACAGACAAAG
A_55_P2144481	-1.408	2.65369	down		olfactory receptor 1326, pseudogene 1 [Source:MGI Symbol;Acc:MGI:3031160] [ENSMUST00000059880]	AGCTTAAGGAACAAAGAAGTCAAAGGTGCCCTCAGAAGACTCCTGGTGAACCATAACTGA
A_30_P01019659	-1.4065	2.65093	down		lincRNA:chr4:40840725-40860875 forward strand	CTCCTACCTGAAGGACAGTTGGCAATCTAAATAATAAAAACACTGGTATGCATTCAAATC
A_30_P01026533	-1.40538	2.64888	down		lincRNA:chr7:6210340-6229115 reverse strand	ACAATGCCATAATTAGAAAGCCAAAAGCAAGATCAGGCTCTGGGGGGCTGGGAACTTATT
A_52_P121502	1.40503	2.64823	up	Pllp	Mus musculus plasma membrane proteolipid (Pllp), mRNA [NM_026385]	GATTTCTGGGACTGGACGATTTCTGATAACTGTTGGTTACAACAGTTTCCGATGGCAGCA
A_55_P2021735	1.40344	2.64531	up			TGCTACCGTGGTCTTCCTGATCCCGGACGGACATCCTCCTTTTATCACCAGGAACCTGCT
A_55_P2093849	-1.4018	2.64231	down	Nol4	Mus musculus nucleolar protein 4 (Nol4), transcript variant 2, mRNA [NM_199024]	AAATCATCAGGAGCAACTCCGATTTGGCTCCTCTGAGCATCGGAGGGGGGTCCATGACGT
A_55_P2095227	-1.40077	2.64042	down			AGTTGTATGCGTTAACTGTGGATTTAGTTCAACCAAACTCGGGTCCACCAAATGGGGAGT
A_30_P01019323	-1.39717	2.63384	down		lincRNA:chr6:145727805-145728171 forward strand	ATGAGAAATTAGGAAGGAAGGTAGAGCCAATCACCTCTTCTCCATGAGCGGGTTCTTAGA
A_30_P01029608	1.39443	2.62885	up		lincRNA:chr18:79286360-79304510 reverse strand	AAGGCACAGTGTTTCTAGCCTGTTGTTTTCATCTCATTGCTGGCTACCAGAAAAGGGATG
A_55_P2040090	1.39335	2.62688	up	Fn3k	Mus musculus fructosamine 3 kinase (Fn3k), transcript variant 2, mRNA [NM_001038699]	TCTGAGATTCAATTTTGTATTCTCGCCATGACAGATGCTCAATAAATGCACATTTGCTGA
A_30_P01031796	-1.39319	2.62658	down		lincRNA:chr6:35201798-35217831 reverse strand	TCGGAACTTGAAGGACTACATATAAACAAACCCAGGCAAAGACCCAAGGACTTAGGAGGA
A_30_P01029677	1.39317	2.62656	up		lincRNA:chr2:22753100-22780375 forward strand	GCCATGAGTTTTTGTTTCTTCAGTTCCTTCTGGGATATCTTTTTCTTCTGTGCAGCCTCC
A_51_P169327	1.39281	2.62589	up	Etd	Mus musculus embryonic testis differentiation (Etd), long non-coding RNA [NR_034074]	TGAATGGGTTTGGACACTAAAATAGAGTTCACCCTCCAGAATACAGTGGCTGTTGCTAAA
A_51_P335569	1.39197	2.62438	up	Slco1a4	Mus musculus solute carrier organic anion transporter family, member 1a4 (Slco1a4), mRNA [NM_030687]	TATCTCGGTGGATATGTGATTGCCTAATACATGTGAGGCCCTGAGTTCAACCACAAGGTA
A_55_P1975546	-1.39114	2.62285	down	Gm20736	Mus musculus predicted gene, 20736 (Gm20736), mRNA [NM_001037748]	CCATCATGGAGAATAATCTGAAGTACTCTTCTACTTTCCCATTTTCAGAAAAATGAAGCA
A_55_P2173857	-1.38775	2.6167	down	Orly	Mus musculus adult male testis cDNA, RIKEN full-length enriched library, clone:4930529H12 product:RIKEN cDNA 4930529H12 gene, full insert sequence. [AK015935]	CCCTACAATTGGTCAGAAAAGTGCCTTGGAAATGCTGAAACACAATAAAAAACAAAAACA
A_52_P333825	1.38748	2.61621	up	Tas2r118	Mus musculus taste receptor, type 2, member 118 (Tas2r118), mRNA [NM_207022]	AAATGATTGGCTTTGGTATTCCTTTCTTCGTGTTCCTGGCTTCTATCATCTTACTCACAG
A_30_P01032672	-1.38698	2.61531	down		lincRNA:chr5:147538052-147546377 reverse strand	CCCTCAACACACGCACCATCACCAAAAAACAAAAATAAACAAACAAAAAACTGGCTTAAT
A_30_P01030674	1.38657	2.61457	up		lincRNA:chr15:61919018-61935580 forward strand	GTCCTGCTTCTGTGGTCTATAATCATTGACCGGTCTTGCTTAATGAGGGTGTAGGGAGAA
A_55_P1994746	-1.38647	2.61437	down	4930556N09Rik	Mus musculus RIKEN cDNA 4930556N09 gene (4930556N09Rik), long non-coding RNA [NR_045358]	AGACAGAGATAGTATGCAAACAAATGGGCATGGCCACGTTCCAATAAAACTTTATTTATC
A_55_P2032089	-1.3863	2.61407	down	Olfr480	Mus musculus olfactory receptor 480 (Olfr480), mRNA [NM_020291]	AACAAAGAGGTTAAAGAAGCCATGAAAAAACTGATTGCTAAAACACATTGGTGGTCCTGA
A_55_P2166486	-1.38442	2.61068	down	Cd44	Mus musculus CD44 antigen (Cd44), transcript variant 1, mRNA [NM_009851]	TACATTACATGGAGAGCCGGAAGAAGACGAAAACCATCCAACAACTTCTATTCTGCCATC
A_55_P2050073	-1.38363	2.60923	down			GCAGCAAAAACCTCCCTAATAAACCTCATGGCTCCCACGAAAGAGGCAATTAACTATCAT
A_30_P01020239	-1.38349	2.60899	down		lincRNA:chr9:65368908-65377592 reverse strand	GTGGACAAAAAGCTAGATTTGGTCTCAGAAGACAAAACACACCAACAGTAAACAAAGGAG
A_55_P2177371	1.38213	2.60653	up	Gm3086	Mus musculus predicted gene 3086 (Gm3086), non-coding RNA [NR_036607]	GAGCTGCATCAAGGAGTGACAATGTGACCGCCTCCAGTGTCTCCAGCACAGCTGTCATTA
A_55_P2290914	-1.38205	2.60639	down	Trav3n-3	Mus musculus 16 days neonate thymus cDNA, RIKEN full-length enriched library, clone:A130010C18 product:unclassifiable, full insert sequence. [AK037357]	CTCCAGGGAAACATTACCATGAAGAAATCTAAAAGGGAGACAAATTAATTTCATTATCGC
A_30_P01019668	1.37921	2.60125	up		lincRNA:chr1:59504708-59506348 reverse strand	TGGATTCTTTCAGACTTTTGAGCTCCTAGCACAGGGACTCAGTAGCTTTGGGCTTATGTT
A_30_P01019680	-1.37726	2.59775	down		lincRNA:chr1:59775022-59780348 reverse strand	TAAGTATTGTATAAAAATTAGAAAGGGTCGGAGATGCATTACAGGGTGGGGTGGGGCACT
A_30_P01025549	1.37474	2.59321	up		lincRNA:chr8:124569775-124639500 reverse strand	AGTCTGTGTGCATGAGTGGCAGGTGTGTGACTAGTGTGTGTATGAGCCTATAAATGATTG
A_55_P2109559	1.3746	2.59295	up	Trim6	Mus musculus tripartite motif-containing 6 (Trim6), mRNA [NM_001013616]	GCACCAAGCTTAACCCCATTTTTGTGTTTTGTATTGTTATTATTGGGGTTTGTTTGTTTG
A_51_P474551	-1.37394	2.59178	down	Cyp19a1	Mus musculus cytochrome P450, family 19, subfamily a, polypeptide 1 (Cyp19a1), mRNA [NM_007810]	AAGTAGTATTAGCCTGAGTAAAATATAGCTAGGACTCTATGTGTGGTGTAGGGGGAAAAA
A_55_P2036130	-1.37364	2.59123	down			AACCCGTACCTGGCATTATAAGCAATCATTCAGAGAAATAAACAACAATTACAACTTTGG
A_30_P01029259	1.37153	2.58745	up		lincRNA:chr5:136371885-136372424 reverse strand	CTGAGTTAGAATTTATTTCTGGTTATAGGGGAGTGAAACCCTTGGACACTTGCTAAGAAG
A_66_P108380	1.37016	2.585	up	A330021E22Rik	Mus musculus RIKEN cDNA A330021E22 gene (A330021E22Rik), mRNA [NM_172447]	TGTCCTTCTTTTCAGTACGTTAGACAGCATTTGGTGCTGCATTTTGGGATGTTATGATTC
A_55_P1969977	-1.36893	2.58279	down	Myo15	Mus musculus myosin XV (Myo15), transcript variant 1, mRNA [NM_010862]	ACCAGGTACACATGTGATGCAGACATATGTGCAGGCAAAATACCCATATCCATAAATAAA
A_52_P319066	-1.36805	2.58122	down	Mex3b	Mus musculus mex3 homolog B (C. elegans) (Mex3b), mRNA [NM_175366]	CTTTGCTCACAATGGGAACAACAACAATAACGGCAATGGTTACACCTACACAGCGGGGGA
A_30_P01020745	1.36755	2.58032	up		lincRNA:chr17:74595885-74597555 reverse strand	TGTAGTTCAGAGTTGGCCAGTAATTTAGCAGTAGTTTGCCACAGATGGCTGTACGTTCCT
A_30_P01018716	-1.36736	2.57998	down		lincRNA:chr12:106572079-106575298 reverse strand	ACTATTCCAGAAGACATAGAGATGGGGCAGGGGAGGTGGATGATTGATTAGGATTTCTGA
A_55_P2021423	1.36632	2.57811	up	Morn3	Mus musculus MORN repeat containing 3 (Morn3), mRNA [NM_029112]	TTGCCTCCTTATAGTCCAGCTTTTCTTTCTTGGTTACTCCTCTCTGAAACACGAGTTCTT
A_30_P01032769	1.36387	2.57375	up		lincRNA:chr8:108098325-108110775 forward strand	TGTGTTGTCTGCAGTCCCAGCTCACAGATTTTGTTATATAGCCTGGAATGCTGCAAAGGT
A_55_P2418021	1.36191	2.57025	up		Mus musculus 16 days embryo head cDNA, RIKEN full-length enriched library, clone:C130021O09 product:hypothetical protein, full insert sequence. [AK081501]	CTCCTTTTCTAAGACATAAAAATGAGTACGGTATTGTCCTTCCCCTTTAAGAGCTTATAC
A_66_P114158	1.36117	2.56894	up	4930487D11Rik	Mus musculus RIKEN cDNA 4930487D11 gene (4930487D11Rik), long non-coding RNA [NR_046191]	CTTCAATGACCTCTAAACCTTTGGAGAGGCACGTGCTAGGTGGTTCTGTTCTCCCTCTTG
A_55_P2114367	-1.36111	2.56882	down	Ccdc162	Mus musculus coiled-coil domain containing 162 (Ccdc162), mRNA [NM_001177571]	TCCTAAAAGATGTGGAGCAAAAAGAGCAAAAACTACAGCTCCTGACAGAAGAGGCTGAGC
A_51_P407417	1.35886	2.56483	up	Adamts9	a disintegrin-like and metallopeptidase (reprolysin type) with thrombospondin type 1 motif, 9 [Source:MGI Symbol;Acc:MGI:1916320] [ENSMUST00000125490]	TTGACACCTAAGAAAATTCTCATAGTTGCAAGCATAACTCTGTATTCAGTAAGATGTGTC
A_55_P2003103	1.35809	2.56345	up	1500012K07Rik	Mus musculus RIKEN cDNA 1500012K07 gene (1500012K07Rik), transcript variant 2, long non-coding RNA [NR_045812]	TTGCCACAGAGATTGATTTTAGAAGGTTTGCAGGGTCTGGCTAAATAAAGAACCACTCCT
A_55_P2099860	-1.35693	2.56139	down	Abt1	Mus musculus activator of basal transcription 1 (Abt1), mRNA [NM_013924]	CGTCAGGAAGGTCTTGATCCAAACAGTCACAAAGGTAATAAAAGTCAGATTTACATCTTC
A_55_P2019684	1.35569	2.55919	up	Bspry	Mus musculus B-box and SPRY domain containing (Bspry), mRNA [NM_138653]	ATACGAAGGACAACCTGCCAGGATACTGTTGGCCAGAACGTCGTCGTGGGAGTGTGGTAG
A_55_P2249871	-1.35491	2.55781	down	BC001981	Mus musculus predicted gene, ENSMUSG00000050599, mRNA (cDNA clone IMAGE:3487972), partial cds. [BC001981]	TGCACTTAGCACTTAAAACGGGCAGAACGCATAGAAACAAACACTTATCTATGACTAATT
A_55_P1967124	1.35475	2.55753	up	Ankef1	ankyrin repeat and EF-hand domain containing 1 [Source:MGI Symbol;Acc:MGI:2441685] [ENSMUST00000154343]	ACTGGTTAAGGAGCTGGCTGGGCATCAAGAGCATTTTCTGTCTACCATTTCTGTGAGATA
A_30_P01025841	1.35336	2.55507	up		lincRNA:chr13:62376235-62376890 forward strand	CTCTGAAAATAAAAAGTGGTAAAGCCTTTGCCCAGCACAGATATCTCGGGAATGCAGAAA
A_30_P01027504	1.3531	2.55461	up		lincRNA:chr1:167219841-167220505 forward strand	TTCTCCATTGGGAGGAAGTATTCTTCTGCACTTAGCCTTAATCTTGGGGCCTTGAATCCT
A_55_P2065549	1.35131	2.55144	up	Dppa4	Mus musculus developmental pluripotency associated 4 (Dppa4), transcript variant 1, mRNA [NM_028610]	CCAATGCTAAGAAGTACGAGGCAGTGCCAGCCGATGCTTCGTCCTCATCAGAAGTCAAAG
A_30_P01018266	1.34995	2.54903	up		lincRNA:chr8:124355710-124401160 forward strand	ACGTCCGCACCTCACCTAGATCCCGGTCTTGTTCACAGGCTCTGATCTGAGTGAGTTCAG
A_30_P01029347	-1.34914	2.5476	down		lincRNA:chr8:41934312-41945487 forward strand	AGGCAGCAGCATAGGCATAAAATCCATAAGTAGAGCCTCCTGGCATGTTCACAGGCAGAA
A_30_P01031660	-1.3489	2.54718	down		lincRNA:chr4:136856064-136875614 reverse strand	CATTCTGTTGCTTGGAGGATGCAAAAAAGATGCTAATAAGATAACTCAAAATGCTGTTCA
A_30_P01019392	-1.34841	2.54631	down		lincRNA:chr14:115423660-115463160 reverse strand	TGGGGGTGGGGTGAAGACAGAGAAAGGGTAAGCACATTTGCTCAAAATTACTACCACTTT
A_55_P2000444	1.34555	2.54128	up			GTACTGGATGCCAAGATTGAGAAGACCTCTACAGCAGCCATGACCATGCCCTTAGTCCTA
A_55_P2042680	1.34284	2.53649	up		predicted gene 15506 [Source:MGI Symbol;Acc:MGI:3782954] [ENSMUST00000148776]	AGGCTCATAAAGATGACTAGAGTTCTCTGGAGCTTTGTAAATGGTTAAGCACGGTATAAA
A_55_P2037752	1.34173	2.53454	up	Dtna	Mus musculus 18 days pregnant adult female placenta and extra embryonic tissue cDNA, RIKEN full-length enriched library, clone:3830432L08 product:dystrobrevin alpha, full insert sequence. [AK028402]	TGGGCCCAATTTCTGAAGTTTAGATGGCATCTTTCTTCTCAAGAGACCTCAAGAGACTGA
A_30_P01020522	-1.34134	2.53387	down		lincRNA:chr14:65720392-65769859 reverse strand	TTTCGGGTTCTCATTTCCCAAATTCAAAGAATGAAATTCATGTACCACAGTGGGGGTGAG
A_55_P2017496	1.34016	2.53179	up	1700028I16Rik	Mus musculus RIKEN cDNA 1700028I16 gene (1700028I16Rik), long non-coding RNA [NR_038042]	CTTCTTGCTTTGGATCTTCTGAATTCCTGCAGTTGGGACAGCTCACACAGAGCAAATTGA
A_55_P2125451	-1.33911	2.52995	down	Sprr2j-ps	Mus musculus small proline-rich protein 2J, pseudogene (Sprr2j-ps), non-coding RNA [NR_003185]	CCTCAAAGAATGTTTTCCAAATCTGATTGTCACTGGTGTTCTATTTCCTGAATAAAGTAC
A_52_P71704	-1.33819	2.52834	down	Kcne1	Mus musculus potassium voltage-gated channel, Isk-related subfamily, member 1 (Kcne1), mRNA [NM_008424]	TATAAAACAATAATAAAGAAGATTTAAATACACAATACAATCTAATTAAAAGCAACCCCC
A_55_P2034625	1.33745	2.52705	up	Sema6a	sema domain, transmembrane domain (TM), and cytoplasmic domain, (semaphorin) 6A [Source:MGI Symbol;Acc:MGI:1203727] [ENSMUST00000151382]	CTCCTCTACCAGATTATGAAATGTCTTTCAACAGAGTGTATGGTCAGTTTATTGCTATAT
A_30_P01027381	1.33736	2.52689	up		lincRNA:chr7:140012897-140014750 reverse strand	AATGTAGTTGGCTTTTCTTGTTTCCTTTCATTGAATAGTTGCAGATTGTTTAGGTGGACT
A_55_P2140280	1.33641	2.52522	up	Gm9869	PREDICTED: Mus musculus predicted gene 9869 (Gm9869), mRNA [XM_003945454]	CCAAGACAGTTTATTACCATCTTCATTCTGCCCATGAAAAGAATCTTGCAGTCGCTCAGT
A_55_P2053714	-1.33491	2.52259	down	AA619741	Mus musculus expressed sequence AA619741 (AA619741), non-coding RNA [NR_033627]	CAAAAACAGAAACTGACTTGCTCAGCTCAGAAAATGGAAAGAAGCACCTTTGGGGTGGGA
A_30_P01032107	-1.33481	2.52242	down		lincRNA:chr12:5303823-5379098 forward strand	AAGACAAGGCATTTTAACAAAATGGCTCCAGTATGGAGGTGGGTGGGTACAGTACAAGGT
A_30_P01020078	1.33404	2.52107	up		lincRNA:chr1:138528250-138538250 forward strand	TTTTCTGGTGATACATAGTGATAAGATTCCGTTAGTGCAGGACTGCTAGAGCTGTGGTGG
A_30_P01025577	1.33091	2.51561	up		lincRNA:chr6:99472981-99484210 reverse strand	CAATGTATTTTTCTCCAAGGACTGGCTACACTGTAGATTCTTATTTAATTCTATGTGACT
A_30_P01030544	1.33012	2.51423	up		lincRNA:chr1:133839368-133839762 forward strand	TGTTATCTGGCTGTTCGTTTTGGCTTTAGTCAGATTTTCAGTTTTCTCTGCTCAGTTGCT
A_55_P2134557	1.3297	2.51351	up	Ms4a13	Mus musculus membrane-spanning 4-domains, subfamily A, member 13 (Ms4a13), mRNA [NM_198224]	ATGTAGTGCCTTTATTGTCCCAAGGCTTTTCCTGACCTCATTAAAGTTCCTTTCTGCCCT
A_30_P01033295	1.32882	2.51197	up		lincRNA:chr17:3198868-3394643 forward strand	TTACACTGTAGACTGTAAACAACGTGGGCTTGTGTTTGCACACTTGTGAGTGCTTCCACA
A_30_P01017476	-1.32787	2.51032	down		lincRNA:chr5:123440192-123451767 reverse strand	GAAAAACAAAAAACCACCCAGAATGCTAAGTAGAACATTAAGCCGTTCTCCAAGAGTCAG
A_30_P01033532	-1.32717	2.5091	down		lincRNA:chr9:39982939-39992189 forward strand	ATGCATGCATACGTCAGTCTACACAAACTTATAGATAACTGGGGGCATACTGTCAACAAG
A_66_P108603	-1.32688	2.50859	down	E030018B13Rik	Mus musculus RIKEN cDNA E030018B13 gene (E030018B13Rik), mRNA [NM_001256311]	AGGAGAAGAGAACCAAGCAGAACAACAACAAAAAAGTACCCCCAAAATATCCATGGTCTC
A_55_P2022024	1.3238	2.50325	up	Olfr212	Mus musculus olfactory receptor 212 (Olfr212), mRNA [NM_001011800]	TTTCCCTGTCTTTTCTTAATGAACTGTAACTTGAAAGCCAAATAAACCCTTTTCCTCCCC
A_55_P2175180	-1.32323	2.50225	down	Gm2379	Mus musculus adult male cecum cDNA, RIKEN full-length enriched library, clone:9130206D17 product:unclassifiable, full insert sequence. [AK033636]	GGAGAAGAAAATCAAATGTGTATGAATAATTGAGCTGGGACCTTGAATAAACTTAACCCA
A_66_P110425	-1.32196	2.50006	down	Kif6	Mus musculus kinesin family member 6 (Kif6), mRNA [NM_177052]	GGGGGGCAGTGGAGGTGCAGAAATAGGTGCCCAGAAATAATTACAGCTGAATAAAAATAC
A_55_P1952684	-1.32067	2.49782	down			TGGAACATGAAAATCAAGAACATTGTAAATGCAACAATAAGGGGGAAATGCAATTAAAAA
A_30_P01027464	-1.31941	2.49564	down		lincRNA:chr17:15100982-15115630 reverse strand	GGCAGATGGAATATTGGCAGCAGTCAAAGAATTTGCATACCATCGTTATAAATTCATTAT
A_30_P01023711	-1.31857	2.49419	down		lincRNA:chr6:86448774-86450531 reverse strand	AGGAACTAGCACAAAGGGTTTGGAAAAATACACCCTAGAAGCATAACCCTGCATAGGCTG
A_55_P2166713	1.31777	2.49281	up	Gm13446	Mus musculus predicted gene 13446 (Gm13446), long non-coding RNA [NR_045894]	GAGGAATGTCTTCATGTACCCCACTCGTATCCATCTGATGACTTCTGTAGGTTAAACTGT
A_55_P2407344	1.31737	2.49211	up	Fam92a	family with sequence similarity 92, member A [Source:MGI Symbol;Acc:MGI:1915349] [ENSMUST00000152219]	GGATCCTGAGAGTAAACCCATTTACTTGTTTCAACTTACAGATTCTCTTAAAAAGAAGCA
A_30_P01025134	1.31349	2.48542	up		lincRNA:chr10:42691088-42710968 reverse strand	TCAGTATCTTGAGATGAGCATCCTGGAAAAGTTAAAGGTTTTTGTTTTTACCCCTCCCCC
A_30_P01031829	-1.31085	2.48087	down		lincRNA:chr4:44181997-44249172 reverse strand	ATAATGTTACAATAAGATACAATAAGAACTAGTTAAAAGAAAAGGTGGGGCTGACTATTA
A_55_P2054684	1.31071	2.48063	up			TGACCTGAACCAGTTCTGCATCTTTGTAGCCGAGCTCGTTATCGGTGTGAATTTATGTGA
A_55_P2240823	-1.30721	2.47462	down	Epb4.1	Mus musculus erythrocyte protein band 4.1 (Epb4.1), transcript variant 2, mRNA [NM_001128606]	AACATCATGACAACAGAGAAGAGTTTAGCGGCTGAAGCTGAGAATTCTCAGCACCAGCAA
A_55_P1972772	-1.30703	2.47431	down	Gsg1	Mus musculus germ cell-specific gene 1 (Gsg1), transcript variant 3, mRNA [NM_010352]	GTTTGGGAAGCAGGCTAAGTCCTACCATAGGTGTCGCTCACTATCAACATCTGCTTAAGC
A_55_P1971527	1.30635	2.47316	up			ATCTGCTAATTGCTCTTCAGGTGTTAGTACTTTAGATTCTTCAGGTTCTTCTAACCTCTT
A_51_P213691	1.30633	2.47312	up	Scnn1a	Mus musculus sodium channel, nonvoltage-gated 1 alpha (Scnn1a), mRNA [NM_011324]	TGGGTAGACTGAACTGTGCTCAGGGATGAGCTTTGCTCATTTTTGTATCCTTCCGTTCTA
(+)E1A_r60_n11	-1.30395	2.46905	down		Unknown
A_30_P01020422	1.30377	2.46873	up		lincRNA:chr6:125330524-125410249 forward strand	TATCTGAGACTTCGGAGGGGTGAAGATCCTGGAGTGCCTGATCTTGGCAACTGGTAGCTT
A_30_P01031242	1.30356	2.46838	up		lincRNA:chr6:145647711-145756861 forward strand	CTCTCTTGGTAGGGTTTCTCTGTCCACTTGGACCCCTTTGTAAACAGCCTGGGTCAGAGA
A_55_P2071082	1.29938	2.46124	up	2310002D06Rik	Mus musculus RIKEN cDNA 2310002D06 gene (2310002D06Rik), long non-coding RNA [NR_045490]	AGGAATCATTTCTGTAGTTCGTTACTGAAGACCAGTTTGCAATAAATTATTTCTTCCTCC
A_55_P2245852	1.29919	2.46091	up	Tspan32	Mus musculus tetraspanin 32 (Tspan32), transcript variant 1, mRNA [NM_001128080]	GCACTGGAATCGAATCAAGATTGCCAAATGCCAGATACTGATCACCAACTTCCTAGTCTT
A_55_P2026614	-1.29674	2.45672	down			GCCCAGCATTTGATAAAAATGAGAATATATCGCCTCAAGAAGAAGCAGATGAAGATGTGG
A_55_P2103026	-1.29471	2.45327	down	Sema3d	Mus musculus sema domain, immunoglobulin domain (Ig), short basic domain, secreted, (semaphorin) 3D (Sema3d), mRNA [NM_028882]	GGTACCTATCTCAAGGGCATAACATTATCTGCAAGGGACTAGTATAATAATGAATATTTG
A_55_P2178784	-1.29274	2.44993	down			ATCAGAAAACGGTGGACTCACAGATTTTGCCAAAGATTAAACCGTTCCCCAGCTTCAAGG
A_52_P533265	-1.2924	2.44935	down	Spata31d1d	Mus musculus spermatogenesis associated 31 subfamily D, member 1D (Spata31d1d), mRNA [NM_177711]	TCACCAGCACACGACCCGGAACAAAAGGGGAGAGCTACCTTTCCTGGGAACACTGTAGCT
A_55_P2142473	-1.28934	2.44415	down	Gm10389	Mus musculus B16 F10Y cells cDNA, RIKEN full-length enriched library, clone:G370047F19 product:unclassifiable, full insert sequence. [AK148198]	CCTAAGAGCATGATGGGAAATATGATATGGGCCAGATACTAAATAAAAGACAACGGCTTG
A_55_P2088149	1.2889	2.44341	up			AAGGCTTTGCAGCAGCTCTCCCCAGAGTCAACCTCTATGCAGAGCCAAAGCCTCCCAAGT
A_55_P1973164	-1.28845	2.44266	down	Bricd5	Mus musculus BRICHOS domain containing 5 (Bricd5), mRNA [NM_175682]	GTCACCAGTACCTATGGAAGGCAGCTGACAGTAGGGATTAATAAACCCAGATTGCCTGGC
A_55_P2056714	-1.28596	2.43844	down	Nlrp9c	Mus musculus NLR family, pyrin domain containing 9C (Nlrp9c), mRNA [NM_001042612]	TGGGTTGAAGATGAACTCAAAAAGAGGGGGGTTCGTCTGGTATGGAACAGCAAGAATTGA
A_55_P2041240	-1.28471	2.43633	down	Nav2	Mus musculus mRNA for mKIAA3015 protein. [AK129480]	CCTTGTCTCAAAACAAACAAACAAACAAACAAAACACACAAATGGGGTGGGTAGAAAGGA
A_55_P2048751	1.28382	2.43484	up	Prox1	Mus musculus prospero-related homeobox 1 (Prox1), mRNA [NM_008937]	ACGTTTGTTTTCTTAGCTGGATTTTTGTGTACGGGTGCAGTAAACAGCACTGTTCACTCT
A_30_P01018740	1.28322	2.43382	up		lincRNA:chr3:151746091-151753763 reverse strand	ATTTCTGTAGGATAGTGTCTGTGGGTGATTTCTGTAGGATGGTGTCTGTGGGTGATTTCT
A_55_P2103937	1.28285	2.43319	up	Gm10362	PREDICTED: Mus musculus predicted gene 10362 (Gm10362), mRNA [XM_003085972]	CTACTTGTGTAGGGACCCGACCTGTCTTGTCTGCTTTTCCCCACGATCTGCTCGAGTCTG
A_55_P1989683	-1.28278	2.43308	down	Usp9y	Mus musculus ubiquitin specific peptidase 9, Y chromosome (Usp9y), mRNA [NM_148943]	CACATCACTTGAATAACCCTCAGAAAAATGATAAACCACAAGAAACTCATGAAAGCAATG
A_30_P01019141	-1.28272	2.43297	down		lincRNA:chr8:108153471-108159672 forward strand	ATTCCAAGGCTATGGGGGGCGGGGAGAGAAGATGATTAGAACACCTGCCAATAGGGTCTT
A_55_P2243261	-1.28269	2.43292	down	9530097N15Rik	Mus musculus adult male urinary bladder cDNA, RIKEN full-length enriched library, clone:9530097N15 product:unclassifiable, full insert sequence. [AK020664]	TGGTACAGCCACTTTGGAAAACAGTTTTGTCAGTTTCTTAAAAAGGTAAATATAGGGGGT
A_30_P01017758	1.27971	2.42791	up		lincRNA:chr9:56914085-56914489 forward strand	CTTAATATTCCCTCAGTTAGTTGCTACTTGGCCCCCAAGTTGGATAGAAAGTAGGTTAGG
A_30_P01028004	1.2781	2.4252	up		lincRNA:chr2:170029045-170034220 forward strand	TTTATTGTTAAGGAAGACCTGTCAAGGGTGTCTTTGTCCTCCAGAGAGGGATGTTCTCCA
A_30_P01018842	-1.27753	2.42424	down		lincRNA:chr7:66570691-66573827 reverse strand	TCCCACAAATGCGCACTCGCACGTGCGTGCACACACATAGTAACAATTTTAATGAACAAA
A_55_P2383283	1.27724	2.42374	up	2310001H17Rik	Mus musculus adult male bone cDNA, RIKEN full-length enriched library, clone:9830143P17 product:unclassifiable, full insert sequence. [AK036632]	GGTGCTCGATTTCTAGTTATCATAAGGAAAGCAATAGCAGTTTTAAAGTCTTTTTCCTTC
A_55_P2180685	1.27616	2.42194	up	Olfr649	Mus musculus olfactory receptor 649 (Olfr649), mRNA [NM_147055]	TATGTAATCATCCCACCTGCACTCAACCCTATTGTCTATGGAGTGAAGACCAAGCAGATC
A_30_P01017666	1.27615	2.42191	up		lincRNA:chr18:84760623-84761084 forward strand	CTGTTTTAAGTGGCTGGAAGCCACTTCTAATTATACCTTCCTTTTTAAAAATGGAGAGTT
A_30_P01033093	-1.27439	2.41897	down		lincRNA:chrX:6950444-6952293 reverse strand	ATGACACCAGTACTACACCAGGCATCGAGATTTAATTGATCTATGTGACTGAGGCCGATG
A_55_P2164609	1.27429	2.41879	up	Gm960	predicted gene 960 [Source:MGI Symbol;Acc:MGI:2685806] [ENSMUST00000096325]	TATCTCGGAAGGCCTGCAGCTCTTCAGTAGACTCACTTTTAGATTTAAACAATCACTGCT
A_55_P2305900	-1.27232	2.41549	down	AA617406	AGENCOURT_10790126 NIH_MGC_154 Mus musculus cDNA clone IMAGE:30120315 5', mRNA sequence [CA481107]	ACATAGCACAACACCTCAAACACACGAAACGTGAGCTGATGCGCCCATCTAGCCACGGCG
A_30_P01019941	-1.26995	2.41154	down		lincRNA:chr10:18047851-18049641 reverse strand	CGGCAGATTGACAAACCAACCTGGGCAGAAACAAAATTAAACAAGTTCTCAGGCCTCTAA
A_55_P2140651	-1.26978	2.41125	down	Creg2	Mus musculus cellular repressor of E1A-stimulated genes 2 (Creg2), mRNA [NM_170597]	GGGGAAATTGGGGTGGAGGGGTATGATAATATTTCTTTGTAAACATATACTAAATTGTCA
A_51_P403610	1.26758	2.40758	up	Olfr1339	Mus musculus olfactory receptor 1339 (Olfr1339), mRNA [NM_146852]	TCTCCATACACCCATGTACTTCTTCCTCAGTGTCCTTTCCATGCTGGATATGAGCTATGT
A_55_P2094796	-1.26724	2.40701	down	Olfr62	Mus musculus olfactory receptor 62 (Olfr62), mRNA [NM_146315]	AATAAAGATGTGAAAAGGGCTTTCCTCAAGGTAGTGGGCAGCAGAAAAGGGTCAGAGTGA
A_30_P01030485	1.26665	2.40603	up		lincRNA:chr12:110944403-110988678 forward strand	TGGTCAATGGCTAGAGAGCTACACACCCTTGTGTGCTGAGCTGGCTAGGGCTGTCCTAGA
A_30_P01031099	1.26578	2.40458	up		lincRNA:chr5:122982442-123000053 reverse strand	TGTTCATGTGTATCGGATGGTTCTTATAATTCAAACCTTTCGATCTTCTCCCTATAGACA
A_55_P2076555	1.26468	2.40273	up	Hsd17b13	Mus musculus hydroxysteroid (17-beta) dehydrogenase 13 (Hsd17b13), transcript variant 2, mRNA [NM_198030]	TACCCATGCCTTGGTATATGAGTATCTGTGATGGTTTGTATATGCTCAGTCCAGGGAGTG
A_30_P01032999	1.26426	2.40205	up		lincRNA:chr4:54851872-54866706 reverse strand	CATGAGGTTCACTTCCTTATACTCTTCCTGGTTCTTGCACTGTTGTTTGATTTGCTCATC
A_30_P01024011	1.26353	2.40082	up		lincRNA:chr6:35441848-35450830 reverse strand	CAGTTTTGCTGAGTTCTGCTGGTGTCCCAAAGCTAGGAATCTAGAGCCTATCATGAAAGA
A_55_P2158469	-1.26335	2.40053	down			AAACACATACCAGGGACAGACTGTCATGATAACGACAGCATAGGAGGAAACAACAACTAG
A_30_P01029548	-1.26301	2.39996	down		lincRNA:chr5:92548501-92566401 reverse strand	AAGACAGGAGAAAGTTGTAACTGACTCTTGGAAGGATTCCGGGATGGTACCGTAAATGGT
A_55_P2019362	-1.25921	2.39365	down	Deptor	Mus musculus mammary gland RCB-0527 Jyg-MC(B) cDNA, RIKEN full-length enriched library, clone:G930020B17 product:DEP domain containing 6, full insert sequence. [AK145208]	TGGGCAACATGGCAAGACCTAATGGGAGGGAAGGTGGGTGGGGATGCAATTCCCATATGA
A_30_P01019676	-1.25906	2.39339	down		lincRNA:chrX:123306246-123307974 forward strand	GGAGGAATTCTTTGGAAAACACTACTGGTAGAAAGGAAAGCGTATTAAACATGTTTTTCT
A_55_P1961809	1.25902	2.39333	up	Adra1d	Mus musculus adrenergic receptor, alpha 1d (Adra1d), mRNA [NM_013460]	AGCAGTGTCCCTAAATGTTCCCCAAGACGGGGCAGAGGCTGTCATCTGCCAGGCTTATGA
A_30_P01025931	1.25866	2.39273	up		lincRNA:chr12:113434415-113453161 forward strand	ATTGCTGTCACAATGTCCTTCTGGTGGCTGTGGCAGCTTCATGTTCTCTTTTGACATCAT
A_66_P137660	-1.25827	2.39209	down	Fam166b	Mus musculus family with sequence similarity 166, member B (Fam166b), transcript variant 1, mRNA [NM_177377]	AGAGAGGTGGGTCGGGGAGGGGCACAAAGAAAATGGCTTGGAGGCTGAGCACCTTTTTAT
A_55_P2089520	-1.25798	2.3916	down	Col10a1	Mus musculus collagen, type X, alpha 1 (Col10a1), mRNA [NM_009925]	GCCCGGAGTATTTAATCTACTTGGTATTACGAAGCAATAAAATGACATGAATAGACCTTT
A_51_P474658	1.25671	2.3895	up	Esr1	Mus musculus estrogen receptor 1 (alpha) (Esr1), mRNA [NM_007956]	TCCCCGAAAGGTTCTGAGAATCCCTGCAACATTTTACCCATGTCATGTATGACTAGCAGA
A_51_P237055	1.25632	2.38885	up	Olfr1198	Mus musculus olfactory receptor 1198 (Olfr1198), mRNA [NM_207567]	ATTTTTCTGGGACTTTTCCATAATGAGAATGTCAAAGAAATGTGTGCTGTGTTGTTCTTG
A_30_P01028977	1.25452	2.38587	up		lincRNA:chr8:24331612-24331847 reverse strand	ACTATTCGGTTGAGTAGCAGTAAGCTTTACATAACAAGTTGTGTAAAATGCCTTGGCATT
A_55_P2017169	-1.25415	2.38526	down			AAACCATCCCCTGGAAATTGTCATCGACAGCAGAAACTGGAAACTAAAGCCCACAAGTGT
A_55_P2156461	-1.25404	2.38508	down		Mouse T-cell receptor active alpha-chain mRNA V-region, partial cds, from hybridoma MT1-33. [M34206]	CACTGTCACCGAGGGGTTGCCTGTGAAGCTGAACTGCACCTATCAGACTACTTATTTAAC
A_55_P2011814	1.25351	2.3842	up	Syna	Mus musculus syncytin a (Syna), mRNA [NM_001013751]	ACGTGGACAAGATCCTTCTGCTTCGAGAGTCCCAGTACAAGAGACTTCCCCAAGAGCCCC
A_30_P01026027	-1.25332	2.38389	down		lincRNA:chr7:129294166-129301366 forward strand	ATAAGACATCATGCAGATGAACCATCCAAGAAAAGACAGAGTAAAATCCACACCCCTTGT
A_55_P2047335	-1.2523	2.3822	down	Capn5	Mus musculus calpain 5 (Capn5), mRNA [NM_007602]	GCCTCAGTGTTTGGAGGGCCCCAAAGAATTCCCGTCTTGTGGGGGAGTTTTCTTGCCTAA
A_55_P2118896	-1.25157	2.38101	down	Zfp882	Mus musculus zinc finger protein 882 (Zfp882), mRNA [NM_001166645]	GTCTTTCCTTCTTTGAGGAAGGTTGAAAGTCATGAACAAACTCACAATGGAATAAAATAC
A_55_P2099910	1.25124	2.38045	up	F730043M19Rik	Mus musculus RIKEN cDNA F730043M19 gene (F730043M19Rik), long non-coding RNA [NR_015602]	AGATGCACCTGCCATGTATGGTGAGTTCAATAAATGTTTCTTTCTTTTCTGGCTTAGGTT
A_30_P01018042	1.25115	2.38031	up		lincRNA:chr10:57549604-57549956 reverse strand	TAGCAGTGCTGGGTGGATGCTCTATTTTATTACACTCTCCCAGCTTTAAACAGGCTTGGA
A_55_P1976859	1.25044	2.37914	up	Fbxl20	F-box and leucine-rich repeat protein 20 [Source:MGI Symbol;Acc:MGI:1919444] [ENSMUST00000147971]	TATTCCTCTATATTCTTTGATTGCATCACCCTGAAGTGTGGTGTTGACAGGACCACTTGA
A_30_P01021452	1.25037	2.37902	up		lincRNA:chr10:81165750-81236400 forward strand	TCACTCACCTCACTCATGGTTGACATTTGGTCCCTGTTTAGTTCTTCTCACTGGCTTAGA
A_55_P2099373	1.25011	2.3786	up	Gm12633	Mus musculus in vitro fertilized eggs cDNA, RIKEN full-length enriched library, clone:7420403B16 product:weakly similar to Zinc finger protein 353 [Mus musculus], full insert sequence. [AK135677]	AAACCCAACTATATGACAGAGACCCTGACCATTCACCCTTTTTCCTTTTTCTTTTGTTCT
A_55_P2131964	1.24999	2.3784	up	Pdia2	Mus musculus protein disulfide isomerase associated 2 (Pdia2), mRNA [NM_001081070]	TAGCCATTGGGACACTGTAATCCAGAGAGTGGTGTTCTCAGGTGCTGGAGGGAGCTGTGT
A_55_P2413598	-1.24914	2.377	down	Rab11fip1	Mus musculus RAB11 family interacting protein 1 (class I) (Rab11fip1), transcript variant 1, mRNA [NM_001080813]	GTGTCACCCGGACATCCATGCAGACAAAATATCAATACACATAACATTAAATTTAAAAGG
A_55_P2007876	-1.24832	2.37564	down	Rnf144b	Mus musculus ring finger protein 144B (Rnf144b), transcript variant 1, mRNA [NM_146042]	GAAAACTTCTGAATGGCAACCAGCCCAAATCCTTTCAATCATTTATTAGAAAATCTTCCA
A_30_P01029017	1.24717	2.37376	up		lincRNA:chr13:28947034-28949166 reverse strand	GGCCCTTGAGTGAAATGGTATAATGTTTGCACAGACCCTAGACCAGTGGTTCTTAACATT
A_55_P2005042	-1.24674	2.37304	down	1700091H14Rik	Mus musculus RIKEN cDNA 1700091H14 gene (1700091H14Rik), long non-coding RNA [NR_073362]	TGTCCATGCTCCTCAGGGTATTTCGGAGAGATAATAGAATACACACAGACACCAGACCAA
A_55_P2053251	1.2463	2.37233	up	Gabrg3	Mus musculus gamma-aminobutyric acid (GABA) A receptor, subunit gamma 3 (Gabrg3), mRNA [NM_008074]	TTCCCGACATCCTTCCTGCTGTTCAACCTGGTCTATTGGGTTGGATACCTGTATCTTTAA
A_55_P2060209	-1.2462	2.37215	down	Gm10503	PREDICTED: Mus musculus predicted gene 10503 (Gm10503), misc_RNA [XR_141344]	AATATGAAATGAACAGCCGGAGGTGAGTGGGCAAGCCAGTGACCGGACAGCATCCGTGTG
A_30_P01023745	1.24561	2.37118	up		lincRNA:chr6:66216675-66234475 reverse strand	AGTCTGTGGTGCAGGCCCCTATGAATCCAGTAGATCAACATGTCTGTAAAAAAGAGGAAG
A_30_P01026735	-1.24399	2.36853	down		lincRNA:chr6:145647711-145756861 reverse strand	GAGCTGGAGAGAGCTGGATGCAGGGCTGAGAGGGGGGCGGGCCGAGGGCCAGGGAGGAGG
A_30_P01031930	1.24204	2.36533	up		lincRNA:chr7:49715933-49771497 reverse strand	AAATTGGAGCTTACGTTTACTTACTGCTGTCTTGGGATAATGAGTGCCTGTTTTATACTG
A_30_P01028220	-1.23942	2.36104	down		lincRNA:chr12:110026982-110027450 forward strand	CATAACAATCAAAAAAGAAAAGTACTGCCTAAAGTGCTGAGAAACTTAAGCTGTCCTCTA
A_55_P2085015	-1.23789	2.35854	down	Vsx1	Mus musculus visual system homeobox 1 homolog (zebrafish) (Vsx1), mRNA [NM_054068]	CCTTTGCTTCTTAAGTGCTGCGATCAAAGGCCTGGCCATGAGATCTTGTTTTTTAAAAAA
A_30_P01018238	-1.23762	2.35808	down		lincRNA:chr2:108382077-108441137 reverse strand	GGATCTTACATTCACCATCACTACATCTTCCACCTCAGAAAATTTGTGTTGATAAAATCT
A_51_P308912	1.23469	2.35331	up	Mybphl	Mus musculus myosin binding protein H-like (Mybphl), mRNA [NM_026831]	TCACAGTCCTGGAGCGTTACCACCGAACCAGCTGCGTTGTCTCCAATCTCATTGTTGGCA
A_30_P01030537	1.23457	2.35311	up		lincRNA:chr2:31001736-31006911 forward strand	AATAATTTCTCACCTCTCTGTGTAGGGCTGCAAAAGAGTAATTCCAGAGTTTCCTGCTCT
A_30_P01019608	-1.23294	2.35045	down		lincRNA:chr1:193923014-193923346 forward strand	GGAAAGCTGAAAATTAAAATTGACCAATGGGCTGGAGAGCCCATAAAGGGATTATTTTTT
A_30_P01032022	-1.23263	2.34995	down		lincRNA:chr12:3406750-3425850 forward strand	ATGAACAACATTTCAGACAACTTCAGAATGAATGGTGAAGTTCCTCAGGGGGGTGGGGTA
A_55_P2379719	-1.2324	2.34958	down	D130050E23Rik	PREDICTED: Mus musculus RIKEN cDNA D130050E23 gene (D130050E23Rik), misc_RNA [XR_140717]	GGCCAGCTACTAATCACATGATAACTACCAAGACTTATGTTTTTGTACTTTGATGTTAGA
A_30_P01029385	1.23185	2.34868	up		lincRNA:chr9:43926204-43928496 forward strand	TATGGGAGACGTGTATCCATGGAGAAGTGCCGGCTTCCAGCCCTTTGCGGCTTTTGCAGT
A_55_P1982916	-1.23037	2.34628	down	Bzrap1	Mus musculus benzodiazepine receptor associated protein 1 (Bzrap1), mRNA [NM_172449]	GGGGTGTGGGATAGTGGGGGCATTTGTTTAAAAAGACATTTTACTATAATAAAGTCTATT
A_55_P2179691	-1.23019	2.34597	down	Aknad1	Mus musculus AKNA domain containing 1 (Aknad1), mRNA [NM_177859]	GTTCTTCCTAATTCATAATAAAATAAAAACAATAAAACAAATACTTTATTATTTTTTCTA
A_30_P01032858	1.22978	2.34532	up		lincRNA:chr5:118919606-118925333 forward strand	TATTCCAAGTGTTTCACCATTTCCCCTCTTCCCAGCAGGGAAGGAAAACAATGTTACCCT
A_30_P01024340	-1.22919	2.34435	down		lincRNA:chr17:27012442-27024356 forward strand	AGGCAAGCAAATAAAATTTCCATATTCTTACATCCCAGATATCATCACTTTGCCGCCGCC
A_52_P456243	1.2256	2.33853	up	2900079G21Rik	Mus musculus RIKEN cDNA 2900079G21 gene (2900079G21Rik), transcript variant 2, long non-coding RNA [NR_033431]	TACCACCTCGAGTCCTAGGGATGTTTGGCCAGAGCTTCTGGGTTTCTGGTACTCCGTGCT
A_55_P2037817	1.2255	2.33836	up	Palmd	Mus musculus adult male diencephalon cDNA, RIKEN full-length enriched library, clone:9330200H01 product:palmdelphin, full insert sequence. [AK136939]	TAGGGGAAGGATCGCTCTATTTATGGTCTGAAGTATTGGCATGACACACTAAAAACAAAC
A_55_P2066448	1.22495	2.33748	up	Frmd7	Mus musculus FERM domain containing 7 (Frmd7), mRNA [NM_001190332]	TTCTCCCCAGCACTATGGCAGTGCAACATCAGTGGATGACATACCACTATACATTTCCTT
A_55_P2315012	-1.22433	2.33648	down		RIKEN cDNA 4930458D05 gene [Source:MGI Symbol;Acc:MGI:1923052] [ENSMUST00000142871]	TGTGGCAGTGGTATGGATGACTGCAGACAATGAGAGATGCTAAAGGCTTTTATGACAACC
A_30_P01029293	1.2239	2.33578	up		lincRNA:chr8:72663625-72673010 reverse strand	ACTCACCTTGTGCTGGGCCAGCTCTGGCAGTGAACGGCGCACATGTTCCTGTAGCCGGTA
A_30_P01022934	1.22274	2.33389	up		lincRNA:chr3:131128972-131163308 reverse strand	TAAACAGGAAGTAGTCGGTGGGCGGTAGGACTGTAACGCCTGGCATTCCTGTTTGGCAAT
A_30_P01017908	1.22234	2.33325	up		lincRNA:chr15:102926581-102932542 reverse strand	TATTCCAACACCTCTTCCAGCGACCTGGTCAGGTGTGGCCAATGGAAGCAAGAGCCCAGT
A_55_P1998115	1.22187	2.33249	up	Klkb1	Mus musculus kallikrein B, plasma 1 (Klkb1), mRNA [NM_008455]	AGATATAGTTGCTGAAGACAGCGTTTTGCTCAAGTGTGTTTCCTGCCTTGAGTCACAGGA
A_55_P1986282	-1.22169	2.3322	down	Cdkn1a	Mus musculus cyclin-dependent kinase inhibitor 1A (P21) (Cdkn1a), transcript variant 2, mRNA [NM_001111099]	AATGGAGACAGAGACCCCAGATAATTAAGGACGTCCCACTTTGCCAGCAGAATAAAAGGT
A_30_P01033240	-1.22162	2.33209	down		lincRNA:chr8:47813487-47824869 forward strand	GAATGACTGTGACATTCTGCAAATTAAGGAAAAGACTGTTGGTTTGCAAGGGGGTGGGGA
A_30_P01030610	1.21998	2.32944	up		lincRNA:chr9:75330657-75332641 forward strand	GCGCTGAACTGCTTCCTACTACTTACGTACATCCCTAGCCCATCAAGTCTATCCAAGACA
A_51_P169255	1.21967	2.32893	up	Olfr190	Mus musculus olfactory receptor 190 (Olfr190), mRNA [NM_146397]	CAGGTGCCCTTGTTCTTGTTTTTTCTGGTGATCTATCTCATTACTATTGTAGGGAACCTT
A_51_P369426	1.2192	2.32818	up	Mss51	Mus musculus MSS51 mitochondrial translational activator (Mss51), mRNA [NM_029104]	ACTGTTTACAGCCAACAGGAACTGGAAGCCTCTTTGCAGATTCTGGTGAACTTGGATACA
A_30_P01023848	-1.21897	2.3278	down		lincRNA:chr5:149751979-149808240 reverse strand	AAATACACTAAGGAGCCCAGCCCAGTGAAAGCTACTGGGACTGGGAGTCAGAGCGAAGCC
A_55_P2083198	1.21888	2.32766	up			TTTTTCTCCTATGATTCTGGCTGTAGTCATGTGGCCTTTTGCGAAAGTGGTGGCTGTCTT
A_55_P1996314	1.2174	2.32527	up	Amy2a5	Mus musculus amylase 2a5 (Amy2a5), mRNA [NM_001042711]	GCTGAGGACCCATTTATTGCAATCCATGCTGACTCAAAATTGTAAGAATCTATATTAAAG
A_55_P2029538	1.21649	2.32381	up			CAATTTCTTTGCTGTTTATCCTTTCTTGCTTTCCCAGTGTTTGTTGGGGATCGCCTTCAT
A_55_P2249963	-1.21636	2.3236	down	Gm13205	C0158F04-3 NIA Mouse E7.5 Extraembryonic Portion cDNA Library Mus musculus cDNA clone C0158F04 3', mRNA sequence [AW542521]	AGAATTTTCCTAGGAATGGACCGGAAGCTGGAAGATAGGGAAGGGCGGGTGGATAGATGT
A_52_P22590	1.2142	2.32012	up	Hmcn1	Mus musculus hemicentin 1 (Hmcn1), mRNA [NM_001024720]	TGTCCCTTTTGCCTTAAGGGATGAAAACCTGAAAGGAGTTGTGTACACTACACGTCCACT
A_51_P100347	-1.21162	2.31597	down	Zfp407	Mus musculus zinc finger protein 407 (Zfp407), mRNA [NM_001033341]	CAAATGAAACTCAGAGGATGTATATGAAACACTTTAGAACACAGATGAAAACAAACGCAC
A_55_P1952274	1.2112	2.31531	up	C030016D13Rik	Mus musculus RIKEN cDNA C030016D13 gene (C030016D13Rik), long non-coding RNA [NR_027987]	CCCAACTTATCCTCTGACTTCCATACATGTACCATTGTAAATACACACACAATATGATTT
A_30_P01019225	1.21069	2.31449	up		lincRNA:chr4:59093718-59108018 forward strand	TTGGGATGGACTCCCGTGTGTTTGCTGTACTCTATCCTTTTTCCTCCCAACAGAACTCTG
A_30_P01026647	-1.20981	2.31307	down		lincRNA:chr1:85117750-85129200 reverse strand	ATGGATCAATAAGAGGATGGTAGATGGCAACTTGAGTAATCTGTGGCAAAGTGGGGACCA
A_51_P516148	1.20822	2.31052	up	Trpc4	Mus musculus transient receptor potential cation channel, subfamily C, member 4 (Trpc4), transcript variant 1, mRNA [NM_016984]	GGAGTGTTTACCATACCTATACATATTTTCCATAGTGCTCTGGGCAGGCAAAATGTTTGA
A_30_P01027970	1.20806	2.31026	up		lincRNA:chr13:62580825-62596425 reverse strand	GTTTCTGTAAGAGGAAAGTCATTAGCTTATACTAAATCTGTTAACGTTTGCATGTCACAG
A_30_P01024498	1.20693	2.30846	up		lincRNA:chr13:28506971-28511732 reverse strand	TTTCAGTCTCTGGCCAGGGTCTCTCACAGCCGATGGGGTCTTGGAAGACAGGGTGAAGTT
A_55_P2242510	-1.2059	2.30682	down	4930434J06Rik	Mus musculus RIKEN cDNA 4930434J06 gene (4930434J06Rik), long non-coding RNA [NR_046274]	CACAAGGCAGACTCCCCGGTGTCTTTTATAAGGATATTCACCAATAAAACTAACCAGGGC
A_30_P01018355	1.20577	2.3066	up		lincRNA:chr13:108577843-108679708 reverse strand	AAGGACATATTTTATTGTGCCCATGTTGTGGCACTGTCTTTATACCGCATCCGCAAGCCA
A_55_P2130997	-1.20562	2.30637	down	D830050J10Rik	Mus musculus 16 days neonate heart cDNA, RIKEN full-length enriched library, clone:D830015D18 product:hypothetical protein, full insert sequence. [AK142706]	CTTTCCTGATCTCTGTGTACCAGACACATAGTACACAGATACACATAAATAGATTAAATC
A_55_P2071349	-1.20493	2.30526	down	Trh	Mus musculus thyrotropin releasing hormone (Trh), mRNA [NM_009426]	GGGGTCACATCTTGTATATAACCCTGCTCTTGTTAATCTCAATGACAATAAAATATATCC
A_30_P01026897	1.20469	2.30488	up		lincRNA:chr1:88405875-88418150 reverse strand	TCAGGGTGAAGCACCCTCCTTTCCAGTTCCATTCCTGCCCAGCAAAGATGGGATCTCCTG
A_66_P100268	-1.20347	2.30293	down		Mus musculus 2 days pregnant adult female ovary cDNA, RIKEN full-length enriched library, clone:E330037F14 product:similar to HYPOTHETICAL PROTEIN ORF-1137 [Mus musculus], full insert sequence. [AK087888]	CCTCCTGATATATAATAATCAGAACAACAAATGCACTAAATAAAGATAGAATATTAAAAG
A_30_P01018533	-1.20253	2.30143	down		lincRNA:chr5:15146475-15170100 forward strand	CCAGAACACTTGCCAGAGAGCTTGATTCCTATAAGGGAGGGAATATTGCTAATTTATGCA
A_55_P2126363	1.2014	2.29962	up	Wnt10b	Mus musculus wingless related MMTV integration site 10b (Wnt10b), mRNA [NM_011718]	GGGTGGGAATGGATAATTTATTTTACTGAGATGTGTTCTTGGTTCCTGTTTGAAACTAAA
A_30_P01030288	1.19944	2.29651	up		lincRNA:chr9:41422319-41425855 forward strand	TGGAATGTACAGGATGCAATCATTTTGAAACAACATTTAGAACACAGGGAAGCCATGGTG
A_55_P1969276	1.19926	2.29621	up	Hhip	Mus musculus Hedgehog-interacting protein (Hhip), mRNA [NM_020259]	GCAGTAGCCTTCATCTGTAGGTTAATAGTCTTTTGTCTCTGTTACTTTCTCTTCATAGTC
A_51_P199339	-1.19923	2.29618	down	Tet3	Mus musculus tet methylcytosine dioxygenase 3 (Tet3), mRNA [NM_183138]	CCCTGAAAGGTGGACCTGGGTTCCAAGACAAGTTGTGGAATCCTGTGAAGGTGGAGGAGG
A_52_P621588	1.19904	2.29588	up	Ifnlr1	Mus musculus interferon lambda receptor 1 (Ifnlr1), mRNA [NM_174851]	TATACGTCTTACGTGTTTGTATTACCTGTCTTGCATGTTTGTATTTTTGTCGAAATCGTG
A_55_P1982699	1.1981	2.29437	up	Gm16442	Mus musculus predicted gene 16442 (Gm16442), mRNA [NM_001167148]	TCTCATTTCTTCATAAGGCTTGTCAGTGAGATTTTAACTGCAGTCTTCCCCAGTATCTCT
A_55_P2070045	-1.19784	2.29395	down	Golga7b	Mus musculus golgi autoantigen, golgin subfamily a, 7B (Golga7b), transcript variant 1, mRNA [NM_001141983]	TGGAGGGAGACCTTTTGTTTTATTCTGTTCCCAATAAAAGGACTTGCCAGCTTGAGGCTC
A_55_P2377436	-1.19752	2.29346	down	4930435M08Rik	Mus musculus adult male testis cDNA, RIKEN full-length enriched library, clone:4930435M08 product:unclassifiable, full insert sequence. [AK015326]	GGGGAAAAAGTTGACATCTCTAGCAGTTGGGGTACATAAGATTAAAATGTATTATTCACA
A_55_P2370370	1.19659	2.29198	up	D1Ertd704e	AU018318 Mouse eight-cell stage embryo cDNA Mus musculus cDNA clone J0501G09 3', mRNA sequence [AU018318]	AGGTCACTGCTATTCTGCTGCTTCCAATCTAATGTCTATTTCTGGAACATTCTATGCAAC
A_66_P139615	1.1942	2.28818	up	Gm12409	Mus musculus predicted gene 12409 (Gm12409), long non-coding RNA [NR_046068]	GCACTCCCCGAGACAAGCCTTTCCTGATGGCCTGAACCTGTGGGTGTGATCTTATGTAGC
A_30_P01030753	1.1941	2.28803	up		lincRNA:chr16:43623581-43642715 reverse strand	AGCTTTTTTGTATGTGTGTGTATCCTATTACTTACTTGTTTGCTGGTTTTTTCTTCGGGG
A_55_P2140398	-1.1941	2.28802	down			TTGAAGAGAACAGAGCCCAGGAACTGGACTGGAGACAGAGAAGGTAACAAAATGGTATTT
A_55_P2180435	-1.19284	2.28603	down	Gm10493	PREDICTED: Mus musculus predicted gene 10493 (Gm10493), misc_RNA [XR_141328]	TCACTTCTACATGACAGCCATCCACCGGGAATCCACTAGGTAAATCCATTTAGCATTGTG
A_55_P2127080	-1.19242	2.28535	down	Olfr132	Mus musculus olfactory receptor 132 (Olfr132), mRNA [NM_001005481]	CAAGGAGGTAAAAGAAGCAGTGATAAGACTGTGGTGGAAGACTTGGATTTCACAAAGATA
A_55_P2055423	1.19232	2.2852	up			TTCAAGAAGACAGGCCAGTACTTCAAAAGTATGTTCTGGAGGTTAGTGGATATTTGTTTT
A_55_P1971009	-1.19178	2.28434	down	Gzme	Mus musculus granzyme E (Gzme), mRNA [NM_010373]	AGAACCACGTGGAGTGGGCAGCAAAGAATGAAAATTCACAATAAATAACCTCCAGACTGC
A_51_P363400	-1.1912	2.28342	down	Prg2	Mus musculus proteoglycan 2, bone marrow (Prg2), mRNA [NM_008920]	TGTTAACTTCGGAATCCAGTCCGCTGTCAGGGGAATCAACCAGGGTCAAGTCTGGATTGG
A_55_P1958744	1.19038	2.28213	up	Nsmaf	neutral sphingomyelinase (N-SMase) activation associated factor [Source:MGI Symbol;Acc:MGI:1341864] [ENSMUST00000145399]	AGCGCCTGCCCAATATGGGCAGTGGCACCCTGAACAGGTGGTTCTGGGTTGTTCAAGAAA
A_30_P01026543	1.18901	2.27996	up		lincRNA:chr2:60038543-60046318 reverse strand	CATAGGTCTCATTTTCAGAGACTGCAGTCACTCACAGCTCTTCCAGACTCTGTCCTAGCC
A_55_P2169026	1.18865	2.27939	up			TTTCTGGTTGTATGTGTTGTATGGTGGTGGATGCGCTGCGCAGGTGAGTCGAGTCTCTCG
A_55_P2069022	1.18862	2.27935	up	Vstm4	Mus musculus V-set and transmembrane domain containing 4 (Vstm4), mRNA [NM_178791]	GTAGTTCCCCAAATGGACAGCTGCTTTCATGTTCCATGCAATTAAAGCAAGCATGACCTC
A_51_P412348	-1.18756	2.27767	down	Scnn1b	Mus musculus sodium channel, nonvoltage-gated 1 beta (Scnn1b), transcript variant 1, mRNA [NM_011325]	CCACCCAGCAACTAGTGAACTCAAAACTGAAGAGTTACAACCATTGTCAGTGCCTCGTTT
A_55_P2048961	-1.1873	2.27727	down	Rbmy	Mus musculus RNA binding motif protein, Y chromosome (Rbmy), transcript variant 1, mRNA [NM_011253]	AGACACTTTGCAGTTAAAAGAAATCCATCTTCAAAAAGGGATGATCCCCCTTCTAAAAGA
A_30_P01020792	-1.18726	2.2772	down		lincRNA:chr7:88131123-88136898 forward strand	GAGGACAGCTACCCAAATATGGCATATACTCATACAAACACATAAACAGAAAGAAAATCT
A_30_P01029051	1.18726	2.2772	up		lincRNA:chr13:60508775-60534625 reverse strand	ACTTTCTTTGCATCATCACTGGAAATTCCTTGTGTGAGTGAGGAACTCCTGTCAGTGGGA
A_66_P118139	1.18665	2.27624	up	Gm11669	PREDICTED: Mus musculus predicted gene 11669 (Gm11669), misc_RNA [XR_168617]	GTGGCCTTGGGTTCATCCATCAGCTTCATTCTGAGTCTGTAATCTTTCATGTTGAAATAT
A_30_P01028201	1.18429	2.27251	up		lincRNA:chr2:128249388-128250301 forward strand	ACTTCCTGCCCAAGAACAGTACAACTGTGAGAACAGAACCCGTTAGCCGTTTGAGAGCAA
A_30_P01020601	1.18253	2.26974	up		lincRNA:chr13:78370478-78371404 forward strand	GGGTCACAGGCTTTTGATCAAAAGTTTGTCTTTCTAATGTTCTCCTATGTGATTACATTA
A_55_P1978293	-1.18214	2.26914	down	Micalcl	Mus musculus MICAL C-terminal like (Micalcl), mRNA [NM_027587]	GAGGAAGCTGGAAAAGCAGTCAGCTAAGCAAGAAGAATTGAAAAGACTCCATAAGGCTCA
A_55_P1998702	-1.18201	2.26892	down			TATTTGTTTATCTTGTTCATTATTCTAAATCACTATGATAAGTGTTGTGACATAGTCTGA
A_30_P01028746	1.17891	2.26406	up		lincRNA:chr13:99465269-99472596 reverse strand	TTTGTGTCACGTTGCCACCTGTGTAGACACCTCCGGCACTCACACCATGAAGAAGAGCCC
A_30_P01028399	1.17682	2.26079	up		lincRNA:chr13:60508775-60534625 reverse strand	CAAATTGACTTGGCTAAGACCCATGCTCAGGAGCCTTCATCTCCCCAAGGAGAAAGTGAG
A_30_P01018326	-1.17655	2.26036	down		lincRNA:chr14:65433420-65434061 reverse strand	TCACTCATCTCTGAAAATGGGCACCAGAAAAACAAAACCAAAGTTCTCAGGGTGGGTAGA
A_55_P2104076	-1.17631	2.25999	down	Gm6696	predicted gene 6696 [Source:MGI Symbol;Acc:MGI:3646688] [ENSMUST00000098887]	TACTGAGGCCACTGATGCTGGGGCCTGATGAACATTTCTCAATAAATTGTTCACAATATG
A_55_P2075657	-1.17382	2.25608	down	5330426L24Rik	PREDICTED: Mus musculus RIKEN cDNA 5330426L24 gene (5330426L24Rik), misc_RNA [XR_168729]	TAAGACAGATGATGATCCCAGAGCTACTAATAAAACAAAAAGGGGGAGATGCGGGAAGCA
A_55_P1964596	-1.17375	2.25597	down	4932411N23Rik	Mus musculus RIKEN cDNA 4932411N23 gene (4932411N23Rik), mRNA [NM_177705]	CAAGAACAAGAAGAACAAGAAGAACAAGAAGAACAAGAAGAACAAGAAGAACAAGAACAA
A_55_P2088765	-1.17342	2.25545	down	Sox5	SRY-box containing gene 5 [Source:MGI Symbol;Acc:MGI:98367] [ENSMUST00000111746]	CTGGGCCCATGGGCAAATTCAATCAGATGCACACACAGAGAGAATAAAAAGAGAAAAATA
A_55_P1956798	1.17169	2.25275	up	Smpx	small muscle protein, X-linked [Source:MGI Symbol;Acc:MGI:1913356] [ENSMUST00000112520]	AAGAGAGGATAGGGCCTTTCAAGTTTCTGATCACCTATCATTTTCGTCAGTGGCAAGGCT
A_55_P2078143	-1.17164	2.25268	down	Otop1	Mus musculus otopetrin 1 (Otop1), mRNA [NM_172709]	CACCAGCACTCACATGCAAGAGTGTGCTACCCCCATGAATAATAAAAAATAATAATAATA
A_30_P01033130	-1.16862	2.24796	down		lincRNA:chrX:150159252-150181275 reverse strand	TTCAATGGGTGAACTATTTTACAAACGCACCAAGGAAATGAAGCCATACTGCAGTCCCTC
A_55_P2113391	-1.16842	2.24766	down			TCAGAGCCCAAACCATCTCCCAAACCTGTAAGTGCATATTGCTTTATAAACAGTAAATAG
A_30_P01030549	-1.16795	2.24692	down		lincRNA:chr8:12278818-12280657 forward strand	ATGTTTGTTAGGATGTCATGTGGAAGTGTGAAGGATGGGAAGCAACCATAAAACCCTGCC
A_55_P1958758	1.16794	2.2469	up	Olfr965	Mus musculus olfactory receptor 965 (Olfr965), mRNA [NM_001011859]	ACTGTTGTGCCCATGCTGAACCCGTTGATCTACAGTCTGAGGAATAAGGATGTCAAAGTT
A_55_P2026487	-1.16775	2.24661	down	Stab2	stabilin 2 [Source:MGI Symbol;Acc:MGI:2178743] [ENSMUST00000099390]	TATAATGCCTGACTCTGGGAACAAGCAAACAATCCTGAAAATTCAGAAAACACCAAAAGC
A_30_P01022873	-1.16728	2.24588	down		lincRNA:chr11:52463475-52485075 reverse strand	GGAAAGTCCTCTATTTCCATAACAGCCCTGTTTGGGCCAATATACCCTCCAACCAGCAAG
A_30_P01018298	-1.16584	2.24364	down		lincRNA:chr10:66559716-66647841 forward strand	TCATAGATGTAGGAAAACATCTCAAGCTACAGAGAGGAGAATCAGTGTGAAGGAATAGAT
A_30_P01030668	-1.16518	2.24261	down		lincRNA:chr4:59093718-59108018 forward strand	ATCTCCAGCTTAGTCTCCTGAGAAGACAGACCATTATGACACAAATACGCCTTCAGATGC
A_30_P01025810	1.16413	2.24098	up		lincRNA:chr13:31736054-31781679 reverse strand	ACAATCTGCTTGCAAGAGGTGGGCTTGGGAGGAAGCTCTTCTGCTCTGGCTGATGGCCAT
A_55_P2127238	1.1638	2.24046	up	Phc3	polyhomeotic-like 3 (Drosophila) [Source:MGI Symbol;Acc:MGI:2181434] [ENSMUST00000099163]	GGGCTGGAGCCGTTTCCTGTAAGTCAGAAGCTTATTTGTGTTTTTAAAATTATTTTTAGT
A_30_P01017683	1.16344	2.23992	up		lincRNA:chr14:61321789-61325711 forward strand	TTTAAGAGACCTGAACAACTCTGGAACTCATGGATGTGGTCAACTGCCTGTTCTTCCAGT
A_30_P01028651	1.1634	2.23984	up		lincRNA:chr6:37732925-37784092 reverse strand	TCATTTCATCTGTTGTCAGTGTCCTGGCTGGAGTGAGTTTATGACTGGTCATGTCTTTCC
A_30_P01029880	1.16327	2.23964	up		lincRNA:chr16:29804864-29815614 forward strand	TCATGTTGATCACATACTTCTTCCTTGGTCAAGTTTGAGTGCTCCTGGTGGCAAGAACCA
A_55_P2019631	1.16058	2.23548	up	Col19a1	Mus musculus 2 days neonate sympathetic ganglion cDNA, RIKEN full-length enriched library, clone:7120487B09 product:procollagen, type XIX, alpha 1, full insert sequence. [AK149136]	TATCCGTTTCCTGGAGGGGCAGCTCCTGTTGACAGTACACTTAAGTTAAATTTTCTGTTT
A_55_P2157469	1.1603	2.23504	up	Gm10864	PREDICTED: Mus musculus predicted gene 10864 (Gm10864), misc_RNA [XR_141280]	TCTCTGAAGGAGATGTGAAGCCCTTGGACCTCTCTGAGCTGGAGGGACCTCCAAGGCTAT
A_30_P01032003	1.15962	2.23399	up		lincRNA:chr13:107822042-107823753 forward strand	TAGGCCTGTGCAGTGTAGCCATTTCAGGACTACTACAGAAGTTGTTTTGTGAGTGGTAAG
A_55_P2150003	-1.15803	2.23152	down	Gnat3	Mus musculus guanine nucleotide binding protein, alpha transducing 3 (Gnat3), mRNA [NM_001081143]	TTTGATGCAGTGACAGATATAATAATAAAAGAGAACCTCAAAGACTGTGGGCTCTTCTGA
A_55_P2002205	1.15795	2.2314	up	Bre	brain and reproductive organ-expressed protein [Source:MGI Symbol;Acc:MGI:1333875] [ENSMUST00000114514]	CAGAACTGAGAAGAAAGGCCTTTTTAAAGTTCCCCAATTGAGATTAATTTCTAGTCATAC
A_66_P117534	1.15789	2.23132	up	E030025P04Rik	Mus musculus RIKEN cDNA E030025P04 gene (E030025P04Rik), long non-coding RNA [NR_037978]	ACAACTTTTGTAGGCCATCTCATTCCTACCTTCCATACTGATGTGCTGTCCCCATCAAAC
A_55_P2168497	-1.15758	2.23082	down	Slc9a1	Mus musculus solute carrier family 9 (sodium/hydrogen exchanger), member 1 (Slc9a1), mRNA [NM_016981]	GGACAAGGAGGAAGAGATCCGCAAAATCTTGAGGAGCAATCTGCAGAAAACCCGGCAACG
A_55_P2119234	1.15705	2.23001	up	Six2	Mus musculus 12 days embryo eyeball cDNA, RIKEN full-length enriched library, clone:D230050D09 product:sine oculis-related homeobox 2 homolog (Drosophila), full insert sequence. [AK142139]	ATTGTCTGAAAGTCTGTCTGGAGAATTCCAAACAGAATTCTCCTGTGTCAGCCCACTTGG
A_30_P01024458	1.1562	2.2287	up		lincRNA:chr9:41422319-41425855 forward strand	AGCAATGGGTTGGAAGTTGAAAGGTGAGGAACCCAGTTAAATGTCCACAGAATACCGCTT
A_66_P104661	-1.15601	2.2284	down		RIKEN cDNA 4930579C12 gene [Source:MGI Symbol;Acc:MGI:2441687] [ENSMUST00000098484]	GTGGGCTCCAGAAAACGCCGGAACATATTTACAATCATAAGAAATATCCATCACCAGAAT
A_55_P2129916	-1.15598	2.22836	down	Gm14812	Mus musculus predicted gene 14812 (Gm14812), long non-coding RNA [NR_033544]	AGTGGCTTGACAATCCAACAGACACCGTTTACACGTGGCTGTTTGCCTCTCGTCAGATAA
A_30_P01019685	1.15576	2.22802	up		lincRNA:chr17:21177225-21187525 reverse strand	TACCGCTCAAGTTGGTAAACCTTTTCTTCCCGAAGCTCTTCCTGGGAATGGGTAACACGC
A_30_P01028037	1.15473	2.22642	up		lincRNA:chr11:120041124-120052299 reverse strand	ATTGAGAAGTGGTTGGTTTGATACATCCATATCAACAGAACTTAGGGCCCTGTGGCTGCT
A_30_P01031162	1.15396	2.22524	up		lincRNA:chr8:49237358-49246495 forward strand	TTTAGCCTGCTGCTCAGTCAGGACTCTTAAGAGCCTCATTGTCCCGGAGTGGGCTTCCTG
A_55_P2102306	-1.15349	2.22452	down			AAACAGGACATAGATAGAATCTCTGGAATGAAGTCTGAGGGAGAAACAACAAGTTTGGGG
A_55_P2103033	-1.15204	2.22228	down			ACATGTAAAAAATTAAATTACATTCAAATTATCAGCATCCCCAAATACATTGTTATTATT
A_55_P2070794	1.15165	2.22168	up	Tyw1	Mus musculus tRNA-yW synthesizing protein 1 homolog (S. cerevisiae) (Tyw1), transcript variant 2, mRNA [NM_178897]	TATATGTAAGACCCTGTCTCAAACAAAGCTCCCATGTAGACTTCCTGAAGGACAGGGTAG
A_55_P2000454	1.15113	2.22088	up	Tspan18	tetraspanin 18 [Source:MGI Symbol;Acc:MGI:1917186] [ENSMUST00000181716]	GTTCTGGGTCCTTTACTCATTCCATGCCTTGATGGTCAAGATTAAATGAAACCTATGAAC
A_55_P2145125	1.15019	2.21943	up	Btnl9	Mus musculus butyrophilin 3 mRNA, complete cds. [AY177687]	ACAGCTGTGTTTATGTTCTGTTCATACCTGGCTAGAGAGGCTCCCACTGAAGATGTAACT
A_30_P01032046	-1.14985	2.21891	down		lincRNA:chr1:72291663-72291749 forward strand	GTAACCTATAAATAATGATTCACTGACAGAAGTTGTGTCAGAGTCCTAGATTCTTCTGAA
A_55_P2187829	1.14978	2.21881	up	5430402O13Rik	Mus musculus 13 days embryo head cDNA, RIKEN full-length enriched library, clone:3110047M22 product:unclassifiable, full insert sequence. [AK014187]	AATATCGTTTCTTTGTGGAACAGAAGATACCATTTTTCGTTTATAAACGAGTTGGCTGTG
A_55_P2169046	1.14889	2.21743	up	Olfr458	Mus musculus olfactory receptor 458 (Olfr458), mRNA [NM_146444]	GTGGTCTTCTATGCTGTAGTCACCCCCATGCTGAATCCTCTCGTCTACAGTCTGAGGAAC
A_55_P2158966	1.14739	2.21513	up	Dixdc1	DIX domain containing 1 [Source:MGI Symbol;Acc:MGI:2679721] [ENSMUST00000117093]	AACAGCGTCGGGAAATACCTAAAAGTACTTGCCCTGGTTAATCTACGTGTTGGTCAATAA
A_30_P01023446	1.1473	2.21498	up		lincRNA:chr10:5950116-5958250 reverse strand	TTTGGCTGGCCAGCCGCTGGAGCCTAAATAAAGTGACCATTTCAGGAAACAAGGTGAAGT
A_30_P01031193	-1.147	2.21453	down		lincRNA:chr1:153685487-153710962 forward strand	AAACACAAATTAGGATAACCTCACACATTGAGCTGGCAAACACTGAGAGTGACCACGCTG
A_55_P1983380	1.14686	2.21432	up	Gm2022	Mus musculus predicted pseudogene 2022 (Gm2022), mRNA [NM_001177574]	TGTTAAGGGACTGCCATTCCATTTGTGACCTTTCATTTGTAGCCCTTGTTGTATACCCTC
A_51_P507051	-1.1465	2.21376	down	Bhlhe22	Mus musculus basic helix-loop-helix family, member e22 (Bhlhe22), mRNA [NM_021560]	TTCCAAAAGGGGACCTATTTGCATTCCAAAACAGAAAAACATCACAGCAATAGATTTTAC
A_51_P225634	-1.14577	2.21264	down	Zdhhc25	Mus musculus zinc finger, DHHC domain containing 25 (Zdhhc25), mRNA [NM_027306]	GCTCCCTGAAGGAAACCAACATGGCAGAATACAAAGTAATATACCTCAAATTTTCTTGTG
A_66_P102025	1.14539	2.21206	up	Gm4123	Mus musculus adult male hypothalamus cDNA, RIKEN full-length enriched library, clone:A230086K09 product:unclassifiable, full insert sequence. [AK039021]	TACCTAATCGCTAAAATTTTGCACTTTTTGGCTACTTCACTAACGAATTCGAGGTGAAGG
A_51_P130497	-1.1452	2.21177	down	Zcchc13	Mus musculus zinc finger, CCHC domain containing 13 (Zcchc13), mRNA [NM_029158]	GCGAGAGACAACTGACTAAAATAAGAAGAGAAACTACTTCCTTGGTGGTGGGGGCAAGAA
A_52_P217796	1.14488	2.21128	up	Ift46	Mus musculus intraflagellar transport 46 (Ift46), mRNA [NM_023831]	GGACCTCATTGCACAGGCTTGATTGACTCCAGGACAAATACGTAGAAATAAAACCAGACC
A_55_P1974209	1.14127	2.20575	up	Kif4-ps	Mus musculus kinesin family member 4, pseudogene (Kif4-ps), non-coding RNA [NR_033653]	TGTGCCACTCCCAATACAAAGCTTCTTAAAGAGATGTGTGATATGGACCAGGCTCTGTTG
A_30_P01025782	1.14125	2.20572	up		lincRNA:chr8:10886200-10905925 reverse strand	GTCAGAAAGTGAGGAAGGGCCATTCCCCTGCTACCTGGAATGGCTGCTGTCCTATTTCTG
A_55_P2025635	-1.14041	2.20444	down			GACATAAAATTTTTAAATTATACTATAAATATTTTAAAATAAAAAACTTAGAGTGGGTGG
A_55_P2001486	-1.14029	2.20426	down			GGGCCTGATTACAAAGTTGTGATAAATTTAAAACAAACCCGATACCTACCAGTCATATTT
A_30_P01030130	-1.13976	2.20345	down		lincRNA:chr15:79764481-79809909 reverse strand	ACAGAAAGCAGGAGCAGGTGAAGAACAGGACGGGACGGGAAGCTCTCTGTGTCATCGACT
(+)E1A_r60_a104	1.13854	2.20158	up		Unknown
A_30_P01020691	-1.13841	2.20138	down		lincRNA:chr13:26649529-26838004 reverse strand	ATAATCTGGAGAATGAGATGTTCCTCTGGGAGGATTTAATGCTGGGGGGTACAAGTGTTC
A_30_P01027508	-1.13695	2.19916	down		lincRNA:chr2:158169020-158191295 reverse strand	AGTGACTGGCTTTGGAGGACCTTAAGGAACAGAAGTACTCTGGGTGGGGTGGAAGAGAAG
A_30_P01029972	-1.13615	2.19794	down		lincRNA:chr10:62812866-62831016 forward strand	AACTTAAAACAGCTTTAACCAGCAAAACAATGGAAGGCTCAGCTGGCTTTGCCTTGCCTG
A_52_P419373	1.13444	2.19534	up	Lrrc39	Mus musculus leucine rich repeat containing 39 (Lrrc39), transcript variant 2, mRNA [NM_175413]	AGCATAGGTTTCAACCAAACATCGTAATGCAACATCTGCAAACACAATCATGTGCCCCCA
A_30_P01023147	1.13404	2.19472	up		lincRNA:chr13:54399275-54445825 reverse strand	TGTTGATTGAACTATTTTCCAGCGTCTTGTTTCCCAACATTTCCCCTGGATTCTTGTTTG
A_30_P01029690	-1.13348	2.19387	down		lincRNA:chr16:45016828-45069177 forward strand	GATAATGTCAATTTCACCGAGGCTCACTCTCACTCCAAACAGTTTTCCTTTCCTAAAACT
A_30_P01026955	-1.13192	2.1915	down		lincRNA:chrX:92139043-92140820 reverse strand	TAAATATACACTTAAATGTGAAAGCCAAACACAAAAACCCCACTACAACACTCTTCTAAA
A_55_P2101419	1.13029	2.18903	up		PCX3_MOUSE (Q8VI59) Pecanex-like protein 3, complete [TC1601007]	AGTTCATCACTTGTCCTGTGTCTGTTACTTTAAGAAAGCCTATGTCATCCTGTTCGACTA
A_30_P01017793	-1.12817	2.18581	down		lincRNA:chr2:71205705-71226510 forward strand	CACCAGGGAGTCTGGTATTTGAATACCATCGTAGAGGTAAATAGCAAATTATCCTCTGGG
A_55_P2150476	-1.12769	2.18508	down			GCAAAGGCACATGCTGTGTATATTCATACGGTGTGGGGAGTGGGGTTTAGATTTGATTAA
A_55_P1964871	-1.12714	2.18426	down	Gm5549	Mus musculus predicted gene 5549 (Gm5549), mRNA [NM_001270430]	TGTCCGGAAGAGGAAACTTGTGCAATGAACAAAGAATCAAAATCTTAGAAAGAATCATGG
A_30_P01025248	-1.12706	2.18413	down		lincRNA:chr4:3745750-3756200 reverse strand	GATTAAACCCAAACCAGAAACACAGAGATGGACAAAAGACAACCAGGCACCCAAACTTAC
A_30_P01025154	1.12558	2.1819	up		lincRNA:chr9:41184479-41240162 forward strand	ACCATCGAAGCATCGAAACCCTAAGGCTACTTGGAGAGAAGAAGACTGTCCCTGGAGAAG
A_55_P1983011	1.12493	2.18091	up	Mdga2	Mus musculus MAM domain containing glycosylphosphatidylinositol anchor 2 (Mdga2), transcript variant A, mRNA [NM_001193266]	GTTCATATATGGCTTTTTCCAGTTATCATCCTCATCTCTATCTTAAGCCCTCGAAGGTGA
A_55_P2141729	1.12453	2.18031	up	Snrnp27	small nuclear ribonucleoprotein 27 (U4/U6.U5) [Source:MGI Symbol;Acc:MGI:1913868] [ENSMUST00000113683]	AATGCTGGTGATTCTAGGCACACACCATCACACACAAATAAAATATTGCCATTTGAAAAG
A_55_P2108609	1.12346	2.17869	up	Srgap3	Mus musculus SLIT-ROBO Rho GTPase activating protein 3 (Srgap3), mRNA [NM_080448]	GTGACACCCACGGAGAAGATGTTCCCTAATAGCTCCTCGGACAAGTCTGGCACCATGTGA
A_30_P01033063	-1.12268	2.17751	down		lincRNA:chr14:55672705-55675212 forward strand	AAGATGACTCTGTGGAGGACACTCTCCGTTATCTGTGATGACATACACCAGCCCCCGAAC
A_55_P2016174	1.1224	2.17708	up	Olfr586	Mus musculus olfactory receptor 586 (Olfr586), mRNA [NM_147111]	TTGCTTGTGCCTCCTGTAATGAATCCTATCATATACTGTGTGAAGAGCCAACAGATAAGA
A_30_P01031132	-1.12221	2.1768	down		lincRNA:chr3:126989696-127112471 forward strand	GAAAAACACATCACATGAAGAACAAACCAAAATCGGGGCTGGGGACCATCTTGAACATCG
A_55_P2026930	1.12155	2.1758	up	Inpp5e	Mus musculus inositol polyphosphate-5-phosphatase E (Inpp5e), mRNA [NM_033134]	CACGTAAACTAGTGCAGATGAAGTGGGAAATTAAAACTGGACTTGTAAATAATTGTGAGA
A_52_P65084	-1.12126	2.17536	down	Barhl1	Mus musculus BarH-like 1 (Drosophila) (Barhl1), transcript variant 1, mRNA [NM_019446]	CTACACGGATTGACTTAAACCCAGGGGATAAGTGCTTTAAATTAATCTCATTGAATAAGA
A_55_P2167152	1.11989	2.1733	up	Hdhd2	Mus musculus haloacid dehalogenase-like hydrolase domain containing 2 (Hdhd2), transcript variant 3, mRNA [NM_001039202]	CCTGGACTGGATTTGCATTTTTGCTCTCCTATTAATATGAGAGCACAAAGTTCTTAATTT
A_30_P01025550	-1.11798	2.17043	down		lincRNA:chr4:130039725-130069550 forward strand	TTTCTGGAGGATTATACATACAGCTACTGTCTGTAGGAAAACTAGGAAGTACTGTTTTCT
A_30_P01020086	-1.1163	2.16791	down		lincRNA:chr14:99752098-99752425 reverse strand	CGGGGTGGGGGGTGTTGTAAGCCACATGAATCAGAGTAAGACTCTCCTTGGCTCAATGAA
A_55_P2272979	-1.11425	2.16483	down	Tdrd5	tudor domain containing 5 [Source:MGI Symbol;Acc:MGI:2684949] [ENSMUST00000148277]	TCTCCTTAACAGTCGCCAAGACCGGAAATGTAAATGAGCTAAATACCTAATAAAAAATGT
A_52_P1135722	1.11406	2.16455	up	Gm684	Mus musculus predicted gene 684 (Gm684), mRNA [NM_001195681]	ATCTTCCGCAGGACTGTATTTTGAGCCTGAACCAACGTCTTCCACACCCAGTTATTTTCA
A_30_P01022591	1.11332	2.16343	up		lincRNA:chr15:102920547-102933472 reverse strand	CATACTCTGGAAATAAACTGTGGAGAAGGTCAGTTATAAATCTCTATCTATTACTACCCC
A_55_P2020188	1.112	2.16146	up			CCTCAGGCTCTGCTGTAGGAAGCCAAGGAAAGATGCTTGCTGCTGACCGGATGGTGCTTT
A_30_P01026970	-1.11084	2.15972	down		lincRNA:chr6:117528735-117562588 reverse strand	AACACAGAATGTAAAGAAGATGAAACAGAAAACAGACCTGAGGCTTCCAGGCTGTCCACG
A_55_P2091751	1.11008	2.15858	up		predicted gene 11716 [Source:MGI Symbol;Acc:MGI:3649215] [ENSMUST00000154414]	GTATCACTGGGAAATTATGTGCTGGTGTCTCCCTTCAAATAAAGTTTTATTGAAACACAA
A_52_P635105	1.1097	2.15801	up		phosphatidylinositol glycan anchor biosynthesis, class B [Source:MGI Symbol;Acc:MGI:1891825] [ENSMUST00000093819]	ATACTCCTTTATGCTCTTAAGGTAACCTTTCACATCATCAACAAAGTCGGCGAAGAGCTG
A_55_P2130024	-1.1088	2.15666	down	AY761184	Mus musculus cDNA sequence AY761184 (AY761184), mRNA [NM_001007582]	CCGAAGCTGCCATTGTGCAAAGAAAGGCAAAATAAAAGTGCAATCACCACCCAAGCTCCA
A_51_P469688	-1.10721	2.15428	down	Syt17	Mus musculus synaptotagmin XVII (Syt17), mRNA [NM_138649]	AAACGCCAGCCTAGTATTCACAGTGTTCGGCCACAACATGAAAAGCAGCAATGACTTCAT
A_55_P2089060	-1.10713	2.15416	down	Slc7a14	solute carrier family 7 (cationic amino acid transporter, y+ system), member 14 [Source:MGI Symbol;Acc:MGI:3040688] [ENSMUST00000108245]	TGATGCAAATGCATGCTATTCTCAAAACTCACTTCACTGACTTCAAGAGCCCATGCTTCC
A_30_P01018445	-1.10704	2.15403	down		lincRNA:chr8:124355710-124401160 forward strand	AGAAGCTTGTCACCTATCACGGCTCTGATTCTACCACTGTGAGGACAGCAGGGGGCAGCT
A_55_P2107978	-1.10527	2.15139	down	Gm1140	Mus musculus predicted gene 1140 (Gm1140), mRNA [NM_001126317]	GTCATGTGACATACATAAAACATTCCATACACTACCAAATATTATGGTAGAAATTGGCCC
A_55_P1980144	1.10342	2.14864	up		predicted gene 8098 [Source:MGI Symbol;Acc:MGI:3645749] [ENSMUST00000146985]	GGGTGTTTTCCTAGCAGAGTTTTTGCACTACTTTGCTGCTGATTTTATTGTAATTAACTT
A_55_P2168441	-1.10272	2.14759	down	Fam163b	Mus musculus family with sequence similarity 163, member B (Fam163b), mRNA [NM_175427]	ATGGGACTTGCCAGGGACCCACACAGCACCCTGAAAAAGCAAAAGCCAATAAATTTGTTT
A_55_P2117908	1.10271	2.14758	up	Pax9	Mus musculus paired box gene 9 (Pax9), mRNA [NM_011041]	CCACACCTGTATATTTATTCTAAATCAACCTGAACTTTCGAAACGTGCAATTGTTGAGAT
A_30_P01028067	1.10234	2.14703	up		lincRNA:chr1:94608820-94634671 forward strand	TATCCAGAATAGGACCCCTCTAGCTGTAAGGGCTCTGAGGACCAAGGATGTGAGGGAGGG
A_30_P01030188	-1.10141	2.14564	down		lincRNA:chr8:74333475-74384150 forward strand	AGCACTACCTACAAAACTCACACACCATTCAGTTTTTTAAAAGTTCCTAATTGAGCCAGT
A_30_P01029615	-1.10104	2.1451	down		lincRNA:chr2:94008913-94019798 forward strand	AAAGCAGACAGGCAACACCCACATAAACACGCTTGCTAAAATTTTGGCTCTCTCCTAAGC
A_55_P2149011	1.10078	2.1447	up	Hif1a	Mus musculus 8 days embryo whole body cDNA, RIKEN full-length enriched library, clone:5730564B02 product:hypoxia inducible factor 1, alpha subunit, full insert sequence. [AK017853]	CCTAATCTGTTACTACTTGTGTGTAATTGTCAACTTGATGTTTCTGCCTACACCATTTTC
A_55_P2026710	-1.10016	2.14379	down	4930445E18Rik	PREDICTED: Mus musculus RIKEN cDNA 4930445E18 gene (4930445E18Rik), misc_RNA [XR_168734]	AGCATCTCGCACAGGGAGGAGGCTCAGAAAACATTTGTCAGAAGAAGAATGAATAAATAA
A_30_P01029992	1.09994	2.14346	up		lincRNA:chr16:29804864-29815614 forward strand	TACAAGCTTCTTTGTGGTCTTCTCTGACCTCACAGAGAACAGACCTCACCTTTATCTTGG
A_55_P2328092	1.09949	2.14278	up		RIKEN cDNA D630011A20 gene [Source:MGI Symbol;Acc:MGI:3642132] [ENSMUST00000180858]	TGTGTATGACCCTTTATGTGGATCACACAGGGGCTTGTCTGTCATTATATCACTGATTCC
A_55_P2057577	-1.09882	2.14179	down	Ugt1a6a	Mus musculus UDP glucuronosyltransferase 1 family, polypeptide A6A (Ugt1a6a), mRNA [NM_145079]	CATTTCAGATTCAAGCTATATATTCTGACCAAAAGTTCCAAAAGTTCATGTCCATTTCGC
A_30_P01028440	1.09792	2.14046	up		lincRNA:chr10:96096995-96097589 forward strand	GCTGGGGTTCCAAGTGTGCTCCACATCTTCCTGCAGTGTGATGAGAGGTGAGAGCAAGGA
A_55_P2129077	-1.09699	2.13908	down	Gm5464	Mus musculus predicted gene 5464 (Gm5464), mRNA [NM_001034881]	GTTAAAACTGATTTATCTGCTCTGGCTGGAGCTTAAGAGAGTATTTGGCACATAGAAGGC
A_55_P2338776	-1.09683	2.13884	down	A930027P06Rik	Mus musculus adult retina cDNA, RIKEN full-length enriched library, clone:A930027P06 product:unclassifiable, full insert sequence. [AK044624]	CTCTTTGGGGGCTTATGATGGATAAGGGGATAGAGGAACTCATAAAGGAAAAAATAAAGC
A_30_P01023877	1.09625	2.13799	up		lincRNA:chr6:121040274-121040713 reverse strand	GTAAGATTGGTTCTATAGAAAGCTACTCAAGTAGGGCTTGTGACAGTTGAAATAAGCCCG
A_55_P2307578	1.09553	2.13692	up	E530011L22Rik	Mus musculus RIKEN cDNA E530011L22 gene (E530011L22Rik), long non-coding RNA [NR_033503]	CAGGCTCAAACTCAGCATGTATTTTCATTTCTACAAGATCCTTTTCAAGTTGTAGAGAAA
A_30_P01029502	1.09387	2.13446	up		lincRNA:chr5:52461266-52541416 reverse strand	TTTCCTCGTTTTATTTGCATCCAGAGCATGGCGGGCTGCGGGCTGTCGGAAGACACCTTC
A_30_P01023148	-1.09368	2.13418	down		lincRNA:chr6:120670699-120677449 reverse strand	CCAAAGATGGTCCAAAGGTTTTAAAAAACAACAACAACAACAAAAACCCAGCCACTTCTG
A_30_P01025337	-1.09362	2.13409	down		lincRNA:chr6:148162552-148176577 reverse strand	AGCAGGGTGGCTATGAGTCAACCCATAGACCTCCTTGCACTGTCAGGGGGGAGTGGGGAG
A_55_P2375194	1.09349	2.1339	up	P2rx3	PREDICTED: Mus musculus uncharacterized LOC100862344 (LOC100862344), misc_RNA [XR_140553]	GCCTTCTTCTCTGTTAGAATATAACATGCTGAATGGGACTTAATGAAATTCCTCCCCTTC
A_55_P2108094	-1.09258	2.13256	down		RIKEN cDNA B020018G12 gene [Source:MGI Symbol;Acc:MGI:3612447] [ENSMUST00000104983]	CAATAAGCCTAAATCAAAGGAAAAAAGAAAGTAGAATAATAAAATAAAATAAAAATATAG
A_55_P2306784	-1.09191	2.13156	down	AU015558	AU015558 Mouse two-cell stage embryo cDNA Mus musculus cDNA clone J0713E05 3'. [AU015558]	AGGAAGGCCAAGCTAGTCATTTTTAAGAAACCCAGTATTCCAGCAATAGTGCTGCATGCT
A_55_P1996683	1.09094	2.13013	up	Itih1	Mus musculus inter-alpha trypsin inhibitor, heavy chain 1 (Itih1), mRNA [NM_008406]	ATTGACTGCATCCTGTTCTCTTCTTGGCACATGGCCTCTGAATCCCTTGAATAAACCCTT
A_51_P358953	-1.09036	2.12927	down	Zfx	Mus musculus zinc finger protein X-linked (Zfx), transcript variant 1, mRNA [NM_001044386]	TAAGAGATGTAGAACGAGATTTCGGCAACAAAGTGAGCTTAAAAAGCATATGAAGACCCA
A_55_P2103075	1.09007	2.12885	up	Mid2	midline 2 [Source:MGI Symbol;Acc:MGI:1344333] [ENSMUST00000140144]	TTCATCAGTAAGTCATGGTGTAGTTGGGGCCTGTGGCCAGAGATAAGGAAATGTAAGGAA
A_30_P01020572	-1.08977	2.1284	down		lincRNA:chr12:109603526-109647403 reverse strand	CGCCGTCCGACATGGTGGGGGAGATGGGCAGCCAGCTGGCCACCAGCCTGCGGGGACACT
A_55_P1952240	-1.08886	2.12705	down	Slitrk2	Mus musculus SLIT and NTRK-like family, member 2 (Slitrk2), transcript variant 1, mRNA [NM_001161431]	CAATCGGAACCAGACTACCTCGAAGTTCTGGAAAAACAAACTGCAATCAGTCAGCTGTGA
A_30_P01024071	-1.08798	2.12576	down		lincRNA:chr13:65341237-65342006 reverse strand	AGGATTCCAAGTTCCAACTAAAGAGTCAACTCCTTCCAGGAAGACTCAAGAAAAATCCGA
A_52_P192059	-1.08681	2.12404	down	Nup210l	Mus musculus nucleoporin 210-like (Nup210l), mRNA [NM_029937]	AGTGTCTGGCTATAAGCACTCAATGCTCACGACAGGCCTAACTGTCTACCTAGTAAGAAT
A_55_P2080372	1.08624	2.1232	up	Gm10674	Mus musculus activated spleen cDNA, RIKEN full-length enriched library, clone:F830228N06 product:hypothetical protein, full insert sequence. [AK157637]	GGGGTTGGTTGTGGTTTTGCTTTTGGTTGTTTGATTGATTGATTTCATTTACATAGATAG
A_30_P01030447	1.08488	2.1212	up		lincRNA:chr11:79551346-79551596 reverse strand	ATGATTTCGTAGTTTTGCAAGACTGAGTCAAGACATCATTCACAGCTTCCCGTCCATCTT
A_51_P106591	-1.08391	2.11977	down	Celf3	Mus musculus CUGBP, Elav-like family member 3 (Celf3), mRNA [NM_172434]	GGGTGGGGAGGGTAAAGGATAAGAAGGGGGAATCAATTTCTGACAGTTCTCTACTCTTAA
A_30_P01023585	1.08322	2.11876	up		lincRNA:chr2:116796887-116797441 forward strand	GCTCCTCTGACTTTTTCTTTTCTATTCTTATTGTTTGGGTTTTTTGGTGGCAGCAAATGC
A_55_P1957768	-1.08314	2.11864	down			AAGAAGAAAAGAAGAAAACACTCTGCCAGATGGCAGGGTCAAAGTGAAATCGAATCTTGA
A_30_P01028614	1.0817	2.11653	up		lincRNA:chr6:51794614-51795280 reverse strand	TAGCCTGGCAGTTGGGGGCTGTCATGGTTGTTGATTGAGTGTTTGTTTTTAGGTTTTGCT
A_30_P01019906	-1.08079	2.11519	down		lincRNA:chr6:129151512-129208737 forward strand	AAGTCTCATCCAACCGCATCGCTAATAACTAAAACGAAACACAAAACAAGTAAGGAGGGC
A_30_P01032443	1.08024	2.11439	up		lincRNA:chr5:121759042-121789992 forward strand	TGTGCACTGACCTGGCAGAAGAGATCAGCGCTAACTTTGAGGCCTTGCCATTCGCCATGG
A_55_P2138956	1.08021	2.11434	up	Tpk1	thiamine pyrophosphokinase [Source:MGI Symbol;Acc:MGI:1352500] [ENSMUST00000150599]	CAAGAAGTGCTTGCTGAGAGGAGACTGATAGAGCCTCTTGGTATCCAGTCTTCACTGTGA
A_55_P2267240	-1.07954	2.11337	down	4930471G03Rik	AGENCOURT_10518739 NIH_MGC_169 Mus musculus cDNA clone IMAGE:6706548 5', mRNA sequence [BU938417]	TAGTCGAGAAGGGGGGAATAGATTGAACGCAACAAACAAAGACTAAGAGAAAGAGAGACC
A_51_P271153	1.07948	2.11328	up	Olfr166	Mus musculus olfactory receptor 166 (Olfr166), mRNA [NM_147068]	AAACAGGCCTGCTACTTTTGATGCTCATCATCTTTGTCTTCTCTCTGGCTTTGTGTGGCA
A_51_P101545	1.07771	2.11069	up	Hgfac	Mus musculus hepatocyte growth factor activator (Hgfac), mRNA [NM_019447]	GGGACTCAGGTGGGCCCTTGGTCTGTGAGAAGAATGGTGTGGCTTACCTGTATGGCATCA
A_52_P23661	1.07708	2.10976	up	Cldn19	Mus musculus claudin 19 (Cldn19), transcript variant 1, mRNA [NM_001038590]	TTGACTGCTGTCTCCTGGTATGCTACCCTGGTAACACAGGAATTCTTCAACCCCAGCACT
A_30_P01018769	-1.07693	2.10954	down		lincRNA:chr13:108577843-108679708 reverse strand	TTGATCACAGTGCACCACACAGAAGTCTTGCCAACTGCACAGAAGCTAGCAGATGAAATT
A_55_P2127809	-1.0755	2.10745	down	Olfr1006	Mus musculus olfactory receptor 1006 (Olfr1006), mRNA [NM_146570]	AACAAAGATGTCAAAGATGCCTTCAGAAAAGCAACACAGACAATACGACCACACACATGA
A_30_P01024224	1.07545	2.10738	up		lincRNA:chr13:112337405-112356455 forward strand	TTTTTCTTTCGTGTGTCCCCCATTGTATTTAGAGTTGTTTGAATGCCAGCATTACTGGGC
A_55_P2070786	1.07414	2.10547	up		RT14_MOUSE (Q9CR88) Mitochondrial 28S ribosomal protein S14 (S14mt) (MRP-S14), partial (79%) [TC1673037]	TTCAGGTGTGATCCGTCATGTGAAAGCTGCGAGAATGACTCCGGGTTATAAGGAGCCGAG
A_30_P01032322	1.07378	2.10494	up		lincRNA:chr9:41368823-41369514 forward strand	GTTATGAAATGAGCTGCAGAGTTTGAGAAGCCCTTTCCTTATGTACTGAGAAGGTTTCCA
A_30_P01025219	1.07266	2.10331	up		lincRNA:chr13:34186976-34210579 reverse strand	TTGTTCTTACCGGCAGTACATTTCCCTCTGCACTGTTATAGTGAATCTGTGCTGCCTTCT
A_30_P01032523	1.07234	2.10284	up		lincRNA:chrX:47893703-47996700 forward strand	CACAAATTCAAGCAGGCAAGGGTTTTATAAAGTGGTTGTCTTCAGTTCTCCCATTTTCTA
A_30_P01025672	1.07162	2.10179	up		lincRNA:chr8:71938275-72113375 forward strand	TCTCCAGAGTGTGGGTGGGCTATTTCAGAGGTCTCTTTCTTAATCTTCTGTCTGGACCAC
A_55_P1962011	1.07074	2.10051	up	Clec1b	Mus musculus C-type lectin domain family 1, member b (Clec1b), transcript variant 1, mRNA [NM_019985]	GGATGTCAGATAAGTGCTTGATCATGCAATAAAAGATCTGGACAAAAGAACTCCGCATTC
A_30_P01033180	-1.07065	2.10038	down		lincRNA:chr14:79724027-79729152 forward strand	AAGAGCAAAGACAAAAACTAACTCAACCTGCCGCACAGACACACATGCTCGTTCTTTTTT
A_30_P01032763	-1.0693	2.09841	down		lincRNA:chr2:33500594-33501874 forward strand	AAGACTAACTCACAGAATCGGACACAGATTCACAAAAGCCAGGGAGTTCATTGGTCTCCA
A_55_P2108948	1.06925	2.09834	up	Gjc3	Mus musculus gap junction protein, gamma 3 (Gjc3), mRNA [NM_080450]	TTGATGTGATGTATGTGCCTGCTCTTATTGTAGCTTGCATTACAGTGTTTGGTTGATGTC
A_52_P633300	-1.06749	2.09578	down	Morc1	Mus musculus microrchidia 1 (Morc1), mRNA [NM_010816]	AACGAAAAGCTAAAAACGTGTTTCAACCAGATCCAGAATATCTACATGGCTCAGTATGAG
A_51_P475728	1.06715	2.09529	up	Zfp689	Mus musculus zinc finger protein 689 (Zfp689), mRNA [NM_175163]	TGTGATTCACCTCAGCCTTCTGAGTAATTGGTAGTCTGGGCTCTGGTCAACTGTTCTTTT
A_55_P2102833	1.06699	2.09505	up		predicted gene 13201 [Source:MGI Symbol;Acc:MGI:3649941] [ENSMUST00000177629]	ACAGTCAGTCTCAGGCCTCAACCTCTTTCTCCTGTAGTACTGCCCACTGGCTGCTGGACT
A_30_P01020104	1.06621	2.09393	up		lincRNA:chr3:30059174-30060808 reverse strand	AATATGTAAAGTAAGTCAGCCAAATTACGATAGCAAGAGTGGGAGAGAAGTTTCAAAGCC
A_52_P72587	1.06534	2.09266	up	Prkcq	Mus musculus protein kinase C, theta (Prkcq), mRNA [NM_008859]	CATTTACTTGAAAGATGGTTCCCGATGCTGTGAAAGATTCGAAATGCAGTTCTGCTCTTG
A_30_P01019508	-1.06512	2.09234	down		lincRNA:chr12:25852471-25852681 forward strand	GGGGGGGGAGGGTACAGTGAGAGTCAGGATGAGAAACATGAGGCACCTAACCAGAGGCAG
A_55_P2135541	1.06477	2.09184	up	Cnpy4	canopy 4 homolog (zebrafish) [Source:MGI Symbol;Acc:MGI:1913705] [ENSMUST00000130126]	TTCTCTTCCAGTCATTCTGACTCCAGTGTATGTTCATGTGCCTTGGGTCAATGAGCAGAA
A_30_P01024012	-1.06301	2.08928	down		lincRNA:chr14:77042348-77042645 reverse strand	AGAAAGATGAAAAATAGAGGGTGTGGGGGAAGGTGTATTACATTTCCTCTGCTCTTTGGG
A_55_P2014174	-1.06293	2.08918	down	9130004C02Rik	Mus musculus 10 days neonate medulla oblongata cDNA, RIKEN full-length enriched library, clone:B830024C08 product:septin 7, full insert sequence. [AK046843]	GAATGTGGGAGCTGTAAGGCCGATATTTTAACATACTAATACTGACTTTTAAAGCCAAAA
A_55_P1953107	1.06261	2.08871	up	Adamts20	Mus musculus a disintegrin-like and metallopeptidase (reprolysin type) with thrombospondin type 1 motif, 20 (Adamts20), transcript variant 1, mRNA [NM_177431]	ATCTTCTTTTTTCCCAGACACTATCTGGAAAGGCAGTTCCATTTGCTACAGCTGGGGACT
A_30_P01026623	1.06119	2.08665	up		lincRNA:chr9:40268246-40268441 reverse strand	TAGATGTGGTGGCTGGTCAGCTGTGGTTTCTTTAGACTGTATTTAGCAAGAGCTGACTTC
A_55_P2382345	-1.0604	2.0855	down	4933435E02Rik	Mus musculus adult male testis cDNA, RIKEN full-length enriched library, clone:4930405J08 product:unclassifiable, full insert sequence. [AK029588]	GGAGAAAGGCTGAAAAATAAACATCACGCTCTGGCTTTAAATCTGATGTGTTTCATATTT
A_55_P2121563	-1.05988	2.08476	down	Ankfy1	Mus musculus ankyrin repeat and FYVE domain containing 1 (Ankfy1), mRNA [NM_009671]	AAGTTTGACCTGAACAAGCCTGTGCGGGTTTGCAACATTTGCTTTGATGTACTGACTCTG
A_30_P01021110	1.05963	2.08439	up		lincRNA:chr2:32950586-32984936 reverse strand	GCATGTTCTTAGTTCTAATACTTCTGCCTCCTGTATTTCTGTGTGATCAGCTTATCTGTT
A_52_P622850	1.05955	2.08428	up	Hes5	Mus musculus hairy and enhancer of split 5 (Drosophila) (Hes5), mRNA [NM_010419]	ACGATGATCCTTAAAGGATTCCTTTGTATGGGTGGGTGCATGTGGGCACGATTTTGTACT
A_52_P150547	-1.05893	2.08338	down	Cd8a	Mus musculus CD8 antigen, alpha chain (Cd8a), transcript variant 2, mRNA [NM_009857]	TCTCACCCTGAACAAGTTCAGCAAGGAAAACGAAGGCTACTATTTCTGCTCAGTCATCAG
A_30_P01022843	1.05725	2.08096	up		lincRNA:chr1:94077196-94077860 forward strand	TCTTCTAGACCTGGGCCAAGCGCCTATAATTGGCGTTCACGAATGTGGATGGGCGTGAAA
A_30_P01030157	1.05717	2.08084	up		lincRNA:chr17:74595885-74597555 reverse strand	TGAGTCTTCTTAATTCGATGCAGTGTCAGCAGCTGGATTTCTTACTGAATGTTTACACAG
A_52_P470466	-1.05663	2.08007	down	D3Bwg0562e	Mus musculus DNA segment, Chr 3, Brigham & Women's Genetics 0562 expressed (D3Bwg0562e), mRNA [NM_177664]	TACAGATCAAAGCTATCGTGTGAGTATATTGTGCTAACATCATAGAAATAAAGATTAGAT
A_55_P2127288	1.05587	2.07897	up	Spsb1	splA/ryanodine receptor domain and SOCS box containing 1 [Source:MGI Symbol;Acc:MGI:1921896] [ENSMUST00000105684]	TGTTTTTCTTTCCACCCATTAGGCAATACAGAGTGCTTCACGACCTTTGGAGATCGCCTA
A_55_P2131939	-1.05566	2.07866	down			TTATTTAAGGAGCTAAACCTAAACTCAGGTACCCAAGAGTTAACGCAGATACCCCGCACG
A_55_P2165120	1.05563	2.07863	up	Cblb	Mus musculus Casitas B-lineage lymphoma b (Cblb), mRNA [NM_001033238]	GCTTCTCTTGTTAGTTTAAGTTCTGTGACCTTTAGGTTCCCGAACTCTCCCTCTCATCCA
A_55_P2235136	-1.0555	2.07843	down	Dpy19l2	Mus musculus dpy-19-like 2 (C. elegans) (Dpy19l2), mRNA [NM_001166207]	AAGTAATTATTAGAATTCAACAAAAATGGTACGAGCTATGTTAACCAATAAAGTGTTCCT
A_30_P01026110	1.05465	2.07722	up		lincRNA:chr4:53312709-53355184 forward strand	CGTGGCCTTCCACGATCTCTGCCTCATCTTATTTGGCACACTCTCTACCTGCTTCAGGAA
A_66_P112684	1.05394	2.07619	up	Lsamp	Mus musculus 15 days embryo head cDNA, RIKEN full-length enriched library, clone:D930023J12 product:unclassifiable, full insert sequence. [AK086355]	TGTTTATTGGGTGGATATTTTTTCCCTGAATACTAGCTCTGTGAAGGAAAGTAAAAAAGC
A_51_P192964	-1.05393	2.07618	down	Clec12b	Mus musculus C-type lectin domain family 12, member B (Clec12b), transcript variant 1, mRNA [NM_001204223]	GGATTAATCTGACTCTTCCAGATCTATCCAGAAGTAAAGACCTATTGCAAACCCATGCAA
A_55_P2049913	1.05253	2.07416	up			TGTAAGAAGTTTCTTCAACGTGCAAATTGCCTGGTCTGTGGCTGTCAGTACAGCAGTAGA
A_30_P01026327	1.0524	2.07398	up		lincRNA:chr2:119412770-119435110 reverse strand	TCTTAACAGTTTAGTATGTCGCTTCTATGGAGCCTTTCAAGCCGCTACAACAGGACTTGG
A_51_P153693	-1.05235	2.07391	down	Utp14b	Mus musculus UTP14, U3 small nucleolar ribonucleoprotein, homolog B (yeast) (Utp14b), transcript variant 2, mRNA [NM_001001981]	ATTGGCTCAAAAACAAACAAACAAACAAGCCCAAAAAGATTCTAGGAAGAGTTTATAGGC
A_52_P538145	1.05224	2.07375	up	Cdc14a	Mus musculus CDC14 cell division cycle 14A (Cdc14a), transcript variant 2, mRNA [NM_001173553]	TCCAGTGAGGGAAGTATTACAAAAATTATTTCTACCCTGGATGATATGTCTATTGGTGCA
A_30_P01030614	1.0517	2.07297	up		lincRNA:chr2:174428737-174439062 forward strand	ACAGTATCCTTTCCAGCGGGACACTAGAGCCTGGACCCTGTCCAAGGGGGCTTTGGAAAA
A_55_P1994473	-1.05169	2.07296	down			CAAATACACAGGAGAACTCATACCGGAGAGAAGCCATATAAATGTAGTCAATGTAGTAAA
A_30_P01020699	1.05161	2.07284	up		lincRNA:chr6:133054025-133069850 reverse strand	CCGTATTAGGTTATGCGTTTACCTGTGTATTAGGACTATTTATATTGCAAGTGACAAATC
A_55_P2035858	1.05052	2.07127	up		predicted gene 2822 [Source:MGI Symbol;Acc:MGI:3780992] [ENSMUST00000164299]	GCTGTTCATTCATGAATTCACAGCAAGACCTACACACGATGGAGCCTGTCAATCAATATT
A_55_P2116536	1.05021	2.07083	up	Kcnf1	Mus musculus potassium voltage-gated channel, subfamily F, member 1 (Kcnf1), mRNA [NM_201531]	TTCATTCCCCTGCTGACAGAGGAGAAGCATCATAGGACCCGCCTACAGAGTTGCAAGTGA
A_51_P209836	-1.05018	2.07079	down	Ccdc79	Mus musculus coiled-coil domain containing 79 (Ccdc79), mRNA [NM_180958]	AAGAAAACTCCTCAACAGCCGAAATTTTAGCAAGTTTTTGCACTCATGTGCATACCAGTG
A_55_P2065919	1.05005	2.0706	up		MACRO domain containing 2 [Source:MGI Symbol;Acc:MGI:1920149] [ENSMUST00000110064]	CTTCGAACTATATTTGTTAGAGCAGAGTGCAAATAAACTTCTTTGAGAGGATAATGTGGA
A_30_P01023783	1.04917	2.06933	up		lincRNA:chr13:28952570-28953234 reverse strand	AAACTACATAGATTTTTCAGGTTTTTCTGGACTCATGGAAATGTTGCCACAAAATTTTTT
A_30_P01033185	-1.04906	2.06918	down		lincRNA:chr4:88604248-88645948 reverse strand	GCGATGGAGGGAAATGCCAAAAGTAGACCAGCAACCCAGAAAAAGAAGACATAATCACAT
A_30_P01018465	-1.0481	2.0678	down		lincRNA:chr19:33049479-33054553 reverse strand	TGCCATTCCACAAAGAACCACCAGCCAACCTTGGCTGAAGAAGGACAACCGTGTACATTG
A_30_P01032424	1.04711	2.06639	up		lincRNA:chr3:27837825-27880925 reverse strand	AGGTATTGCTTCCATCAGATTAGCCAGTGGGTGTACCTCCTGAGTATTACAAGTGCACAT
A_52_P347691	-1.04685	2.06602	down	Cyp4a29-ps	Mus musculus cytochrome P450, family 4, subfamily a, polypeptide 29, pseudogene (Cyp4a29-ps), mRNA [NM_001100183]	TGAGGAAGGCTCAGCTACAGGACAACAAATCAATGGAGAAGCTCAGAGGAAAGAGATGTT
A_51_P479808	-1.04596	2.06474	down	Mapk6	Mus musculus mitogen-activated protein kinase 6 (Mapk6), transcript variant 2, mRNA [NM_027418]	TGGTGTGGAGGGAGAGCGAGGTTAACCATTACTACGAGCCCAAGCTTATTATAGATCTTT
A_30_P01026399	1.04546	2.06403	up		lincRNA:chr17:33368400-33393525 forward strand	AGTTTCTCTGGAGCTGTGGGTAGTTCACATCCATACTTTCTTCCTCTGTCTTCCCTAAAA
A_55_P2092204	-1.0451	2.06351	down	Lgals12	Mus musculus lectin, galactose binding, soluble 12 (Lgals12), mRNA [NM_019516]	TCAAGGGAGAAACTGACCTGGCATCACTTTGTCAGGCCGAGCTCACATCTCAAAGGGCGC
A_30_P01022844	-1.04501	2.06338	down		lincRNA:chr1:52507374-52514124 forward strand	TAAATGGAGCAGTCAAAAGAACAGTCTTAGAAATTATGACCAAAGAATCAGGCACTGCCA
A_55_P2013873	-1.0449	2.06322	down	Gm3718	PREDICTED: Mus musculus predicted gene 3718 (Gm3718), misc_RNA [XR_168476]	ATGAGTTCCAGAACAACCCGGCTACATGAGGAAATCCTATCTTGGAAATAAATAAATAAG
A_30_P01021986	-1.04487	2.06319	down		lincRNA:chr5:77188626-77219161 forward strand	TTAAAGGCTTGACAAATTCAGAGCCAGGCCACAAGAACGAGGAAGAGAATCTCAGCTTCA
A_55_P2165889	-1.04398	2.06191	down	Akap17b	Mus musculus A kinase (PRKA) anchor protein 17B (Akap17b), mRNA [NM_001081956]	ATTAAAGATCCTGAGAGTAAGTCGCAAAAGACAGGCAAGATCAATTATGCCAAAGAATTT
A_30_P01029709	1.04381	2.06167	up		lincRNA:chr4:11102287-11118421 reverse strand	TGAATGCTCTTTGAGACTCCTGAGATTTGTACTTGGCTCTTTGTGGCCTTATCCTGAGTC
A_30_P01024711	1.04338	2.06106	up		lincRNA:chr13:58481189-58488048 reverse strand	CTACAATAATTTAATATGAAATAGAGGTAGTCCTTGATGTATGGACGGTTGCCAACTGTG
A_30_P01025880	-1.04322	2.06083	down		lincRNA:chr1:58443698-58449898 forward strand	CATGTTTGACTAAGGAAGGCCAACTGAAGTAGTCTACTATAACACAAAACACTGACTCCA
A_30_P01020060	-1.04175	2.05872	down		lincRNA:chr3:36280098-36347798 reverse strand	GGAGGGGAGGGTCCCCTGGTGGGAGGAGGGGAGGTGAAGAGAAGAGATTTATTTCCTCAC
A_55_P2403686	-1.04126	2.05803	down	1700039O17Rik	AV209124 RIKEN full-length enriched, adult male testis Mus musculus cDNA clone 1700112O11 3'. [AV209124]	CCATTCAGAACGTTGTTAAAACGACGCCCAGTAAATTTTAATAGAACTCATAATAGGGGA
A_30_P01023575	1.03941	2.05539	up		lincRNA:chr17:6306310-6311805 forward strand	TTTGGTGAGTTGGCTCAAAGTCTGTTCTAGGACATTAGTGGTCCACTGGTTGACTTTGCT
A_30_P01031542	1.03824	2.05371	up		lincRNA:chr7:99879368-99889978 forward strand	TTAGCGTTAGTCGAGAAAGACTGCTCACTTGCAGTCCCTTTTCAATGTCGTTTACGTTCG
A_30_P01021799	-1.03816	2.0536	down		lincRNA:chr11:79531631-79531761 forward strand	AAAGGGGTCTTGGGGTCCTAACTTAGATATGAGGGGTGGGAGTGGAGCAGGGGGTCAGCT
A_30_P01026625	-1.03811	2.05354	down		lincRNA:chr19:23068397-23190256 reverse strand	GGGGTGGGGTGGGGTTGTTCTTTCTTCTTAATTCTAAAGACTTTTGAGTCGTGCTCTACT
A_30_P01024079	-1.03759	2.0528	down		lincRNA:chr5:92556322-92558910 forward strand	TATACTTTCATGGAATCTTGGCAGCAGCCAATGAGAACTTCAAAGGCTTGGCCTAGCTGT
A_55_P2069719	1.03721	2.05226	up			ACCAGTGGTCTCTCTGGTGAAGAAGCCGTTCATCTTTTTGTTTTCCCTTTGGCTTTCTGA
A_30_P01022472	1.03681	2.05169	up		lincRNA:chr19:53517903-53540753 reverse strand	TCTGAACATCATTGTCACTGATCCCTGTTGATCCCTGTAGCCTTTTATGTCAGCTCTTCC
A_55_P2167530	1.0355	2.04982	up	Scube3	signal peptide, CUB domain, EGF-like 3 [Source:MGI Symbol;Acc:MGI:3045253] [ENSMUST00000043503]	GTGGTACACAGAGTATTTTGCACTTGGGGAAAAATATGTATCTGAAAACTTGTAAAAAGG
A_30_P01021225	1.03549	2.04981	up		lincRNA:chr9:43738583-43757007 reverse strand	CTCCTTGCTTTGTGCTGTTTAAGGATCTAGGGGACCCTGCATGGAAGTTCCTCCTCTTGT
A_30_P01032639	-1.03467	2.04865	down		lincRNA:chr2:28151215-28151611 forward strand	AGGTAGGCTTAATAGAGTCTGAGATGGGGTATAGGGGGTACTAGTGTACTCAGAACCTCT
A_30_P01026036	1.03442	2.04829	up		lincRNA:chr17:15226181-15250333 forward strand	TTGGTCTGAGCGCACCTGTATTCCAGCCTGTCCTGAGTATATCTCTCAGCCCACGCTCTG
A_30_P01017727	1.0341	2.04784	up		lincRNA:chr12:4579206-4583562 reverse strand	CACTAAGCTGCCCTAAGATGACTGGTGACTCTTGAGTGTCCAGTTTGTTTATCAACCTCT
A_30_P01025267	1.034	2.04769	up		lincRNA:chr7:91558475-91733625 reverse strand	CTGGTGGTTATGTGAGAGTCAGTAAGGCGAAGGTGAGCCTTCTCCATCTCTGAGTGGTTA
A_55_P1999274	-1.03282	2.04602	down			CAAAACGAAGCCTGGACATTTAATTTGGAAAAAGGTCCCTTCGACGTCTCTGAGCAGACA
A_55_P1969610	-1.0323	2.04529	down	Nhs	Mus musculus Nance-Horan syndrome (human) (Nhs), mRNA [NM_001081052]	ATGATGAGTGGACAAGTGGCCAATTATCTACCACACACCAACTATTTATAGGACACACAC
A_55_P1973183	1.03024	2.04236	up	Gm2238	Mus musculus 13 days embryo heart cDNA, RIKEN full-length enriched library, clone:D330003A20 product:unclassifiable, full insert sequence. [AK052169]	GTATCCTCAGCACCTACCAGAGTGCTTAACCGCCTTGTAAAGTTTAATAAATATTTCTGG
A_66_P137374	1.03017	2.04227	up		Mus musculus 3 days neonate thymus cDNA, RIKEN full-length enriched library, clone:A630088K24 product:unclassifiable, full insert sequence. [AK042398]	GAATCTCTGTTACTAAGCACTATTCACTCAAAGTTGCCTCAGAATAAACTTTCTTTTGGT
A_51_P427917	1.02976	2.04169	up	Il31ra	Mus musculus interleukin 31 receptor A (Il31ra), mRNA [NM_139299]	GGTAAGTGTGCTACCCATCTCACTCACCCCAAGTTTATTACGCATTGACTGCTGCTAAAT
A_52_P116184	-1.02919	2.04088	down	Gm2795	Mus musculus adult male corpora quadrigemina cDNA, RIKEN full-length enriched library, clone:B230307H16 product:unclassifiable, full insert sequence. [AK045720]	AGAGCTGGGTACTAAGTCTTTCAGGTTTCTGTTTTAATAGCAATTTCATAGCGGCAATGA
A_55_P1968698	1.02884	2.04039	up	Rere	Mus musculus arginine glutamic acid dipeptide (RE) repeats (Rere), mRNA [NM_001085492]	ATCTGCAACCATTTCCTTCTCCAGATGGTGATACTGTGACTCAGCATGAGGAACTTGTCT
A_55_P2170350	1.02851	2.03992	up	Klra22	Mus musculus killer cell lectin-like receptor subfamily A, member 22 (Klra22), mRNA [NM_053152]	CTTAGACTGGAGTGCAAAGAGAGAGACAATCCTGAAGATTTTTGGAATGTTTTCTGAAAC
A_66_P127412	-1.02794	2.03912	down		Mus musculus strain C57BL/6 clone 83 immunoglobulin heavy chain mRNA, partial cds. [JX120281]	ATAAACTACGCACCATCCATAAAGGATCGATTCACTATCTTCAGAGACAATGACAAGAGC
A_30_P01025241	-1.02515	2.03517	down		lincRNA:chr13:41337973-41379821 reverse strand	GCAAATCCCCAATGAAAATAAGTAAAGCACTGTGGCGAACATGGGGGTGTTGAGATTGTA
A_52_P616580	1.02509	2.03508	up	Lgr6	Mus musculus leucine-rich repeat-containing G protein-coupled receptor 6 (Lgr6), mRNA [NM_001033409]	TGGAGAAGAGCTCCTGCGACTCCACCCAAGCGCTGGTGGCTTTCTCAGATGTGGATCTTA
A_30_P01031457	-1.02479	2.03466	down		lincRNA:chr15:77575125-77585575 forward strand	ATATAGAACATGAGATGGAAGAGGAAGATAAGCAGAGAGGTGGTCTTGTCCATCATCCCC
A_51_P127738	1.02465	2.03447	up	Scn2a1	Mus musculus sodium channel, voltage-gated, type II, alpha 1 (Scn2a1), mRNA [NM_001099298]	ACACACGGAAAGGGTATACTTCTCATTTCAGGATGTTTTTAGATTTTTTGAGGTGCTTAA
A_30_P01022275	-1.0246	2.0344	down		lincRNA:chr15:5969454-5994540 reverse strand	GAATGAGTTGGGAGAGAAAATGAAGCAAATACAGTACTCGTCCATGAAATCTTCAAAAAT
A_55_P2131300	-1.02427	2.03394	down	Catsperb	Mus musculus catsper channel auxiliary subunit beta (Catsperb), mRNA [NM_173023]	TTAACACTTACATGGCATGGGTGTTTTGGGGGGAGATTGTTTTCCAAAATATAAAGTGAT
A_55_P1992874	1.02415	2.03376	up	Tas2r135	Mus musculus taste receptor, type 2, member 135 (Tas2r135), mRNA [NM_199159]	ATTGTTATACTCTTCAGCAACCCTGTTTTGAGAGTGGTGATAAAGAGGGGCTGCTGCTGA
A_30_P01030960	1.02366	2.03307	up		lincRNA:chr19:54011403-54018978 forward strand	TGGACTGTGTGTGTGCACATCCTCCGTAAGTATACTTACAGGTGCATCCCTTTCCAGACC
A_55_P2317480	1.02311	2.03229	up	E130104P22Rik	Mus musculus 0 day neonate eyeball cDNA, RIKEN full-length enriched library, clone:E130104P22 product:unclassifiable, full insert sequence. [AK053520]	TCTCTGTAATAGCTCCTTTTGTCTTTCTGTCCTTTACCATCAGTCAGTGATAATGATAAA
A_52_P143129	-1.02015	2.02812	down	Eno4	Mus musculus enolase 4 (Eno4), mRNA [NM_178689]	TTTATCAAGTTGGGGGGTCTTTCTCGGGGTGAACGGATGACCAAATACAACCGCCTTCTT
A_30_P01026943	1.01999	2.02791	up		lincRNA:chr17:45524689-45525320 reverse strand	ACCTATAATCTTTAAGAAGTGTTCTGGGGCCCTTTATTTCTTCAAGACCTTTTTCTTGTT
A_51_P325198	1.01953	2.02725	up	3110009E18Rik	Mus musculus RIKEN cDNA 3110009E18 gene (3110009E18Rik), transcript variant 2, mRNA [NM_001172074]	CACCCCTAACGCAGTCTTGTGTTCCATCAGTGCTTTATAAAGGCGGAGACAATGTGATAT
A_30_P01030232	1.01933	2.02698	up		lincRNA:chr2:31714946-31716972 forward strand	ACTTCCCTCCAAGCCAATGGGCAAAGCAGCAGGATCCTCAAGAGACCCAGCTGTGTCTCT
A_30_P01032717	1.0176	2.02454	up		lincRNA:chr13:83867711-83878140 forward strand	TGTCACTTCTATAGAATGGGATTTCCCCCTTCTTCCTCTTTAACCAGCGTTGGAAACTGC
A_55_P2166389	-1.01748	2.02438	down			TGCCTGGCCCATAAGAGCTTAACAGAAGTTAAGGATGTAAAAGTCTGGTGCAAGAGGGTT
A_30_P01021449	1.01592	2.02219	up		lincRNA:chr15:74507625-74519200 forward strand	TTGATACCACCATGCCCATTCTCCTCTCACAGACCCTTATAGACAACATCACCATTGTGG
A_55_P2147280	1.01546	2.02154	up	Myh1	Mus musculus myosin, heavy polypeptide 1, skeletal muscle, adult (Myh1), mRNA [NM_030679]	GATGAGCAAAATGTGAAGATCTTTGTCACTCTGTTTTGTACTCATAACTTTGGGAGATAA
A_55_P2139703	1.01544	2.02151	up	Krtap5-4	Mus musculus keratin associated protein 5-4 (Krtap5-4), mRNA [NM_015809]	GTTCACCTCCTTTGTGGTAGGTTTCCTTTACTGTTTCCTCCTCTTTGTAAGTCTAATCTG
A_30_P01018872	1.01527	2.02129	up		lincRNA:chr1:107866276-107887102 reverse strand	ATGGAACATCTGAATTTGGTGTACCCGTAGTCACTTGCAAATCTTAGCTTCTCTGCTCCC
A_55_P1984830	1.01527	2.02129	up	Fgl1	Mus musculus fibrinogen-like protein 1 (Fgl1), mRNA [NM_145594]	GCCAAGTGATTTTATTCCAAATATTATTTAGTTGCCCTCATTGGGATCTCCTTTCTGTAA
A_30_P01031659	-1.01505	2.02097	down		lincRNA:chr14:65785477-65815777 forward strand	CCACGAGGAAACAAAGCTTTAAACTTCAGTGAGAAAGTAAGACTCAAAATCAAAATCTAG
A_66_P106808	1.01496	2.02085	up	Scn3a	Mus musculus sodium channel, voltage-gated, type III, alpha (Scn3a), mRNA [NM_018732]	TCCACTTTCTGGATGGTGTTAGCTTACAAGTGTTTTAGTCTGTTATGTTTGTATCTGAGC
A_30_P01031823	-1.01322	2.01841	down		lincRNA:chr17:21177225-21187525 reverse strand	CGAGGAGGTGGGAGGGGCAAATCCACTGGAATACCATCAAACTCACTGGTGTAGTGGACT
A_55_P1980631	-1.01175	2.01635	down	Aurkb	Mus musculus aurora kinase B (Aurkb), mRNA [NM_011496]	TTCAGAAAAATTATGAAGAACAACATTTTATAATAAAGTCTTAAATGTTTCATGTTTTTG
A_52_P1042732	1.01001	2.01392	up	Akap5	Mus musculus A kinase (PRKA) anchor protein 5 (Akap5), mRNA [NM_001101471]	CCATAAGAGTACCACTTTGTATCCTCATTGAAATTAGTACTACTGTGACTCAAAAGCTGA
A_55_P2122856	-1.00996	2.01386	down	Pcbp3	poly(rC) binding protein 3 [Source:MGI Symbol;Acc:MGI:1890470] [ENSMUST00000105411]	TGGACCTTGTGTGCAACAATTCTGTCTGGCCTAGGAAGATGCATCATCTGGTACAATAGT
A_55_P2150781	1.00901	2.01253	up	Mul1	mitochondrial ubiquitin ligase activator of NFKB 1 [Source:MGI Symbol;Acc:MGI:1915600] [ENSMUST00000105815]	AACTACCCACCTTTGGTGCGTGTCCTCTGGCTTCTACACCAGTGAAGTAGTGGTATAGAA
A_55_P2024773	-1.00874	2.01216	down	Rbl1	Mus musculus retinoblastoma-like 1 (p107) (Rbl1), transcript variant 2, mRNA [NM_001139516]	CCGAGAGGAATTGGAGGAGGGGAAAACTTGATCAGAATATATTGTATGGAAAAATTTTTT
A_51_P225493	1.00682	2.00948	up	1700016C15Rik	Mus musculus RIKEN cDNA 1700016C15 gene (1700016C15Rik), mRNA [NM_027077]	ATTAGGCACGATTTCATTGCATCCTAGACCAGTTAATTCAGTACCAGAAGTCTACTGCTG
A_55_P2084965	-1.00616	2.00856	down	Klk13	Mus musculus kallikrein related-peptidase 13 (Klk13), mRNA [NM_001039042]	AAACACTCCAGAGCAGAGATGGACAAAGGGCACACAATAAAATTGTGTTCATTTGCCCGC
A_30_P01027643	1.0059	2.0082	up		lincRNA:chr14:79725080-79725434 reverse strand	CATGGGCTGGTTTCACTGTGACATTTTTGTACGTACGTATTTTTATTTTGTGTTGTTCTT
A_55_P2121956	1.00416	2.00578	up	Gck	Mus musculus glucokinase (Gck), mRNA [NM_010292]	ACATCAGTGATCCGGGAAGAGAAGCAAGCCACCCACAGCATCTCTCCAGGAAACCACCCA
A_55_P2002050	-1.00355	2.00493	down	Scgb2b24	Mus musculus secretoglobin, family 2B, member 24 (Scgb2b24), mRNA [NM_177446]	CAGAATGCCTGCAGTACTATTCCGAAGAAACCTTTACGAAAATTAAGGATGCATTAAAAA
A_55_P2130497	-1.00212	2.00294	down		Mus musculus isolate M14H immunoglobulin heavy chain variable region mRNA, partial cds. [GQ856057]	AATGACTGTAGACAAATCCTCCAGCACAGCCTATATGGAACTTGCCAGACTGACATCTGA
A_55_P2348293	-1.00178	2.00246	down	1700003I16Rik	Mus musculus adult male testis cDNA, RIKEN full-length enriched library, clone:1700003I16 product:unclassifiable, full insert sequence. [AK005642]	AAACACAAGGACAGATGAAATACAAGTCACCCTATACAAACCAACCAGTGTCTAAAAAGG
A_51_P500970	-1.00165	2.00229	down	Vmn2r37	Mus musculus vomeronasal 2, receptor 37 (Vmn2r37), mRNA [NM_009489]	TGATATCAGCAAGTATCATATCTACTGAACTTCCCTACAGTGTCCATAAAATCTTGTACT
A_30_P01019152	1.00134	2.00186	up		lincRNA:chr3:145313275-145315057 forward strand	TAGCCTGCGTTTTTAACATTTTTCTCCCTCTGTTATCCAACCACAAGGCATTCTTGACAG
A_30_P01018046	1.00131	2.00182	up		lincRNA:chr3:131153358-131154061 forward strand	AATGACTCTGAAAGAGTGACTCTCCACTTAAATGAACCTGTGCGTTTCTGTTGCCTTGGG
A_51_P259983	-1.00084	2.00116	down		RIKEN cDNA 4930425F17 gene [Source:MGI Symbol;Acc:MGI:1925357] [ENSMUST00000077150]	CTAGAGCATCCCACAATGCTGCTGGATGTACCCGCTATGTAAATATTAGACTGACTAACT
A_55_P2274134	1.00005	2.00007	up	9030625N01Rik	Mus musculus 16 days neonate cerebellum cDNA, RIKEN full-length enriched library, clone:9630020A13 product:Ras and a-factor-converting enzyme 1 homolog (S. cerevisiae), full insert sequence. [AK035942]	GCCTCGATTTTGAACTTCTGGCCTCCAGCGCTATGACAGAATAAATGATGTTTTTAAGTC
A_30_P01023355	-0.999781	1.9997	down		lincRNA:chr11:120079199-120130099 forward strand	AGATCCTGGGCGAATTTGATTGGGGGGCGGGGTGATTGTTCCAGCCTCACCGGGAAGCTC
A_55_P2050483	-0.999431	1.99921	down	Abcc12	Mus musculus ATP-binding cassette, sub-family C (CFTR/MRP), member 12 (Abcc12), mRNA [NM_172912]	TAAAAGCAAATGAGATGGGAAAATGCCCAAGGCTGGAGATGACAGCGTTCCTGGATTTTG
A_30_P01026230	-0.998978	1.99858	down		lincRNA:chr2:31714946-31716972 forward strand	TGCCACTTGCACTATCTCTACCGCCCTCCCGCCCCTCTCCACAAAACCTCCGTGCCCTGA
A_30_P01018381	0.997878	1.99706	up		lincRNA:chr1:33893475-33903900 reverse strand	ATTTTCTTCATAAGAAGAAAGCGGTGACATCTAGATGGCCCTGTAGGGAAAGAGGTGGAG
A_51_P420400	0.997383	1.99637	up	Lef1	Mus musculus lymphoid enhancer binding factor 1 (Lef1), transcript variant 1, mRNA [NM_010703]	GTACAGGTCCCAGAATGACAGCTGCCTACATCTGAAACATGGTGGTAAGAGAAGCTCCTT
A_51_P277756	0.997303	1.99626	up	Tas1r2	Mus musculus taste receptor, type 1, member 2 (Tas1r2), mRNA [NM_031873]	CTGTTAATCTGTGTTTCATTCCGGTTCCTGGGGAGCACAGACTGGGACTCCTGTGTTCTA
A_55_P2111530	-0.997116	1.99601	down	E230008N13Rik	RIKEN cDNA E230008N13 gene [Source:MGI Symbol;Acc:MGI:2685871] [ENSMUST00000127261]	AGCCTTCTTTTAGACAGGGATGGCGGGGGTCGGGGGAAGCCAACTGAACAAAAGCACCAT
A_55_P2096189	0.996862	1.99566	up	Rfx8	Mus musculus regulatory factor X 8 (Rfx8), mRNA [NM_001145660]	GGAACCCTAAAGTTTTTGTATTGATCTCGGAGACTTTAATGTATATAATAGATGAGGCGT
A_30_P01026488	0.996511	1.99517	up		lincRNA:chr14:73729977-73751877 reverse strand	ATCCAAGACAAGCACCGGTCATCTGGATCTTGCAGATGGCGCATGCGTGGCACTCCAAGT
A_55_P2011106	-0.996156	1.99468	down	Junb	Mus musculus Jun-B oncogene (Junb), mRNA [NM_008416]	AGGGCTTTGCGGACGGTTTTGTCAAAGCCCTGGACGACCTGCACAAGATGAACCACGTGA
A_55_P2020716	-0.995463	1.99372	down		Q3S875_9ACTO (Q3S875) Hydroxybutyryl CoA reductase, partial (5%) [TC1641645]	CACAGCTCTGGTTGAGAAAATCATAAAATCAGCAGGTCTATGAATTAGAGATATTTGGAA
A_30_P01023124	0.99489	1.99293	up		lincRNA:chr13:70745633-70776516 reverse strand	AAACGTTTACATGCTATTTGTTCCCCTGAGGAGACTTGGCCTGCACTTCTATTCCAGACA
A_30_P01027792	0.992348	1.98942	up		lincRNA:chr8:108153471-108159672 forward strand	TTACCCTTATAATCAATGGGGCCTTCCTTTCCAAGGCCATTTCTCCTGGTTCTCATACAT
A_30_P01029942	-0.992232	1.98926	down		lincRNA:chr13:54399275-54445825 reverse strand	AGAAATGAAGGGTGGCTGGGGGTAGGGGTGAGGGTTGGGCTGTTGCACATGGAGTCTTCC
A_30_P01029255	-0.991424	1.98815	down		lincRNA:chr17:87492112-87506638 reverse strand	CAGCCATGTTAAGTCAGAGCGTCTTCACAAGAACAGACCCCACAAATAACTGCCAGAAAA
A_66_P120018	-0.991168	1.98779	down			GTACGAGAAGGCCATTGCTGCCTGCAAAGCAAAAGGAAAAGCCGATATAGCAAAAAGGGG
A_55_P2024145	0.991073	1.98766	up	Vmn1r62	Mus musculus vomeronasal 1 receptor 62 (Vmn1r62), mRNA [NM_030741]	AACCTCACTCCATGTGTTGTATAGGCAATGCCACCCCCAATAAAGATATCTGCTTCACTG
A_30_P01027560	0.99091	1.98744	up		lincRNA:chr3:100363012-100369462 reverse strand	CTGGGGTTCAGTCTTCATTGTTTGAAGCATTTCTTTTGGCTTTGTCTGTTTTCACATTTC
A_55_P1993473	0.988233	1.98375	up	Gm1993	Mus musculus predicted gene 1993 (Gm1993), mRNA [NM_001102677]	CTTTCCCATCTTCAGACTAATGAAGCATACATATTTCTCCCTTGCTGGTACATTGTAACC
A_55_P1992218	-0.988142	1.98363	down			GTGGGAGAAAAACAAGAAGATGGGCGGTACACTACTGACTGTGAGTATGTAATCAATTAA
A_55_P2090652	-0.98791	1.98331	down			CCAATTTAGGGAGAACCTGACTCAAAATAAAAAGCAAGATTTAAATAAAAGGTACTGGCC
A_30_P01029122	0.987873	1.98326	up		lincRNA:chr6:30983012-31009987 reverse strand	ATGGGTTGCCTTGTATTTATAAGGAAGTTTTTGTGTCTCTGATCTGACCTTGTTCTGTCC
A_55_P2415417	0.987842	1.98322	up	Olfr29-ps1	Mus musculus olfactory receptor 29, pseudogene 1 (Olfr29-ps1), non-coding RNA [NR_033638]	TTATTTCTTTCTCCTATGTCTTCATCCTTGTGACAATCCTGAGGATCCCCTCTGCTGAGG
A_52_P1044964	0.986336	1.98115	up	Grin2b	Mus musculus glutamate receptor, ionotropic, NMDA2B (epsilon 2) (Grin2b), mRNA [NM_008171]	AAGGTGTTTATCTAAGGAAGGCCATTGAACCTCCTGCTCCTAAGAGAGAAGAGGCTTTCT
A_30_P01029435	-0.985737	1.98033	down		lincRNA:chr6:99472981-99484210 forward strand	CTTTGCCCTCAGCACACCTGGGCATCCTGACACAGAAAAGAAAGGGATGCAAAAATAATT
A_51_P358256	-0.98397	1.9779	down	Nr1i3	Mus musculus nuclear receptor subfamily 1, group I, member 3 (Nr1i3), transcript variant 1, mRNA [NM_009803]	AAGAGAAGAGATAGATCAGCTACAAGAGGAGATGGCGCTGATTCTGAACAACCACATTAT
A_55_P2423228	0.982456	1.97583	up	AI464196	Mus musculus RCB-0545 OHTA cDNA, RIKEN full-length enriched library, clone:G430028I15 product:unclassifiable, full insert sequence. [AK089957]	GGGCAAACTAGACCAGACAGTTCATGGACATGTTTATATGTCCATTTCCAAGATTAAACA
A_55_P1998854	-0.982171	1.97544	down			TACAGGTACTAGTGTCTGTGTGAACCTTGAAACCACCTCTACTGAATTCCTGTCAGAAGC
A_52_P574274	-0.980263	1.97282	down	Spatc1	Mus musculus spermatogenesis and centriole associated 1 (Spatc1), mRNA [NM_028852]	AGCTAGACCGAAGAATCCTGTCCAGCATCTTCCCAGAGCGCGTACGTCTCTACGGCTTCA
A_30_P01021713	-0.979791	1.97218	down		lincRNA:chr4:15233302-15233632 reverse strand	AACAATAAATAGTCCACTGTCAGTCACTAAGACCTTGAGCCTCACAACCTCAGTGACAGC
A_55_P2408588	0.979491	1.97177	up	Arntl	Mus musculus aryl hydrocarbon receptor nuclear translocator-like (Arntl), transcript variant 1, mRNA [NM_007489]	GAGCCATTGATACAAGTCAATCTACCATGTGTAACTTCAGACAAAGTGGAACTAAACCTG
A_55_P1985638	-0.979366	1.9716	down	Shisa7	Mus musculus shisa homolog 7 (Xenopus laevis) (Shisa7), mRNA [NM_172737]	GGCACTTGGCTGGGGGTGGGGTGTTGGTTTTTGTTTTGGAATAAACAGCTGTTTTCCTGA
A_66_P101707	0.979276	1.97148	up	Adam4	Mus musculus a disintegrin and metallopeptidase domain 4 (Adam4), mRNA [NM_009620]	TGCAGTTTTCAAAGCAATATTTGTTTCAGAAACTACAGAAGAGGAGCAACATTCTGCTGT
A_30_P01024601	-0.978628	1.97059	down		lincRNA:chr19:21655691-21665116 reverse strand	TTGATTTTAGGGGATGGAGCTTAAGAACATCAAAAGCTGGGGCTAGATGTCTGAGGCAGA
A_55_P1953723	0.978346	1.9702	up	Rab13	Mus musculus adult male corpora quadrigemina cDNA, RIKEN full-length enriched library, clone:B230212B15 product:GTP-binding protein rab13 (fragment) homolog [Rattus norvegicus], full insert sequence. [AK080805]	GCTGCTTTTGTTAGAGTATTCTCAGTGTTGCACAAAGAAATACATGAACAAGGTGAGAGT
A_30_P01033221	0.978165	1.96996	up		lincRNA:chr3:95443575-95462543 forward strand	CTTAGCTTGGACTTACTTTACCTCTAAATTCGCTACATTTCTGTGCCTGCTTTTCTCCTG
A_55_P2006158	0.978002	1.96974	up			GGACCCTTGTCTCCTTGTATACCTGTCTTAGATATTCTCAGTCCTACAGATCTGTGAATT
A_52_P120803	0.977495	1.96904	up	Ankrd1	Mus musculus ankyrin repeat domain 1 (cardiac muscle) (Ankrd1), mRNA [NM_013468]	CCCCTTTGTGTTCTCACTTGCATAAAGCTATTCAAGGTACTTTTTAAAAGGCAAGGGTTG
A_55_P1969910	-0.977459	1.969	down		Mus musculus 12 days embryo spinal ganglion cDNA, RIKEN full-length enriched library, clone:D130011M08 product:unclassifiable, full insert sequence. [AK083799]	GAAATGGGAATAAAAGAAAGAGAGTCGGAGGACCAAGTAGATTGAACCTATCAAGGTCTC
A_66_P138053	0.977438	1.96897	up	Gm9917	PREDICTED: Mus musculus predicted gene 9917 (Gm9917), misc_RNA [XR_168462]	TGTTTTCACAACTGTGTCTTTGCAGTTGTCACATTTGCCTGTAAAGAAACTACGGATCTT
A_30_P01025296	0.976492	1.96768	up		lincRNA:chr18:36470130-36489110 reverse strand	TTAAACTGCTGGGGATGTCACTGCGTTGTCCTTCCTTTCTTCTGTGAGGAAGAAAGATGT
A_52_P490071	0.974891	1.96549	up	Olfr810	Mus musculus olfactory receptor 810 (Olfr810), mRNA [NM_146550]	TATCCTACATTTACATTGCTATAACAATTCTAAAAATCCCTTCAGCCAGCCAGAGGAAGA
A_30_P01032620	-0.974769	1.96533	down		lincRNA:chr3:95460633-95461443 reverse strand	AAACGGGCTCCTAACCACTGTTCCTGACATCCACATATGCATTAAATCTATACATTTTTG
A_30_P01020836	0.974179	1.96452	up		lincRNA:chr15:102926581-102932542 reverse strand	TTGATGGACACGAGCAACTGTCGGCACAATCTATTTAAGAGTATTCTGAGCCCTCAGAGA
A_30_P01021464	0.971971	1.96152	up		lincRNA:chr6:133054025-133069850 reverse strand	TATGTAAGTGTATACGGGCATAGAGTCTGCATTTGTAACACACCATAACTGAAAACGTCA
A_30_P01027638	0.971456	1.96082	up		lincRNA:chr13:24611851-24612400 reverse strand	AACCTTGCGGCCAGTTCAAGTGCGAGCATTTGAGATGCTCCGTCGCTTTCTCCGCTGGTA
A_30_P01028463	-0.971119	1.96036	down		lincRNA:chr10:66349796-66378261 forward strand	AGTCAACCGCCAAGGTCTCCAGCAGACTGCGGACTCCCAGTAATTGACACAGTGAAGCCA
A_51_P326685	-0.970593	1.95965	down	Lrtm1	Mus musculus leucine-rich repeats and transmembrane domains 1 (Lrtm1), mRNA [NM_176920]	TGAGAAGATGGGAAGTAAGGAACTTATGGACAGTTCATCAGCCTGAGAGCCTTCATTTCC
A_51_P464394	0.970341	1.9593	up	Klb	Mus musculus klotho beta (Klb), mRNA [NM_031180]	TTTTCAGCTAAACTGCCATTTCTGTCATAGTTTCAAGATTCACTCCGGCTCCATGTACTG
A_52_P144794	-0.970307	1.95926	down	Tceanc2	Mus musculus transcription elongation factor A (SII) N-terminal and central domain containing 2 (Tceanc2), mRNA [NM_025617]	AAGCCTTGGAATTGAAGATGGATCACCTACTGGTTGAAAATATTGAGCGGGAAACGTTTC
A_55_P2018111	-0.970303	1.95925	down	Pabpc4l	Mus musculus poly(A) binding protein, cytoplasmic 4-like (Pabpc4l), mRNA [NM_001101479]	TGTGCTTGAGTGACTGCCTGCATGTGAAAACTATAGCAATTAAAAACATAAAATTCATCC
A_55_P2199463	-0.969021	1.95751	down	Tfap2a	Mus musculus transcription factor AP-2, alpha (Tfap2a), transcript variant 1, mRNA [NM_011547]	ACGCCGATCCATGAAAATGCTTTGGAAACTGACGGATAATATCAAGTACGAAGACTGCGA
A_30_P01032100	0.968728	1.95711	up		lincRNA:chr8:67542714-67561694 forward strand	TTCCGGTGATTGGGTATCTTTGCTTTCACCCTTCTTCTGGTAGAGCCAAGGAAATTAGAG
A_30_P01026051	0.968154	1.95634	up		lincRNA:chr4:12050675-12066450 reverse strand	TTAGAGCCGTTCTCATCACAGACCACCTTACAGGACAAGATGTTTCCAAAGGCAGAGAAA
A_55_P2000783	-0.967399	1.95531	down	Axin2	Mus musculus axin2 (Axin2), mRNA [NM_015732]	CTTGGTACAATAATTATTGTAATTAAGAGATGTAGCCTTTATTAAAATTTTATATTTTTC
A_66_P102232	0.967209	1.95506	up	Hmga1	Mus musculus high mobility group AT-hook 1 (Hmga1), transcript variant 6, mRNA [NM_001166537]	GGCGGCGGTGGCGGCAGAGCCAGGCCGGTGCCCTGAGCCCAGCCACGCCGCACCCGGCAG
A_30_P01031187	0.967117	1.95493	up		lincRNA:chr2:165802256-165805186 reverse strand	GGCACTGCCTCTTCCAGTTTGACAGCAAGTGTCTTTTACCTTCTCAGCCACCTGAGAACC
A_55_P1981391	0.966931	1.95468	up			CCTTTCAACATTCTCTTCTGCTGGAGTCAGCACGGAGGTCAGGGTCTCCACAGTTCCTGA
A_30_P01021422	-0.966606	1.95424	down		lincRNA:chr5:53931541-53945241 reverse strand	TACCCAAGAAAAAGGGGGTGGGAGTTGGGGGTTTGCCAAATCAGGAAATGTGAATTAACA
A_30_P01024169	-0.966305	1.95383	down		lincRNA:chr8:119732348-119749198 reverse strand	AAAGCAACCTAACGCTAACATGATGAGCATTATGAGGTGTGTGCATGGGGCTTCAACTGT
A_55_P2007165	-0.966212	1.9537	down	Dnajc21	DnaJ (Hsp40) homolog, subfamily C, member 21 [Source:MGI Symbol;Acc:MGI:1925371] [ENSMUST00000147224]	CAACCTAGACAGATTAAGTAAATACTTAGTGGTTAAAACGAACCTGGCAAAGACTTAAAG
A_55_P2397614	-0.965856	1.95322	down		UI-M-AN1-afb-g-12-0-UI.s1 NIH_BMAP_MBG_N Mus musculus cDNA clone UI-M-AN1-afb-g-12-0-UI 3'. [AI842900]	GTATAGGAAGATGTATGTTCATATACCCAAAGACAATGTAGAATACATAACATTGGGCTC
A_51_P307168	0.965271	1.95243	up	Ddah1	Mus musculus dimethylarginine dimethylaminohydrolase 1 (Ddah1), mRNA [NM_026993]	GATGAGCTAGAAGGATTGCATAGTTAGCACTATGTCTTTAACTGGTGGGTTGCTGTACCA
A_55_P2077988	0.964749	1.95172	up			TTGGGAGTTTTGTTAACTGTGAGCTAGCACAGCCTCTGGAAGATTGTGCTGTAAGGTTGT
A_55_P1972143	0.962914	1.94924	up			ATGCCCGAGCAGTGTCTCTTCTACCTGTTTAGTGCTCATGGGGCAGGCTTTCAAAAGAAT
A_55_P2008634	0.96281	1.9491	up	Pcdhb10	Mus musculus protocadherin beta 10 (Pcdhb10), mRNA [NM_053135]	GTATGCATGTCCTCCATTACCAAAGTGTTTACTTAGTTCACAATATCCACTGTACTTAAT
A_30_P01021350	-0.962301	1.94842	down		lincRNA:chr13:65338067-65365992 forward strand	AGCACGAGGCCGGAGGAGGACGACGACGACAACAGGACCTAGAGAGGTGAGTGACAATGT
A_55_P2284948	-0.961419	1.94722	down	1700094J05Rik	BY707136 RIKEN full-length enriched, adult male testis Mus musculus cDNA clone 1700094J05 5'. [BY707136]	TATTCTCTATCAACGAAGCATAGGTACGCGCGTGATATGAATTTAGACCAGGGACATCGC
A_30_P01023069	0.960444	1.94591	up		lincRNA:chr13:113205145-113207570 forward strand	GAAAACTTGAGAAGCTGTGCTGACTGTGCAGTGAATTGAAGAGGCTTCCTCTTCAAAGCT
A_52_P100252	0.96033	1.94575	up	Fasn	Mus musculus fatty acid synthase (Fasn), mRNA [NM_007988]	ATTGGTAGGGTACAAAGGTGTTCAGAGGATCCCAGTCTGAGTGATTAGCCTAAGACTGAA
A_55_P2009001	0.959103	1.9441	up	Gprc5d	Mus musculus G protein-coupled receptor, family C, group 5, member D (Gprc5d), transcript variant 1, mRNA [NM_001205396]	TCCACTCTTCTGGACCCAGCCTCTGAAGACTGTCATGTCCTGCACAATTAAAATCTTGTT
A_51_P163354	0.958233	1.94293	up	Ogdhl	Mus musculus oxoglutarate dehydrogenase-like (Ogdhl), mRNA [NM_001081130]	TCGGATGCCTACCCAGTGTTCACTGAGGACTTTGAGGTGAGCCAGCTCTACGACTGCAAC
A_55_P2080378	-0.95757	1.94204	down	Ttc30a2	Mus musculus tetratricopeptide repeat domain 30A2 (Ttc30a2), mRNA [NM_001081228]	CCTGCTGTCATAGAACAGCCCTTGGAGGAAGAAAGAATGCACATTGGAAAAAATACAGTC
A_55_P2107489	-0.957028	1.94131	down			TACAAGGCCCAACCTCTAGTCAAAGAGCTAGAGACAATCCAGGCCTGTTGAGAGACAGTC
A_30_P01026050	0.954827	1.93835	up		lincRNA:chr2:32960372-32986870 reverse strand	CTGTGGGAGTCAGCTGGCACAAACCCTCCTCTGGAAAGCGAAGTCATCTCTCTCTTTCGG
A_30_P01019875	-0.954125	1.9374	down		lincRNA:chr5:110182844-110228345 reverse strand	GGCACATCTTTCTCAGTGGGAAGGATGAAAAACAAAAACCTGTGCACACACACAGCTATT
A_55_P2173039	-0.953978	1.93721	down		predicted gene 6802 [Source:MGI Symbol;Acc:MGI:3646076] [ENSMUST00000167843]	TTTAGAGCTTTATTATAGAAAGGCAGGAAGAAAGAGAGAAGGTAGAAGAGAGAGGCCCCC
A_30_P01027163	-0.953915	1.93712	down		lincRNA:chr2:22782700-22801900 forward strand	TGGACAGTTGAAACAGAAAAGAAGACTGAGATGAGGAAATTATTCAGCTGGGATGGTTGC
A_30_P01021077	-0.952482	1.9352	down		lincRNA:chr15:83266264-83294664 forward strand	AATTTACACACTGCAAACGTGGAAAGCAAACCAGGACAAACCCTGTCAGCTACTGTGGTT
A_55_P2082786	0.951546	1.93394	up	Trib2	Mus musculus tribbles homolog 2 (Drosophila) (Trib2), mRNA [NM_144551]	TGAGCCGGTAGACCCGAGCTTATTTCCTTTTTCTTTTTGTTTGGTTTCTAACGCGTGGAG
A_52_P612209	0.950952	1.93315	up	Wtap	Mus musculus Wilms' tumour 1-associating protein (Wtap), transcript variant 2, mRNA [NM_175394]	TTCTGGCTAGAAAATCTGTTGTATATGATTCCAAGAAACAGGTAGCCATAACTTTAATCC
A_30_P01030415	-0.949289	1.93092	down		lincRNA:chr15:74320784-74321384 forward strand	TACACAAACAGAACCATTGGGTATCTCAGGCTCCTCGAGTATGATAGGAAGAAGGTAACC
A_30_P01019552	0.949199	1.9308	up		lincRNA:chr15:36300306-36310544 reverse strand	AATCAAGCCAAGTATTTGTTGCTATTCAAGCTATACGGTCCCCAGATTGTCTTCCAGCAG
A_30_P01032868	0.948733	1.93018	up		lincRNA:chr2:77146893-77155643 forward strand	CCGAGGCTTTCTATAGTAACATTTTCATCCCCCGGATCTCTGCTCTTGACATTTACGTCT
A_30_P01025958	0.948645	1.93006	up		lincRNA:chr5:22801058-22939737 reverse strand	GACTTCTCCCTGCAGTACTTGGACAGCTACTCCCTGACTGAATGTGATGGCTACTTCCAG
A_30_P01024767	0.948549	1.92993	up		lincRNA:chr19:14916280-14916548 forward strand	GTCCTGTGGCCTTAATTCTTCATGGACACACTCTCGTTCATCCTCTCTTGTCCAGAAAAC
A_55_P2054723	-0.948219	1.92949	down	Ctdspl2	Mus musculus CTD (carboxy-terminal domain, RNA polymerase II, polypeptide A) small phosphatase like 2 (Ctdspl2), mRNA [NM_212450]	AGAATGCAGGACCCTTTTGGACTAAGACAAAAACATTGCCATTACTGTTGAAATTTTGCA
A_30_P01030092	0.947838	1.92898	up		lincRNA:chr4:114631940-114632618 reverse strand	GGTGTATAGGATTATTTAGTAAATAATCCCAATAAACGCTATGCTGATGCCTTTGCTGTC
A_55_P2035129	-0.947061	1.92794	down	Btnl5-ps	Mus musculus butyrophilin-like 5, pseudogene (Btnl5-ps), non-coding RNA [NR_004051]	ATATATTTAAAAGATTATCAGCTCCATGGCATGTGCGTCTGAGGGGAGGGAGGGAGAAGA
A_66_P106611	0.946661	1.92741	up	Gna14	Mus musculus guanine nucleotide binding protein, alpha 14 (Gna14), mRNA [NM_008137]	TGCCTTTCTGGATACTAAGAATACACTGTTCTACCCTGAACACCAACGATGATGTGCTTC
A_30_P01023584	-0.946315	1.92694	down		lincRNA:chr6:37732925-37784092 reverse strand	CCATAACCACTGGGATGATGGACTTCATGATCAGCTCTGGCCTCATGACTGACATGGCTG
A_55_P2050360	0.945837	1.92631	up			TGAAAAACAAGATGGAAGCAGATTGCCTCCCTTTAAAATGGTCGCTATGGGAACCCCAAA
A_55_P1987884	-0.945328	1.92563	down	Skint4	Mus musculus selection and upkeep of intraepithelial T cells 4 (Skint4), mRNA [NM_178786]	CATCCTGAAAGAGGTAACCCAATCATAAAAAACAAACAAACACAGCAAAAAACCAAACCA
A_30_P01024497	-0.944937	1.9251	down		lincRNA:chr12:70602812-70603402 forward strand	AGATGTAGAGGAAATGAAGACGTTAGAGCCAGAAGCCAGTTTCTGCCAACAGGAACAAAG
A_55_P2095103	0.943999	1.92385	up	Gucy1a2	Mus musculus guanylate cyclase 1, soluble, alpha 2 (Gucy1a2), mRNA [NM_001033322]	CTGTTTCAAATGACCATCATAGTTACATTCTTTTTTGCTTTATGTGCTTGTAAGGCACTC
A_30_P01024799	0.943802	1.92359	up		lincRNA:chr13:112717680-112733330 forward strand	CTCACTATATTTTCCCAGTAACGGATTGAACTTGCAAAGTGTTGTCCTGTGTCCTACTGC
A_30_P01029264	0.943516	1.92321	up		lincRNA:chr13:94193230-94193710 forward strand	GCAGCTAGATAGATATGGTCCCCAGTGCTGTTAATAATAACAGTGCAAATTATTTTTGAA
A_55_P2098591	-0.942947	1.92245	down	2610318N02Rik	Mus musculus RIKEN cDNA 2610318N02 gene (2610318N02Rik), mRNA [NM_183287]	AGAAGAGGAGGAGGAGGCCAAAACCAAAGAAACCAGATCCTATCTTTCGAGATCAGTCAA
A_30_P01033566	-0.942263	1.92154	down		lincRNA:chr3:126989696-127112471 forward strand	AAGAAAAACCTGCCTTGCAATTACAAAAGAAAAAGGAAAAACCCCCGAAACTGCACATCA
A_55_P2091294	-0.942064	1.92128	down	Hps5	Mus musculus Hermansky-Pudlak syndrome 5 homolog (human) (Hps5), transcript variant 1, mRNA [NM_001005247]	TTTCTCAGAAGATGAAAGGCTTAAAGAATTTGCCTCACACCAGGAAGAGGAGCAGCCAGA
A_55_P1978666	0.940639	1.91938	up	Sybu	Mus musculus syntabulin (syntaxin-interacting) (Sybu), transcript variant a, mRNA [NM_176998]	GCTCCAAAGTCTTATAAGACTCATTTGCTCTTAAACCTGTCAGTTAGTGATACTATGTAA
A_51_P373393	0.940399	1.91906	up	Lce3c	Mus musculus late cornified envelope 3C (Lce3c), mRNA [NM_033175]	TCAAGAAAAGCCCAGCTAGTCTTGTTTTATCTGATCCTGGAGAGTCTTCTCTGCCTGTCT
A_30_P01032758	-0.939816	1.91828	down		lincRNA:chr8:49915104-49915704 reverse strand	TATAAACTATGGAAGAAGATGGGGGTGGCAAGGACAGATACGGGATTTCAGTGAATGAGA
A_30_P01030788	-0.93962	1.91802	down		lincRNA:chr12:33808493-33829143 forward strand	TTCACCAGAAGAACCGTATCTAAATGTGAAATAAAACCTGCCAAGCATAAAGAGAAACGG
A_30_P01017928	-0.939503	1.91787	down		lincRNA:chr10:81165750-81236400 forward strand	GCAACTAAAAGCAACAAAGAGTAATCTCACTCCTAGCTCCTACATTTCAGAGCATGAAAA
A_55_P2189893	-0.939315	1.91762	down	A630073K07Rik	Mus musculus 3 days neonate thymus cDNA, RIKEN full-length enriched library, clone:A630073K07 product:unclassifiable, full insert sequence. [AK042233]	AAATATAATCCACTCAATCAGCAAGAGGCAGAATGAGGGTTTGAACTGGGAGGCCTGGTT
A_30_P01018573	0.939109	1.91734	up		lincRNA:chr3:127170996-127201096 reverse strand	TAAATTTGCCAGGAAGCTGCACCACAACTATGGCTTTTAAAGATACTGGGAAGACGCCAG
A_51_P514913	-0.938896	1.91706	down	Rsad1	Mus musculus radical S-adenosyl methionine domain containing 1 (Rsad1), mRNA [NM_001013381]	TCCCATCGCCTGATAATCATTTGACCAGTGACTTTAGCACCTACTAGTGATTCTTTCCCA
A_55_P2193064	-0.938279	1.91624	down	6720473M08Rik	Mus musculus 12 days embryo eyeball cDNA, RIKEN full-length enriched library, clone:D230040F06 product:hypothetical protein, full insert sequence. [AK142114]	CCAGAGGCAAAAAAGGAAATGAATAAAAAGTGCCAGATTTTCTTAAGCCTTAAAGTAGGT
A_52_P467861	0.938209	1.91615	up	Urad	Mus musculus ureidoimidazoline (2-oxo-4-hydroxy-4-carboxy-5) decarboxylase (Urad), mRNA [NM_001039678]	GGAAGACTTAGAAAATCACTTTTTTGCCTTTATTGATGCTCTCCCGAGATCAGGCCAGGA
A_30_P01032805	-0.937968	1.91583	down		lincRNA:chr8:35652473-35703370 reverse strand	TGTATTCCATTTGGTCTCTAAGCCCTTTCATAAGTACCTCTTTCCTACTTGGCGCTACCT
A_30_P01020291	-0.937902	1.91574	down		lincRNA:chr1:51753968-51803787 reverse strand	TTTTCTTGTCAATACACCTCAGTCAGGATTCTGAAGTGGGGGTTCTAGCACTCTGAACGT
A_55_P1997184	0.937444	1.91513	up			TTACATCCTTAGAGAGATCTTGGGACAGAGAAGCAGTGCAATCTCAGAAGAGAGGACATG
A_30_P01029411	-0.937324	1.91497	down		lincRNA:chr16:90008636-90015586 reverse strand	GGGCAGGGGACACTTCGTTGTTTTTATGAACTCAAAGTTAAAAATCTTAATGGGTTTTAA
A_55_P2009270	-0.937242	1.91486	down	1700123L14Rik	Mus musculus RIKEN cDNA 1700123L14 gene (1700123L14Rik), non-coding RNA [NR_003643]	TAAAAACAAGTAAGGATGCGGATGAACTGCACAAAATTTTACTGCAGAAAACGGATGCCT
A_55_P2077836	0.935864	1.91304	up		BC031479 Als2 protein {Mus musculus} (exp=-1; wgp=0; cg=0), partial (5%) [TC1769533]	TAGGATGAGAAGGGTCATCTGTGATCTAACATATGCTTGGGTGCCCGTATCCAAGTACTA
DCP_22_9	0.935783	1.91293	up		Unknown
A_55_P2320283	-0.935761	1.9129	down	Hmga2-ps1	Mus musculus high mobility group AT-hook 2, pseudogene 1 (Hmga2-ps1), non-coding RNA [NR_037996]	CTTCTGTTGGGTGGTGGGCTAAAAGAGGGTTAACTCATTTAAGAATTTGAAAAATTAAAG
A_66_P130840	-0.935687	1.9128	down	Gm5095	Mus musculus predicted gene 5095 (Gm5095), long non-coding RNA [NR_033454]	TAAAGGAAAAGTAGTAAAAATTAAAATGGAGAGAAACAGATAAATGTCCCAGGCCTGGGC
A_55_P2339650	-0.934533	1.91127	down	Hnrnpl	Mus musculus heterogeneous nuclear ribonucleoprotein L (Hnrnpl), mRNA [NM_177301]	TAGAAGATGGATCCTGCAGCTATAAAGACTTCAGCGAGTCAAGGAACAATCGGTTCTCCA
A_30_P01024096	-0.933479	1.90988	down		lincRNA:chrX:90997595-91009570 forward strand	AAGCCACCATTTGGTAGAGAAATAAAAACAGTAGCTCTCATCACTTCCACAAACGAGGTG
A_51_P110640	-0.932481	1.90856	down	Klk1b11	Mus musculus kallikrein 1-related peptidase b11 (Klk1b11), mRNA [NM_010640]	CCCAATACGCCGGGAGTCTACACAAAACTTATTAAGTTTACCAACTGGATAAAAGACACT
A_30_P01033443	-0.932407	1.90846	down		lincRNA:chr14:78924115-78938125 forward strand	TAAAAGAACTGCGAATATTAACTCCAGTATGCGCCAAGGCCATTAGCGATGTGTCTCAGC
A_55_P2185618	-0.932036	1.90797	down	Gpr61	Mus musculus G protein-coupled receptor 61 (Gpr61), mRNA [NM_175470]	TAGGGAAGAAAATAATCTACTAAATAAAACTGGGCAAACAGCTTTTTCCCTCTTTGGCTT
A_30_P01021207	0.93197	1.90788	up		lincRNA:chr15:96984422-97000322 forward strand	TCAGAACTTTGTAAAATCATTTCCTGGGTGTCGAATTCCTCCCCTGACTGCCATGAGGAT
A_55_P1984289	0.929898	1.90514	up	Cdan1	Mus musculus congenital dyserythropoietic anemia, type I (human) (Cdan1), mRNA [NM_026891]	ATTTGTTTACTGTTTTTCGAGACAGGTTTCTCCGTGTTGCCCTGGCTACCTAGGAACTCA
A_66_P139410	-0.929607	1.90476	down	Gm3279	Mus musculus predicted gene 3279 (Gm3279), long non-coding RNA [NR_046071]	AGCCCAGAAGGGCAGACTCTTCAAACCATTTTTTGAAATATATGGACACACACGTTTTGT
A_30_P01020849	-0.927423	1.90188	down		lincRNA:chr11:22510175-22522025 reverse strand	AGATAAACAAATTCACTGTGAACTGCCCAAGGAAGGATTGAGTACAAGAGGGGACAGACG
A_30_P01021908	0.927227	1.90162	up		lincRNA:chr4:59306575-59317850 reverse strand	CGTCTCTTATGTGGGCTGCCATTTTACTCCCTCGTTTCATTAAAAATAGCTTTTTTAAAA
A_51_P281089	-0.926326	1.90043	down	S100a6	Mus musculus S100 calcium binding protein A6 (calcyclin) (S100a6), mRNA [NM_011313]	TAACAAGGATCAGGAAGTAAACTTCCAGGAGTATGTCGCCTTCCTGGGGGCCTTGGCTTT
A_51_P218653	-0.926119	1.90016	down	Jph2	Mus musculus junctophilin 2 (Jph2), transcript variant 1, mRNA [NM_021566]	TCGGACCTAAAACCTTGCTCACATCCACTCCATGGACATTTAAGGAGGCCTCCAGAGAGC
A_55_P2391499	0.92545	1.89928	up	4933415J04Rik	Mus musculus adult male testis cDNA, RIKEN full-length enriched library, clone:4933415J04 product:unclassifiable, full insert sequence. [AK016822]	TGGCTCCTGGCTTTGAAAGAAATCCTTGATGGATGTCATAATAAAGAGGCTTGGTGGTGC
A_30_P01029322	-0.925337	1.89913	down		lincRNA:chr12:53669892-53710742 reverse strand	GTTTTGGAAGAGGTGTAAGGTGGTTAATGTGGAAACTTATAAATGCTAATTTTAATAACA
A_55_P1959849	-0.921928	1.89465	down	Gm2933	Mus musculus predicted gene 2933 (Gm2933), mRNA [NM_001145038]	CTTTCAGAAAGACAACAGGTTATAAAATCCTCACCTTTGAATATAAGGAGGAGCAAATTG
A_52_P674165	0.921894	1.8946	up	Rsbn1l	Mus musculus round spermatid basic protein 1-like (Rsbn1l), mRNA [NM_001080977]	CAGACCTTTACATCAAAACGTAGGTACATCAGTGGTATTTGATATATATACTTTTTCCCC
A_55_P2055055	-0.921661	1.89429	down	4930547M16Rik	Mus musculus mammary gland RCB-0527 Jyg-MC(B) cDNA, RIKEN full-length enriched library, clone:G930015F23 product:hypothetical protein, full insert sequence. [AK166420]	AACCTCCTGGTTGTGTTTAAAACAATAAAACCTTGATCATTGCTCATAAACCTGGACTCT
A_30_P01026714	-0.920275	1.89248	down		lincRNA:chr7:150399015-150482452 forward strand	TCCAAAATGAGGCCGACCACACCGGGCCTGACTGGACCAAAATGCACCATCATAGACCAC
A_55_P2061164	0.91957	1.89155	up			TCATCTTTGTGACATTACATACTTTCACAGCGCCTTGGGCTTATTTTCATTTCGACTGTG
A_30_P01025619	0.919487	1.89144	up		lincRNA:chr6:146493273-146493932 reverse strand	GGACTTAACTTCAGTGGTAGTTAAATATTTTAAGTGGTAATGTGTGTGTTGTGTGTACAC
A_52_P311031	-0.918795	1.89054	down	Gm9757	Mus musculus adult male testis cDNA, RIKEN full-length enriched library, clone:4933427C01 product:hypothetical Arginine-rich region containing protein, full insert sequence. [AK016943]	CTCCGCCCCCTCGCCCAACAGGAACTGGCCCCTCCGCCTGTCACAGAGCGACAGGTCCGT
A_55_P2072150	-0.918064	1.88958	down	Vpreb2	Mus musculus pre-B lymphocyte gene 2 (Vpreb2), mRNA [NM_016983]	AAGAAGAGAATGGAGAGAGAGTGGGAAGGAGAAAAGTCGTATACAGATTTGGGATCTTAG
A_55_P2158565	-0.916885	1.88803	down			GGATTACAGACATAGCCAAATCCAGGAACCGTACCATATACAACCACTCTAGCAAATGGC
A_30_P01025172	-0.91679	1.88791	down		lincRNA:chr12:73838608-73862621 forward strand	GGGTGGCTGGGGCGGGGGGAGGGGGGCCCAGGCAGGTGGGGCGGAAAGCGATGAGTCCTC
A_30_P01029065	-0.916607	1.88767	down		lincRNA:chr3:26975624-26988699 reverse strand	AACGAAAATTAAACAACAACAAAGCAGAGGGGAAAGCTAGGAATGTGGGCGGTGCTCTCA
A_30_P01027300	0.915108	1.88571	up		lincRNA:chr17:84355587-84356863 forward strand	AAATTACAGAGGTGGAGCCCTGAGGTGCCTCCAAGAGGCACAGGGTTGCCCACCTTTCAT
A_66_P135372	0.914486	1.8849	up	4933434I20Rik	RIKEN cDNA 4933434I20 gene [Source:MGI Symbol;Acc:MGI:1914805] [ENSMUST00000139692]	CTCATGTGGAATGCATGACCGACCCCTGGGCACACTTTTTCAATGGTTGAATTTGCTTGT
A_55_P2155197	-0.914043	1.88432	down	Tnfrsf22	Mus musculus tumor necrosis factor receptor superfamily, member 22 (Tnfrsf22), mRNA [NM_023680]	ACCGGAAATGCCAGTGCCGAACAGGTCTTTACTACTATGACCCAAAATTTCCAGAATCGT
A_55_P2170169	-0.913788	1.88399	down	Klk5	Mus musculus kallikrein related-peptidase 5 (Klk5), mRNA [NM_026806]	AGCCTTTTCTTCAGCCGTCACCCAGATTTAGACCTCAAATAAAAAACGGGAAGAACCGTG
A_30_P01033562	-0.913083	1.88307	down		lincRNA:chr3:93564825-93576725 reverse strand	TAGAAATACTCCCAAGCATCTGCTAAACACATGTAATTCCTCACAGGCAGAAACTCACAG
A_30_P01025237	-0.912097	1.88178	down		lincRNA:chrX:120134722-120138152 reverse strand	AGTAAAATGAGAGCCTGCCAACCTACCCAAAGGTTGGTAGGAACTTTGTTACCTAGACCA
A_55_P2112972	-0.911393	1.88086	down	Gm6288	PREDICTED: Mus musculus predicted gene 6288 (Gm6288), misc_RNA [XR_168432]	GTTTCCAATCAATCAGATTGGGCATTTTGGGTTGTCTTGACTTCATCTGTTATTTTAAAC
A_52_P60303	-0.910902	1.88022	down	Ccdc27	Mus musculus coiled-coil domain containing 27 (Ccdc27), mRNA [NM_001033455]	GACGACCTACAGACACGTAACGAGATCATCCAACAGACAGAGCAACAGACTCGTGTGGTC
A_30_P01022193	0.91073	1.88	up		lincRNA:chr13:73472571-73483846 forward strand	AGGCATCTTTCAAATGGTCTTGTATCTCCGTGTGGGTTGCCCATCCTCTGGACTAGAGAA
A_52_P675530	0.910219	1.87933	up	Fat4	Mus musculus FAT tumor suppressor homolog 4 (Drosophila) (Fat4), mRNA [NM_183221]	CCTATGCAGGCCCTAATTGGTTTTATTTTCTATCCATTCAACATTTACCCCAAGTACCCA
A_55_P2048483	0.910156	1.87925	up	D17Zt10e	Mus musculus D17Mia10e clone c7 mRNA, partial sequence. [U49252]	CTGGGTTGTATTCACAGCACTCATAGATAGCCTGGAGCATGAGCCCACCAGTCAGCCACA
A_55_P2045936	-0.909846	1.87884	down	Csmd2os	Mus musculus Csmd2 opposite strand transcript (Csmd2os), mRNA [NM_029137]	ATAAGCCAAAGATCCCAGGAACCTCCTGTGGGCAAATAAGAAGAACAGGGTAAAGTTGTG
A_55_P2270907	-0.909356	1.87821	down	Gm10441	Mus musculus mammary gland RCB-0526 Jyg-MC(A) cDNA, RIKEN full-length enriched library, clone:G830022E06 product:hypothetical protein, full insert sequence. [AK144996]	GTTTGTTACAAGGCACCAAAATCTCCAAAGCCGTGTTTTCTGTTTTGTGTTGTTTTGTTT
A_30_P01032071	-0.909143	1.87793	down		lincRNA:chr8:131168275-131182125 reverse strand	TAGACTTCAGCAACTCTCCAGCTGAGTGTTCTAATTATTTATATGGGGTTGGGGCAAGCA
A_30_P01021044	-0.907968	1.8764	down		lincRNA:chr5:91480533-91502237 reverse strand	GTCAATCCCATTCTTAGCAGCATTCTCCAAATAAGCTCAAACTCATGGATTTTCCAATGT
A_55_P1969058	0.905873	1.87368	up	Epha7	Mus musculus Eph receptor A7 (Epha7), transcript variant 2, mRNA [NM_001122889]	TGTCATCATAATTGCTGTAGTGGCTGTAGCAGGGACCATCATCTTGGTGTTCATGGTGTT
A_30_P01024773	0.905214	1.87282	up		lincRNA:chr17:25990279-25998670 forward strand	AAATGTCTGAATACATTGAGGAAAGGGTGCTGCCAGGCTGCAGAAGGGACGCCGCCTGAG
A_30_P01025914	-0.904932	1.87246	down		lincRNA:chr2:174088550-174109425 forward strand	ACAAAAAACCAAACAGCCCACCGTGTGACATGTGTTCCATGTAAAAAACAAATCAAAAAA
A_51_P470630	-0.904242	1.87156	down	2310014L17Rik	Mus musculus RIKEN cDNA 2310014L17 gene (2310014L17Rik), mRNA [NM_029809]	AAAGGAATATACTGGACCCATTTATCCAGACAATCAAAGACAATTACCCAACTCAAGATT
A_30_P01028663	-0.903294	1.87033	down		lincRNA:chr8:123571640-123607481 forward strand	TTAAGGAGATATTTGACCTCGGGTTTAATTGCAGGATGGAAGAAATGTCTGGGGCGCACA
A_30_P01025482	0.902407	1.86918	up		lincRNA:chr13:51248372-51259297 reverse strand	TAGAAGATCCTCCGTGCTGGTGGGCAGGAACTGTGATCTCACCTAATGAAGCATGCGGCC
A_55_P1981760	0.902023	1.86868	up	Vmn2r88	Mus musculus vomeronasal 2, receptor 88 (Vmn2r88), mRNA [NM_011686]	AGGTTACAATTTGTATAATGCTGTTTATGCTGTGGCCCACACCTACCATGAACATATTTT
A_51_P189051	0.901645	1.86819	up	Ppp1r27	Mus musculus protein phosphatase 1, regulatory subunit 27 (Ppp1r27), mRNA [NM_026814]	TGGTTAGGACTTGTGGGGAACGACCCTCTTGCCCCTATACCCATTTCTCTGGCCTGGCTT
A_51_P100537	-0.901307	1.86776	down	Prss58	Mus musculus protease, serine 58 (Prss58), mRNA [NM_175020]	GCCCTGGATTGAAGATACCATGAAAAATAACTGAGCTCCCACAACAGGAGGAATTCTGAA
A_55_P2004527	0.901303	1.86775	up	Klra8	Mus musculus killer cell lectin-like receptor, subfamily A, member 8 (Klra8), transcript variant 2, mRNA [NM_010650]	TTCTATCCTGTTGGAGAGAGGACAAATCTACTCAGGTGAATGGGCATGCTTTGCCCTAAA
A_55_P2048680	0.901209	1.86763	up		Q6TUF4_RAT (Q6TUF4) LRRGT00090, partial (19%) [TC1781628]	CATATATCCTGGTATCTGTAGGTAGCTACTTCTCACACCCTTCTTTATTTATTACACACT
A_55_P2147200	-0.89976	1.86576	down	Ttc37	Mus musculus tetratricopeptide repeat domain 37 (Ttc37), mRNA [NM_001081352]	GGCCAGCCATCTGGACACAATGAAATCCCATCTTGAAAAGAATAAAAAATAAAAACAAAG
A_55_P2002230	0.899546	1.86548	up		predicted gene 16503 [Source:MGI Symbol;Acc:MGI:3642127] [ENSMUST00000104964]	ATGAGGGAACACTCTTTTATTCAGTCCATGAGGATGGGAAGCATGTGAAAGGGAAGTGGT
A_30_P01019679	-0.899012	1.86479	down		lincRNA:chr6:37630192-37682692 reverse strand	AGGGATGGAAAAAGAAAAGGAAAAGCATTGTGAAGTCATTATTCCTCCTGTTGGGAATGT
A_30_P01020742	0.896777	1.8619	up		lincRNA:chr3:30059174-30060808 reverse strand	CAGTACCATTTGAAAATCCCCATAATGCTCGTATTTTATCTGGCATTAAGATATGAACTG
A_55_P1952304	0.896319	1.86131	up	Usp44	Mus musculus ubiquitin specific peptidase 44 (Usp44), transcript variant 1, mRNA [NM_001206851]	GTGCTTCATTGTTTTTATTCTGGAATTATGATCAGTGCCTGCTATGTTTAGACATTGTGT
A_55_P1964907	0.896007	1.86091	up			TATCAGTGTGCCAAGTGAGAGTGTGCTCACTCGGCTGTCTGTTTCTGTTACTGGGTGCCA
A_30_P01028457	-0.895792	1.86063	down		lincRNA:chr8:96983590-96994419 forward strand	ATAATGACAAGGTACACCCTGTATCCCAGCAGTGGTTGTTTAACACCATGAGCTTGGTGT
A_30_P01027904	-0.894895	1.85947	down		lincRNA:chr12:74135916-74142780 forward strand	CCTTGTATCGAGATTAAAGACATTTTAGAAAACATCACTTGATTTGGTGGGGGTTTTGTT
A_30_P01021451	-0.894749	1.85929	down		lincRNA:chr10:66559716-66647841 forward strand	AGGAAAACTGGATAAAAAAAGGGGAGAAGGTTATATGAAAATGGAAAGTATTGGTATAAG
A_30_P01031569	-0.893918	1.85822	down		lincRNA:chr2:35828611-35838083 forward strand	CAGTCTCCAACTTCATTAAACCACTTGTACCACACTTAGCACAAAGTTCAGAGCCTGAGC
A_30_P01024372	0.893027	1.85707	up		lincRNA:chr10:62347876-62374346 forward strand	AAGAGAATGTGACTGGGTCTGCTACTCCATTCCTAGTGTGTTTGTGTGGCATGCCTTAAA
A_30_P01028436	-0.892917	1.85693	down		lincRNA:chr15:5969454-5994540 reverse strand	ATAGAAATAGAAATATTAATGGATTATCCTCATAGGCCTGTGCATAGCCTGTTTGATGAA
A_30_P01023666	0.892705	1.85665	up		lincRNA:chr7:137669441-137675722 reverse strand	TAAGACTTTCCCTCCTATTTCAGGTACTCTTTCAGCACAAGGCTCTGGATTCAGGTTCCT
A_55_P2244677	0.892613	1.85654	up	6720422M22Rik	Mus musculus 12 days embryo male wolffian duct includes surrounding region cDNA, RIKEN full-length enriched library, clone:6720422M22 product:unclassifiable, full insert sequence. [AK032738]	AGCATGTTTTCCCACACAGAAAGCCTGGTAGTTGAGTTGTATATATTTAGTGTTAGGAGC
A_55_P1992617	0.892596	1.85651	up	Clec1b	Mus musculus C-type lectin domain family 1, member b (Clec1b), transcript variant 1, mRNA [NM_019985]	CATTCCGTTGGATTGGATTATCACGCCAGAACTCTAAGAAAGACTGGATGTGGGAGGATA
A_52_P78333	0.891701	1.85536	up	Lrrc29	Mus musculus leucine rich repeat containing 29 (Lrrc29), mRNA [NM_177449]	AGCCGTCAGACACTTTCAGGCACAGCTACCTCAGGTTACCTGCATCCAGTCTCGCTTCGT
A_51_P242687	0.891516	1.85512	up	Otog	Mus musculus otogelin (Otog), mRNA [NM_013624]	CTCCAAGCAGTTCTGGAGTACACAGCTGGCACTTCCAGCCTAAAGCCCTGTCCCTTTTCT
A_30_P01024879	0.891513	1.85512	up		lincRNA:chr17:95150800-95180650 reverse strand	CGTACCTGTTGCTGTTTGCCTATAGTTCCTCACTGAATTTCCATTCCTTTCTACCTAACA
A_52_P177847	0.890956	1.85441	up	Tril	Mus musculus TLR4 interactor with leucine-rich repeats (Tril), mRNA [NM_025817]	AGGATTAGCCTCTTGTATTTGTTTAGTTGTGTTTTTAGCTATTTGGGATACTTTTCTCCC
A_55_P2045535	0.890517	1.85384	up	Rsg1	REM2 and RAB-like small GTPase 1 [Source:MGI Symbol;Acc:MGI:1923416] [ENSMUST00000097813]	AACGGTGACAACATCCTGGGTAGAGGCTGGTACTGGCGATCCTCACTTCTATCCTGAGGG
A_52_P563450	0.889276	1.85225	up	Brix1	Mus musculus BRX1, biogenesis of ribosomes, homolog (S. cerevisiae) (Brix1), mRNA [NM_026396]	CTAGACATATATGTGTTACCCATTCAGAGATAGTTCAGTTTTTGTGTTTCTAGTATGGTG
A_51_P471312	-0.889021	1.85192	down	Kcnb2	Mus musculus potassium voltage gated channel, Shab-related subfamily, member 2 (Kcnb2), mRNA [NM_001098528]	ACTGCCAGCACAAACTACAAAGTGTATTGTTTAAGGGGGGAAAAAATCTAAATTTTGTTC
A_30_P01020439	0.888261	1.85094	up		lincRNA:chr12:3173375-3203075 reverse strand	ATCCACATCCCAGAACTGTTTGTATTCTGTCTTTACACCTTTGTTCAAAGCCCAGGCAAT
A_55_P2018307	-0.88728	1.84969	down			TTGTAAAAACCGTATTTGTTTCAGGAGATTAGAGGGACATAAACCGGCCCCCTCGATGTT
A_55_P1954658	-0.885836	1.84783	down			ATCAACCGGGCCATGGAAGATAAGGAAGAAGTGGTTGACATGATAGACTCTGTGTACCTT
A_30_P01019463	0.885034	1.84681	up		lincRNA:chr1:138528250-138538250 forward strand	TTCTTTCATTGTACAAGAACTATTTGTGGATATGTACTGACAGATAGGCAAGCAAGCACA
A_55_P1958845	0.885028	1.8468	up		RIKEN cDNA B230314M03 gene [Source:MGI Symbol;Acc:MGI:3588233] [ENSMUST00000097930]	GTAGCATGAGGTCTGTCCCACCTTTTGTGTTTGTTGAGACAGGGTCTCACTATGTAGCAT
A_30_P01026409	0.884811	1.84652	up		lincRNA:chr12:33808493-33829143 reverse strand	TCTGATTGAAGCTGTATCGGCAGAGCTCTGGTGAGGGTGGCCAGGGGATCCCAGGCAGTG
A_55_P2071906	0.883485	1.84483	up			AACACGGAGTTTCATCACCAGAACCTCATTATGTCTGTGCTCGATCTCTTCTTTGCTGGA
A_55_P2105346	0.883231	1.8445	up	Tmed5	Mus musculus adult male olfactory brain cDNA, RIKEN full-length enriched library, clone:6430594K11 product:hypothetical protein, full insert sequence. [AK078317]	CCACCACCTGGCTATGTTAAGTATGTGTTTGCTGAGATAATATTCAGTACAATTAAAACA
A_30_P01017481	0.88279	1.84394	up		lincRNA:chr2:143988645-143993945 forward strand	TAAGGATTTAGGGATGACTACAGGAGGGTGGAGAGCTGCCACGTTCCAGTCCTGGAGGAG
A_51_P313581	0.881826	1.84271	up	Fabp2	Mus musculus fatty acid binding protein 2, intestinal (Fabp2), mRNA [NM_007980]	AGGCTCATTCGTCATCCTATCAGCACTGGTCTCCAGCCTTGTCAAAGCTAAAGAAGTAAA
A_30_P01028060	0.880908	1.84153	up		lincRNA:chr15:59059450-59070576 reverse strand	TTATTTTATGCTGAATTTATTCCCGGGCCATGAGTTTTTGTTTCTTCAGTTTCTTCTGGG
A_30_P01032606	-0.880819	1.84142	down		lincRNA:chr7:30645026-30667034 reverse strand	TTGAGTTGAAGTTAGAGATAGTGAAACATGTAAGTTTTGGGACTCTGTGACAAATCAGTT
A_55_P2061432	0.88019	1.84062	up	Scgb2b2	Mus musculus secretoglobin, family 2B, member 2 (Scgb2b2), mRNA [NM_207262]	TGATCTGAGTGCCATCTTGCTGACCTTTCTTTCTCTCTGTAAGTTGGATTCCTGACACCT
A_30_P01027393	0.880175	1.8406	up		lincRNA:chr1:138570107-138632310 forward strand	TTTGTTTCAGAAGCTGTGTGGTCCCTGGAAGAACTTAGAGCTTCAGTCATGTGGTTTCCA
A_66_P102374	-0.880154	1.84057	down	Calb1	calbindin 1 [Source:MGI Symbol;Acc:MGI:88248] [ENSMUST00000029876]	GAAGTAGCAGTTCCTGATGAGGAATAAGGGTGGGGTTTCTGGATTCTTGGCAACATTCTA
A_30_P01022698	-0.878948	1.83903	down		lincRNA:chr2:143988645-143993945 reverse strand	CCCAGGGAAGCAAAGCTGACCAGTCTAAAAGGTGTTTAAACTAGCTGATAATTTTTAACG
A_55_P1953508	-0.878825	1.83888	down	Mob3c	Mus musculus MOB kinase activator 3C (Mob3c), mRNA [NM_175308]	ACAGGGGAGGGGGGAGGAGGGAAATCTATTTTTGTGAAAAGAAAGATTTTGCTATTTTTT
A_55_P1991244	0.878507	1.83847	up	Chrna10	Mus musculus cholinergic receptor, nicotinic, alpha polypeptide 10 (Chrna10), mRNA [NM_001081424]	AAACAGAAGGCTGTGCAGACATTTGACTCGGAGCTTCGATCCATAATAAATGAGTGCTCC
A_30_P01027463	-0.877395	1.83706	down		lincRNA:chr5:34696192-34722842 reverse strand	GCTTACCTCGAAGTAGCCTCCGGCGGCACCGCCCGCACCCGCGCCCAGAGGCCCGTGGGC
A_30_P01018268	0.875569	1.83473	up		lincRNA:chr13:98571741-98603323 forward strand	TCTGGCAGTTCTATGGTATTGTGATTTTAACATGCTTCCTGCCTAAATACTGTAGCCTTG
A_55_P2006842	-0.875421	1.83454	down	Olfr1158	Mus musculus olfactory receptor 1158 (Olfr1158), mRNA [NM_146645]	GCTTAACCCCTTGATATACAGTCTCAGGAACAAAAATGTCAAATTCGCCTTTAGAAAAAT
A_30_P01025091	-0.875295	1.83438	down		lincRNA:chr6:125330524-125410249 forward strand	ATATTAGAAGTAGTTATGAAGGTGGGGGATCCTCATTCCTCTGGTCATCGCCATGGTGAA
A_55_P2142928	-0.87464	1.83355	down	Cadm2	Mus musculus cell adhesion molecule 2 (Cadm2), transcript variant 1, mRNA [NM_178721]	ATTATCAATGCTGAAGGCAGCCAAGTCAATGCCGAAGAGAAAAAAGAGTATTTCATTTAA
A_55_P2157867	-0.873628	1.83226	down	Nlrp4d	PREDICTED: Mus musculus NLR family, pyrin domain containing 4D (Nlrp4d), mRNA [XM_001481310]	AAACCTGCTTGAGCATCAGAAGCTGTGTACAAACAGAAGCAGAAAACAAGGGTGGTCATC
A_30_P01027572	0.872891	1.83133	up		lincRNA:chr7:113768215-113783490 reverse strand	CTTCTCTCTGAGATAAATAGTTTCACACAGCTTTCCTTCCTAGTGAAATTCCCTGTTTTG
A_30_P01021011	-0.872701	1.83109	down		lincRNA:chr3:78982395-79094345 reverse strand	ACTGACTTAGGGATGGCAAGAGGCAGACCTGGGAAGGAAGGTACCAGTGGGCTGTTCTTG
A_30_P01032110	0.87239	1.83069	up		lincRNA:chr5:31862823-31871445 forward strand	TCTATTTGCTTTTTAGTGTAAGATGCCTTCTCGGCCATCTTGGTCTCCTAGACACTGACC
A_51_P411045	-0.871597	1.82969	down	9530080O11Rik	Mus musculus RIKEN cDNA 9530080O11 gene (9530080O11Rik), transcript variant 1, long non-coding RNA [NR_045776]	TTCTATGCCTGCTGAATTTGTAGGAATAAGAAGCTGAAAGAATGAGAGTTGGCAAGAAAG
A_30_P01020238	-0.871358	1.82938	down		lincRNA:chrX:102232535-102265435 reverse strand	GCATTTCTTAGCTGTAATTTATATAATTGCCTGCAGGTGGTAGCAAAGCAACACAAAAAA
A_30_P01030160	-0.871309	1.82932	down		lincRNA:chr17:15226181-15250333 forward strand	TTCATGTCTGAGGCTGCTGAAACAAAAAGGAGACACAGAAACAAGGCATTCATAAGGCCC
A_55_P2166069	0.870475	1.82826	up	2310079G19Rik	Mus musculus RIKEN cDNA 2310079G19 gene (2310079G19Rik), mRNA [NM_027173]	AATTACAGCAGCTTTCAGCCCTACTCCTCTTCCTTGAGTGGCTGGCGTTATCATTACTAA
A_55_P2040081	-0.870003	1.82767	down	Gm6880	Mus musculus predicted gene 6880 (Gm6880), mRNA [NM_001099305]	CCCATCCCCAGCAAGTGATGGTTCAGCAGGAGTTCACAGCGAATGACAGTATCCTGGCTG
A_30_P01024666	-0.869839	1.82746	down		lincRNA:chr12:53669892-53710742 forward strand	AATACAGATTTACCAACTGATCCAAGTCTTTTTAATTATCTATATTTCCTCACTAGATCA
A_66_P105175	0.869459	1.82698	up	Bche	Mus musculus butyrylcholinesterase (Bche), mRNA [NM_009738]	ACTTCCCATTGTGGACTGTTATCTCTCTGAATCATATGCACAAAATAAAAACTTCCTTGT
A_55_P2052145	0.869364	1.82686	up	Ly6g6d	Mus musculus lymphocyte antigen 6 complex, locus G6D (Ly6g6d), mRNA [NM_033478]	AGACAAACACTCCCTTGTGTGCCGTTAAAATTGATGAACTATTCTAGAGAGGACTGTAAA
A_30_P01020032	-0.868909	1.82628	down		lincRNA:chrX:50400250-50410825 forward strand	TTCGCCCGCTCGCTCGGAGGCCCCGGAGCGGAAGGGGGGAGGGGGGAGGCCGTGCGGACA
A_52_P192084	-0.867647	1.82468	down	Agbl4	Mus musculus ATP/GTP binding protein-like 4 (Agbl4), transcript variant 1, mRNA [NM_030231]	AGATGTACAATGACCCAAAAACAAGCCTGGAGTTCTATATTGACATCCACGCTCACTCCA
A_55_P2340593	0.867026	1.8239	up	1810019D21Rik	Mus musculus RIKEN cDNA 1810019D21 gene (1810019D21Rik), transcript variant 1, long non-coding RNA [NR_040344]	ATTCATTCGACTCTGGTTCTCTCAACCAGGCATTCCCCATATTAAAACAATTCCAGAACT
A_30_P01032921	0.865616	1.82212	up		lincRNA:chrX:130742592-130744509 reverse strand	CTCGAGCTATGCATGTTTGGAGTCCATTCCTTGCTCTGCTTTTTACAGTATCCTTATGTG
A_30_P01029717	0.865586	1.82208	up		lincRNA:chr18:36072785-36076426 forward strand	TTGTCTTCCTTCCTACACTCCTCCCGTTGGAGGGATGTATATACTCATAAAAGAGGGTGA
A_66_P139052	-0.865107	1.82147	down	Nhlrc4	Mus musculus NHL repeat containing 4 (Nhlrc4), mRNA [NM_001039038]	ACCCCAGGGCCAACTAGTGGTGGCAGATGCAGGGGACAACTGCATCAAGTTGTACCAGTA
A_30_P01020187	-0.864727	1.82099	down		lincRNA:chr1:153685487-153710962 reverse strand	CGACTGAAAAGGATTTTGTAAAGCGTTGTTTGCAAAAATTAGAGAACTGGGGGGCGGGAG
A_51_P163261	-0.864266	1.82041	down			AAGGGGAAAGCCAATGCCAGTGAGGATGCAAATAATCCTGCAGAAAATGGAGATGCCAAA
A_51_P185247	0.863399	1.81932	up	Gdf10	Mus musculus growth differentiation factor 10 (Gdf10), mRNA [NM_145741]	CTACACGTGCTTTTATACATGCAGTATGCACATGTAATCACGGTTGATTTCTTCTTTTAA
A_66_P114784	-0.863322	1.81922	down	Pla2g7	Mus musculus phospholipase A2, group VII (platelet-activating factor acetylhydrolase, plasma) (Pla2g7), mRNA [NM_013737]	GTACTACCCAGCTCAAGATCAAGGTCGCCTCGACACTGTTTGGATCCCAAACAAAGAATA
A_55_P2088720	-0.863212	1.81908	down		Mus musculus adult male urinary bladder cDNA, RIKEN full-length enriched library, clone:9530030H05 product:unclassifiable, full insert sequence. [AK035396]	TAGAGAAAAATGAGCTTAAAAATCCGGAGCAAAAGAGGGGTGGTCCCTGAGAAGTCAGTG
A_55_P2126207	0.863159	1.81902	up	1600014K23Rik	Mus musculus RIKEN cDNA 1600014K23 gene (1600014K23Rik), mRNA [NM_028046]	AGAAGCTTCCCCTGTCTTTCTGTTTGGCATTCTTTGCAATAAATTTGTTTGTTTCTAAGC
A_30_P01026273	0.862951	1.81875	up		lincRNA:chr4:21683562-21694344 forward strand	TATTGCTGTGTCCATAGCCTTCTTACTTCTCACTCCAGCTAAACAAGAGAACACCAGACG
A_55_P2064831	0.862652	1.81838	up	Gm10561	PREDICTED: Mus musculus predicted gene 10561 (Gm10561), misc_RNA [XR_168381]	ACTGGATACAAAAGATGACTCAACAGGAACATATGGGACGATATCCTGGATGGTTTCGAG
A_51_P215190	-0.862596	1.81831	down	Efcab11	Mus musculus EF-hand calcium binding domain 11 (Efcab11), mRNA [NM_030172]	AGAGGAACCTAAGAGATGGGATAACTAAATGTAATTTGACTGAAATGTAATTTGGTCTCC
A_30_P01027927	-0.862122	1.81771	down		lincRNA:chr13:64018565-64082570 reverse strand	TTTTAAGGATCTTTCCCATAAACCTTAGCAACAACTTAGGCTCAGGTTTCACTGGCCCTA
A_55_P1989921	-0.860774	1.81601	down	Eml2	Mus musculus echinoderm microtubule associated protein like 2 (Eml2), transcript variant 1, mRNA [NM_028153]	GGGACGAATGGGCCACCATGCCTTGTGGGAGCCATTGGTGTTTGGTTTGGGGTATTTTTT
A_30_P01031881	-0.860752	1.81598	down		lincRNA:chr13:56851404-56851796 reverse strand	TAAATTTGTACACGGAGGTCCTGATTCCCAGAGTGGCTGCACTAACACTATGGAATTGGA
A_51_P355301	0.86062	1.81582	up	Cyp3a11	Mus musculus cytochrome P450, family 3, subfamily a, polypeptide 11 (Cyp3a11), mRNA [NM_007818]	AAGGCACCTCCCACGTATGATACTGTGATGGAGATGGAATACCTGGATATGGTGCTTAAT
A_66_P132840	-0.860397	1.81554	down	9430077A04Rik	Mus musculus 12 days embryo spinal ganglion cDNA, RIKEN full-length enriched library, clone:D130058I18 product:hypothetical protein, full insert sequence. [AK051584]	ATTTCTCTTTAGCAAAAGCAATTCCAGTAAACACCACTTAAATCCATAACAACAGGGGCA
A_55_P2020242	0.860212	1.81531	up	LOC101056474	PREDICTED: Mus musculus heat shock protein beta-7-like (LOC101056474), mRNA [XM_003946335]	TACAGTCCCTCTCCAACCTAAGGGTCACAGAACCTGTCTTTGGGGACCATGCCATGGCAC
A_30_P01025614	0.860179	1.81526	up		lincRNA:chr17:74595885-74597555 reverse strand	GCTATTATTATAGTTACCATAGCTTGCTTTGGAAGCATGTAGTTCATTCTCCTAGATAAG
A_66_P125161	0.859913	1.81493	up	1700057H15Rik	Mus musculus RIKEN cDNA 1700057H15 gene (1700057H15Rik), long non-coding RNA [NR_040774]	ATGGCGAGGGGGATGCTTTTCCTTCCTGCAGTCTTCCCTTTCTGCAGATGAATAGGAACG
A_55_P2178720	0.85974	1.81471	up			AGCACTCATGTTGTTTGGAAATATAGTGAGGAATAGAGTCAAGGCATTGGCCACAGCCAT
A_55_P2102065	-0.859584	1.81452	down	Gm10639	Mus musculus predicted gene 10639 (Gm10639), mRNA [NM_001122660]	GCCACAGATACTGGCCTCTAATGGTTTGCAATTATAAAATACAATTGTTGATTTGGCTAT
A_30_P01025249	0.859227	1.81407	up		lincRNA:chr9:41184479-41240162 forward strand	TGTCATGCATGAGCCCTGACTTCAGCCTGTGGTATTTAAGTACATTAAAACTTAATACTG
A_66_P129545	-0.85908	1.81388	down		UI-M-GI0-chg-b-19-0-UI.r1 NIH_BMAP_GI0 Mus musculus cDNA clone IMAGE:30536778 5', mRNA sequence [CF535018]	GTAACATCCCAGGTGATTGAAGCAATTTGCAGCCATTAGAAGAGGCTCCACGTGTCGCTC
A_30_P01017619	0.859049	1.81384	up		lincRNA:chr5:111602486-111603075 forward strand	CCTGCAAGACTGAGTGACAGAGATGGCCAAGACCACCCCAGCACAAATGCTGTGTTCCAC
A_55_P2183672	-0.858812	1.81354	down	Pebp1	Mus musculus phosphatidylethanolamine binding protein 1 (Pebp1), mRNA [NM_018858]	GTTGTGTAAAGCATGCTGTTCCCCCCGCCCCCTTGCTACCCTCTCATTGGGAGTTCTTAG
A_55_P2006604	-0.858577	1.81325	down	2810474O19Rik	Mus musculus RIKEN cDNA 2810474O19 gene (2810474O19Rik), mRNA [NM_026054]	GAATAAAAAGTACAAAAGAAGACTGGTTAAAATGCATCCCTACAAGGACAAAGATGCCTG
A_55_P2056619	0.857398	1.81177	up		predicted gene 20478 [Source:MGI Symbol;Acc:MGI:5141943] [ENSMUST00000173648]	ACTAGATGAAAGGCAGATTTTCACCCAGGCAGTCTGGCTTTGTCACCTTTAAAGCAAGCT
A_55_P2152240	0.857389	1.81176	up	Gm10383	Mus musculus activated spleen cDNA, RIKEN full-length enriched library, clone:F830111N13 product:hypothetical protein, full insert sequence. [AK156988]	AATCTTTCTCACCAGGTCTGGCAAACCAACTGGCATCCTCTTCTTTGCAGTTGTTTGTGA
A_30_P01026859	-0.855959	1.80996	down		lincRNA:chr1:82892851-82943201 reverse strand	AGTACCCCCCATAGAACGGGTATTTAATTTACAGAACAAATGATCTTATGGGAGATGACA
A_30_P01028476	-0.855832	1.8098	down		lincRNA:chr4:147105275-147171025 reverse strand	AAGTCAATCCTTCCTCGAGTGCGATCATAATATTTGAATAGATTGTTGATCCATATCAGA
A_55_P2098408	-0.855116	1.8089	down	Olfr630	Mus musculus olfactory receptor 630 (Olfr630), mRNA [NM_147098]	GATGTCAACAAAAGCAGTAACAAGTCAACAAACATCACAGGAAGTTTCTGAAGGAACATG
A_55_P2094314	-0.854636	1.8083	down	Olfr286	Mus musculus olfactory receptor 286 (Olfr286), mRNA [NM_001011779]	TACATGACATTCCGAGGTCCGTTCTGCAGAGAAAACCACATAGAGAACTTCTTCTGTGAG
A_30_P01026522	-0.854271	1.80784	down		lincRNA:chr9:100977450-100989325 reverse strand	AGCGATGCAAAAAGCAAAGGTTTTCAAGTTCCAAGCACCGTCCACAATCACCATTTTCTA
A_55_P2059732	0.853737	1.80718	up			ATTGCCATGAGAGCAGCTCAGTCAATGTCTAAGAATCGATGTCCTCTTCCGTCTAACATG
A_52_P265937	0.85343	1.80679	up	Tagln3	Mus musculus transgelin 3 (Tagln3), mRNA [NM_019754]	CGGAGAGGATTTTCAGAGGAGCAACTTCGCCAGGGACAGAATGTCATAGGCCTGCAGATG
A_30_P01020518	-0.853402	1.80676	down		lincRNA:chr9:78104935-78116974 forward strand	ATGTGAAGAAGTTTCTACAGCCTGGCAGCCAGAGAAAGCCTCCCATGGATGCAAAACAAA
A_30_P01028561	-0.852432	1.80554	down		lincRNA:chr17:38132217-38157667 forward strand	TTGAGGAGCAAGAGACGAATAACATAAGCTGTGATTAGGAAGTGTCATGTTTAGGGAACA
A_51_P307082	0.852362	1.80545	up	Hey2	Mus musculus hairy/enhancer-of-split related with YRPW motif 2 (Hey2), mRNA [NM_013904]	CCAGAGGCTCATTGACACCAACTCAAAAACTCTTCAGTTTGCAAGAGTTTGGGTTAATTT
A_30_P01030978	-0.850652	1.80332	down		lincRNA:chr6:131263850-131314850 forward strand	CTAGAATTACTTCTCAGACAAAGGATTCTGACTTTGTGTTTCTGAATGTCACAGAACCTG
A_52_P305053	0.850473	1.80309	up	B330016D10Rik	Mus musculus RIKEN cDNA B330016D10 gene (B330016D10Rik), long non-coding RNA [NR_030695]	GTAAAGCTTATGATGACAGACTGAAAAGGTCAAAACATGTTGAAGGAACCAATCGGGATT
A_30_P01029648	0.850292	1.80287	up		lincRNA:chr11:3538125-3554450 reverse strand	CCAGACATAGAAAAATGTTCACAATGGGTAAAGCAAAACAGTTGATAGAAGTGTATGGTG
A_55_P2294626	-0.849947	1.80244	down		RIKEN cDNA 2310043D23 gene [Source:MGI Symbol;Acc:MGI:1919181] [ENSMUST00000149702]	CCATTGGAGGGTTTAAAAAGGGCAATGGCTTTTGACATTAAACTTCTAAAAAGCATCATT
A_52_P673863	-0.849888	1.80236	down	Cdkn1b	cyclin-dependent kinase inhibitor 1B [Source:MGI Symbol;Acc:MGI:104565] [ENSMUST00000067327]	ATTAGCCAAGCAACCATAAGACTCTAGTCAAAAGCACTCGTGCAGATATGCTGCATATGA
A_30_P01020951	0.849085	1.80136	up		lincRNA:chr1:167797581-167803031 reverse strand	TCTAAGAACTACAGGAGGAAACAAAATGTTCTCACACGGGTGTGACAGTGTCTCTGAGGA
A_30_P01029735	0.848955	1.8012	up		lincRNA:chr5:121669792-121732542 reverse strand	GGATGAGTCCGTCGTGCAGAAAGATGGTCTCCTCCTTCACCGAGAGCCACTGCGCCGAGT
A_30_P01028759	0.848824	1.80103	up		lincRNA:chr8:18895366-18925423 forward strand	TGCCTTTATGCTTGTTACAGTGACTCACCCTGTGGCAGAGTTCTCTAATCCAGAAGATCT
A_30_P01031494	0.848568	1.80071	up		lincRNA:chr6:52046805-52072744 reverse strand	TTCCTTTCCTTGGTGACATTTGTGACTTCACTCATATTTTCTTGCCTGTGGATCAAACCA
A_55_P2038179	-0.848336	1.80042	down			CCAGAAAAGGTGGTTCCAAATAGTTCAGAAAGGTTGTTTACCAAATTCTAGCCAAACCTT
A_66_P131494	0.848111	1.80014	up	LOC668306	H3127H05-5 NIA Mouse 15K cDNA Clone Set Mus musculus cDNA clone H3127H05 5', mRNA sequence [BG086570]	GACCCTGATAATGCTATGGGAAGGGTGACCTCAAACAGCTACCTGTTCTTCTAGGCTAAC
A_55_P2011506	-0.848011	1.80002	down	Pcdh9	Mus musculus protocadherin 9 (Pcdh9), transcript variant 2, mRNA [NM_001271798]	AGGAACCAATTCAATGACCGTAAGCAGTATGGCTCCAATGAAGGCCATTTCAACAATGGC
A_55_P2083283	0.847905	1.79989	up	Olfr1062	Mus musculus olfactory receptor 1062 (Olfr1062), mRNA [NM_147078]	TTTCTGGTTTTCATGGTATCAGAGATCTTCATGCTGGCTGTGATGGCCTATGACCGCTAT
A_51_P113588	-0.846439	1.79806	down	Oit1	Mus musculus oncoprotein induced transcript 1 (Oit1), mRNA [NM_146050]	AAAGCCCATATGAGCAGTTCTTAAAGAACAACCCAGAAACAAACAAATATGACGGATGGC
A_52_P413134	-0.845528	1.79692	down	Igbp1b	Mus musculus immunoglobulin (CD79A) binding protein 1b (Igbp1b), mRNA [NM_015777]	TAGGTGGATTAGCATCAGCCTGGATGAGATCGAGAACATCGAACAGGAGATAGAGATCCT
A_30_P01022060	-0.845166	1.79647	down		lincRNA:chr15:73227424-73257474 forward strand	AGGAAAACTCTTGACATCACCTGGAAAGAAGTCAGGACAACAGAAGATGACACAATCCCT
A_51_P108334	0.844727	1.79592	up	Slc25a4	Mus musculus solute carrier family 25 (mitochondrial carrier, adenine nucleotide translocator), member 4 (Slc25a4), mRNA [NM_007450]	CCAATGTACTGAGAGGCATGGGTGGTGCTTTTGTATTGGTATTGTATGATGAGATCAAAA
A_30_P01032163	-0.844684	1.79587	down		lincRNA:chr9:20311197-20325858 reverse strand	ATAAGCCAGACCTGAAATAAACCAGTACCTCCAGTACCTCCAATAAATGAAATAGAAGAG
A_55_P2158522	-0.844155	1.79521	down	Pbx1	Mus musculus pre B cell leukemia homeobox 1 (Pbx1), transcript variant a, mRNA [NM_183355]	CCTGCTCTCTGTTATAGACGCCCGGTCCCTGCCCTCTATGACTTCACTGAAGGATTTTTT
A_66_P131931	0.843994	1.79501	up	Aurkc	Mus musculus aurora kinase C (Aurkc), transcript variant 2, mRNA [NM_001080966]	GTGAGACATATAGACGCATCCGCCAGGTGGATTTTAAGTTTCCTTCATCAGTGCCTGCAG
A_30_P01018494	0.843028	1.79381	up		lincRNA:chr6:57583950-57624216 reverse strand	TGCAACCTGAAGTGCTTCCTTCATCCTTCGCATTGAGGAATACTTAGGTAGGTCTAGCAT
A_30_P01027524	-0.842704	1.79341	down		lincRNA:chrX:150159252-150181275 reverse strand	ACGCACCAAGGAAATGAAGCCATACTGCAGTCCCTCACAAACTGGAAAACAGTAAAAGAA
A_30_P01029039	-0.841506	1.79192	down		lincRNA:chr8:50456266-50587338 forward strand	TGAAAGAATGGAACAAGACCAGATGCTGCAGGAGTGGGAATGGATAGTCAAACATATCCG
A_30_P01022648	-0.84138	1.79176	down		lincRNA:chr14:33923944-34003394 reverse strand	AGAGTAATAATATCATGGTCAGGCAGGAAAGGCAACCACACTTTTTGTCCTGAGCAGCTG
A_66_P118124	0.84128	1.79164	up	Fxyd3	Mus musculus FXYD domain-containing ion transport regulator 3 (Fxyd3), mRNA [NM_008557]	GAGGTTGTTCTGAGCCTGTTGGTCCTTCTAGCAGGCCTGCCTACTTTGGATGCCAATGAC
A_30_P01024406	0.841206	1.79155	up		lincRNA:chr18:46646048-46659873 reverse strand	CACCTCTGGGTATTTTTCTTTGGTTTTAGATATCAGTACTTAGCATTGTGATCCTCTTTC
A_66_P139805	0.841087	1.7914	up	Crispld1	Mus musculus cysteine-rich secretory protein LCCL domain containing 1 (Crispld1), mRNA [NM_031402]	ATATGTGCTTTGATACTTAAATTCTGTAAAATGTTAGGGTATTTTTTATTCCTGCTGGTG
A_55_P1973858	-0.841039	1.79134	down			AAAGCCAAGGAATAAGAAGTAGTGACCTGAAGCTGGGACTGTTGGAGTGTCATCTTCACT
A_66_P101930	0.840822	1.79107	up	Lce3b	Mus musculus late cornified envelope 3B (Lce3b), mRNA [NM_025501]	TCAAGAAAAGCCCAGCTAGTCTTGTTTTGTCTGATCCTGGACACCCTTCTCTGATTGTCT
A_66_P136813	0.840305	1.79043	up	6030408B16Rik	Mus musculus RIKEN cDNA 6030408B16 gene (6030408B16Rik), long non-coding RNA [NR_033803]	GTGTCAGCCATCCAGCAACAGTTCCAGCATCGCTTCCCACGGCTTTGCCATTAAATAGGC
(+)E1A_r60_a97	0.839466	1.78939	up		Unknown
A_55_P2027047	-0.83928	1.78916	down	Olfr829	Mus musculus olfactory receptor 829 (Olfr829), mRNA [NM_147067]	GAACAGAGACATGAAAGAAGCCTTGAAAAAACTCATCAGTAGGATATTATTTCCTCTATG
A_30_P01019626	0.839132	1.78897	up		lincRNA:chr2:94008913-94019798 reverse strand	ACAAACTGGAGTCTCTCTGCTTAACTCACAACTGCTTCTTGTGATGGAAAGCTAACCCCT
A_30_P01021880	-0.838429	1.7881	down		lincRNA:chr7:7074309-7076554 forward strand	CCCTATGTTACATATATTAAATATCCTGCCACATTGATGTGAAAGGTAACTGATACAGCT
A_30_P01023332	-0.837831	1.78736	down		lincRNA:chr5:108538417-108550517 reverse strand	TTCCATGATCAAAAACTATGACATATCAAATGCCTTAAGAGAAACTGAATGGGACTTCTG
A_52_P576188	-0.837661	1.78715	down	AY358078	Mus musculus cDNA sequence AY358078 (AY358078), mRNA [NM_194347]	CAAGATGAGAAGACAATGTCGGATATGGAAAAAATGACCCAGTCAATAAGTGATACCATT
A_30_P01031029	0.836855	1.78615	up		lincRNA:chr9:30793551-30817648 reverse strand	TGCTTTACCAAGCCCATCTCTCCACACTCTCAAGATAGATTTCTCTCTGTGGTCAGTTAG
A_55_P1976943	-0.836541	1.78576	down	Itgad	Mus musculus integrin, alpha D (Itgad), mRNA [NM_001029872]	GGGGTCAGCATAAATTTACATATGGATAAGAACTAACACAAGACTGAGTAATATGCTCAA
A_30_P01032889	0.836372	1.78555	up		lincRNA:chr7:66926500-66952100 forward strand	GCTGTGGGGCCATTTCCTCTGCATGTTTTCCATGGACCATACTGGAAAGGGAATGCAACC
A_55_P1956537	-0.836002	1.7851	down	Dach2	Mus musculus dachshund 2 (Drosophila) (Dach2), transcript variant 1, mRNA [NM_001142570]	CTACTAGCACATACCTTATCTATAAAGAAGACAATGATAAAAACTGATCCCAGCCTACTA
A_52_P681391	0.835666	1.78468	up	G0s2	Mus musculus G0/G1 switch gene 2 (G0s2), mRNA [NM_008059]	ACAGCCCAGAGCTCAGATGGAAAGTGTGCAGGAGCTGATCCCTCTGGCCAAGGAGATGAT
A_55_P2331661	-0.835366	1.78431	down	C230071I02Rik	Mus musculus 0 day neonate cerebellum cDNA, RIKEN full-length enriched library, clone:C230071I02 product:unclassifiable, full insert sequence. [AK082631]	CTAGACCCAGGTTCCTGTCTAGGAAAACAAGCAAAAGGCAAAACAATAAAAAACAAACAA
A_30_P01021831	0.834987	1.78384	up		lincRNA:chr3:41143423-41359623 forward strand	ATGCTTCAGATCAAATCTCCACTATCAGGAGACGATGGCTGGCTCTCATCTTGCACATAT
A_55_P2021341	0.834431	1.78315	up			ATATGGTGAGATAATATATGGTGGGGCATGGATCCTGAGTGCTTTCCCTGAGCACTCTTT
A_55_P2177910	-0.834263	1.78295	down	Lepr	Mus musculus leptin receptor (Lepr), transcript variant 2, mRNA [NM_010704]	AATTCCCTCGGCGCTTCCCTTGTGAATTTTAACCTTACCTTCTCATGGCCCATGAGTAAA
A_66_P135003	-0.834055	1.78269	down	Gm5531	Mus musculus predicted gene 5531 (Gm5531), mRNA [NM_001008426]	GTAAATGTAATGTCTGACTGCTCTGTGAACTCTAACAATATAAATAAATCATGGGCTTCC
A_66_P118699	0.833406	1.78189	up	Rorb	Mus musculus RAR-related orphan receptor beta (Rorb), transcript variant 1, mRNA [NM_001043354]	TGGTGGGCGCTCCCATGTCACCAGCACAGCCGTACATAGACACTCATGAAGAATGTCTGA
A_55_P2286650	0.83249	1.78076	up	6720462K09Rik	Mus musculus 12 days embryo male wolffian duct includes surrounding region cDNA, RIKEN full-length enriched library, clone:6720462K09 product:unclassifiable, full insert sequence. [AK032850]	TGACTAGCCTATTTCCATACATAATATTAGTATCCCGATTCCTTTCTAAACTTCTCTGGC
A_55_P2060198	0.832476	1.78074	up	Mcf2l	mcf.2 transforming sequence-like [Source:MGI Symbol;Acc:MGI:103263] [ENSMUST00000156405]	AACGTCTCTCCAGTTTGGGTGGCTGGATCCCCTTATGTTTGTTTGTCTGAGACTGACTGA
A_55_P2205356	-0.832422	1.78067	down	2700079J08Rik	AGENCOURT_10730846 NIH_MGC_152 Mus musculus cDNA clone IMAGE:6749987 5', mRNA sequence [CA459121]	GATCATAGGCGACAAGAATAAATGGTAAACCTCAACAAGAGAAGTGTAAACACACATGCG
A_30_P01024724	-0.832287	1.78051	down		lincRNA:chr13:73472571-73483846 reverse strand	ATGGAAGAGTGGGCTTCTTCTATAAAAATTCTCTGCTTGCTCCTCTCCTCTCCCAAGTGA
A_51_P504354	0.832241	1.78045	up	Nrarp	Mus musculus Notch-regulated ankyrin repeat protein (Nrarp), mRNA [NM_025980]	TTTTTTGAATCTTGGTTATGAACCCAATTTTAAAGGGCGTTGTATCCAGCGTTGTGAAGG
A_55_P2146008	-0.83118	1.77914	down			ACTTGATGACTTAACGGTGAGCAGCCAGCAGCAGTGGCCTGCGTTCAGAGCTCCTCAGAA
A_30_P01025615	0.830584	1.77841	up		lincRNA:chr1:161992257-161992963 forward strand	CCCAGTCTATGGTACAGAAGAAACTGACTGCCTAGATATTTTCAATTCATACTTAGATAT
A_51_P263844	0.830492	1.77829	up	Zfp449	Mus musculus zinc finger protein 449 (Zfp449), mRNA [NM_030139]	CAAGTCTGCATGGATTTTCATCCTGCTTCAGGATTCTCTCTGGTTTATTTCAATGCTTTT
A_52_P612137	0.830229	1.77797	up	Runx1t1	Mus musculus runt-related transcription factor 1; translocated to, 1 (cyclin D-related) (Runx1t1), transcript variant 3, mRNA [NM_009822]	CCTAGTTGGTGAGAAACCTGTATCTTTCTATGCTGCTTTTATATCTGTATGTATTAGTGA
A_55_P2165489	0.83006	1.77776	up		predicted gene 10643 [Source:MGI Symbol;Acc:MGI:3642507] [ENSMUST00000098592]	TTACAGGAAGAATGCTTGTGCGAAGGGACCTAGAAGACTTGGTTGTACTTCCCATCATTC
A_30_P01023918	-0.829259	1.77677	down		lincRNA:chr13:81773237-81783062 reverse strand	AAGCTTTATCCTCTTCAGGGGGCCTAGAAAGATCTACTGAGGAGAATTATAGGGGTCATT
A_55_P2106345	0.829082	1.77655	up	Arid4b	Mus musculus 8 days embryo whole body cDNA, RIKEN full-length enriched library, clone:5730472C19 product:hypothetical protein, full insert sequence. [AK161669]	GCTTAGAAACTTAGTAAAGATTGGGATTTTTACTTGAGGGATGTCGATCCATTTAGCTTT
A_52_P551851	-0.827698	1.77485	down	Tspan11	Mus musculus tetraspanin 11 (Tspan11), mRNA [NM_026743]	TGTCTTAGAGATCACTCTCCATAAAGATGGGAGTCACACCATGTGGGGATCACACTGTAT
A_55_P2318934	-0.826554	1.77344	down	1200007C13Rik	Mus musculus adult male lung cDNA, RIKEN full-length enriched library, clone:1200007C13 product:hypothetical Prenyl group binding site (CAAX box) containing protein, full insert sequence. [AK004627]	GGTACTCATAAATGCCCATAGGCGCGCACACATTCACATATAAATGCAAAAATAATAAAT
A_51_P239994	-0.82622	1.77303	down	Sim1	Mus musculus single-minded homolog 1 (Drosophila) (Sim1), mRNA [NM_011376]	TAAATAGCTTTCTGAAGTAAAATTGAAGTTAATGTGCATAAAATGTATTTATTATGTGAG
A_30_P01030639	0.825968	1.77272	up		lincRNA:chr1:161992257-161992963 forward strand	TTCTTTACAGCCAGTTGCACAGTCAAACATTTTATATGAAAATTCTGTATGGTTAGTGGC
A_55_P2018532	-0.82591	1.77265	down	Mob3a	Mus musculus MOB kinase activator 3A (Mob3a), mRNA [NM_172457]	GCACTTCTACTACTTTGTCACCGAGTTCAACCTCATTGACCCCAAAGAGCTGGAGCCCCT
A_55_P1997525	0.825482	1.77213	up	Arpp21	Mus musculus cyclic AMP-regulated phosphoprotein, 21 (Arpp21), transcript variant 5, mRNA [NM_001177617]	GCCTCAGTCCAGTACAGTGCTCAGCGGAGTCAGCAAATACCACAGACCACACAGCAAGCA
A_51_P220934	0.824906	1.77142	up	Vstm5	Mus musculus V-set and transmembrane domain containing 5 (Vstm5), mRNA [NM_026955]	CATCCTCCCTCATACGAAGTTACCTGAGTAGCCTAAACTTGGGTTACTATGAGAAAAAGG
A_30_P01020885	-0.82359	1.7698	down		lincRNA:chr13:3497296-3500441 forward strand	ACCTGAGGAAACCATCTTGGGTAACCAAGGCAAGGAAAGGGAATATGCAACACCTAGGAG
A_30_P01032459	-0.823509	1.7697	down		lincRNA:chrX:102568332-102587093 reverse strand	ATGGAAAAAACATGGTAAAATGATGGAGAAGAAGAGAAAAACGGATCTCTATCTCTCTCC
A_55_P2005666	0.823299	1.76945	up	Acyp2	acylphosphatase 2, muscle type [Source:MGI Symbol;Acc:MGI:1922822] [ENSMUST00000074613]	ACAACGGTCATCTGCCATCTTCTTACGCATGACCCAGCGCGCTCTTGTCTTGGCTTCTGG
A_55_P2055247	-0.823124	1.76923	down	Chrm5	Mus musculus cholinergic receptor, muscarinic 5 (Chrm5), mRNA [NM_205783]	CGGTGGAAAAAGAAAAAAGTAGAAGAGAAATTGTATTGGCAAGGCAACAGCAAGCTACCC
A_30_P01021839	0.823036	1.76913	up		lincRNA:chr5:124667541-124700029 reverse strand	ATCAAAACCCCAAGCTACAACCTTGGGAAATGACAACGTTGACAAAGAAGTGCCACAGTG
A_51_P334419	0.82275	1.76877	up			ATCCTGCAGCGCATGTGCGAGAGAGCAGAGGGAACGACAGATGGCAGAGCCCATTTCTTT
A_30_P01032257	-0.82253	1.7685	down		lincRNA:chr4:88542373-88589148 reverse strand	TTCAACAAGAAGTCTAGAAATACCTACAGGGAGAAGAATCAAGTATGCATGGGGAAATGA
A_30_P01032000	-0.822226	1.76813	down		lincRNA:chr6:54592523-54593344 reverse strand	AAGAGGATCCATATGAAACTCCTGCAAGAGGAAAGTAGCATACTGTAAGTCCAGCCCACT
A_55_P2167733	-0.822066	1.76794	down	U2af2	Mus musculus U2 small nuclear ribonucleoprotein auxiliary factor (U2AF) 2 (U2af2), transcript variant 2, mRNA [NM_133671]	TTAAAAGAGCTGCTGACATCCTTTGGGCCTCTCAAGGCCTTCAACTTGGTTAAGGATAGT
A_55_P1987146	-0.821621	1.76739	down	Gpr115	Mus musculus G protein-coupled receptor 115 (Gpr115), mRNA [NM_030067]	TCAGGTCAGATTCAGTGTCAGTGGTGGGGTTGGAGATCAAACATGAATGATAATATTGTA
A_30_P01031662	0.821481	1.76722	up		lincRNA:chr7:118248833-118267766 forward strand	AGTTTCCAGTTCCTTTCAGGGAACACTAGGGTCTCCCCTTAGGGGCCTTTTGCTGCCAGG
A_52_P462472	-0.82097	1.76659	down	C77370	Mus musculus expressed sequence C77370 (C77370), mRNA [NM_001077354]	GAAAAAGGTTACTAATGGGTCTTCAGGAGCTACTAAGAATCACAGGTCAGTCAAAGCTGT
A_55_P2044433	0.820924	1.76654	up		RIKEN cDNA 2610203C20 gene [Source:MGI Symbol;Acc:MGI:1917705] [ENSMUST00000181814]	AGCAACAGTTCCTGTGTCTTGCTGCTCCTAAAACTGATGAGTGCTGTGTATGACCAATGA
A_55_P2057202	-0.820777	1.76636	down	Gm3902	PREDICTED: Mus musculus predicted gene 3902 (Gm3902), misc_RNA [XR_140984]	CTTGGGACTTGAAAGTATTTCGACAAAATGCCTTGTATTATCCTAATCATGACGAAAAGA
A_30_P01029053	0.819423	1.7647	up		lincRNA:chr15:102920547-102933472 reverse strand	TACAAGAAGTCCAAATAGTGCCAGGTTGCATTTGTTGAATGAGTGGATGAGGGATGATTC
A_55_P2058528	0.818521	1.7636	up			GCCTACTGTGAATATGAGCAGCCTGGGCAGCTTGTGTGCCAAAGGCAAGCGGTACATCTT
A_30_P01025442	0.818349	1.76339	up		lincRNA:chr4:119406384-119407856 forward strand	CTGAGGTTGTTTGTCCCAGTCAGTGGAAATGGTGTCAGGCACTATGTAAATTGATTTTTT
A_51_P400311	-0.817732	1.76263	down	4930550C14Rik	Mus musculus RIKEN cDNA 4930550C14 gene (4930550C14Rik), mRNA [NM_029247]	AAACATATCCAGGACAATTCAAACCAGGAAATAGCTGCAAGAATCATTCAGAGGGCCTGG
A_55_P2098683	0.817712	1.76261	up	St7l	Mus musculus suppression of tumorigenicity 7-like (St7l), transcript variant 1, mRNA [NM_153091]	GCTCTGGTGATGTGAACTTCTATCGCTTAAACGTTTAAGAGTACAATGCTATAACATTAT
A_51_P420128	0.817127	1.76189	up	Fam219aos	Mus musculus Fam219a opposite strand transcript (Fam219aos), long non-coding RNA [NR_045726]	AGTACAGCTACACACACACCACTTTTCCCGAAATAAATCTTCACGTACTTCCCATGTCCG
A_55_P1973578	0.816122	1.76067	up	Foxh1	Mus musculus forkhead box H1 (Foxh1), mRNA [NM_007989]	AACAAGAGTATCTATGATGTGTGGGTCAGCCATCCTAGGGACCTGGCAGCTCCTGCCCCA
A_55_P1970900	-0.815916	1.76042	down	Gramd2	Mus musculus GRAM domain containing 2 (Gramd2), mRNA [NM_001033498]	TCTCTTTCTAACATGGACACATTTCCCTCTAGCAACCAACAAATGCACGGGAAGATGGCA
A_30_P01025152	-0.815593	1.76002	down		lincRNA:chr16:9249688-9275013 reverse strand	TGGAGAGGATAGGAAAGAAGATATGAGGAAAACAAGCCAAACCTAACTACCACAGCATGA
A_30_P01018233	0.815487	1.75989	up		lincRNA:chr12:82457625-82476325 reverse strand	CTCCTTTGGCAACTCACAACAGTGAGCCATCTGCCAGTCTCAGAGCGGCATGTGGCCTTT
A_30_P01033491	-0.815477	1.75988	down		lincRNA:chrX:6790023-6896433 reverse strand	AGAATCTTGCAGAAAGCAGAATCACACACTTGCATCTCCATCTATACCCTCCTTTAAGTC
A_30_P01029845	-0.815394	1.75978	down		lincRNA:chr3:41143423-41359623 reverse strand	TGACGACCTACAGTTTGCATTGTGGGTGGCATTCATTAACGAGGGCAGTAAAAACATGGA
A_55_P2277895	-0.814894	1.75917	down	4930528G23Rik	Mus musculus adult male testis cDNA, RIKEN full-length enriched library, clone:4930528G23 product:unclassifiable, full insert sequence. [AK015927]	TCTCTTCCCATTGAAAAGCAGCAGCCATACGGTTTCTTCTCAACAAATAAATCTCTTGTG
A_55_P2292801	0.814656	1.75888	up	D430004P15Rik	Mus musculus 13 days embryo lung cDNA, RIKEN full-length enriched library, clone:D430004P15 product:unclassifiable, full insert sequence. [AK084877]	GCTTACACAGTGGACCGTTTGAATTTCAGTGCTCCTAATTATTTTTTCTTCATGGAATAA
A_52_P631356	-0.814626	1.75884	down	Cobll1	Mus musculus Cobl-like 1 (Cobll1), transcript variant 1, mRNA [NM_177025]	GTAGAATCTACTGCTGTCGTCACAGAGCAACAAGACAATATGATAGATAAAGATATTGAG
A_55_P2150422	0.81428	1.75842	up	Fgfr3	fibroblast growth factor receptor 3 [Source:MGI Symbol;Acc:MGI:95524] [ENSMUST00000134610]	ATGTGAACTGCTATGGTACCCAAAGGGAGGTGCTGGCACTCGCCTATCGCGCTCTGTTCT
A_30_P01030656	-0.813848	1.75789	down		lincRNA:chr1:138570107-138632310 reverse strand	ACAGAAGGAAACGCTGGCACATCGGTTCTAGAATAAATTACCACCCTGTGGAAAGACCAA
A_30_P01019442	-0.813669	1.75768	down		lincRNA:chr5:14943275-14944205 forward strand	GCAGAACACTTGCCAGAGAGCTTGATTTCTATAAGGGAGGGAATATTGCTAATTTATGCA
A_66_P115098	0.813567	1.75755	up	Nfia	Mus musculus nuclear factor I/A (Nfia), transcript variant 3, mRNA [NM_001122953]	AATTTTTCTCTCTCTGATTTGGAAAGTTCTTCATACTACAGCATGAGTCCAGGAGCAATG
A_30_P01018461	-0.813107	1.75699	down		lincRNA:chr14:106562325-106660675 reverse strand	GACATTGAGTTTTCCCTCTCATCACAATGGCAATACCATATACAAAATTACAAAGAGACA
A_55_P2151209	-0.813025	1.75689	down	Krtap19-4	Mus musculus keratin associated protein 19-4 (Krtap19-4), mRNA [NM_130873]	GGATATGGCTACAGGCGCCCCCTTTCCTATGGGGGATATGGATTCTCCACCTTCTACTGA
A_51_P366680	0.813017	1.75688	up	Fate1	Mus musculus fetal and adult testis expressed 1 (Fate1), non-coding RNA [NR_003243]	ATTTTGAAGCTCTGGGTACTTTCTCCAAAGTGTCACTTCCTGTTGTATCACTGCATGCCT
A_55_P2357751	-0.810984	1.75441	down	4930552N02Rik	Mus musculus RIKEN cDNA 4930552N02 gene (4930552N02Rik), long non-coding RNA [NR_040661]	GTTGGGTCAGTAGCCTAAACAAGGTCCTCTAATTTAAGAGTTTGGGGAGTAAGCTTTTTT
A_51_P248008	-0.810809	1.75419	down	Olfr1109	Mus musculus olfactory receptor 1109 (Olfr1109), mRNA [NM_146766]	CTGTGATATCTGCTACTCTACTGTCATTGCTCCTAAGATGCTCATCAATATCGTATCAGA
A_30_P01017676	0.810628	1.75398	up		lincRNA:chr2:116798318-116802164 reverse strand	ATTTACTCAATCTCCGGGCTACTAAGTGTAGGGGTGGTCCTTGTTGACTTAAATGAGTCC
A_55_P2150377	-0.810173	1.75342	down		Mus musculus adult male colon cDNA, RIKEN full-length enriched library, clone:9030204C09 product:hypothetical protein, full insert sequence. [AK136433]	CTAGACAGGACAGTATGATTTGGAGGGAGAAACAGATTCTCAAGAAAACTATCCTATGCC
A_30_P01031716	-0.809602	1.75273	down		lincRNA:chr7:50509139-50526856 reverse strand	CAGAGACCTGAAACAGTGACACAGTCCTAAGTGGAAGATCCCAAAGGAAGAAAAGGACAA
A_52_P98752	0.809558	1.75267	up	Arhgef15	Rho guanine nucleotide exchange factor (GEF) 15 [Source:MGI Symbol;Acc:MGI:3045246] [ENSMUST00000108670]	TTGTCCGGCATTCATGTAGACGCATACTAACTATAATACCATACTAACTCAGTGATTGCT
A_55_P2161746	-0.809225	1.75227	down			TGGGCCAATTGTAATAGCTATATGAGAAACCCACTGACTTTAGAGAAAGAAATTGTGATT
A_55_P2368271	0.809139	1.75217	up	3110035C09Rik	Mus musculus 13 days embryo head cDNA, RIKEN full-length enriched library, clone:3110035C09 product:unclassifiable, full insert sequence. [AK014122]	CTTACGTGTGTACGTATGTACCCTTGTGTGTTAGTTTTGTGCAAATAGAATGACATCCTT
A_51_P108384	-0.809065	1.75208	down	Zfp85os	Mus musculus Zfp85 opposite strand transcript (Zfp85os), long non-coding RNA [NR_027969]	CTTGAAGTTCACTGGTATTCCCTCATCTCATAACACAGGAATGAATCTTCCTTTAATACA
A_55_P2012311	-0.809019	1.75202	down		AY714985 STAT3-interacting protein as a repressor {Mus musculus} (exp=-1; wgp=0; cg=0), partial (85%) [TC1584441]	CAGTGGCTTCAAGTGGCTTCAGTCACTGGAAGGGATCAATGGGGGAGAATTTCAGCTCCA
A_55_P2082482	0.807908	1.75067	up			CTGTTTTTGTCTGTCCCTTTTTGTTTAGTCCATAGGTCTGGAGTTTTGATGAATGGCTAA
A_55_P2098423	-0.807417	1.75008	down	Izumo1	Mus musculus izumo sperm-egg fusion 1 (Izumo1), mRNA [NM_001018013]	ATAAGAGCGAGGCAACAGAAAACTAATAAAGATTTGTATTTGACTTACTTTTGGGGACTG
A_55_P2021495	0.807393	1.75005	up			GCCATTCAAGACTTTAGTTCTCTCGCTCTGGCAAACCTATCTAAAGTGTTTTCTGTGATT
A_51_P466221	0.80703	1.74961	up	Amhr2	Mus musculus anti-Mullerian hormone type 2 receptor (Amhr2), mRNA [NM_144547]	ATGAGTAGCTTGTTTGAACTCTCTGTACAGGCCGACATGCGTGTGGCCGACATGCCTACT
A_30_P01032454	-0.80559	1.74786	down		lincRNA:chr17:29378878-29379589 forward strand	AGAAGGGACTTGGCTCAGAGACTGTGTGAGTTAACCCCCTTGATTGCTGAAAATCTTAGA
A_55_P2014978	-0.80541	1.74764	down	Dvl3	Mus musculus dishevelled 3, dsh homolog (Drosophila) (Dvl3), mRNA [NM_007889]	CCCCCAGGAGCCCCTCCAGGGCGTGACCTGGCCTCGGTGCCCCCGGAACTGACGGCCAGC
A_55_P1959146	-0.804641	1.74671	down	Gm13119	Mus musculus predicted gene 13119 (Gm13119), mRNA [NM_001034101]	TAGAGAGTGGACCTGTGAGGAGAAATGACTAATGGAATCATACAGTTGTGCATTTCAAAA
A_51_P496381	-0.80463	1.7467	down	Ptk7	Mus musculus PTK7 protein tyrosine kinase 7 (Ptk7), mRNA [NM_175168]	GCAGATGAACAAGAGCGTTTGGGAGCTTTTGACACTTATATGACCCGCCCCTTTTGTACG
A_55_P2006396	-0.804363	1.74637	down	Defb18	Mus musculus defensin beta 18 (Defb18), mRNA [NM_001039123]	GTGTGGTGCGAGAATACAAAAGAATGGAGAAATTATTGAGTACTCCCAAATATACAACTT
A_30_P01029650	-0.803182	1.74495	down		lincRNA:chr17:15225846-15226766 forward strand	ATGCTAGTCAGCAGGTTGTAATTAGTTAATTAAACGCCTGGGCTGACAGAATGGCCCCAT
A_66_P116657	-0.802586	1.74422	down	Agbl2	Mus musculus ATP/GTP binding protein-like 2 (Agbl2), mRNA [NM_178755]	GACAAGATATGGATTTAGAAGGAAACTGGAGTGACATTCCTTTGTCTGACATTGAATCCA
A_30_P01018064	0.802331	1.74392	up		lincRNA:chrX:138966975-138981525 forward strand	TTGATTAGATGAAACCATTTGCAGCCCTGCGCTGCCGCAGCACCTCTTTGAAGCCCTCAC
A_30_P01024595	-0.801921	1.74342	down		lincRNA:chr9:43542196-43544496 reverse strand	TTTATATTTATGGGAACCAAAGAGGCAGCTCAGCGTTAGAGACCTAGAGATCTGCCTAGC
A_55_P1967733	-0.800961	1.74226	down	Kmt2d	Mus musculus lysine (K)-specific methyltransferase 2D (Kmt2d), mRNA [NM_001033276]	TTGTGATTTTAGGTTTTTGTTTTGTTTTAAATTTGGGGGATTGTGGATTGATGGGGGTAG
A_55_P2157038	0.800714	1.74196	up	Mllt3	myeloid/lymphoid or mixed-lineage leukemia (trithorax homolog, Drosophila); translocated to, 3 [Source:MGI Symbol;Acc:MGI:1917372] [ENSMUST00000134555]	TTCTTGAAGGTGGACACATTACATCTGGTACGAATGCTACCCTCTCCAATTACAGTATAA
A_30_P01024625	-0.800582	1.7418	down		lincRNA:chr9:96964067-96973567 forward strand	CACTTTCTATGGCAACTAGACAGCAGACTCGTTTTCTAAAAGGGGTACAGTAACCAGATA
A_55_P2087147	-0.800217	1.74136	down			CTTCCCTCCAGGTACCATGAGAATGGGAAATATGGTGTACAAAGTGCTGAGATAGACTGA
A_55_P2161214	0.800041	1.74115	up	Thsd7a	Mus musculus thrombospondin, type I, domain containing 7A (Thsd7a), mRNA [NM_001164805]	CATAGTCATGGTCTTTTGCCCTTTTCATGGTTGAAATCTGAATTAGCGTGATTTATTAAG
A_55_P2042879	-0.798684	1.73951	down	Mbtd1	Mus musculus mbt domain containing 1 (Mbtd1), mRNA [NM_134012]	AAGTTCCCAATACAGACTGCAGTCTACCTACCAAAGTCTTCTGGATTGCTGGAATTATAA
A_55_P2096081	-0.798162	1.73888	down	Myo5b	Mus musculus myosin VB (Myo5b), mRNA [NM_201600]	GAGTGGAAGTGCCTAGCTTTGATCTTTGTATATATCTTGAGAATGTTCAAACTGAGATAA
A_55_P2025651	0.797702	1.73833	up		predicted gene 9982 [Source:MGI Symbol;Acc:MGI:3642428] [ENSMUST00000069568]	GAATCTCTCTAGGAACTTCTAGGAATGTGTGTGTTCAAACTTATTGATGTAGAAGAACAA
A_55_P2085546	0.797667	1.73829	up	Dnaja4	Mus musculus DnaJ (Hsp40) homolog, subfamily A, member 4 (Dnaja4), mRNA [NM_021422]	GTTGCTTAACTGTCCCACCTGTACACTTTCCACTTTAAAATTAAAATTGAACTGGTATGA
A_30_P01028807	0.797314	1.73786	up		lincRNA:chr13:37633225-37640309 forward strand	ATCACTTGAGCCAGGCTCGTATTGCTCCTGCATCCCACAGGCTGAGTTCCAAGGGAAGTG
A_30_P01026705	-0.796398	1.73676	down		lincRNA:chr7:140012053-140012509 reverse strand	ATTAACGGAGTGTTTTGGGGTAAGGGAAAGAACATCTGGAACAGGTGGGCCTTTCAAAAC
A_55_P2032718	0.796158	1.73647	up	Klra9	Mus musculus killer cell lectin-like receptor subfamily A, member 9 (Klra9), mRNA [NM_010651]	AAGCTCTTGGAATCCTCTGTTTCCTTCTTCTGGTAATAGTTGCAGTGTTGACGATAAAGA
A_55_P2064635	-0.796018	1.7363	down		MMU12270 pendulin {Mus musculus} (exp=-1; wgp=0; cg=0), partial (14%) [TC1691581]	GCCTTGTGTGTGATAGGCCTGTATCTCTAGTTCCATTTTATTATTATTTTTTGAGACAGT
A_55_P1967325	0.795784	1.73602	up	Fam19a5	Mus musculus family with sequence similarity 19, member A5 (Fam19a5), transcript variant 1, mRNA [NM_001252310]	GATGTTACAGCATATTTCCCCCTTGTTTTACAGTATCCAATTTTTGTGTTGATTCAGCTA
A_55_P2076592	-0.794962	1.73503	down			AAACAGGAGGCCAAAAAGGTGGTCAATCCTTTGAGAAAAGACCCAAGAACTTTGGCACTG
A_30_P01028343	-0.793731	1.73355	down		lincRNA:chr12:88154776-88184372 forward strand	TAACATTGAAGAGGCAGGAAGATCACAAGTTCAAGACCAGACTCAACAATCAAAAACCCA
A_51_P504314	-0.792644	1.73225	down	Prpf38b	Mus musculus PRP38 pre-mRNA processing factor 38 (yeast) domain containing B (Prpf38b), mRNA [NM_025845]	AACATTGATCAGCAGATTAAAACTCGACCTAGGAAAATCAAGAAAGACGGAAAGGAAGGC
A_30_P01020476	-0.792626	1.73222	down		lincRNA:chrX:18744367-18853992 forward strand	CCCAACCCGAGCCTTCATCCCCGCCCCTTTCCCGCCACCCGCGCAGCACTGTTCTGCGCT
A_51_P423976	0.791631	1.73103	up	Crem	Mus musculus cAMP responsive element modulator (Crem), transcript variant 3, mRNA [NM_013498]	TAGATTTTTATAATCGTCACTTTGTAAAGAAAGTATTGTATTGCTGTCCTTGGGTGCCAC
A_30_P01026349	-0.791187	1.7305	down		lincRNA:chr18:75513062-75523889 forward strand	CTATCACCAAAGTGACTGAAAGATGAAAATAGAAGCCACAACAGGAAATAAACAACTGCA
A_55_P2349258	0.791183	1.73049	up	Ptk2	Mus musculus PTK2 protein tyrosine kinase 2 (Ptk2), transcript variant 2, mRNA [NM_001130409]	TGTGGCTTTGTAGAAAGTGTATTTTTCTCAGCTCACAGTTGTGATCATGCTGGAGCCTTC
A_51_P245202	-0.790937	1.7302	down		RIKEN cDNA 4930544L04 gene [Source:MGI Symbol;Acc:MGI:1926057] [ENSMUST00000097982]	AAGAAATGGATGGAATAATTAGCCCTTTAATGGATACTATTCTATTCCTTCCCAGAACTC
A_55_P1999800	0.790076	1.72917	up		Q5QD03_CHLRE (Q5QD03) Set3p, partial (3%) [TC1639085]	CCATTTCTCATCCGCAACCCAGGACCGTTGCACAAATCTCCTTAGGTGAATGAAATCAAA
A_66_P122053	0.789992	1.72907	up	Kcnq5	Mus musculus potassium voltage-gated channel, subfamily Q, member 5 (Kcnq5), transcript variant 1, mRNA [NM_001160139]	AGGAAGTTACCTAAAACATGTTTGCCACGTCTAATCTAAATGTTTGCATCATTACAATGT
A_51_P211793	-0.789938	1.729	down	Rlbp1	Mus musculus retinaldehyde binding protein 1 (Rlbp1), transcript variant 1, mRNA [NM_020599]	CGTGGAAGGCAGAGTTAAAGGCATACTTGCAATTCAGTAAAAAGAAGAAAGAGAGGGGCT
A_30_P01023836	-0.789056	1.72794	down		lincRNA:chr9:118060025-118085050 forward strand	GGCTTCTACATCCTATCAGGACAGGACAAGAACTTTGTCTAACCTAATTTGGCTCACTGG
A_51_P185763	-0.788986	1.72786	down	Slc46a2	Mus musculus solute carrier family 46, member 2 (Slc46a2), mRNA [NM_021053]	CGTGCTAGTTCTATGGAAGACTGTGACTAAAGCCTAAATTTAACCAACCCAAGGGGAATG
A_55_P1994112	-0.788616	1.72742	down	Sema5b	Mus musculus sema domain, seven thrombospondin repeats (type 1 and type 1-like), transmembrane domain (TM) and short cytoplasmic domain, (semaphorin) 5B (Sema5b), mRNA [NM_013661]	CAGCAACAAAAAGGATGTTAAGCTGTGGCATTATTAATTAAAGATGATATCCAGTCTCCA
A_30_P01029269	0.788266	1.727	up		lincRNA:chr5:111565658-111566257 forward strand	TGTAACCCTCTCTGAGAAATTGTGCTCTAGTCTCAAAAAGGTGGAGTGACTGTAGGGTCT
A_30_P01023557	0.787956	1.72663	up		lincRNA:chr18:36481237-36481819 forward strand	TGCTTCCAGGTAAACCAGAAGACTGCTGTGTGAAGGATTTGTACAGAGATGCAAGAAGCA
A_30_P01027231	0.787786	1.72642	up		lincRNA:chr4:145845450-145863550 reverse strand	GCAACAGATCATAAATTCCTGCTCCAGTGACAGATGTTGTACTTTAAATTCAAAAGTAAG
A_55_P2039704	0.787752	1.72638	up	S100a2	Mus musculus S100 calcium binding protein A2 (S100a2), mRNA [NM_001195760]	TTCCGGATGTATGCCCTGGTTCTGGTGGATTCTGCTATCTGGTTTAATAACTTCCTTGAG
A_55_P2109257	0.787724	1.72635	up	Nipal3	Mus musculus NIPA-like domain containing 3 (Nipal3), mRNA [NM_028995]	CATGTGTTATTTTGCAGAAGTGTGTATACTGTGTGCAGATAACATTGTAAAGCGGTATTT
A_55_P2054373	-0.787143	1.72565	down	Defa-ps1	Mus musculus defensin, alpha, pseudogene 1 (Defa-ps1), non-coding RNA [NR_003146]	AACACAGATGAAGAGACTAATACTGAGGAGCAGCCAGGGAAAGAAGACCAAGCTGTTTCT
A_55_P1989813	-0.787052	1.72554	down	Gcm1	Mus musculus glial cells missing homolog 1 (Drosophila) (Gcm1), mRNA [NM_008103]	GAGGAAGAGGAAGAGGAAGAGGAAGAGGAAGAGGAAGAGGAAGAGGAAGAAGAAGGGGAA
A_52_P306357	-0.786996	1.72548	down	Prok1	Mus musculus prokineticin 1, mRNA (cDNA clone MGC:51604 IMAGE:4975079), complete cds. [BC042707]	CTGAGTAAGGTCCAGGGAAACTCGAGTTAGCTACTATCTATCCAGTTGTTACCTGGTGAT
A_30_P01021639	-0.786957	1.72543	down		lincRNA:chr5:33773842-33942967 reverse strand	AACAGCTACCAAGCTGAGAGAGTCTTAGCCTGGTGCAGCAGTAAGTACTCTAGGGTAGGT
A_55_P2037787	0.786266	1.7246	up			GGGAGGATTATTATTCGAGAGAGGATTGTTATTATTGGGAGATATAAACAGGGGAGATAT
A_30_P01022182	0.786134	1.72445	up		lincRNA:chr6:67054389-67054857 forward strand	ATTTAGGGTACACCACATGGAGGAGAGAGGAGTGCTTCTGTTTCTCCTTTTCTACCTTCT
A_51_P189241	-0.785676	1.7239	down	Jazf1	Mus musculus JAZF zinc finger 1 (Jazf1), transcript variant 1, mRNA [NM_173406]	ATTATCTTGCCCTTTAAGAAGCTGAAATTCTTGCCATCGAACTTACCAATCATTTTAGTG
A_30_P01020783	0.785583	1.72379	up		lincRNA:chrX:100655711-100678572 reverse strand	GGAAAAAATAACTGAAAGCCTTCCTTTCACAGTTACTGCCATCAATATTGCTACCAATTA
A_55_P2141464	-0.784954	1.72304	down	Mageb17-ps	PREDICTED: Mus musculus melanoma antigen family B, 17, pseudogene (Mageb17-ps), mRNA [XM_141933]	ATGAAGGTCCTGGAAGTTATAGCTAAGATAAATAATACTTCCCCTAGTTTCTTCACTAGT
A_51_P275365	0.784948	1.72303	up	Olfr1411	Mus musculus olfactory receptor 1411 (Olfr1411), mRNA [NM_146490]	CTGGAGCAGTGGCATCCATGGCACAGGGCAAGGTGATATCTGTCTTCTACACCCTGGTCA
A_55_P2201020	-0.784938	1.72302	down	AI790442	DLP01_05_H18.x1 FH DLP01 Mus musculus cDNA clone DLP01_05_H18 similar to Expressed sequence AI790442, mRNA sequence [DV053137]	AAAGAAAAAGAAAAGGAGAAAGAAAGAAAGAAACAAAAACCTAGCTACCCTAGCAAAAAA
A_55_P2422438	-0.783942	1.72183	down			AATTGAAGCGAGAAGCAGAGGAATGGCATATAACCTCAGAGACACTAATACCAAGGGGGA
A_55_P1967712	-0.783895	1.72177	down	Adamts13	Mus musculus a disintegrin-like and metallopeptidase (reprolysin type) with thrombospondin type 1 motif, 13 (Adamts13), mRNA [NM_001001322]	TGTTCGTTGTGTGCAGCTAGACCGTGGCCACCCGATATCTGTACCTCACTCCAAGTGCTC
A_30_P01025555	-0.783228	1.72098	down		lincRNA:chr1:138473514-138476054 reverse strand	TTAAGCGATGCTCGCTTAAAACCCAAGAACGGCAGCAGAAATAAATTAACTGGAGAATCT
A_30_P01029290	0.78307	1.72079	up		lincRNA:chr10:72726649-72799726 forward strand	TTGAATGTCAGCATCTCTGTGTTGAGGCTTCTGTGGTGTCCTTCGATCCTTCATAGGAAT
A_55_P2136533	-0.782983	1.72068	down	Kmt2d	Mus musculus lysine (K)-specific methyltransferase 2D (Kmt2d), mRNA [NM_001033276]	TGAGTGGGTGGAAGGGGGGTAGGAGAAGGACAACAACAACAATAACAACAACAAAAATCC
A_30_P01018559	-0.782969	1.72067	down		lincRNA:chr9:88333945-88342370 forward strand	CACACAGAGACTCAGTTATGTGGAAAGACACGTACATACTATTTGCAGAATTAAAAACTA
A_30_P01026342	0.782555	1.72017	up		lincRNA:chr1:107866276-107887102 reverse strand	ATTGTGTATAAATCTCATCTCTTCCAAGCTATCTACTTTTACTCCCATTGTGCCTCTGTG
A_55_P2161247	0.781695	1.71915	up	A830019P07Rik	PREDICTED: Mus musculus RIKEN cDNA A830019P07 gene (A830019P07Rik), misc_RNA [XR_168584]	GGTGCATCCATAAAACATAATGTCCGTTGCTGACACATCAATTTCATTAACATCTTTTAC
A_52_P232663	0.781646	1.71909	up	Rhot1	Mus musculus ras homolog gene family, member T1 (Rhot1), transcript variant 1, mRNA [NM_021536]	TGATCTTGAGGTTTTTTGTCTTCTGAGGTAAATATCTCTGTCCAGATGTGAGTGTGCTCC
A_30_P01018914	-0.781279	1.71865	down		lincRNA:chr9:78107225-78118850 forward strand	TTCAAGAAGCAAGGAAGGCTTTCAAGATTCAGTGAAGCTGCATTGATGGAGCCACAGATA
A_30_P01031381	-0.780738	1.71801	down		lincRNA:chr2:153325670-153352170 forward strand	GACACTGACACACACTGTGTGACACAGACAGTCACACAGTCACTAGTGGGGTTGTAAAGT
A_30_P01017521	0.780595	1.71784	up		lincRNA:chr2:173115795-173116608 reverse strand	CACCCCCCAGAATGAACCAAGAAAGCACTGCTGTTGGCTATCCGTTGATGTTGGTGGCTT
A_30_P01025367	-0.780391	1.7176	down		lincRNA:chr18:31774894-31784994 forward strand	CCTTTTGGACATACACATACAGGGTGAAAATGATTGACAGGAATCACTTGAAATGCTTTC
A_51_P295315	0.778924	1.71585	up	Ankrd2	Mus musculus ankyrin repeat domain 2 (stretch responsive muscle) (Ankrd2), mRNA [NM_020033]	CTCAACCGCTACAAAATCATCAAACTGCTGCTCTTGCATGGGGCGGACATGATGGCTAAG
A_30_P01031007	0.778649	1.71552	up		lincRNA:chr3:85806420-85889300 reverse strand	TCTCTTTACTGTTAGCATCCCTAGCTACTGGTCTGAGGTTGCTTTTTGATCTTGGCCTTG
A_30_P01019580	-0.77857	1.71543	down		lincRNA:chr7:88131123-88136898 forward strand	AGTGGACATTTAAGACCAGCTTGAACTGTATCTAGACTGTTCTTCAAAAACAAAAACCAA
A_55_P2048660	-0.777853	1.71458	down			TCAGAGAATTCATACAGGAGAGAAACCTTATAAATGTAGTGAATACCCGCCCCCTTCCGG
A_30_P01026731	0.777269	1.71388	up		lincRNA:chr14:22267795-22319045 reverse strand	TTTCTCTGTGTGTTGCCTACACCCAGGGACATCGTGCACAACCACAGCACAGCCTCTCAG
A_55_P2116880	-0.777267	1.71388	down	Vax1	Mus musculus ventral anterior homeobox containing gene 1 (Vax1), mRNA [NM_009501]	TTCGAGCCTTACTCCCGGACCAACAATAAAGAAGGGGCCGAGAAAAAAGCGCTGGACTGA
A_30_P01023908	-0.777103	1.71369	down		lincRNA:chr5:79845827-79846360 reverse strand	TCAATACTTAACCTCCTGAGAGAATAAGGAATAGCCACAAATCCAATAATCCCCATCTGC
A_30_P01023029	-0.776611	1.7131	down		lincRNA:chr17:39983902-39985688 forward strand	GTGGGGGGATGTGAGTGTCGCGTGTGGGTTCGCCCGTCCCGATGCCACGCTTTTCTGGCC
A_52_P549827	0.776471	1.71294	up	Mgst1	Mus musculus microsomal glutathione S-transferase 1 (Mgst1), mRNA [NM_019946]	AGAATTCCTATATTTTCAGTGGATTCAAACTCTTTCTGAGGTTTTAATGCGTGAAAGGAG
A_30_P01023718	-0.775981	1.71235	down		lincRNA:chrX:146827709-146913398 forward strand	ACATAGGGCAGAAGAGAAGGGTCTGTATGGCACAATACTGCCATCTAAGACTTTAAAAAA
A_55_P2005826	-0.775941	1.71231	down	Loxhd1	Mus musculus lipoxygenase homology domains 1 (Loxhd1), mRNA [NM_172834]	CTCAGGGGAAACAAGTGGAGAAGGAGAGGTTATCAAGATGGTATATTTTAAGCAAAAACT
A_55_P2264483	-0.775482	1.71176	down	A730054J21Rik	Mus musculus 9 days embryo whole body cDNA, RIKEN full-length enriched library, clone:D030072J05 product:unclassifiable, full insert sequence. [AK083726]	CGAAGCCATTTGTAAAAACACATAAATTGTATTGTTTAGCCATCTTCCTGATGTGTCAGA
A_55_P2296088	0.775433	1.7117	up	Sp3	Mus musculus trans-acting transcription factor 3 (Sp3), transcript variant 1, mRNA [NM_001018042]	GAGAAATGTATGTTTTTTATTATGCTGTATTTTCTTTTTATTTTTTAATTATTGTTTATA
A_52_P246165	0.77542	1.71169	up	Ptprk	Mus musculus protein tyrosine phosphatase, receptor type, K (Ptprk), mRNA [NM_008983]	AAAGGACTTGATCAGTTTCTGTGACTGTATGAGAGCATCCACATTTCATGCCACCTAATT
A_55_P2147296	-0.774895	1.71107	down	D930048N14Rik	Mus musculus RIKEN cDNA D930048N14 gene (D930048N14Rik), long non-coding RNA [NR_027958]	ATTTGACAGAACTATGGATTTGACATGCAAGCCATGTGGTTCCAATGCCAAGGAGTGAGG
A_55_P2063608	-0.774091	1.71011	down		Mouse T cell receptor Valpha11.3(a) chain mRNA, partial cds. [M73265]	TCCCAGGGGCAGCCTCATCAATCTTTTTTACCTGGTTCCAGGAACAAAGGAGAATGGGAG
A_30_P01020788	-0.774031	1.71004	down		lincRNA:chr10:94134000-94149200 forward strand	GAACTTGCATTGACTATGGAGGAGAATGATAAGTAGTACTTGTAGCCCTGAAACTGACTG
A_51_P307944	0.773797	1.70976	up	S1pr4	Mus musculus sphingosine-1-phosphate receptor 4 (S1pr4), mRNA [NM_010102]	CTGACATCTTTGGTTCTAATGTCTGGGCCCAGGAGTACCTGCGTGGCATGGACTGGATCC
A_30_P01033286	-0.773417	1.70931	down		lincRNA:chr6:128116450-128147150 forward strand	CTAGCAACTGATGAAGAAAATGAAAACATTTGAGGAAAACAGGAAGAATACCCTCTAATC
A_55_P2317929	-0.773055	1.70888	down		predicted gene 11149 [Source:MGI Symbol;Acc:MGI:3642683] [ENSMUST00000068730]	TTTAAACTTGGCGATGACTGGATTCACAGTAAACACTCAAATGGATAATGCCGATTGACA
A_30_P01030376	-0.772994	1.70881	down		lincRNA:chr2:104590593-104606218 forward strand	GGAATATAACTGTATTTTCTCTGGATCAACAGCAAACTCCTAAAACAGAAAGATGGTCAC
A_66_P121193	-0.772287	1.70798	down	Gm7480	PREDICTED: Mus musculus predicted gene 7480 (Gm7480), misc_RNA [XR_168523]	ATGACCACCAGTGAATATGACAACACTAAAGAATAGTTTAAGGTACCACCAAAGATTGTC
A_30_P01018212	-0.77224	1.70792	down		lincRNA:chr3:37543528-37546874 forward strand	GTAGAAAAATCTGAAAACACCACTTATTGATAATCTGAGAACTATTTGGGTGGGGGGAAA
A_55_P2073104	0.771931	1.70755	up	Gm438	Mus musculus predicted gene 438 (Gm438), mRNA [NM_001126316]	TTCCCCTGCTCCATGAAAGTTACAAATGCTGTTGCCCGTTACATAAAAGACATGTGCTAG
A_30_P01025424	-0.771929	1.70755	down		lincRNA:chr14:28231577-28242027 reverse strand	TAATAAAGGAGGACAAAAGAAACTTGTATGGTGCTCCATATTTAGGAACAGATAACTGGT
A_52_P286928	-0.771449	1.70698	down			CTTGGGAATGACATTGCATGAACGCTTTACTAGATACCTAAAGAGAGGAAATGAACAGGA
A_30_P01032727	-0.771105	1.70658	down		lincRNA:chr16:9249688-9275013 reverse strand	CATCTAACCGTTTAGGGTTAGAAGAAGAAAGGTACTGGAGAGAAGACAGAAGACATTAAT
A_55_P2130600	0.771092	1.70656	up	Musk	Mus musculus muscle, skeletal, receptor tyrosine kinase (Musk), transcript variant 1, mRNA [NM_001037127]	GTTTAGTTCTTCCTTGCACAGAATATGTAACGTTGTATTTGCATTCTGGAATTGAGTATC
A_55_P2019743	-0.770831	1.70625	down			CAGTCACTAGCTCTGTATGTAGTTCATCTCAGAAAGAGGAGAGTGCTGCTTCAGGAAGAA
A_30_P01033430	-0.770647	1.70603	down		lincRNA:chr7:67001975-67050575 forward strand	TGAAGGCTCTTATCCAAGCATCCAGTCAGAAAAAGCCAATAACAAGGGCAATCATAGGGC
A_52_P384690	-0.770339	1.70567	down	Tex11	Mus musculus testis expressed gene 11 (Tex11), transcript variant 1, mRNA [NM_031384]	CCACAAGCTTTTCATATGCCAGAATCTGAATATAAAAAGAAAGAAATGGGTAGACTTTGG
A_55_P2160780	-0.769952	1.70521	down			TCACACTGTGCATTGTGAAACTTGACAAGGTGTTAGGAACAGGAGAGACTTCCATCAGCA
A_55_P1980169	-0.76981	1.70505	down	Vmn1r17	Mus musculus vomeronasal 1 receptor 17 (Vmn1r17), mRNA [NM_134171]	GATAACAGAATAATAGTTATGCTGAAAAACATGCACTCAAAGCACCACCAGAGGTTTTTT
A_65_P17602	0.769759	1.70498	up	Pgm5	Mus musculus phosphoglucomutase 5 (Pgm5), mRNA [NM_175013]	AAACCCATCCTGGTATTAGAGATATGGCCTTACAGGTATTAATCACATTCTGAATTTGGC
A_30_P01020957	0.76935	1.7045	up		lincRNA:chr9:55786058-55797810 forward strand	AAGGCTTGTTTCAAATGTCGGTGCCAGGCTTGGAAGGATCCAACTACAAAAACCTAAAAG
A_30_P01031259	-0.768883	1.70395	down		lincRNA:chr12:53669892-53710742 reverse strand	GGCCAAAAACAAACACAAGTCAGTGTAACAGACTGAGCTTTAAACCATACTTTAATTTTC
A_30_P01031355	-0.768818	1.70387	down		lincRNA:chr10:122410471-122422759 forward strand	AGACAAACTAAAACCCGGCACGAGTTAAAACCCTTCCAGGCGGAAAGTTGTGCCGCGGCC
A_30_P01019847	-0.768607	1.70362	down		lincRNA:chr13:108548345-108679004 forward strand	AAGACAGTGCCACAACATGGGCACAATAAAATATGTCCTTGTTTCCACAGCTGCAGGTCA
A_55_P1967105	-0.768055	1.70297	down	Bai2	Mus musculus brain-specific angiogenesis inhibitor 2 (Bai2), transcript variant 1, mRNA [NM_173071]	CTGTCCTGGGCTGGGGAGGGGGGAGGGAAACTTTGTTGGGAATAAACTTCACTCTGTGGA
A_55_P2471029	0.766664	1.70133	up	5031434C07Rik	Mus musculus 11 days pregnant adult female ovary and uterus cDNA, RIKEN full-length enriched library, clone:5031434C07 product:similar to H88 [Human herpesvirus 6], full insert sequence. [AK030322]	GATGTTAAGAAGGCTCTGGACCATAGTATTTCTTCTTATCGTGAGTTGGCATTACATCCT
A_55_P2096942	0.766634	1.7013	up	Nrn1l	Mus musculus neuritin 1-like (Nrn1l), mRNA [NM_175024]	CAGTGGCTGCCATGTGAGCTCTGCAGTATGCACACTTTTCATTAAAGGTATTTATATTTG
A_55_P1993825	0.766171	1.70075	up	Itpkb	Mus musculus inositol 1,4,5-trisphosphate 3-kinase B (Itpkb), mRNA [NM_001081175]	TCCACTGGCTTCTCCTCTTCTTACGATGACTCGGAGGAGGACATCTCCAGTGACCCTGAG
A_55_P2046003	-0.765171	1.69957	down	Gm8165	PREDICTED: Mus musculus predicted gene 8165 (Gm8165), mRNA [XM_984613]	AGGGATGAACTTCAGGGAATCCTGGCCAACTACACTAACAAGGATTTAAATGACAGGTAG
A_30_P01021991	-0.765157	1.69955	down		lincRNA:chr14:115423660-115463160 forward strand	AGAACGAGCCGCCGTGGGCGGGGCCTGCGGTGATTGGCGGGCGGGCGGGGAGGTCGGAAG
A_66_P140658	-0.765106	1.6995	down	Olfr787	Mus musculus olfactory receptor 787 (Olfr787), mRNA [NM_001011822]	GTATGAAAAACCATTCTGTGATTACTGAGTTTGTGCTCCTGGGCATATCAGACGATCCAG
A_55_P2404658	0.765071	1.69945	up	Gm17501	PREDICTED: Mus musculus predicted gene, 17501 (Gm17501), misc_RNA [XR_106421]	TCCTTGTTTTTCACGCAATCTGTCTATCATGATTTAAAATAAAGTTGCAGTGGATGATCC
A_30_P01024439	0.765001	1.69937	up		lincRNA:chr1:107866276-107887102 reverse strand	TATGTCTCCTATGCCAGTCTACGGAGCACTTCTTTTTCTGAGCTACAGCAACATTTGCCA
A_30_P01023901	-0.764928	1.69928	down		lincRNA:chr10:60473030-60535340 forward strand	CTCCTGATTTAATTAAAGTCTCTCGGATACTCCCTGAGACAAAATCCACGGAGGCCATCA
A_55_P2126832	-0.76489	1.69924	down			AAATTATGAAAAAATTATTTAGAAGTCTTAATATTATTAAGTTAATCAATAATTTCTCTG
A_30_P01027180	-0.764882	1.69923	down		lincRNA:chr17:39983902-39985688 forward strand	TTTCCCGTCCGGCTCTTCCGTGTCTACGAGGGGCGGTACGTCGTTACGGGTTTTTGACCC
A_30_P01019105	0.764802	1.69914	up		lincRNA:chr8:48480224-48480698 reverse strand	CTCTTCTAAGAACGTGGCACTACTTATTGTCTTCACTTCCAGAGATGTTTTGCACAGAGG
A_55_P2091032	-0.764791	1.69912	down		CJ238989 RIKEN full-length enriched mouse cDNA library, C57BL [CJ238989]	AATGCTGATGCAGTTGCCCTGTACTGAAATAAACGCAGCAGAATAAATATAAATGATGAG
A_30_P01022652	-0.764403	1.69867	down		lincRNA:chr13:34693404-34717987 forward strand	AGAAGTCTCGGGAGGATTATAATCAATCTGAGATCAGCACATTTTGGCCCCAGGCACTAT
A_55_P2004613	-0.764167	1.69839	down			CAACTTGGAGCTTCGGCAGGCGCTCAGTCAGATGCACAAGAGTTTTCCAAGCTCTTTATG
A_30_P01032857	-0.763854	1.69802	down		lincRNA:chr10:84005221-84022896 reverse strand	ATGTCAACTACGTACCCAGTGATAAGCATCAAGATAGCTTAGCAAACAGCGTGCACCAGA
A_55_P2159725	-0.763851	1.69802	down	Olfr13	Mus musculus olfactory receptor 13 (Olfr13), mRNA [NM_146652]	AACCCCTTGATCTATAGTCTCAGGAATTCTGACGTGAAGAATACATTGAAAAGAGTGCTG
A_55_P2175880	0.762969	1.69698	up	Mgst1	Mus musculus microsomal glutathione S-transferase 1 (Mgst1), mRNA [NM_019946]	GGAGTTACTTTGTCAATGGCTTACAGGCTGCTAAGGAGCAGACTGTACTTGTAAAGAGAA
A_55_P2076782	-0.762446	1.69636	down	1700028P14Rik	Mus musculus RIKEN cDNA 1700028P14 gene (1700028P14Rik), mRNA [NM_026188]	CCCATTTTAAAAAAGCAATGTATACAACCAGACCCTCATGCTAATGAAAAACGACAAATG
A_55_P2021291	-0.762074	1.69593	down	Elk4	Mus musculus ELK4, member of ETS oncogene family (Elk4), mRNA [NM_007923]	AAATAACTCATCAAGATCTAAGAAGCCCAAAGGGTTAGAACTGACACCCGCCCTTGTGGT
A_55_P2039196	-0.761617	1.69539	down	Gfra4	Mus musculus glial cell line derived neurotrophic factor family receptor alpha 4 (Gfra4), transcript variant 4, mRNA [NM_001271002]	GGTTGGTGCCGCCCTCTTGCCTGGAGCCCCTGGAGCGCTGCGAGCGCAGCCGCCTGTGCC
A_55_P2120886	-0.761527	1.69528	down			CTGAAAGTAAAGACAACTTTACTAACCAGTGAGAGATTGATACTCAGATCTCAAAGGATC
A_52_P650379	-0.761445	1.69519	down	Strap	Mus musculus serine/threonine kinase receptor associated protein (Strap), mRNA [NM_011499]	CTGGATGGATACAATTGCTTCTCTTGTCTCTTTAAACATGCATGTTAGTTACTAAAACAG
A_55_P1991019	0.761263	1.69497	up	Dclk2	Mus musculus 0 day neonate cerebellum cDNA, RIKEN full-length enriched library, clone:C230072O15 product:hypothetical Eukaryotic protein kinase/Doublecortin containing protein, full insert sequence. [AK082633]	GCTCATGGAAGCTGGTGTCTTCCATGTTCCTGTCTCCATGGAGGATTGCCTGGCATGTAG
A_66_P123148	-0.76097	1.69463	down	Olfr169	Mus musculus olfactory receptor 169 (Olfr169), mRNA [NM_001011855]	CGTAATAAAGATGTCCTTATGGCTGTGAAAAACATCGTCCAAAGTAATTTTTTGAATAAA
A_30_P01024452	-0.760737	1.69436	down		lincRNA:chrX:165792277-165807952 reverse strand	GTTAGGCTGCCAGCTTGCAGAATGATAATTTCTTCTTGATCTTCTCTGATCACGAAAAAA
A_51_P476018	0.760341	1.69389	up	Sox7	Mus musculus SRY-box containing gene 7 (Sox7), mRNA [NM_011446]	AGTCCCGGATGGATATTAATAATCTCGTGAAACACTATCACAGGCATTAAGCTACTCTGT
A_55_P2134556	-0.760046	1.69355	down	Ms4a13	Mus musculus membrane-spanning 4-domains, subfamily A, member 13 (Ms4a13), mRNA [NM_198224]	TAAGTTCAATTGTGAAGTCATTGGTGAGGAAAACTTGGAGGCTCAGCAGCCTTGCTGCTT
A_30_P01029879	-0.75965	1.69308	down		lincRNA:chr13:19611679-19620954 reverse strand	GACTGGCTGTGTGATACAGCTAACAGAAAGAATAAATCAGAGTGGATTTCAGCCATTCAC
A_30_P01033228	-0.759641	1.69307	down		lincRNA:chr9:88575075-88611650 reverse strand	TTAGTCATTTAATCACTGAAGTGGGGTCAGCTGGAGACCACCCAAGTCAGGTTTTTACCT
A_55_P2086750	-0.759615	1.69304	down	1700062C10Rik	Mus musculus adult male testis cDNA, RIKEN full-length enriched library, clone:1700062C10 product:unclassifiable, full insert sequence. [AK006860]	GCAAGCAATGACAAGTATTGACAAGGATGCAGAAATAAGAAGCTCAAGTGTTCTGAATAA
A_55_P2126557	0.759414	1.6928	up			GCTTATGGCAGTTACTAACTCTCTACATTTTTCTTAATCAAAAGTTGTCTAGGTAACCTG
A_30_P01026463	-0.759263	1.69263	down		lincRNA:chrX:100745320-100819322 forward strand	TAAGCAGAAAACCTCAGTATAAGTAAGGGACAGATTCCACAAATGACAAAATTCCAACTT
A_55_P2169099	-0.758433	1.69165	down	Hoxc12	Mus musculus homeobox C12 (Hoxc12), mRNA [NM_010463]	AACCGGAGAATGAAAAAGAAAAGACTTCTGCTGAGGGAGCAAGCTCTCTCCTTCTTCTAG
A_55_P2142990	-0.758182	1.69136	down	Pifo	Mus musculus primary cilia formation (Pifo), transcript variant 2, mRNA [NM_029604]	ATGAACACGGAGGAAATACCGGTTGCTCCTCCGCTCCGTGGAGTTACACCTGCTTTACAA
A_55_P2027337	-0.757908	1.69104	down			ACTATGGCTATGGCATGTTCTTATCCACCCCGCCCCCAACACAAATAAATGAAATTTTTT
A_55_P2140201	0.75699	1.68996	up	Dupd1	Mus musculus dual specificity phosphatase and pro isomerase domain containing 1 (Dupd1), mRNA [NM_001013826]	ATGTGTGGGTACTGTGTTGTGATTAAATGCTTGGCTCTGAAAGGGAAAAATCATGTTATT
A_30_P01023882	-0.756833	1.68978	down		lincRNA:chr15:32708654-32725622 forward strand	GGTTTGATACCACTGGGTAAAATGATTGTGAGAAAAGAAATTTCATATATGGGGAACAAC
A_30_P01022358	-0.756078	1.68889	down		lincRNA:chr1:138442536-138520766 forward strand	CTCGTCCCATTATCTTCTCCAAAGATGGGGGAAAGATTATTCGGATTATATTCAAAATAT
A_55_P2193661	0.755776	1.68854	up	C130057D09Rik	Mus musculus 16 days embryo head cDNA, RIKEN full-length enriched library, clone:C130057D09 product:unclassifiable, full insert sequence. [AK081630]	CACATGAGCATAACTAAAGCCAGTGTAGTTCCTATTGTATGATAGATGTTCAATAAATGC
A_30_P01022667	-0.755623	1.68836	down		lincRNA:chr14:8576576-8624104 reverse strand	CTATGCATTGCAAGTATCTACATCAAGATATAAACATCCAGTTGACTGAGCAAGAATTGT
A_30_P01023523	-0.755608	1.68834	down		lincRNA:chr6:116092274-116144199 forward strand	CCGCCGCCGCGCCCGGTCCATCCCCACCCCGACCACCCCCCCCTCCCGGCCCGCCCCCCG
A_30_P01031534	-0.75557	1.6883	down		lincRNA:chr16:30170306-30223193 forward strand	AGAAAACTACTTACCACAACAATCTAGAAGCTCACGACCTGTCCCAGAAGCTAAAGACCA
A_55_P2111172	0.755389	1.68809	up	Mecom	Mus musculus MDS1 and EVI1 complex locus (Mecom), transcript variant 2, mRNA [NM_021442]	GTTTTGTCCCTGGACACATCCTTGGGAAGGCTGTGGCTTAGTAAAATGACTTTTAGACAC
A_30_P01019559	0.755037	1.68768	up		lincRNA:chr17:22916801-22954670 reverse strand	CAAAACACAGTATTGTTTCAACATCTATTTATCTTGCCTTCTGCATGGCACACAGTTAAG
A_55_P2119737	-0.75465	1.68722	down	AA414992	PREDICTED: Mus musculus expressed sequence AA414992 (AA414992), mRNA [XM_001478791]	GGCGCCTACTCTATCTTGGGTGATCTTCATTTACTTAATAAATGCAAGAAAATTGTTGAA
A_55_P2185085	0.75457	1.68713	up			TGCTACATGGACTCCTTAAAAATCACTCCCCGCTCAAAGGTGTTTATAGGATCTACCCAC
A_55_P2123496	0.754272	1.68678	up	Jam2	Mus musculus 9.5 days embryo parthenogenote cDNA, RIKEN full-length enriched library, clone:B130032E13 product:junction cell adhesion molecule 2, full insert sequence. [AK045095]	CTAAAGTCTGAAGTCTTAAATTGTTCAAGGCAATCGCTTAACTGTCAACCCTTATGTAAT
A_52_P236233	0.754181	1.68667	up	Gast	Mus musculus gastrin (Gast), mRNA [NM_010257]	CTGTGTGTGTACATGCTGGTCTTAGTGCTGGCTCTAGCTACCTTCTCGGAAGCTTCTTGG
A_52_P508277	-0.754038	1.68651	down	Pramel	PREDICTED: Mus musculus preferentially expressed antigen in melanoma-like (Pramel), mRNA [XM_885719]	TTTCCTCACCCAACTTGAGCGAATGGACAACCTTCAAGAGCTAAACTTGTCTTTCTTCTG
A_52_P460791	-0.753779	1.6862	down	Ppy	Mus musculus pancreatic polypeptide (Ppy), mRNA [NM_008918]	AAACTCAGCTCCGCAGATACATCAACACACTGACCAGGCCTAGGTATGGGAAGAGAGCCG
A_55_P2176989	-0.753113	1.68543	down	Stx8	Mus musculus syntaxin 8 (Stx8), mRNA [NM_018768]	TGATTATTAATTATATGCATCTTAAATCTGGATACCATATAAAGAAATCCAGATACCTGG
A_30_P01021108	-0.753039	1.68534	down		lincRNA:chr8:80055575-80071825 reverse strand	ACCACCTAATCTAACAATCCACACCCTTGATCTTTAAAACAGCCAATTAATAGATTTGCA
A_30_P01027196	-0.752614	1.68484	down		lincRNA:chr1:173353316-173367449 forward strand	GCACACATGTGCACTGACACAGCACACATGTGCATAGACACGGCACACAAACCAGAAGGC
A_55_P2048388	-0.751588	1.68364	down	E330020D12Rik	Mus musculus Riken cDNA E330020D12 gene (E330020D12Rik), long non-coding RNA [NR_033736]	TACACACCAAGGTACAGGACTGGCTCCTGGGTGACAGAACCAGGTCTGCAACTAGGGGAA
A_51_P419017	0.751427	1.68346	up	Pde10a	Mus musculus phosphodiesterase 10A (Pde10a), mRNA [NM_011866]	GAGAAATCCAAACTGTTGATTACAGGTGCACTACAGGTATGCTCTTTCAGTCTATCTGGG
A_30_P01023965	-0.751415	1.68344	down		lincRNA:chr3:50320320-50411144 reverse strand	TTTGGAAACAGAAAGCACAGAGCATGCAGAGACAAGGAACACTACCTTAGAAGTGACTGC
A_30_P01020328	-0.751265	1.68327	down		lincRNA:chr18:84737058-84737644 forward strand	TCACCCATATATTCCCAAAGACCCACAGCATTTCAGGTACTTATATACTACTAAAATGAA
A_55_P2044541	-0.750978	1.68293	down	4930555G01Rik	Mus musculus RIKEN cDNA 4930555G01 gene (4930555G01Rik), mRNA [NM_175393]	GCAATGAGAGGAAGGAAATGTGTGAAATCCTGAATGTTTACATGTATGAGGATTTAAACT
A_52_P521882	0.750818	1.68275	up	Hddc3	Mus musculus HD domain containing 3 (Hddc3), mRNA [NM_026812]	GACACAGATACTACCCTGGATGAGGTAGAGCTGCACTTTGGAGCACAGGTTCGACGCTTG
A_66_P107256	-0.750707	1.68262	down	Kcna10	Mus musculus potassium voltage-gated channel, shaker-related subfamily, member 10 (Kcna10), mRNA [NM_001081140]	CCTCAACAGCATGGGCTCCAGAATGGGGAGTACTGAGTCTCTCAACAAGACCAATGGCAG
A_30_P01033069	-0.75008	1.68189	down		lincRNA:chr7:134649844-134651551 forward strand	CCCACATACACAGAGAGAGAGACAGAGCATTTTAAAAGGAAGCAGATAAATATCTTTTTT
A_55_P2214959	-0.750001	1.68179	down	D230017M19Rik	Mus musculus 12 days embryo eyeball cDNA, RIKEN full-length enriched library, clone:D230017M19 product:unclassifiable, full insert sequence. [AK084284]	GAAAGGAAATTATTAGGGTTATAATTTATTAAAAGGGTGAATCATTGATTTAGTCCCCCC
A_30_P01031719	-0.749389	1.68108	down		lincRNA:chr12:89092175-89105525 forward strand	ATTATTTACAGCTCTCAGGGCAAGACAGCAGCAGTGAAGTCCAAAAAGTAGGAGCAGAAG
A_55_P1987296	0.749169	1.68082	up		predicted gene 9969 [Source:MGI Symbol;Acc:MGI:3710519] [ENSMUST00000178177]	TTGTGTCGTCTGGTGCGAACAATGAGCCTGCATCAGGTGGCTGCGGCAGTGATGATGGTA
A_52_P219966	-0.749105	1.68075	down	Spg21	Mus musculus spastic paraplegia 21 homolog (human) (Spg21), mRNA [NM_138584]	TTCTGGTTGATGCCAGCGTTTATGCTCAAGAAAATCGTTTTGGGGAACTTTTCCTCTGGC
A_30_P01032862	-0.748924	1.68054	down		lincRNA:chr11:117835849-117842574 reverse strand	ATTATGTTTATGACCCCGCACCTTTGCCTGGAAACGGGATTCTGAATGCATCCAAGTTCT
A_55_P2125173	-0.74886	1.68046	down			GGCATTCAGAACTTCTTGCAGTCCAAACTAATTTAAGTTCCTAGATTTCTTGAGATCTAA
A_55_P2013128	-0.748715	1.6803	down		HSDJ447F3 match: proteins: C08G9.2 O44131 O62299 Q14508 Q28631 Q28894 Q62477 Q91450 Q98988 Q9IAR5 Q9N0L8 {Homo sapiens} (exp=0; wgp=1; cg=0), partial (37%) [TC1661613]	GCATGGATTTGGCAGTGTGAAATCTATGGACTAAATAAAGATGGCACGTTCTTTTTTAAA
A_51_P371745	-0.748349	1.67987	down	Havcr1	Mus musculus strain BALB/c TIM1 mRNA, complete cds. [AF399829]	AGCTACAGGAAGACCCACGACTATTTCAACAAGATCCACACATGTACCAACATCAATCAG
A_30_P01020988	0.748203	1.6797	up		lincRNA:chr18:73870981-73877247 forward strand	CACGTCTCTGCTCTTGACTTTTACTGTCCTGTGTGTTTACATTCTACTTAATTAGGAGTC
A_30_P01030620	-0.748191	1.67969	down		lincRNA:chr7:71093563-71095094 forward strand	TAGGGATAGAACCTTACAACCCCCAATGACTTAGGGATGGATTCAATAGGCAAACCCTAG
A_30_P01025062	-0.748114	1.6796	down		lincRNA:chr13:48576557-48581632 reverse strand	CCTTGGTTAGAATATCTCAGGGTAGTGGACATAGTTCACAAACTAATAATATTCAATCTG
A_30_P01025315	-0.748021	1.67949	down		lincRNA:chr15:36800254-36809571 reverse strand	CAAGAGGTATATCTAACAGGATATAAGCCTGTGGGGAGAAAGCAAAGACTCCAGTCTCTA
A_55_P2050203	0.747853	1.67929	up	Ptpdc1	Mus musculus protein tyrosine phosphatase domain containing 1 (Ptpdc1), mRNA [NM_207232]	GTTGGCATATTAAGTATGTTGTATCTGTGCCCTTACTCTTGTTGACATTTTAGAGGAAAA
A_55_P2243277	-0.74758	1.67897	down	4930524N10Rik	Mus musculus RIKEN cDNA 4930524N10 gene (4930524N10Rik), mRNA [NM_001256259]	TTAAAAAACACAGCACTCATGTGTTTCCAATGGGGCTTATCACAACCACTCTGTCACTCT
A_52_P351785	0.747565	1.67896	up	Tfam	Mus musculus transcription factor A, mitochondrial (Tfam), mRNA [NM_009360]	CCTCTGAATTTAAAGCTGGTGTTAGCATACGGATGTACAGTAGCTAGAAAGCCTTCCTGG
A_52_P5891	0.746967	1.67826	up	Fam101b	Mus musculus family with sequence similarity 101, member B (Fam101b), mRNA [NM_029658]	CAGGTGCAAAAATAATCACTTTCATTTTAAAGACTGGCGCTGTCTAGAGCCACATCACCT
A_52_P265811	-0.746546	1.67777	down	Ccdc9	Mus musculus coiled-coil domain containing 9 (Ccdc9), transcript variant 2, mRNA [NM_172297]	ACCACCTAAGCCTCCCACTTTTGGAGAGTTCCTTTCTCAGCACAAAGCTGAAGTCAGCAG
A_30_P01025207	-0.745803	1.67691	down		lincRNA:chr2:60038543-60046318 forward strand	TTAATGAAACGGTGTTGGCAAGAGGTCAACAGAGACCCTTGAAGTCAGAAAGGAACCACA
A_55_P2076303	-0.745669	1.67675	down	2014-03-08	Mus musculus membrane-associated ring finger (C3HC4) 8 (March8), mRNA [NM_027920]	ATTTGTTTGTGCTATATACGGGGTGTCTAAAGTTAGCAATAAAGCCTTTCTTTACAAAGG
A_55_P2182437	0.745303	1.67633	up		TBC1 domain family, member 1 [Source:MGI Symbol;Acc:MGI:1889508] [ENSMUST00000129389]	TTGTTTAGAAACTTCAGTGTCTCTCGAGTTGCAATGTGTATGTGAGCCATGGGTGATGGG
A_30_P01024778	-0.745257	1.67627	down		lincRNA:chr1:38886199-38892924 reverse strand	CATCGCCAGCAGCAGCCCGAGGCCGCGCTGCTCAGGTGCCAGCAGGCCCTGGACATGGGT
A_55_P1967840	-0.745105	1.6761	down	Kctd10	Mus musculus potassium channel tetramerisation domain containing 10 (Kctd10), transcript variant 1, mRNA [NM_001159941]	ATGAGGAGACCCTGAATATCTTGCTGTACGAGGCCCAGGATGGCCGAGGACCTGACAATG
A_55_P2140561	-0.743957	1.67476	down			GAAGCCTTTGGGGAGATTGAAAATATAGAACAGCCCATGGACACAAAAACAAAGGGAAGA
A_52_P186751	-0.743843	1.67463	down	BC061237	Mus musculus cDNA sequence BC061237 (BC061237), mRNA [NM_198677]	AACGATTTGAATGACAGGATCAACTTTGAGACATTCATGCTTGAGATGCAACATAACCAG
A_30_P01018773	-0.743637	1.67439	down		lincRNA:chr6:52046805-52072744 forward strand	TGATCCTATCATCAAAATAAACACTTACTATATTACCAAATATTACACAACTAAGATCCA
A_30_P01019992	-0.743586	1.67433	down		lincRNA:chr19:16059564-16085402 forward strand	AGTCATATTGTCAATACAATACCAAGAGACAACAGAAAGGGTGTGAGAACAGACTGTATG
A_30_P01027324	-0.743114	1.67378	down		lincRNA:chr14:78214602-78225827 forward strand	CAAACATTAGGTCATCTCACTCTGCCCTAGAGGCATGGAAACAAAAATATAAACACCTAC
A_51_P401024	-0.742863	1.67349	down	Lrrc34	Mus musculus leucine rich repeat containing 34 (Lrrc34), mRNA [NM_027941]	TGGCAAGTTTACAGTGGATTTTGAGAGAGATCAAAGTTCAGAAGTCAAAAAGTATTCCAC
A_51_P433388	0.742825	1.67345	up	1700019A02Rik	Mus musculus RIKEN cDNA 1700019A02 gene (1700019A02Rik), mRNA [NM_027070]	CTGGAACGTTTTGGACTCTCATGATTCACTTCTGCATCTTCTCTCCGGGTTTGCTATGTA
A_66_P110881	-0.74268	1.67328	down	Prr16	Mus musculus 7 days neonate cerebellum cDNA, RIKEN full-length enriched library, clone:A730014O07 product:MESENCHYMAL STEM CELL PROTEIN DSC54 homolog [Homo sapiens], full insert sequence. [AK042678]	CCAAACTGTACAAAGAAAACATCATGGTGGTCAAAAGAATGCAAATGATATCAAAGGGGT
A_30_P01018146	-0.742626	1.67322	down		lincRNA:chr6:145647711-145756861 forward strand	CTGGCTCGCTCTCGCGGCGGCCCTCATCCCGCCCCTGTGCGGGGCTCCGCGGCCCTATCG
A_55_P2087547	-0.74259	1.67318	down	Olfr1426	Mus musculus olfactory receptor 1426 (Olfr1426), mRNA [NM_146809]	CTTCACAGTGTGGCATAAAACAGCTCAAAAGATCTCAAATTGATAGTTTTAATTCTCCCA
A_55_P2240919	-0.742304	1.67285	down		RIKEN cDNA A730032A03 gene [Source:MGI Symbol;Acc:MGI:2444311] [ENSMUST00000135739]	AGCAGTGGAAACCCTAACTAAGGCACCAACTTTCAAAATATGCAGAAAATATTAAAAACC
A_55_P1996344	0.742236	1.67277	up			TGGCCTCAAATGTTTAGCAGTCCTTCCTGTTTGGGATTACAGTAAATGCTGGGACTACAG
A_55_P2181404	-0.741903	1.67238	down	Dnah9	Mus musculus 0 day neonate cerebellum cDNA, RIKEN full-length enriched library, clone:C230051G16 product:similar to CILIARY DYNEIN HEAVY CHAIN (AXONEMAL DYNEIN HEAVY CHAIN) (DYNEIN HEAVY CHAIN 9) [Homo sapiens], full insert sequence. [AK082443]	GGATCCACACATCTACCCTTTACCCTGTAAATATCTTAAATGTATTTACCCTTTCATATC
A_66_P130813	0.741204	1.67157	up	Samd4	Mus musculus sterile alpha motif domain containing 4 (Samd4), transcript variant 1, mRNA [NM_001037221]	TTTTTTGTAAAAGACTGATTATTGTTATGGATTCATTCTGTCTCATCTATTTTTATAATA
A_30_P01031878	-0.741089	1.67144	down		lincRNA:chr3:87575891-87576343 forward strand	ACAGAGAGGATGCTATGTGTGGAGACCAGACCTTCTCGCTCCTCTCACTCAGCTCAGCTC
A_30_P01028480	-0.740777	1.67108	down		lincRNA:chr1:141070245-141076841 reverse strand	GAACCAGCACTCTGTACCACAAACATTTCTGTTAAAGTAACAGTATTGTCAATACTAATC
A_52_P213807	-0.740614	1.67089	down	Olfr228	Mus musculus olfactory receptor 228 (Olfr228), mRNA [NM_146405]	GTCCAGTGACTCCTTAAAAACTGACAAGGTGGCTTCTATCTTTTATGCCCTAATAATCCC
A_30_P01031057	-0.740613	1.67089	down		lincRNA:chr4:99329231-99338424 forward strand	ATAAAACCAAAAGCTGCTTTCCTCAGAGGACTTTGTGTTTTTGCACACAGGTCCATCCCG
A_30_P01031717	-0.740152	1.67035	down		lincRNA:chr11:3538125-3554450 reverse strand	ATAGTTCACTGATAAAAGAAAACCTACATAGTTAACATTAAAAAGGTACATTTATTGTGA
A_55_P2071626	0.739988	1.67016	up	C530008M17Rik	Mus musculus RIKEN cDNA C530008M17 gene (C530008M17Rik), mRNA [NM_001163793]	CTTCTGGCAAGGTTATAGATGATTAACCTCTGTTCATAGACTTATATATGGAAGTAGAGT
A_30_P01017717	-0.739967	1.67014	down		lincRNA:chr16:64765397-64765884 forward strand	GAACATGAATAATATTAACCCCTGCCACTTGGAAGCAGGGATTAGTAGGCTAGTCACTAA
A_55_P2155848	0.739502	1.6696	up	Gm14207	Mus musculus predicted gene 14207 (Gm14207), long non-coding RNA [NR_030683]	TAGTCTTTCAGAGCAGCGGCCTGCAGAAAGGAAGAGATGTCATCCTTGAATGGATCTAAT
A_52_P293120	0.739203	1.66925	up	Prrg3	Mus musculus proline rich Gla (G-carboxyglutamic acid) 3 (transmembrane) (Prrg3), mRNA [NM_001081135]	GTGGGGATGTTAGATATTAAAGCCTTTCACTCCATGTCTGTATTTATCCTGTGATTAAAT
A_55_P2115181	-0.738806	1.66879	down	Pdhx	pyruvate dehydrogenase complex, component X [Source:MGI Symbol;Acc:MGI:1351627] [ENSMUST00000111183]	CTACCAGTCTGTGCCTTAGGTGAACTCTGTAAAAATGGAATAAAACAACTATCTTCATAA
A_52_P32353	-0.738505	1.66845	down	1700054M17Rik	Mus musculus RIKEN cDNA 1700054M17 gene (1700054M17Rik), long non-coding RNA [NR_045919]	ACAAGATCGAAAGAGAACCTAATGCTGACTGCTAAGGAAATGGGAAAATGCAAACCGAAC
A_51_P180176	-0.738435	1.66837	down	Gm16223	PREDICTED: Mus musculus predicted gene 16223 (Gm16223), mRNA [XM_003945391]	TGGCAGACATTCACTCTGTAAGACAAATGCTTCATGATTCATTTAGGGACCTAGAAATAT
A_55_P2032318	-0.738234	1.66813	down	4930522L14Rik	Mus musculus adult male testis cDNA, RIKEN full-length enriched library, clone:4930522L14 product:similar to KRUPPEL-RELATED ZINC FINGER PROTEIN F80-L [Mus musculus], full insert sequence. [AK019690]	CCAGAAGACATGGAAGGTAATCTTCATGTTCAAGTTGGTATGGATATGCTTATAAAGAAA
A_66_P130703	-0.737039	1.66675	down	Gm21505	PREDICTED: Mus musculus disks large homolog 1-like (LOC100862134), mRNA [XM_003945414]	TATACTCTCTATAAAATTTAAAATCATCATTAAAACCAACATATCCTTATGAATACAATT
A_51_P261544	-0.736857	1.66654	down	Gm9748	Mus musculus adult male testis cDNA, RIKEN full-length enriched library, clone:1700080P15 product:hypothetical protein, full insert sequence. [AK006960]	ACCGAAGGACTCTATTGAACAGGCGATGTAAATACACAGGAAGAAGGGAGAGTTACAAAC
A_55_P1991665	-0.736242	1.66583	down			CTCACTCCAATAAATACCTCTAATATCAACAATGATTTCATTAAAATCAAATCAATGTTC
A_55_P2022793	-0.73623	1.66582	down	Trpc1	Mus musculus transient receptor potential cation channel, subfamily C, member 1 (Trpc1), mRNA [NM_011643]	GGGATTTGCTTGGCTTTCGGACTTCTAAATATGCTATGTTTTATCCAAGAAATTAACCAT
A_30_P01027780	0.735926	1.66547	up		lincRNA:chr7:129293609-129294172 reverse strand	CATCTAAACACGCACACACACCCGTCCCAAGACACTTGTGAACCTGCACTCCTAGGGGAG
A_30_P01025664	-0.7359	1.66544	down		lincRNA:chr10:39607282-39619520 forward strand	TCGCTATCCAGAGACAAAGAGGGCTCTTGTCAAAAAGCACCAGAAAGAAACATGACACCA
A_52_P117601	-0.735867	1.6654	down	Defb19	Mus musculus defensin beta 19 (Defb19), mRNA [NM_145157]	CGTGAGGATCAGCCTCACAGGAGTAGATGACAACACTAACTGGTCTTACGAGAAGCACTG
A_55_P2220342	0.735785	1.6653	up	C230094B09Rik	Mus musculus 0 day neonate cerebellum cDNA, RIKEN full-length enriched library, clone:C230094B09 product:unclassifiable, full insert sequence. [AK082713]	GATTCTATTCCTGACCTTCTGTGATGAGTGACAGTCAAACAGCTATATCTTTAAGTATAT
A_30_P01026302	0.735763	1.66528	up		lincRNA:chr7:16584852-16657252 reverse strand	GGCAGGCAGAGGCAGCTATGAGGCTGGAAAAACCCCTCTTTTGGCTCTAGGTTCTCTGAG
A_30_P01025803	0.73531	1.66476	up		lincRNA:chr1:33965074-34060850 reverse strand	CAGGCCTTCTGGTGGAAGCACCTTGAACAGAGTGATAGAATTCTGGCTGCACCCGGCTGT
A_52_P250644	-0.734453	1.66377	down			GATAGAAGTAATGGTTCTCATGGAAAAGTCGAAATCGGAAAATGTGCAAAAACCGCTCCA
A_30_P01024734	0.734448	1.66376	up		lincRNA:chr7:113768215-113783490 reverse strand	ATCAAGCCTAACTTCTCCAGGTGACACTCAAGTCCTCTTTCTTTGGAAAAACCCCAATTG
A_30_P01025395	-0.73438	1.66368	down		lincRNA:chr9:68349343-68411643 reverse strand	CTGTACCATCCGCATCTTTGCAAATTTGTCCTAAGTGAAACCAAAACTAATGATTGTTTT
A_30_P01031595	-0.734367	1.66367	down		lincRNA:chr1:40113912-40114565 reverse strand	TTGTCAAATGAGAGGCAATCTTCACAAATGACCTTAACAGTGACCTTGAAGGGCTGGCAG
A_55_P2148416	-0.733418	1.66257	down	Gm14347	Mus musculus predicted gene 14347 (Gm14347), mRNA [NM_001085543]	CAGTCAACTTGTTAAGTAGATTTGGCCCTAGCTAAAATTGAGACAAAATAAAATCATGCC
A_55_P1956418	0.733034	1.66213	up	Efr3b	Mus musculus EFR3 homolog B (S. cerevisiae) (Efr3b), mRNA [NM_001082483]	GGGTATTCTGAAGTCATTTTTTAGAACTATTAGCTGTGGTTGGTGCCCTTTTCAAATAAA
A_55_P2230924	-0.732676	1.66172	down	C030017B01Rik	Mus musculus adult male cortex cDNA, RIKEN full-length enriched library, clone:B530033N09 product:unclassifiable, full insert sequence. [AK046738]	CTCACTGCCAATGGAAACAAACTATTTTCTTTGGAATCACTGAAGGATACAGAAAGAAAT
A_30_P01028865	0.732658	1.6617	up		lincRNA:chr3:145313275-145315057 forward strand	TCCTTGTTTTTCACGCAATCTGTCTATCATGATTTAAAATAAAGTTGCAGTGGATGATCC
A_55_P1970660	-0.732611	1.66164	down	Kdm3b	Mus musculus KDM3B lysine (K)-specific demethylase 3B (Kdm3b), mRNA [NM_001081256]	ATCTGGTCATTGCACTTTGCTGTTTGAATTGTGCTTAGTTGGGAGGAAGACAGACAGTGG
A_55_P2169953	0.732465	1.66148	up		RIKEN cDNA 4833413E03 gene [Source:MGI Symbol;Acc:MGI:1925354] [ENSMUST00000013706]	GCCACAGGATGGACCTCACTTCACACTTCAGGTCCTGGCTGGTATTGGTGCTTTGGATAG
A_55_P2072315	-0.732353	1.66135	down		taurine upregulated gene 1 [Source:MGI Symbol;Acc:MGI:2144114] [ENSMUST00000182875]	AGGCCTCCAGCGCACCTTCGGCCAATCACAGAGCTCGAAGTCTTCCCGCCCCCGCCCTGA
A_55_P2118095	-0.731758	1.66066	down	Gm10426	Mus musculus 0 day neonate thymus cDNA, RIKEN full-length enriched library, clone:A430110O19 product:hypothetical protein, full insert sequence. [AK040636]	GTGTTATGCTTCACCCCAGAACAAATATTGGTTTGGTTCTTATAATATTGCTTAACAGCA
A_55_P2278727	-0.731498	1.66036	down	Gm2085	PREDICTED: Mus musculus predicted gene 2085 (Gm2085), misc_RNA [XR_105215]	GTTTTAGGCTAAGAAGAGTCCAGCAACAGCTAACTGAGAGACCTGAATAAAGGGGTAAAT
A_30_P01020380	0.731333	1.66017	up		lincRNA:chr5:96591892-96606467 reverse strand	TAATGACCATAAGGATGCTGAAGATCAGGGAGCTGATATTTAGGCACTTGGTAGTGGAGG
A_30_P01018888	0.731091	1.65989	up		lincRNA:chr6:129151512-129208737 reverse strand	ATTCACAAGGTATTCACCCAACCCAATGCCATTTGAGATTCTATGACCTGTGGCCCGATT
A_55_P2028069	0.730243	1.65892	up			GTTTTCCCGAATTCCCCCTTAACATTACCTCTCATCAAACTTCTCATCCTACTGAGATGA
A_55_P2033225	-0.730189	1.65886	down	Cabp7	Mus musculus calcium binding protein 7 (Cabp7), mRNA [NM_138948]	TATGACACCTTCTGCGAGCACTTGTCCATGAAGGACATAGAGAACATCATCATGACAGAG
A_30_P01030765	-0.730045	1.65869	down		lincRNA:chr8:67542714-67561694 reverse strand	ATCACTAAGAACTTAGACTATCCTCTCTACGTTTTAACTAGTTTCTAAGGATTCCCAAGT
A_55_P2156953	-0.730004	1.65864	down	9430007A20Rik	Mus musculus RIKEN cDNA 9430007A20 gene (9430007A20Rik), mRNA [NM_198662]	CATGCATAAGGCCTCCCTCTAATCCATAGCAGGAAAGAATGATGAAACTTAAAATAAAAA
A_55_P1988260	-0.729304	1.65784	down		GBG5_BOVIN (P63217) Guanine nucleotide-binding protein G(I)/G(S)/G(O) gamma-5 subunit precursor, complete [TC1630414]	TTAAAATTAAGTCTTTAAAAAGTAAGTAGAGGCCGCCCCCTGCCCAGACTGACGAGTCAG
A_30_P01020876	-0.729267	1.6578	down		lincRNA:chr1:15837503-15838648 forward strand	CACTAAACTGGGATTGGATTTTGACTGACATTCTCGCTGAAGAAGAGAAGACAGTAGAGA
A_66_P110798	-0.729202	1.65772	down		Mus musculus blastocyst blastocyst cDNA, RIKEN full-length enriched library, clone:I1C0008L18 product:Ac1147 (Aa1011) (Aa1262) (Ab2-057) homolog [Rattus norvegicus], full insert sequence. [AK145507]	TTTCCCGTCCGGCTCTTCCGTGTCTACGAGGGGCGGTACGTCGTTACGGGTTTTTGACCC
A_55_P2186460	-0.729174	1.65769	down	Emx2os	Mus musculus Emx2 opposite strand/antisense transcript (non-protein coding) (Emx2os), long non-coding RNA [NR_002863]	GAAAGGAAGCCACAGTGTGGCCCAAAACTAACAAGTTGTTGTACAGCTTACAACCATCTA
A_30_P01027945	0.728646	1.65708	up		lincRNA:chr9:55786058-55797810 forward strand	AACGTCTTTTTCTTCAGTGCTGTTCTCTTTCTTGGACTGACGGTCTACCTCAGCTTTGTC
A_52_P579668	-0.72844	1.65685	down	4930564B18Rik	Mus musculus RIKEN cDNA 4930564B18 gene (4930564B18Rik), mRNA [NM_029230]	CCAGGTCGCTGTGTGTTATATGAGCCTATAGACACCCTGAAACATCGTGTACTGTTCTTA
A_55_P2285817	-0.728405	1.65681	down	4932441J04Rik	Mus musculus adult retina cDNA, RIKEN full-length enriched library, clone:A930022K23 product:unclassifiable, full insert sequence. [AK044558]	AAATAAGTCAAACACCAATAAAGTCTAGGAGCAAAGGAAGCGCGCGGTTGTTTGGAGGAG
A_55_P1979351	-0.728192	1.65656	down	Zxda	Mus musculus zinc finger, X-linked, duplicated A (Zxda), non-coding RNA [NR_003292]	CCATACATATATGTATTAGTAAATACTTAAACACAATCGGCCCAGTCTATGTAGTGTTGC
A_30_P01029584	-0.72803	1.65638	down		lincRNA:chr6:90915489-90940052 reverse strand	CGTGCGCTCGGCGCCCGGACCCGGGCCCTTCGCCACTGGGCGCCATCCCGGAGCTCGGCT
A_30_P01021215	-0.728019	1.65636	down		lincRNA:chr12:111617728-111665403 reverse strand	AGACCTCATCTGACTGAGCAGTAGGAAGCACCAGACACTGTCTACAGCTGCCCTGAGCTG
A_30_P01029559	-0.727972	1.65631	down		lincRNA:chrX:120331093-120331497 reverse strand	AACATTCTCCACTCTATAAGGTACCAGGGATCTGTACCTTTGACAGAAGTGTATATGGCA
A_30_P01027757	0.727905	1.65623	up		lincRNA:chr12:72103832-72116875 reverse strand	CTCCTACTGATCCCTATTTCTATTTAGATGTATTCCGTTGTTTGTGCCCATGTCGATGGT
A_55_P2158058	-0.727641	1.65593	down			AACATGAATAGAATACAAAAATGGAGGCGGGGCGTGAAGGCTAAAAAACGCCCTTTGGCT
A_55_P2163003	-0.72735	1.65559	down	Dsg3	Mus musculus desmoglein 3 (Dsg3), mRNA [NM_030596]	GTCTATGGCCTAAAATAACATGGAGAGAAGTGTGTGAATGTACATCATTTTAGGAAAATG
A_30_P01020068	-0.727287	1.65552	down		lincRNA:chr5:14921737-14978834 forward strand	TAAGGTAGGAACTGTCACAAACAGGAGGTCAGAGTAGTTCTGAGAACATGAGGTCATGGT
A_52_P235880	-0.727245	1.65548	down	Gm5134	Mus musculus predicted gene 5134 (Gm5134), mRNA [NM_198635]	ACAGGCCCGGAGAACGCTACCGAGAAGGAGTTAGAGGACACCTGGAAGAAGGTTGTATCC
A_30_P01028919	0.727109	1.65532	up		lincRNA:chr6:129151512-129208737 reverse strand	GCTTCTTTCTCCCAACTTTTGACATTAAGGATCTGTTCAGAAGACAAAAATTAGTGACTA
A_30_P01031167	0.72694	1.65512	up		lincRNA:chr9:58197113-58200614 forward strand	TGCTATCCTGTTACCATAACCTGTACCAGTACTGCCTCTGTTCTCGTACCCATTACCATC
A_51_P310821	0.726768	1.65493	up	Hoxa5	Mus musculus homeobox A5 (Hoxa5), mRNA [NM_010453]	GTGTAATTAATGCTGTTGTAGAGGTGACTTGATAAGACACAAATTAACTTGTTCAACGTG
A_30_P01025845	-0.726701	1.65485	down		lincRNA:chr10:81615171-81615810 forward strand	AACTGAAATATTGAGAACATAAATGATTTACCAGTCATAATAAATACATTCTAGTATTCC
A_30_P01020514	-0.726618	1.65476	down		lincRNA:chr17:39983902-39985688 forward strand	TCGCGTGTCCTCCCCGCTCCTGTCCCGGGTACCTAGCTGTCGCGTTCCGGCGCGGAGGTT
A_55_P1987384	-0.726385	1.65449	down	Defa-ps12	Mus musculus defensin, alpha, pseudogene 12 (Defa-ps12), non-coding RNA [NR_002878]	ATTCAAGGTTTTCAACTAGCAGGCCATTGTGGCCATCCTAAAGTCAGATTGCTGCATTAA
A_30_P01032901	-0.72638	1.65448	down		lincRNA:chr9:14480441-14483362 forward strand	GCCCCTTGGATGCTCCGTGTTTTCCTGTTACCTTGAAGTCTTACCTCAGGACTGTGACAA
A_55_P2193424	0.726256	1.65434	up	6720420G18Rik	Mus musculus 12 days embryo male wolffian duct includes surrounding region cDNA, RIKEN full-length enriched library, clone:6720420G18 product:unclassifiable, full insert sequence. [AK020112]	CACATGGAGTATTCAGTTGTTACGATGGTTTTTAATTTTGAGGTTCGTTTTGGGAATTAC
A_51_P473646	0.725661	1.65366	up	B230216G23Rik	Mus musculus RIKEN cDNA B230216G23 gene (B230216G23Rik), mRNA [NM_001242345]	AGTCCATCTTCTGTGACTTTGCATTAAGGTATTCCCATGACACAAGTGAGTGCCACATGC
A_30_P01022950	-0.725603	1.65359	down		lincRNA:chr5:14923900-15062725 forward strand	GAGGAAAAAGATCTACTGAACCTGTTAGCAGCTATGCATAATTTTATAAAAGCTGCCATT
A_55_P2004781	-0.725334	1.65328	down	Ass1	Mus musculus argininosuccinate synthetase 1 (Ass1), mRNA [NM_007494]	CCCCCACAGCTTTTGTTCCCTGGTCCCCTATAGCCTACAAAAGTGGTCATCGAAGGGAAG
A_30_P01028363	-0.725015	1.65292	down		lincRNA:chr8:13537677-13547026 reverse strand	TTTTCAAATTGTTCCTTTCTCCAAGAGACTCCCAGTTTACACACAGCTTATGACACCATT
A_66_P118165	-0.724812	1.65269	down			TAACAAGTCTATTACTTCGCTGGCACTAGAGCCCCCTTGCATGTGATTCCATCTTCTATT
A_51_P120093	-0.724805	1.65268	down	Snx10	Mus musculus sorting nexin 10 (Snx10), transcript variant 1, mRNA [NM_028035]	CTGGGAACCAGCAGAAGGAATTTTCACCTAAGAGGGATAACTTGTTGCTTCCAATGAATG
A_55_P2207543	-0.724748	1.65261	down	F530104D19Rik	PREDICTED: Mus musculus RIKEN cDNA F530104D19 gene (F530104D19Rik), mRNA [XM_003085248]	AGCTACAGTGAATACAGGAAGATGTCAGTGTTCAGAACACAGGAACACTTTCTAGAAGCC
A_30_P01018148	-0.724483	1.65231	down		lincRNA:chr7:6296401-6311486 reverse strand	ATTCCTAGTGCCAAGAGCTGGCTTTTCGGCATTTACTATGTTCCTGTGTGTTCCTCTACT
A_66_P118141	0.72439	1.6522	up	Sh2d2a	Mus musculus SH2 domain protein 2A (Sh2d2a), transcript variant 1, mRNA [NM_021309]	CGAGTCTCTGGAGGTAGCCTTTGCCACTGTTTCTCTCTCTGTGTAGCTCCCCACACAGCT
A_55_P2010376	0.724324	1.65213	up	Grm4	Mus musculus glutamate receptor, metabotropic 4 (Grm4), mRNA [NM_001013385]	GTTGGGAGCAGGCACGAGGGAGCCCCTGCATCTTCTGCAGTTGTTGGAAATTTTCCATAA
A_52_P406036	0.724313	1.65211	up	Cdkn2aip	Mus musculus CDKN2A interacting protein (Cdkn2aip), mRNA [NM_172407]	GTGTGGAAAACACTAACATAAGTGAGTTGTAAAAAACACTGTCAAGTTTCTTCTGTTGTG
A_55_P2068350	-0.724142	1.65192	down	Ido2	Mus musculus indoleamine 2,3-dioxygenase 2 (Ido2), mRNA [NM_145949]	CGATGATGATGATGAAGATTATGATAACTACAGTCACTGCAATAATGACGGCAAAGATAA
A_55_P2164172	-0.723896	1.65164	down	Rs1	Mus musculus retinoschisis (X-linked, juvenile) 1 (human) (Rs1), mRNA [NM_011302]	CTCTCTGCAGCCTGCAGATCAAAACAAAACAAAACATTATGGTAAAGCATAACAATTTAC
A_55_P2195859	-0.723466	1.65114	down		RIKEN cDNA E130218I03 gene [Source:MGI Symbol;Acc:MGI:3528958] [ENSMUST00000143448]	TTAGGCCACTCAGGTGGACGTGTCCATCTCAGGGATATCAGTGGACACTTCTGTGGGCAC
A_30_P01023937	-0.723459	1.65114	down		lincRNA:chr9:27148989-27155714 forward strand	ATTAGGGCCACATACCTTAGACCCTCCAACTGATGTGATTTTCAGAGATGTTGGAGACCA
A_30_P01020376	-0.723403	1.65107	down		lincRNA:chr16:40312038-40315564 forward strand	GCCATTCTTGGAGAATTTGCCTAAAAACATAAGGACAACCAGCAGAGATTAATTTTATCA
A_30_P01033492	-0.723208	1.65085	down		lincRNA:chr8:27129927-27137444 forward strand	CGAGGTTTTTATTTTAGGAGACAGCACCTTAAAGGGTAAGAAAAATCTCATTCAACAGAA
A_55_P2391000	-0.723118	1.65075	down	4933430L12Rik	Mus musculus adult male testis cDNA, RIKEN full-length enriched library, clone:4933430L12 product:weakly similar to gastric mucin (clone PGM-2A) (fragment) [Sus scrofa domestica], full insert sequence. [AK016998]	CATTGAATCAGACAAAGAATGGGAGGAAGGGGAAAGCTATTTATAAACGGTAAAGCTTCG
A_30_P01021218	-0.722906	1.6505	down		lincRNA:chr16:23992037-24001037 reverse strand	ATGTCCTGAAATAGTTCCCATATTCACAAGAAGCCTGGCAGCTTAAAGACTACCCAGCTT
A_55_P2048800	-0.722827	1.65041	down	Cd82	Mus musculus CD82 antigen (Cd82), transcript variant 3, mRNA [NM_001271432]	GTGATCCTGGGCTTCGGGGTGTGGATTCTTGCAGACAAGAACAGCTTCATTTCCGTCCTA
A_30_P01032264	-0.722687	1.65025	down		lincRNA:chr13:108548345-108679004 forward strand	AAATTCTGGAAGGCTTGACATTAACCACAAAAACCAAGGGAGGAGAGGCACAGAGAGGTA
A_30_P01026161	0.721836	1.64928	up		lincRNA:chr1:161992257-161992963 forward strand	CGTATATATGCAGTAATTCCTATAACCAAGAGGCTGAGGCATAAGAATCACAGGTTACAA
A_55_P2419711	-0.721611	1.64902	down	4932412D23Rik	Mus musculus RIKEN cDNA 4932412D23 gene (4932412D23Rik), transcript variant 1, long non-coding RNA [NR_040521]	GCATCATTCACTCGCTCCTCTTGACAGTACTTCACTTAACTCTGTAATAAACTATCTTTT
A_55_P1965605	-0.721128	1.64847	down	Smyd3	Mus musculus SET and MYND domain containing 3 (Smyd3), mRNA [NM_027188]	GGAGAAGCTGATGCGTTGTTCTCAATGCCGAATTGCCAAATACTGCAGTGCCAAGTGTCA
A_30_P01023475	-0.721108	1.64845	down		lincRNA:chr10:98718526-98719169 reverse strand	TGTACAATGGCAGTTTCCACGTAATTAGTTAAATATTATCTTACTGGTCAAGGCTGGGGT
A_30_P01022987	-0.720875	1.64818	down		lincRNA:chr7:50509139-50526856 reverse strand	ATGCAGCTTCCTCTCCTACTGTCCATGCCTCAGGCAGACACCACAGACAATCCCACCTTT
A_55_P2055060	-0.720808	1.6481	down	4930547M16Rik	Mus musculus adult male testis cDNA, RIKEN full-length enriched library, clone:4930547M16 product:unclassifiable, full insert sequence. [AK016061]	ATGTACAAGCTGCAACCCATGCACAAGACGATCCAAAGTTGCAAAACGTTGGAAGAAACC
A_55_P2106529	-0.720743	1.64803	down		Q6IGU0_DROME (Q6IGU0) HDC05200, partial (5%) [TC1646147]	CAAGGCCCAAACGCTTACTCTCATGAATAAACAGTGAAAAGAGTGATTATTAAGAGATAA
A_30_P01024758	-0.720132	1.64733	down		lincRNA:chr13:41337973-41379821 forward strand	AACATCATACTAAGAAGTTAGTCAACACAGACCCTAAAAGACACAGCACAGCGCTGCTGG
A_51_P269257	-0.720073	1.64727	down	4930579G18Rik	Mus musculus RIKEN cDNA 4930579G18 gene (4930579G18Rik), long non-coding RNA [NR_038053]	AACAGACCTTAACAAAAGATTCAGTCCTACTACAACCCTAGTACACGAGAGACTAGGGCA
A_30_P01028252	-0.719945	1.64712	down		lincRNA:chr3:41158056-41173053 forward strand	AACCTTCAAAGACTCTGAAGGAGCAGAGGGGACACAATGGATCATTAACAGACAGGATGA
A_30_P01028737	0.719783	1.64693	up		lincRNA:chr12:109619407-109619843 forward strand	GGCGCAGACTTCAGAACATCCTGTGGCACACATTAAATCACATGTAAAGTAGTTTGCTTA
A_30_P01018318	-0.719758	1.64691	down		lincRNA:chr4:116790373-116797823 reverse strand	ACGCAAGGATAGTGGAGATTCATTGAAAGTTTTTGGCAAGGGAAAGGGACTGAGAGAAGA
A_55_P2044069	-0.719572	1.64669	down	Dnm3os	Mus musculus dynamin 3, opposite strand (Dnm3os), long non-coding RNA [NR_002870]	GAATGCCAGGATGTGGAAATAATCAACCTCATATTTAAAAGCACAATGGAAGTTACTTTC
A_30_P01024246	0.719428	1.64653	up		lincRNA:chr9:31834945-32015745 reverse strand	GTACTGCCACAGGACTTAAGAGTCAGGTCTCCAGGGATCTCAGGGACATCTGCTCCTCTT
A_30_P01020548	-0.719286	1.64637	down		lincRNA:chr13:94725285-94725556 forward strand	GTTAAATGTTACATAAAGACAGAAAATTTCACTGGATCAGGAAAGCATGCCATGACTATC
A_30_P01028835	-0.719282	1.64636	down		lincRNA:chr1:92549499-92550225 reverse strand	TATGAAAGCTAGGGTCTCTTTAAGTCTGGACTAGGAGAGTAGGATCAGGAATGCAATGGG
A_30_P01033558	-0.719104	1.64616	down		lincRNA:chr13:44752412-44803566 reverse strand	CAGCAGGGCGGCCAACAAAAACACTGTGCATGGATTTGTGATGGAATCAGATTCATCAAT
A_55_P1979541	-0.718849	1.64587	down	Gm13490	Mus musculus predicted gene 13490 (Gm13490), long non-coding RNA [NR_040639]	CTGGGTAACACAAGAAATGGCTTATTTGATTACATTCTTAGAGTGAGAGTAATTCTGAGT
A_55_P2122394	-0.718654	1.64565	down			TGGTCAGTTTCAGAAAAGGAAGCCAACCATGTCAGAAACCATAGTTGTCTGTCCTCCTAA
A_30_P01032254	-0.718635	1.64562	down		lincRNA:chr8:37582187-37621987 forward strand	AAATTTGGTAACTGTGACATCACTGTCTTAGCCAGCCCAGGGAAACAGCCTTTTATGGCA
A_51_P188281	-0.71862	1.64561	down	Myf5	Mus musculus myogenic factor 5 (Myf5), mRNA [NM_008656]	TTGTATATGCCTTAAAATAACTTGATAAATAAATGTACTATTATTATCAATAAAATATTT
A_55_P2103320	-0.717995	1.64489	down	Gm12508	PREDICTED: Mus musculus predicted gene 12508 (Gm12508), mRNA [XM_003946132]	TTCACAGGAACATGGAAGATTTGGGACTCGGTCTATTGGAAAAAGAGGGCACCTGGAAAT
A_66_P100186	-0.717703	1.64456	down	Psg28	Mus musculus pregnancy-specific glycoprotein 28 (Psg28), mRNA [NM_054063]	ACATTATACATCAACGGGTCCCTGTGGATCCAAAATGTCACACAGGAGGACACAGGATAT
A_51_P509384	-0.717627	1.64447	down	Aldh8a1	Mus musculus aldehyde dehydrogenase 8 family, member A1 (Aldh8a1), mRNA [NM_178713]	ACAAAGCTTTGAAGATGAGCCTCTCAGCCCCATAGCTACTACCCAACTTTGACTGCTAAT
A_30_P01031739	-0.717497	1.64433	down		lincRNA:chr17:38132217-38157667 forward strand	TCAATGCAAATGACAAGAACTTATTTCAATTAAATTACTACTGACTGATCAGGCGCAGCA
A_55_P2034645	-0.717439	1.64426	down	Fam227b	Mus musculus family with sequence similarity 227, member B (Fam227b), mRNA [NM_029455]	CAATCATCATCGTCATTTCCTACTATATCAGAAGACTTCAACAATGTGGAAGAGGGCTAA
A_55_P2153620	-0.71692	1.64367	down	Ahnak	Mus musculus AHNAK nucleoprotein (desmoyokin) (Ahnak), transcript variant 3, mRNA [NM_001039959]	TTGTGTGACCAAGATTCGCAAAGAAAGAGAGAGAGAGACCGATACAGAAAGAGAAGAAGG
A_30_P01031800	-0.716817	1.64355	down		lincRNA:chr15:83266264-83294664 forward strand	GTAAGGACTTGTTCTTCCTCATGAAGGAATAGCATCCCTGCAAGGAGCATCCACTCAGGT
A_30_P01030396	-0.716804	1.64354	down		lincRNA:chr4:131903928-131909578 reverse strand	TTGGAGAAAGACCTCAGTTTCCAGGGTGAAGCTTGGAGAAACTTCACAGTTTACCATCCA
A_55_P2163857	-0.716662	1.64338	down	Trim12c	Mus musculus tripartite motif-containing 12C (Trim12c), transcript variant 1, mRNA [NM_001146007]	TATTTTTGAAGAGCATTGATAGTCTAAATCATGTTAGAGAGGAGGGAAGGGAAGGGAAGG
A_66_P108733	0.71659	1.64329	up	Arhgef38	Rho guanine nucleotide exchange factor (GEF) 38 [Source:MGI Symbol;Acc:MGI:1924919] [ENSMUST00000054105]	TGGAAGAGGTTCACAGCCTGACTTTTGTAAAGGAGAACAGTGCCACCTTCATTGAGAGGA
A_30_P01018566	0.716263	1.64292	up		lincRNA:chr4:138653689-138688814 forward strand	TTACTTGGAAGTCTGTGGTCTGGGTCGCTAACCTTTCTTACTGTCAGGGATACTGTAGAT
A_30_P01030647	-0.715961	1.64258	down		lincRNA:chrX:18744367-18853992 reverse strand	GAAATGACAAAGACAAATGTATCATACTGTAAGGACACTGCTTTGTGAGCATCAGATAAT
A_65_P16630	0.715813	1.64241	up	BC068281	Mus musculus cDNA sequence BC068281 (BC068281), transcript variant 1, mRNA [NM_001170858]	ATGCTCCATATGTTCACCTCATTTACCAGAACCCTTGTTCTGTAGGTCCCACTGAGAGAA
A_30_P01030736	0.715812	1.64241	up		lincRNA:chr13:74568375-74601000 reverse strand	TTAAGAAGGAATGACTTTGACAGATACAGTTCTCATTCTGTGTCTTTAGAACCTGAGCAT
A_55_P2087963	-0.715626	1.6422	down			ACAAAATTGTAAAGGCTGTGGGATGGGTGGGTAGGGAAAGTGAAGTCAAATAATGCCAGC
A_55_P1999369	-0.71551	1.64206	down	Spopl	Mus musculus activated spleen cDNA, RIKEN full-length enriched library, clone:F830209F04 product:unclassifiable, full insert sequence. [AK157283]	ACCTCCTCTTTATTGGGGTGGAAGGAGAAGTAGTAAAAGACTGGGGAAATTACATTCCCC
A_30_P01018509	-0.71495	1.64143	down		lincRNA:chr2:94082835-94101939 reverse strand	AGTCAGACCTAGTGAAGCTTTACTTGTGACTGTTGGGACTGATTAAGAATATGGGGGCAG
A_66_P109436	-0.714881	1.64135	down	Ttc25	Mus musculus tetratricopeptide repeat domain 25 (Ttc25), mRNA [NM_028918]	GACCAGTGGCAGTGCTGATGGGAGCCTCCAAAAAGCTGAGAAAGTCCTTAAGAAGGTTCT
A_55_P2373774	-0.714659	1.64109	down	B430319H21Rik	Mus musculus 4 days neonate male adipose cDNA, RIKEN full-length enriched library, clone:B430319H21 product:hypothetical protein, full insert sequence. [AK021026]	GGGGAAGGTGGACAGCAATAAGGTTGTAAAGTGAATTTTTTAAAAAGTGTGTTTTAGCAA
A_55_P2242575	-0.714573	1.641	down	4930466K18Rik	BY715062 RIKEN full-length enriched, adult male testis Mus musculus cDNA clone 4930466K18 5'. [BY715062]	ACGAAGCTCTTAGATCAGCGATAGGGCTAATCATCGGGGGGCCGGTACAGTTTTATTCCC
A_30_P01018885	-0.714283	1.64067	down		lincRNA:chr13:44752412-44803566 reverse strand	CGCTTGCCTAATAAATATAGATTAAAAGGATATCCAATATCTGCCTTAAACCCACAAAGG
A_51_P195567	-0.713964	1.6403	down	1700017D01Rik	Mus musculus RIKEN cDNA 1700017D01 gene (1700017D01Rik), mRNA [NM_027058]	CCTTCAACACAGCCATCTATGCTTGAGTTGGAGAATGTCTCTGAACAATCCCATCCAAAA
A_55_P2235832	-0.713934	1.64027	down	Gm10278	PREDICTED: Mus musculus predicted gene 10278 (Gm10278), misc_RNA [XR_141035]	TACTAAGAAGGTAGCCAACTAAGCAGACAACTACATTCACTGTGATCACTGCCACAGGAC
A_30_P01032481	-0.713804	1.64012	down		lincRNA:chrX:123303474-123305531 forward strand	AGAAAACTACAGGAAAAAATGTGGTTAAAATGGATGAAATTGATGGAAAAACAGGCTGTT
A_30_P01028767	-0.713615	1.63991	down		lincRNA:chr1:173250734-173259306 forward strand	TCAAGGCAAAGGTGAACTCCAGATCGTGACCTTTCACCTCAGTTCACCGGGCAGTCCGAC
A_55_P2170834	-0.713478	1.63975	down		AGENCOURT_10740689 NIH_MGC_156 Mus musculus cDNA clone IMAGE:6754668 5', mRNA sequence [CA461216]	TTTGGGAAGACTCTGCACCCCTGAGAGATCCCGCCCCTCTTTCTTCTCTGACTCAGGGTA
A_30_P01024609	-0.713292	1.63954	down		lincRNA:chr9:88575075-88611650 forward strand	ATCTTCATAAAGGACTTCATCTACCTTCATGTCATGCTCATCCACTGGGATCTGGGGACA
A_30_P01025851	0.713149	1.63938	up		lincRNA:chr3:50267902-50431577 forward strand	ATCTGCTGTCATCACAATGAACTCAGAGATGCCTGTGTTGAGGGTTTTAGTGGCTTCACT
A_30_P01032866	-0.712771	1.63895	down		lincRNA:chr5:109156118-109156422 forward strand	CCTGGAATTAAATGGCTCCCAAAAGCTCAATTGTGACGAAATAAAAATAGTGTCAAATGC
A_55_P2235970	0.712722	1.63889	up	C130068B02Rik	Mus musculus 16 days embryo head cDNA, RIKEN full-length enriched library, clone:C130068B02 product:unclassifiable, full insert sequence. [AK081691]	GAATTTGACATTGTGCACTCCAATTCCCATCATTCCATATGTACCATCCATCCTTGCAAT
A_30_P01027557	-0.712648	1.63881	down		lincRNA:chr13:54399275-54445825 forward strand	CAGTCCCTGCGCAGTCTATGGACAGCAGTTTTGGGTGAGAATGGGAAGGAAACAGGAAAG
A_55_P1997450	-0.712434	1.63857	down		predicted gene 7942 [Source:MGI Symbol;Acc:MGI:3646599] [ENSMUST00000163216]	AGTGCTATGATGAATTTGCTCAAGTCTCTGTAGAAAGATTTGCCCAAGTTTGTCAGGATC
A_55_P1977284	-0.711819	1.63787	down	Zbtb9	Mus musculus zinc finger and BTB domain containing 9 (Zbtb9), mRNA [NM_001005916]	AAACGTTTCAAGTTGAAGCATCATCTAACAGAGCACATGAAGACCCATGCGAGAGCTCTG
A_30_P01032148	-0.711719	1.63775	down		lincRNA:chr16:4867322-4874772 reverse strand	ACAAGGAAGAAGTGGGCCTTAATGATGCCTTAAGCAAAATGCCAAGAAAAGGGATTTATG
A_55_P2179706	-0.711607	1.63763	down			CAGTTAGATGGATAAGGAAAGTCTATTGGCTGTCACATTTTCCACATAGAAGAAACATTT
A_55_P1975110	0.710962	1.6369	up	Pnpt1	Mus musculus polyribonucleotide nucleotidyltransferase 1 (Pnpt1), mRNA [NM_027869]	CAATGGCGATATTCTGTGGAGCAAATTTTAACAGTCCTGCTTACTGTGTAGATTTATATA
A_30_P01020913	-0.710717	1.63662	down		lincRNA:chr13:64018565-64082570 reverse strand	AACTAGCACAACTCATCATGAGTTATCTAACACAGCTGGAGAAACCTGGGCTTCCACAGT
A_55_P2115577	0.710534	1.63641	up	Slc20a1	Mus musculus solute carrier family 20, member 1 (Slc20a1), transcript variant 2, mRNA [NM_001159593]	TCTCCTAGAAGGTGGCTGGCCTGCATCCATTTCAGAAGGCTGCAGGCTAGTGTATGCTGA
A_55_P2180056	-0.710244	1.63608	down	1500004F05Rik	Mus musculus visual cortex cDNA, RIKEN full-length enriched library, clone:K230002H02 product:unclassifiable, full insert sequence. [AK158492]	TCCCGGCAGGAGAAGGGCCGGCCCGACATCCCGGGAGCCGTCCCCGCAGGCCGCCCCCAC
A_55_P2147747	-0.710136	1.63596	down	Maml3	Mus musculus mastermind like 3 (Drosophila) (Maml3), mRNA [NM_001004176]	ACTTAAACTATTTTAATCCTTGGACCCAAGGAGAAGGCTGATAGGGGGTGGATTAAAAAA
A_51_P475788	-0.709997	1.6358	down	Klrc2	killer cell lectin-like receptor subfamily C, member 2 [Source:MGI Symbol;Acc:MGI:1336162] [ENSMUST00000071920]	TTATTGCGTCAGGATGTGTAGCTTCTTCAATAGAATCACCACAGCATAGAACACAAGTAG
A_30_P01022946	-0.70997	1.63577	down		lincRNA:chr1:23340097-23340552 forward strand	TGCATATATTGGAATGCAGGAATAGAGTTACATGTATACACATAACACTCACTACTCCCA
A_55_P2320403	-0.709686	1.63545	down	B230207O21Rik	Mus musculus adult male corpora quadrigemina cDNA, RIKEN full-length enriched library, clone:B230207O21 product:hypothetical protein, full insert sequence. [AK140083]	TGGTTTTATCTCTACGATCCTTTGTTTTCCAACTGAAATAAAGAAGCGCTCAAAGCCCGC
A_55_P2302978	-0.709482	1.63522	down	1700048F04Rik	PREDICTED: Mus musculus RIKEN cDNA 1700048F04 gene (1700048F04Rik), misc_RNA [XR_168421]	TTACTTCTCTGGGGTTCCTAGTTAGTCCTGAAAACACCGCTATTAAAGTCATCATTAAAC
A_55_P2034651	-0.709462	1.63519	down			AGAAGTGCGGATTGAGACGCGAAGGTCTGATTGTAATAGATTTGACCAAACTGCCTAGTC
A_52_P385606	-0.709322	1.63504	down	Ckb	Mus musculus creatine kinase, brain (Ckb), mRNA [NM_021273]	GGCCGGATGCTCGTGGCATATGGCACAATGACAATAAGACTTTCCTGGTGTGGATTAACG
A_30_P01029423	-0.709261	1.63497	down		lincRNA:chr13:62734450-62785325 forward strand	GAACTTTTCAGTGAGGGTGTAATAGCACATGACATCTCCTCCAGGAACATAGAACTTCTC
A_55_P2389533	-0.709139	1.63483	down	AA517446	vh79a11.r1 Knowles Solter mouse E6 5d whole embryo Mus musculus cDNA clone IMAGE:893180 3'. [AA517446]	AACTGAATAGTTTTAAGAAGTCTGAAAAGAGCTGACCTGGAATGGGCTGTTAATGTCCCC
A_30_P01029321	-0.708922	1.63458	down		lincRNA:chrX:150159252-150181275 forward strand	AGGCCAGAAGAAAATGAGACAGACTATAGTGACAGAAGAAGAAAGGACTTCACCTTCTTT
A_30_P01021154	-0.707815	1.63333	down		lincRNA:chr13:19611679-19620954 forward strand	AACACTCCTAACCAATCTTCTACAACACACTTTGAATAATACTGGAGACACTCCTATTAA
A_55_P1981929	-0.707766	1.63327	down	Scg5	Mus musculus secretogranin V (Scg5), mRNA [NM_009162]	CCAATGCCTGTGCTTTCTGCTACATTAGAATAAAAGCTCCTTCTCTTTGGGGGATTTTTT
A_51_P184949	-0.707642	1.63313	down	F12	Mus musculus coagulation factor XII (Hageman factor) (F12), mRNA [NM_021489]	TGTACACAGACGTGGCCAACTACCTGGCTTGGATCCAGAAGCATATTGCTTCATAACTAA
A_55_P2295026	-0.706664	1.63203	down	AU067648	AU067648 Sugano mouse brain mncb Mus musculus cDNA clone MNCb-0155 3'. [AU067648]	GCCACACAAGTATTATCTCATAGAATGCCAATAATAGTCAAATTCTCCCATTGCCATTAA
A_55_P2362391	0.706219	1.63152	up	E130112N10Rik	Mus musculus RIKEN cDNA E130112N10 gene (E130112N10Rik), long non-coding RNA [NR_015604]	GACAGCCAACGCATCACCTTTCATCTGTATATTCTCTTTATACTATAAAATTGGAACTCT
A_55_P2110577	-0.705921	1.63119	down	4933431J24Rik	Mus musculus adult male testis cDNA, RIKEN full-length enriched library, clone:4933431J24 product:unclassifiable, full insert sequence. [AK017006]	GCAAGGCAAGAGGAATCCAGGTCATTTGTTGAATATTTTAAACTTCCAGAAAATGACTTT
A_55_P2263557	-0.705782	1.63103	down		RIKEN cDNA 4632419I22 gene [Source:MGI Symbol;Acc:MGI:1921288] [ENSMUST00000128960]	CTTCACATCAAAATTAATTAATTGAACATTAAGCATCTAATAAAAAGTTATATATATTCC
A_55_P2064538	0.705746	1.63099	up	Gm13154	Mus musculus predicted gene 13154 (Gm13154), mRNA [NM_001014397]	GTGTGCTTCGAGTATCTACTAATCAGAATTCTTCTCAAATGCTTGTTTGTCATTATAGGA
A_55_P2314321	-0.70539	1.63059	down	BC065403	Mus musculus adult retina cDNA, RIKEN full-length enriched library, clone:A930005F02 product:unclassifiable, full insert sequence. [AK020810]	TGGGAGAAGGCTAAGGCAAAACTCGTAAGAAATGCTGGAGCCACAAATAAAAAGGAACCT
A_66_P123538	-0.705209	1.63038	down	6720432D03Rik	Mus musculus 12 days embryo male wolffian duct includes surrounding region cDNA, RIKEN full-length enriched library, clone:6720432D03 product:unclassifiable, full insert sequence. [AK020119]	TCTGCAGGCAGGTCTGTTTTTGCAATGCAGCCACGTTTAAGCTTGCTTTATCACCATTAG
A_30_P01022284	0.705117	1.63028	up		lincRNA:chr4:135911688-135915355 forward strand	TTCCACTGCTGTGTGTGTGTTACTCTGTAAACCTGGTGTTACTTTAATAAACTGTTGTCT
A_55_P2197065	-0.704871	1.63	down	1700112J05Rik	Mus musculus RIKEN cDNA 1700112J05 gene (1700112J05Rik), long non-coding RNA [NR_077218]	ATCCAGACCTAGTACTAGGATCTGCTTATTTTCTACCTGTGAAATAAAAGGTAAACCAGC
A_30_P01023063	-0.704779	1.6299	down		lincRNA:chr18:67435075-67447150 reverse strand	GCCTCAGCATAACAAAACAGTGGTCTTGTCTTCACACTTACATGACGTTGTAGTAATCCC
A_30_P01030239	0.704555	1.62964	up		lincRNA:chr13:28506971-28511732 reverse strand	ACCCAGGTCTGGATGTGGTGGCATTTTTTCAGAGAGTGGAACTGAAGATGGATGAAGCAG
A_30_P01031384	-0.704402	1.62947	down		lincRNA:chrX:121032646-121038407 reverse strand	CTGAAACTAAGACACCAGAAAATTTTACATCTGAAAAAAGATCTTCTGAATCCACCAGGA
A_30_P01024926	-0.704075	1.6291	down		lincRNA:chr13:54399275-54445825 reverse strand	AGGAGAGTCAGACACCAAGCAGAGTAGATAGCACAGCAGAGATGCTTAACTTCCTAGAGA
A_55_P2065661	-0.70396	1.62897	down	Zfp109	Mus musculus zinc finger protein 109 (Zfp109), mRNA [NM_020262]	AAATTCAAAACTTATATAGAGAAGATCGGATTTCTAATTTTCTATCTAATTTAATATCTG
A_55_P2161026	-0.703863	1.62886	down	Slc24a2	Mus musculus solute carrier family 24 (sodium/potassium/calcium exchanger), member 2 (Slc24a2), transcript variant 2, mRNA [NM_001110240]	CATAACGAATGTGAATGGAGAGCCGCTGAAAGAAAAGACCCAGAACAGCTGTATGGAAGA
A_55_P1988789	0.70375	1.62873	up	Acss2	Mus musculus acyl-CoA synthetase short-chain family member 2 (Acss2), mRNA [NM_019811]	TTTCTTGTTCTTTTTGTGCTCAAGACCCACTGTTATAGGAATAAAGTTTATGAGCTCAAG
A_30_P01020567	-0.703602	1.62857	down		lincRNA:chr2:108456668-108532418 forward strand	ATACACTGATCTTCTTGGGGAAAGGAAGAGTGCAATGCAGGTTTGCTAATGTGGCAGACA
A_55_P2117784	-0.703467	1.62841	down		RIKEN cDNA 4732440D04 gene [Source:MGI Symbol;Acc:MGI:3604103] [ENSMUST00000097832]	GTCGACTCGGCCTTTCCGCCGCAGAGCACGCCGGGAAACAGCCAGCCGGGGGAGGGGTGA
A_30_P01032710	-0.703074	1.62797	down		lincRNA:chr6:82608223-82669023 forward strand	GAAGTGATATGTGCCCAGGACTACTCCTGAACATTGAAGAATCCCGGACAGAAACTAAAA
A_55_P2093624	-0.703037	1.62793	down	Dmd	dystrophin, muscular dystrophy [Source:MGI Symbol;Acc:MGI:94909] [ENSMUST00000114000]	CATTCTTGTGGCATGTGTTGCTCTTCAGTCTTTGCCATAAAAAGTAGCAAACAATATTAC
A_55_P2294109	-0.70267	1.62751	down	1700047E10Rik	Mus musculus RIKEN cDNA 1700047E10 gene (1700047E10Rik), long non-coding RNA [NR_073363]	GGAGGGGAGTAAAGTGTCAATCTGATCAACATATATGTGTGTGTAATATTTTCAAACAGT
A_30_P01030589	-0.702599	1.62743	down		lincRNA:chr15:61984389-62102500 reverse strand	AATTAAGCAGTTGACTTGGATAAGACTTAACATCTCTGGTCCCAGGGGGATAACTTTTAC
A_30_P01031729	0.702457	1.62727	up		lincRNA:chr16:4585697-4594022 reverse strand	ATAATTGGTGCTCCTGATGTGGTGATCAAATGGATACGTAGTCAGTGCTCTTAACTGATT
A_30_P01033001	0.702405	1.62722	up		lincRNA:chr10:16603950-16794075 forward strand	TTCTCATCTCCATGGTAACAATTGTAAGTCCAGGCAACGTGGTCACCCAGTTTCTAAAGG
A_30_P01020255	-0.702284	1.62708	down		lincRNA:chr4:101010948-101032148 forward strand	CCCTCGGAGTGAAGGACTGAAAGATGCACTTCTGGATGGAGGCAAAAAGCAGAAGAAAAG
A_66_P132861	-0.701841	1.62658	down	Gm9918	PREDICTED: Mus musculus predicted gene 9918 (Gm9918), misc_RNA [XR_168542]	ACTGTATCATTGTTGGATTAAATGTGAACGGGATCGTGAACATTTTAGTAATAAAATACT
A_55_P2186170	-0.701714	1.62644	down	Oprd1	Mus musculus opioid receptor, delta 1 (Oprd1), mRNA [NM_013622]	GCAGGTTTGACAGAAAGGACCTTTATCCACCAACCCCAATTAAAAGAAATTATTTATTTG
A_55_P2106641	-0.701668	1.62638	down	Aqp9	Mus musculus aquaporin 9 (Aqp9), transcript variant 2, mRNA [NM_001271843]	ATCACGGGAGAAAATGGAACGGCGTTCATTTTCGCGACATACCCAAAACCATTTGTATCC
A_55_P2063316	0.701411	1.62609	up	Mgll	Mus musculus monoglyceride lipase (Mgll), transcript variant 1, mRNA [NM_001166251]	AATTACTAAAGAAGCCAATGTGCACTACAGCTCACCGTAATAAAAACCACGTGCTTTTGG
A_55_P2149393	-0.701408	1.62609	down			TCTGCAGATCTAAGAAGGAGAACAGCTGCCATCGCTGCATTTTTTATCTTATCCTGCTTT
A_30_P01025652	-0.7014	1.62608	down		lincRNA:chr12:85210777-85262127 forward strand	TAAAAATACAACTGAAATATATGAAGATATACATACAAACATACCTTTCCAAAGCAAAAG
A_66_P128038	-0.701163	1.62581	down	Gm3300	Mus musculus adult male testis cDNA, RIKEN full-length enriched library, clone:4930401D09 product:unclassifiable, full insert sequence. [AK015033]	GCTACATGAAACTATCTCAAAAAGAAGTAATGGTGGTCATCACTGTAACAAGTTATGAAG
A_55_P2137073	-0.701144	1.62579	down			AAGTCAGAAGATAACTGGAGGGATAGACATCACAGGAACCATTTACATTCACCTCTGCAG
A_30_P01032219	-0.701132	1.62578	down		lincRNA:chr12:110002978-110003360 reverse strand	TGCATCACTCACTGCTGCTGATCAGTTGTAAGAAGGAGCAGGAAGGAGGAGGGTGGGGAA
A_30_P01025674	-0.701018	1.62565	down		lincRNA:chr8:94841965-94881130 forward strand	AACTGTAAAAGTATTAGGCCAGTTCAAGATAACATCAAACAAACCCAGTAAGTCTATGAC
A_52_P628411	-0.700898	1.62552	down	Far2	Mus musculus fatty acyl CoA reductase 2 (Far2), mRNA [NM_178797]	TCTGAAACGACAGCAAATTATTTCCACTATAAATTTTCCAATTCCATGTAACATGCCTGC
A_66_P118741	-0.700862	1.62548	down	Vmn1r37	Mus musculus vomeronasal 1 receptor 37 (Vmn1r37), mRNA [NM_134165]	GATAAGCGAATAATCATTATACTAAAAAGTATGCAAAAATTATGGCACCAGATTTTTTAA
A_52_P294514	-0.700841	1.62545	down	Samt4	Mus musculus spermatogenesis associated multipass transmembrane protein 4 (Samt4), mRNA [NM_029199]	TTCTGGTTTTCAGTGTGATAGCTTTCAGGATTAGCTGCATGAAAGATCCATTTCTAATGA
A_30_P01019728	-0.700517	1.62509	down		lincRNA:chr14:46374363-46612845 reverse strand	AATCCCATGAGATATATAAGCAAATCATCACACCTCACGGGAACTTAGTCGCCATCTCTA
A_55_P2065508	-0.700111	1.62463	down			CTATTACTGTGCAAGACACAACCTATTTTTCTTTTTTAGCTTTTCACAAGGACATCCATG
A_55_P2406758	-0.700043	1.62455	down	5330427O13Rik	PREDICTED: Mus musculus RIKEN cDNA 5330427O13 gene (5330427O13Rik), misc_RNA [XR_141214]	GCTTCTGATAAAAGAAAACGGATCTTTTAAGTCCTATATAGGAATCTACATTTTGGAGGC
A_55_P1969792	-0.699782	1.62426	down		BX514557 Beier day 7 kidney Mus musculus cDNA clone IMAGp998P061798 ; IMAGE:732917, mRNA sequence [BX514557]	TGGTTCAGAAGATAGCTGGATTGTGGCGTGATGTTGGGGGAATAGAAATCTTCTCAATCC
A_65_P02323	0.699603	1.62406	up	Sec22b	Mus musculus adult male diencephalon cDNA, RIKEN full-length enriched library, clone:9330109A20 product:unclassifiable, full insert sequence. [AK079056]	CCTCTTGGGAAACATTTAAATCTGAGACTATGAAGAAAGATCTAGTCTGCTTTCAGCGTC
A_30_P01018004	-0.699225	1.62363	down		lincRNA:chr14:65720392-65769859 forward strand	GAACCAGCAGCCAAACGCATACATTTCTAACCACACAGTCTCTGTTATCAGTGGTATGTT
A_55_P2376467	-0.698952	1.62333	down	4930502C17Rik	Mus musculus adult male testis cDNA, RIKEN full-length enriched library, clone:4930502C17 product:unclassifiable, full insert sequence. [AK015676]	CAAAGGTGCCATTTGGATCCAATGGAATGATTTTAGTGCTGGAATAAAAAGCATGCATAT
A_30_P01020352	-0.698934	1.6233	down		lincRNA:chr17:32213375-32238425 forward strand	GAGCTGGTGATGACCACAGTGTCGGGACCCATACAGTGCAGCAAGTCCATCACCTGCCAG
A_30_P01028244	-0.698916	1.62328	down		lincRNA:chr19:59498190-59531390 forward strand	AGATGGGCACAATAGACTGGAATGAAAAGCTAATATTGAACCAATGTGGTCCCTGCTCGC
A_55_P2113837	0.698751	1.6231	up	Tbc1d1	Mus musculus TBC1 domain family, member 1 (Tbc1d1), mRNA [NM_019636]	GGAGGGTGACAGTGGACAGCTTCTTTCCACATTGTATTTTATTATTTGAATGTTTTAATG
A_30_P01030028	-0.698477	1.62279	down		lincRNA:chr6:12062275-12075800 reverse strand	TATGAGAAGAGGAAAATTCCCTAGTGTAAAACCACACAATCAAAGAGGAGTGTACAAATT
A_55_P1984985	-0.698188	1.62247	down	Trim28	Mus musculus adult male testis cDNA, RIKEN full-length enriched library, clone:1700129A22 product:unclassifiable, full insert sequence. [AK131807]	TGTGTGTGTTAGGAGAACTGAACATTTAACGCTAAGGAATTAAAGTTGGATCTGATTGAT
A_55_P2018017	0.698107	1.62237	up	Tnfsf10	Mus musculus tumor necrosis factor (ligand) superfamily, member 10 (Tnfsf10), mRNA [NM_009425]	GGGAAATGTTAAACTTTGTAAACTCTGAAACGCACAAAGTGTTGCTTTGAATTTCACCTT
A_52_P330488	-0.697777	1.622	down	Otx1	Mus musculus orthodenticle homolog 1 (Drosophila) (Otx1), mRNA [NM_011023]	GTATATCAACCGTTTGGAGTGTGTCCATACATACACACTCCTAATCAAACCCTCCACTGT
A_55_P1974690	-0.697548	1.62175	down	2014-03-11	membrane-associated ring finger (C3HC4) 11 [Source:MGI Symbol;Acc:MGI:3608327] [ENSMUST00000126304]	AGTTGAAAAGGGGAAACTAACGAGAGGTATGGCCACACAGAAGTCAGTCACAGACCTTTT
A_55_P1970494	-0.697451	1.62164	down			GAGGAGAAAAAGAAAGCAAACAGCACAGTGTCCAAGTGTCCAGACAGGAATAGAGATTAG
A_30_P01024518	-0.697302	1.62147	down		lincRNA:chr3:45163252-45179177 reverse strand	AAAGCAAACTGCTGAGCAGACAGAGACCTCTAGAGGTACAGTAAGATTCATCTGAATCGC
A_30_P01020728	-0.697216	1.62137	down		lincRNA:chrX:100626855-100680296 forward strand	ACATAGGACATATTAGGGAAAAAAGACCCAAGGAAGGGCTCTTCACAGCTAAGAGCACCT
A_51_P363338	0.696732	1.62083	up	Prkd1	Mus musculus protein kinase D1 (Prkd1), mRNA [NM_008858]	TGTGTGACCAACTGTGTTGTATTAACAAAAGTTCCCGGAAACACTAAACTTGTTATTGTG
A_55_P2087533	-0.69668	1.62077	down	Gm10498	Mus musculus adult male epididymis cDNA, RIKEN full-length enriched library, clone:9230114N20 product:hypothetical protein, full insert sequence. [AK136747]	CCTCACTGGCCCAATTCACAAGATAACCCAAGAGCAGAGTATAACAAAACATACTTTTAA
A_52_P652336	-0.696466	1.62053	down	Lhx1	LIM homeobox protein 1 [Source:MGI Symbol;Acc:MGI:99783] [ENSMUST00000018842]	TATGTAAAAAGGTGTTGTTTACACGAGGCAAAGGAAAAACCATGATATTCAGACAGTTGC
A_55_P2171563	0.6963	1.62034	up	Mkrn3	Mus musculus makorin, ring finger protein, 3 (Mkrn3), mRNA [NM_011746]	GATGACCGTTGGCTCTTGCTTCAGTACCAGCTGGAAGAATATTTCAGTTTGAATCTGTAG
A_30_P01020529	-0.696075	1.62009	down		lincRNA:chr1:64686823-64728598 forward strand	GAAAGATCAGGATGACACTCAGAAACACATCCCTTTATCTTCTTTTACAAGAAGGCCAGA
A_52_P460704	-0.695851	1.61984	down	A830018L16Rik	Mus musculus RIKEN cDNA A830018L16 gene (A830018L16Rik), transcript variant 2, mRNA [NM_177173]	AAGAAACAATTGTTAAAGACTCGACCATAGCTAAGGAATAAACAAGCAGTTTCTGACTTC
A_30_P01019405	-0.695218	1.61913	down		lincRNA:chrX:20381171-20381562 forward strand	CTCAGTGAGAAAAGAATGTGTATTTCAACATGGGGGAACAGAGCCAAGAAAAGTCAGAAA
A_51_P482322	-0.695121	1.61902	down	Vmn1r210	Mus musculus vomeronasal 1 receptor 210 (Vmn1r210), mRNA [NM_134235]	TTCCCTAATTATAAGCATCTCTTCAAGGGACAATAACCTGATGCTAAATACTCGAGAATT
A_30_P01025966	-0.695111	1.61901	down		lincRNA:chr4:146017200-146029700 forward strand	TGGAGACTGAAGCTCACTGGATTTGGAACATTAACTATTTGTGGAAGAGCATCGTAAGAT
A_55_P2054673	0.695087	1.61898	up	Gpld1	Mus musculus glycosylphosphatidylinositol specific phospholipase D1 (Gpld1), mRNA [NM_008156]	ATCAGCTCCCCTTTCGCACCAGGTGGAGGGAAGCAGAGAGGAATTGTGGCCACCTTTTAT
A_30_P01021190	-0.69493	1.61881	down		lincRNA:chr16:9249688-9275013 forward strand	GGTACCAATAGTGGGAAGAGAGCTGCTTACTTCAAAAGGAGTAAGGGAGCAAGAAATCCA
A_55_P2330535	-0.694832	1.6187	down	4930592I03Rik	Mus musculus RIKEN cDNA 4930592I03 gene (4930592I03Rik), long non-coding RNA [NR_033307]	TCCCAGAAATGTACTCATATGCCCCAAGTATATCTCCTTGGAATAAAATTACTTTAAAGC
A_30_P01017688	0.694815	1.61868	up		lincRNA:chr18:84303291-84303890 forward strand	CAGACATTTAGGTAGAAGAATTCAAGAGATCCAGTCACTCCCTCAAAAACAGCCTGGAGC
A_52_P11618	0.694674	1.61852	up	Dusp19	Mus musculus dual specificity phosphatase 19 (Dusp19), mRNA [NM_024438]	CCTTCTTTTCTCATATGCTTTCTGACCTGAGAACCTTTGAAGTGATGAACTTACTAAGTG
A_55_P2128934	-0.69434	1.61814	down	Ccdc152	Mus musculus coiled-coil domain containing 152 (Ccdc152), mRNA [NM_001166063]	AGGAAGAAAAGAGCAAAGAAATTGCAAGTCTGCAGAACACTATCCGAGACCTAGAGCAGC
A_30_P01033530	-0.694158	1.61794	down		lincRNA:chr9:32416123-32416560 reverse strand	GCTCAGGCCAGACTTGTGTATGGCCATATGATCCCACGGTGCCTTTTTCTCGGTCTTCTG
A_55_P2125907	-0.69408	1.61785	down	Gm21064	PREDICTED: Mus musculus uncharacterized LOC100861598, transcript variant 1 (LOC100861598), mRNA [XM_003688990]	CTTCAGGAATCCAACTTTGTCTGTGTTCTGAATCTAGTCAAACACAGATATAAGTATTTG
A_55_P2043122	-0.693575	1.61729	down	Arsg	Mus musculus arylsulfatase G (Arsg), transcript variant 1, mRNA [NM_028710]	GGGATTTCTTCCCAGCCCCTAAAACTTCTAAGAAACAAAATAAAAATGTAAACAACTCAC
A_55_P1993859	-0.692901	1.61653	down	Amelx	Mus musculus amelogenin, X-linked (Amelx), transcript variant 2, mRNA [NM_009666]	ATTCTTCCTGAGCTGCCTCTGGAAGCTTGGCCAGCGACAGACAAGACCAAGCGGGAAGAA
A_30_P01026540	0.692781	1.6164	up		lincRNA:chr1:23332602-23333197 forward strand	GTCTGCATGATACTCTTGAGCCAAAGTGAGCAATAAGTTGTAAAATGGAAAAGAACACTT
A_55_P2172742	0.692598	1.61619	up	Mfn2	Mus musculus 7 days embryo whole body cDNA, RIKEN full-length enriched library, clone:C430046A10 product:similar to HYPERTENSION RELATED PROTEIN 1 [Mus musculus], full insert sequence. [AK049583]	CTTTCATGTACACTAGGCACACTTGTGGTATGCAAACAAAACATTTATACATACAAACGT
A_30_P01020920	-0.692507	1.61609	down		lincRNA:chr6:140639450-140662200 reverse strand	GCAAGGGATATACTGCAGAGGTTAGGCCACATTCAAGATAAAATCAAATCAGACCCTGTG
A_52_P62121	-0.692408	1.61598	down	Gpr37	Mus musculus G protein-coupled receptor 37 (Gpr37), mRNA [NM_010338]	AGGAACGGCTTGGTTAGCTCTGATTTCTTCGATTTTCATATTCTGTGAAAATTTTTACTC
A_55_P2037657	0.692372	1.61594	up	Gm10427	Mus musculus adult retina cDNA, RIKEN full-length enriched library, clone:A930010N13 product:hypothetical protein, full insert sequence. [AK149283]	TTTGCTTTCTTTCCTTTTAGTCACTCCTGCTTCCTGCTTGAGTGGCTGGATTGTCTAGAG
A_30_P01026394	-0.692245	1.6158	down		lincRNA:chr17:13185488-13187031 reverse strand	TCTACTGTAACTGTATCCTTATAAATGATCTCAGGCAGGGCACCTACGCTGGGGATTAAC
A_30_P01026127	-0.692168	1.61571	down		lincRNA:chr16:90008636-90015586 reverse strand	CAGATAACACCCCTCCCTAATTGGGGTGTTTTCCTCATCTCTTGGGTTATAATATATACC
A_51_P189269	0.691221	1.61465	up	Mbnl2	Mus musculus muscleblind-like 2 (Mbnl2), transcript variant 1, mRNA [NM_175341]	AATTTGTGGAAAGGTATTGTATCTAACTTGTATCACCTTGATAGTTCTCATCTTTATGTA
A_55_P2152637	-0.690703	1.61407	down	Zic4	Mus musculus zinc finger protein of the cerebellum 4 (Zic4), mRNA [NM_009576]	AGACCCCTACACTCCACCAGTAGATAACTTTAGGAATAAGTTTTGCTATGAGGGACCCTC
A_30_P01022276	0.690681	1.61405	up		lincRNA:chr13:28947034-28949166 reverse strand	GGCTTGTCAGTGGTAGCTTCATCAAGCATTGAGGCACATAACTCTATCATTTAAGCTATA
A_30_P01017919	0.690624	1.61398	up		lincRNA:chr4:82156098-82196298 reverse strand	CAGGAAGTGTGGCGGTGCAGAAATACTTTTAAACAGTATCAGACTACGTCGGATTGCTTA
A_55_P2172106	0.690614	1.61397	up	Icosl	Mus musculus B7-like protein GL50-B (Icosl) mRNA, complete cds, alternatively spliced. [AF394451]	GACTATTTGATTCCAAGATATTTGATGTCTCCATGCCTCAAAACACGTGGTTTACCATAA
A_55_P2111483	-0.69058	1.61393	down	Polq	polymerase (DNA directed), theta [Source:MGI Symbol;Acc:MGI:2155399] [ENSMUST00000182163]	GGCAGAGGTAATGTCAGAAACTTCATGTTTATGTGTTGTTTTGTGTGTATGTTTTTTGTC
A_30_P01032682	-0.690293	1.61361	down		lincRNA:chr11:117792051-117811334 reverse strand	AGCCGCCCGGCCTCTGCGCGCTCGGGAGCGCGTTTCCAGTAAGCGCGAGCCAGCCAGCGC
A_30_P01024176	-0.690035	1.61332	down		lincRNA:chr11:6421951-6429173 reverse strand	GCTCATCTTATCACTAATGATACCTGCTTTTACCACATGGTGAATTAGAACTTAAACTTC
A_52_P654703	0.689782	1.61304	up	Trim69	Mus musculus tripartite motif-containing 69 (Trim69), mRNA [NM_080510]	CTGCCTTAATGACGGTGGGGAGAATAAAGAACCGTTGCACATCGTACATCCACAGTAATT
A_55_P2067262	-0.689517	1.61274	down	Cdv3	Mus musculus carnitine deficiency-associated gene expressed in ventricle 3 (Cdv3), transcript variant 3, mRNA [NM_001134426]	AGCTAGACAACCAGTATGCTGTGCTTGAAAATCAGAAGTACAGCCACACACAGTACAGAT
A_51_P401501	-0.689329	1.61253	down	Tmem213	Mus musculus transmembrane protein 213 (Tmem213), mRNA [NM_029921]	CCAGAGGAGCCCAAAGACCTGGCGGCATGAGCCCAAGGATGGCTTTTTCTATCATTTGGG
A_55_P2049368	-0.689195	1.61238	down	Olfr1097	Mus musculus olfactory receptor 1097 (Olfr1097), mRNA [NM_146843]	CAAAGAAGTGAAAAGTGCTGTTGTTAGAGTTATGAAGAAGAGAGAGTGCACCCAGAAACT
A_30_P01029888	0.688952	1.61211	up		lincRNA:chr4:88604248-88645948 reverse strand	TTTTACTGGGCTATATGTTCCCCAAAGCTGTCAGCCTGTCTTGAATTCTTTGGCATGCCT
A_30_P01018919	-0.688802	1.61194	down		lincRNA:chr10:107854124-107888749 forward strand	AGCATTAGTAACTTCAGCTCAGATATGAAACAAACCATCTGCTTGAAGATGAACTTGCAA
A_30_P01031087	-0.688684	1.61181	down		lincRNA:chr3:4797557-4798821 forward strand	TTTATATGTAAACAAGAGCTAACCATGCAAAAGATTCATCCATCGGGACAATAGACTACG
A_30_P01031658	-0.688651	1.61178	down		lincRNA:chr2:157361470-157379813 reverse strand	ATGTGCATATGACCAAATGTGGGCAAAACTCAATTATTTACCTTTTAGAGAGCAACATGA
A_55_P2162472	-0.68809	1.61115	down		KxDL motif containing 1 [Source:MGI Symbol;Acc:MGI:1922870] [ENSMUST00000117580]	TGCCGTGTTTATTGGCTTGTGCACACGTCCGTCTCGCGCCCTCGACACCACCTCCTTCCT
A_55_P1961611	-0.68793	1.61097	down	Nebl	Mus musculus nebulette (Nebl), mRNA [NM_028757]	CTTGAACACACACCTACAAAGATAAACTGCACTTGCAATAATTTGCAAAAATCTGTACCC
A_30_P01020452	-0.687694	1.61071	down		lincRNA:chr14:25923295-25923893 forward strand	CTGAGATGAGACAGTGCTGTGAACATTCATGTATCACAATTGTCTGAATCATTACAATAT
A_30_P01020544	-0.687389	1.61037	down		lincRNA:chr1:87412059-87419385 forward strand	GTTTAGATACTGGATAAAGAAAGCTGGAAAACTAAACTGGCTGACAGAGTTATCAATAGT
A_55_P2164265	-0.687374	1.61035	down	Prl7c1	Mus musculus prolactin family 7, subfamily c, member 1 (Prl7c1), mRNA [NM_026206]	GATCTGGCATCCTTACAGGCAACTAACAAAGAACGTCAATTTTTTGCTCTTTATAAATTG
A_55_P2247021	-0.687268	1.61023	down	Izumo2	Mus musculus IZUMO family member 2 (Izumo2), mRNA [NM_029317]	GAAAAAGTGGCGACATCCTTCAAGAACCAAGCCCAGTATATAAAGGCTAACTCTAAGACA
A_51_P441933	-0.687123	1.61007	down	4931423N10Rik	Mus musculus RIKEN cDNA 4931423N10 gene (4931423N10Rik), mRNA [NM_027635]	CGAAGCCCATAGTTATCATGACTCCTGAAAGCATGAAGTTGGCTACCATGAACAGCTGAA
A_30_P01017612	-0.687107	1.61005	down		lincRNA:chr13:44217172-44224947 reverse strand	TGAACCTTCCCAGAGTTCCAGCAGACCAGCAGAAGGCAGTTTGGTGAGAGAGGCATTGTC
A_55_P2055612	-0.68699	1.60992	down	Zfp800	Mus musculus zinc finger protein 800 (Zfp800), mRNA [NM_001081678]	TGTACATGTTTATGTTGGAAAAATGTACTATATGTGATGAAATAAACCAGACTAAAAGTT
A_30_P01032914	-0.686716	1.60962	down		lincRNA:chr1:55298349-55308374 reverse strand	TTAAGTTTGACGACAATCCAGGTGGCTAAGCCTCCCAATAGCAACTTGTACACAGAAGCA
A_30_P01032059	-0.686123	1.60895	down		lincRNA:chr11:95644899-95658549 forward strand	ATATGCCAGCTTCCAGAAATCCTATAGAACAGACCCAGTTCGGTGCACAGGACTATAGTT
A_55_P2130834	-0.686032	1.60885	down			CATGAACTAGGCAAATAAACAATTGCTGCTCATCGCGCGCAACATTTTAACATAATAAAA
A_30_P01026569	-0.685879	1.60868	down		lincRNA:chr1:138520504-138521227 reverse strand	CCAGTATAGAATACCTAGAAACTTGAAAAGTTGTTCCTTATTCAGTTGGGGGAAATTAGA
A_52_P518434	-0.685619	1.60839	down	Hmbox1	Mus musculus homeobox containing 1 (Hmbox1), mRNA [NM_177338]	TCATGGAAAGTTACTTCAATGAGAACCAGTACCCAGATGAAGCAAAGAGAGAAGAAATTG
A_55_P2110377	-0.684749	1.60742	down	Olfr316	Mus musculus olfactory receptor 316 (Olfr316), mRNA [NM_001011818]	CGCCAGTGCCTGGAGCAGCAGCTCCATCACTGCATCAGTGCACACAGTGTATGTGTTTCA
A_30_P01022361	-0.684421	1.60706	down		lincRNA:chr17:86560289-86565864 forward strand	GATCCACACTTATCAGAGTCGCCAGATAAACACTTAGCTTTTCACCATCCGAACGAACAG
A_30_P01018692	0.684219	1.60683	up		lincRNA:chr11:18479852-18485704 reverse strand	GTGAATTTAGATATCAATACTTTGTATCAGTGAACTATTTTGCCTTCCCTTGGCCTTTTG
A_30_P01031571	-0.683898	1.60647	down		lincRNA:chr15:8463685-8494960 forward strand	CAGTTGCCTGTCTACACTAGAAGACCTGCATTTTTATTTAAAACTCACAAAATTCAGTCA
A_51_P267969	-0.68364	1.60619	down	Reg3a	Mus musculus regenerating islet-derived 3 alpha (Reg3a), mRNA [NM_011259]	CCCATGACAAGGGATGAAATACAAGAATTCACCCGGCAAGGCTGTACTTGCTTTACAGTT
A_66_P116865	-0.68344	1.60596	down	Rab38	Mus musculus RAB38, member of RAS oncogene family (Rab38), mRNA [NM_028238]	GATATATTATATATATTTTTCACAAGTGAAAAATAAAACATTAAAAATGCTGTTTCCCTG
A_51_P140690	0.683399	1.60592	up	Stmn3	Mus musculus stathmin-like 3 (Stmn3), mRNA [NM_009133]	CAGCGGCGACAAGAACGTTTTCGGGTTTTGTTTTTGTTTTCAATTCTGTCTAGATGCGAA
A_30_P01020656	-0.68305	1.60553	down		lincRNA:chr1:108657255-108667405 forward strand	GCTAACATCTAGCCTTTGGCCAAAGCTCATTTGAGCAAAACAAACCTCCAACACTTGGAG
A_30_P01029116	-0.682931	1.6054	down		lincRNA:chr6:121035524-121061074 reverse strand	ACGAGAGACTGCTGCATCATTAAAAAGAATGAAAGAAAGGAATCCCCAGGGGAAAGATGG
A_30_P01026981	-0.682619	1.60505	down		lincRNA:chr5:106351376-106352151 forward strand	GAGGTCATTGTCACTATTAAATGACAGATGTTTTCCTGAAAATCCCAGTATCCCTTCTGG
A_30_P01023839	-0.682515	1.60493	down		lincRNA:chr8:59994074-60002058 forward strand	ACCAACAAGCCAGTCAATTGCTTCTTGCCGATTCCGAGTCTTGAAAGGACAGTTAATATC
A_30_P01023315	-0.682444	1.60486	down		lincRNA:chr9:88333945-88342370 forward strand	CATCTAACAAAATGGGAAACATCAAGGTAGGTTATGAGAACAATTCTCAGTAGTTTTCTG
A_30_P01031448	-0.681917	1.60427	down		lincRNA:chr14:78924115-78938125 forward strand	GCCCGCCCCAGCCCGCGACGCCACCGCCGCCGCCTCCCCACGCCGCCCACTCACTCTCGC
A_55_P2070628	0.681871	1.60422	up			GGCTGTTTATATGTTGGGAATTGAACTCTTATTCTCTGGAAGAGCAGCCAGTGCTCTTAA
A_55_P2403159	-0.681826	1.60417	down	Fam26d	Mus musculus family with sequence similarity 26, member D (Fam26d), mRNA [NM_001081165]	AGCCAAGAGTTTTATAATTTCGTCTGTGCTGACTTACTAGTAAATGAATCATCCTCACCG
A_55_P2152165	-0.681793	1.60413	down			AAACATTCAGAGGAAATGGCCCCACAGCATTGGCTGAGTGTTTATGTCGACCAACTTAGT
A_30_P01028510	-0.681727	1.60406	down		lincRNA:chr8:59966759-59989059 reverse strand	GTCAGAACTATCAGAAACAAAAGACAAGTGAAACAGACTTAATAAATATAGTCTAAAAAA
A_30_P01022212	-0.681528	1.60384	down		lincRNA:chr8:71526892-71527500 reverse strand	ACTTCACCACACCACATCTAGATGTTCAGACCTTGGCTTAACTTTGGTATCTTGCAACTA
A_30_P01020828	0.681095	1.60336	up		lincRNA:chr4:133368314-133380210 reverse strand	AGAAGGTTCCCAGGGTGGCTGAGCATGGTTTAGAGCCACGCTTGCCTCTAAGCTAGGAAC
A_52_P580634	-0.680998	1.60325	down	Rbm46	Mus musculus RNA binding motif protein 46 (Rbm46), mRNA [NM_001277170]	GCACCACCAGAATATTATTTATATTCAACAACCAGTCAGGATGGGAAAGTACTCTTGGTG
A_30_P01017457	-0.680929	1.60317	down		lincRNA:chr18:5808025-5818625 forward strand	AAGGTTGTATTATCTCCCAAGCCTGCTGGATGCAGATACACAGAGCAACCAGAGCAAAAT
A_51_P273684	0.68069	1.60291	up	Gbe1	Mus musculus glucan (1,4-alpha-), branching enzyme 1 (Gbe1), mRNA [NM_028803]	TGTCCGTATACTGTTTCAGTAGACGCTGATATTTCACTCTTCTGAAGACTTGAAGTGGTC
A_30_P01027799	-0.680632	1.60284	down		lincRNA:chr1:193875525-193978800 forward strand	GGGTCAGCACAGTTAGGCAGCAAATACAAGAACACCTTAACAACCGGTTTACAACTGACA
A_30_P01030230	0.680557	1.60276	up		lincRNA:chr13:51248372-51259297 forward strand	TAAGTTGACTTCAGAGTTTGGTTTCTGCGCCAGAACTGTGGAAGCTGACTGAAGAGAAAG
A_55_P2197134	0.680432	1.60262	up	A930018M24Rik	Mus musculus adult male diencephalon cDNA, RIKEN full-length enriched library, clone:9330167E06 product:unclassifiable, full insert sequence. [AK034241]	TATTGGTAGTCATGTCAGTAAGTCCCAGATTAGCCAACACTACATCGTGAGATCCCGTCT
A_30_P01017646	0.68024	1.60241	up		lincRNA:chr6:129151512-129208737 reverse strand	AATGTGAAGGAAGGGGGCACATGGCTAGAGTTGTGGTAACGCCATTTAGAAAGGAGATTT
A_30_P01031264	-0.680208	1.60237	down		lincRNA:chr12:73838608-73862621 reverse strand	TTTCCGCCCCACCTGCCTGGGCCCCCCTCCCCCCGCCCCAGCCACCCGATCCCGAGCTGC
A_30_P01029464	-0.679808	1.60193	down		lincRNA:chr5:53931541-53945241 forward strand	TGTGGGGGTAAACAGCATTTAGGTTTAATTACACAAAGCCCCACGGTAGTTACCACTTTA
A_30_P01024462	-0.679463	1.60154	down		lincRNA:chrX:47893703-47996700 forward strand	AATACAGCAGACTAGCGTTCCTTACAACAATACAGCAGACTAGCGTTCCTTACGGCAGTA
A_66_P104217	-0.679281	1.60134	down	Clec2j	PREDICTED: Mus musculus C-type lectin domain family 2, member J (Clec2j), mRNA [XM_003945409]	CAGCAGTAGCAGAAACTACACAGAAAGGAAGTGGATTTGTAGCAAATCCAGTAACTACAC
A_55_P1984751	-0.679264	1.60132	down	Ppp1r14b	Mus musculus protein phosphatase 1, regulatory (inhibitor) subunit 14B, mRNA (cDNA clone MGC:99938 IMAGE:6820968), complete cds. [BC082545]	ACTCTGCGGCGCAGGCCCTTTAAAAATAAAACTAGGATACAGCCTCTGGAGCAGAAAAAA
A_55_P2129920	0.679248	1.6013	up	Chd7	Mus musculus chromodomain helicase DNA binding protein 7 (Chd7), mRNA [NM_001277149]	GTCCTACTGTTTACACTCACAGTTAATGTTCATACCTAGTTTTATAAGCTGTTCTGTAAC
A_30_P01029417	-0.679083	1.60112	down		lincRNA:chr4:132897264-132910714 reverse strand	ATTCTGGAACAGAAGAGGAAGAGGGGTCTTCAAGAAGCAGGCAAGCTTTCGTGCCATCAA
A_52_P556433	-0.678911	1.60093	down	Calb2	Mus musculus calbindin 2 (Calb2), mRNA [NM_007586]	AGATGAAGGAGTTCATGCAGAAGTATGATAAGAACTCAGATGGGAAAATTGAGATGGCGG
A_55_P2097368	0.678779	1.60078	up	Fam227a	Mus musculus family with sequence similarity 227, member A (Fam227a), mRNA [NM_029407]	TATGGATGTGGATAACAATTCCCTGGGCCTAAAAAGCCCCTACAGAATCAAGTCTCCTTC
A_55_P1979412	-0.678734	1.60073	down	Olfr615	Mus musculus olfactory receptor 615 (Olfr615), mRNA [NM_147080]	ATTGTGTATAGCCTGAAGACCAAGCAGATTCGCTCTGCCTTGAGAAAATCTTTGAAGATC
A_30_P01028462	-0.678607	1.60059	down		lincRNA:chr12:12876192-12918398 reverse strand	TAGTTATATTCTCCATTGAGTTTGTGAAGTCTGTTATGTCACACTGTGGGTCATGATTTA
A_55_P2024634	-0.678358	1.60032	down	Gm13546	Mus musculus predicted gene 13546 (Gm13546), transcript variant 1, long non-coding RNA [NR_045895]	TCTCAGCCTTCCAGCTTTACGATTTTTCTGTATCTCCCAGTAAAAATAATTCTTTGCTGC
A_30_P01032162	-0.677991	1.59991	down		lincRNA:chr16:29907604-29946602 reverse strand	TTTTAGAGTCTCTCTGTTGCAAATGGGTCCAGAAGTTTCCCATGTTGTTAAGAGGGGGTG
A_51_P184108	-0.677763	1.59966	down	4921530D09Rik	Mus musculus RIKEN cDNA 4921530D09 gene (4921530D09Rik), mRNA [NM_029859]	GATTATTGTGAGGGAAAGCTTATCTACCTGGCTGAGCGCATGCAAACGTTGTCCAGAAAT
A_30_P01030448	-0.67763	1.59951	down		lincRNA:chr2:83540813-83541273 reverse strand	TATGAGACATGCACAGTTGTGTAGGCAAAAAGGAAACAAAATCAAACAATGACATTGTCA
A_30_P01031136	-0.6776	1.59948	down		lincRNA:chr17:29183003-29217681 forward strand	TCATGGTTCACTGAACACCATGCATATTGTCTTATTTCCACCCAAGAGAATTGGGGGGAG
A_51_P383014	-0.676999	1.59881	down	Arhgap26	Rho GTPase activating protein 26 [Source:MGI Symbol;Acc:MGI:1918552] [ENSMUST00000115574]	GAATTACTAGTGCATAACTTTGGATGAGTATCATTGTCCTAAAAACTCACTGTATACCTG
A_51_P176202	-0.676655	1.59843	down	Ankrd36	Mus musculus adult male testis cDNA, RIKEN full-length enriched library, clone:1700008J08 product:hypothetical protein, full insert sequence. [AK005775]	GATGGTCACCTTCTCACTAAAATGGATCGGGTTGAAGGAAGGAGTGAAGCAGACCCCGGG
A_30_P01021849	-0.676577	1.59834	down		lincRNA:chr4:59264275-59287850 reverse strand	ATATCCATCGTCTCTCTGGGGAAGCTATCCTGTAGCCTGAGAGAGTCTGAAGCAAGCTGC
A_66_P114875	-0.676474	1.59823	down	1700008K24Rik	Mus musculus RIKEN cDNA 1700008K24 gene (1700008K24Rik), transcript variant 1, long non-coding RNA [NR_038141]	TTATAAAGGTCCTCGTACCACAGGATGTATGGGAGACCCAATAAAGACTTTGCAAAATGC
A_55_P2102738	-0.676391	1.59814	down		Mus musculus adult female vagina cDNA, RIKEN full-length enriched library, clone:9930032A20 product:unclassifiable, full insert sequence. [AK036976]	GGGTGAGTATGGGAGACTTTTGGTATAGCATTGGAAATGTAAATGAGCTAAATACATAAT
A_55_P2422204	-0.676351	1.59809	down	Prkag2os1	Mus musculus Prkag2 opposite strand transcript 1 (Prkag2os1), long non-coding RNA [NR_040684]	CGAAATCTATACTAAGCGGAATCCCCATGTTAAGATTCACCAATAAAAGCCTTTTAGAGT
A_55_P2078246	-0.675936	1.59763	down	Ppp1r10	Mus musculus protein phosphatase 1, regulatory subunit 10 (Ppp1r10), mRNA [NM_001163818]	TTCTCATGATGGCCCTGGAGGGAACATGGGTGGAAGTGGTGGACATCGTTCCCATGAAGG
A_55_P2095899	0.675646	1.59731	up	2310057B04Rik	PREDICTED: Mus musculus RIKEN cDNA 2310057B04 gene (2310057B04Rik), mRNA [XM_003945501]	GTGGCTAAGTGGCTTTCTGTACTTTGCACGTGCTTGAAATTATTGTTAATGAAATATTTG
A_55_P2141147	-0.675511	1.59716	down	4930577H14Rik	Mus musculus adult male testis cDNA, RIKEN full-length enriched library, clone:4930577H14 product:unclassifiable, full insert sequence. [AK019813]	GAAGACAACAACTTGAGCCCCTTGTTTTTCTTTGCAAAATGTCATCAAACTAAAATACAG
A_55_P1988795	0.675352	1.59699	up	Acss2	Mus musculus acyl-CoA synthetase short-chain family member 2 (Acss2), mRNA [NM_019811]	GATTGGCCCCATTGCCACACCAGACTACATCCAGAATGCACCTGGCTTGCCTAAAACACG
A_30_P01019378	-0.675229	1.59685	down		lincRNA:chr3:152810906-152815072 reverse strand	GGCCACACATGGTATAGCAACATTCAAACAAACAAAATTCTACTTCTTTTCTGTTTCTAC
A_30_P01026314	-0.675204	1.59682	down		lincRNA:chr13:59969950-59989725 reverse strand	GCCTTCAGAAAACATTAGCTGTTTCTGATACAATTCTCAATACAGTACAAAAGCACAAAC
A_55_P2068125	0.675188	1.5968	up	Myct1	Mus musculus myc target 1 (Myct1), mRNA [NM_026793]	TTTCCATCCCTTCCTGCAATGCCCACCACTTCCGGTGGAAACGGAGAGTCAGCTGATGAC
A_30_P01017455	0.675116	1.59673	up		lincRNA:chr8:110197171-110206546 forward strand	TTTAACTTCTACTGGTAGTGGCTAATGTTTGCTGGTACTTCCTGTGCTGAGTGCTGTGCT
A_55_P2301063	0.675059	1.59666	up	9930024M15Rik	Mus musculus adult female vagina cDNA, RIKEN full-length enriched library, clone:9930024M15 product:unclassifiable, full insert sequence. [AK036921]	GTCTCACCTGTAGTGAAAATGAATGAAAAACTCTCAGACTTTTATAAGCATCCTCAAGTT
A_30_P01029790	-0.674915	1.5965	down		lincRNA:chr16:30200995-30205965 reverse strand	CCCGCCCCAACAAGTATCTTTCTTACTAATCAATAATAACCATGTGAGTAAAAGGCTCAC
A_55_P2171773	0.674616	1.59617	up		Mus musculus adult male testis cDNA, RIKEN full-length enriched library, clone:4930584H23 product:unclassifiable, full insert sequence. [AK076976]	TTTAGAACACCCAGGGCTTGAAATCAGACAATGCCCTGGCTTCGATTTAAAAAGCCTTTT
A_55_P2186307	-0.674323	1.59585	down	Gm7489	PREDICTED: Mus musculus predicted gene 7489 (Gm7489), misc_RNA [XR_168537]	GGACCCAGGAGTTAGAATTTAAATGCTGGACTTTCTCCAGGTAATCAGCTTAAGAAAAAA
A_55_P2100535	-0.674007	1.5955	down			AAGCATCCCAAGGAAACAAAAGTGCGAGGCACAGTCACTTAGCAAGAAAACGCGAACTTA
A_55_P1992304	-0.673695	1.59515	down	1700025D23Rik	Mus musculus adult male testis cDNA, RIKEN full-length enriched library, clone:1700025D23 product:unclassifiable, full insert sequence. [AK006331]	CCAACATTTTGTTCTTTGCCCCAACTCAAATCTAAAGCTATTATCAGCATCTTAATCTTC
A_30_P01030478	-0.673493	1.59493	down		lincRNA:chr11:120079199-120130099 forward strand	ATGGAGAAACATTGTGGCCGATTTGGGAGGCAGAGAGAAAACAATTTCTGACTCTCTGAG
A_55_P2228715	0.673358	1.59478	up	5730422E09Rik	Mus musculus RIKEN cDNA 5730422E09 gene (5730422E09Rik), long non-coding RNA [NR_015478]	GTGTGCAGTCCCTTAGTTCGCTGTTTCTACTTCCCTTTTAAAGAAAAAATAAACAAACTT
A_55_P2423616	0.673042	1.59443	up	2900057C01Rik	Mus musculus cDNA clone IMAGE:40046733. [BC125023]	CCTGTTTGTCTATAAAGGCCACATTGCTCGTTTGTTTGTCTGTTTGTTTGTTTGTTTTAG
A_66_P100496	-0.672899	1.59427	down	Speer4b	Mus musculus spermatogenesis associated glutamate (E)-rich protein 4b (Speer4b), mRNA [NM_028561]	GGCCAGAGCCATGTGCCTCAGTTTACTTGCAATAGACCATCAGTGATTGAGGAGAGCAAT
A_30_P01018774	0.672755	1.59411	up		lincRNA:chr2:31001736-31006911 reverse strand	ATTGTGTTTCATGATTTACCGAGTCTTTGCAGACGTCTGGAGAACTCAGCAATAGGGTAT
A_55_P2109882	-0.672657	1.59401	down		Q7ZY31_XENLA (Q7ZY31) Spr-prov protein, partial (6%) [TC1780610]	CAAAAACATCACACTGGAATTCAGCATCCTGACTGCAGATTTTACAACTCACACGAGAGG
A_52_P1164643	-0.672222	1.59353	down		Mus musculus 12 days embryo eyeball cDNA, RIKEN full-length enriched library, clone:D230007F04 product:unclassifiable, full insert sequence. [AK084195]	AGTTGAGAGACGACAACTTTAAAGGTAAATAAATTCAGTTTATTAGACCTTTCGTTATTT
A_55_P1999022	0.672165	1.59346	up	Zfp760	Mus musculus zinc finger protein 760 (Zfp760), mRNA [NM_001008501]	CTCACACCTTGGCTTTCTTTGAAAATGGTCAATAGTAACTGTAGGTTTCCATATTTTAGT
A_55_P2081790	-0.672104	1.5934	down	Slc44a1	Mus musculus solute carrier family 44, member 1 (Slc44a1), transcript variant 2, mRNA [NM_001159633]	TTGAAAGCCTGGAGCAGAGCCAGAAAACTGAAGCATGCAAGGGGCAGTTGGGGCATCTCA
A_65_P20683	-0.671939	1.59321	down	Gm1070	PREDICTED: Mus musculus predicted gene 1070 (Gm1070), misc_RNA [XR_105056]	CCTGCTCGGTGCTCTGGATCTGACAGTTGTAGCATTTGAATCTCAAGTATACAAAGTGCA
A_55_P2142420	-0.671819	1.59308	down		UI-M-BH3-awj-e-05-0-UI.s1 NIH_BMAP_M_S4 Mus musculus cDNA clone UI-M-BH3-awj-e-05-0-UI 3'. [BE946235]	TGTCAAAAGCAATTCACTATTAACCAAGGAATTCATACAAATGAGAAGCCCTACAAGTGT
A_55_P2049687	-0.671579	1.59282	down	Efna2	Mus musculus ephrin A2 (Efna2), mRNA [NM_007909]	GGGGGGAGTGGGGTGGACTTTTTAGGATAGAAGCAACACTTTGCAATAAACTCATTTTTT
A_51_P191669	0.671493	1.59272	up	Chgb	Mus musculus chromogranin B (Chgb), mRNA [NM_007694]	TAGCGTGACTTGTAGCGTATTCTTCCTGCAAAATAGATGTTTCACGTGTCTGTGACAATG
A_55_P2100705	-0.671006	1.59218	down	Auh	AU RNA binding protein/enoyl-coenzyme A hydratase [Source:MGI Symbol;Acc:MGI:1338011] [ENSMUST00000120535]	GGTGGGCAAGATCTAGGAATTGATGGGCAGGAAAACATAATCAAAATGTATTGTGTGAAA
A_55_P1995617	-0.670905	1.59207	down	Kir3dl1	Mus musculus killer cell immunoglobulin-like receptor, three domains, long cytoplasmic tail, 1 (Kir3dl1), mRNA [NM_177749]	GATGCAGTGAAATAACAGCTGGAATATGAAGGCATAAGTTTTAAATTTGGGGTTATCCTT
A_52_P23379	-0.670822	1.59198	down	Depdc7	Mus musculus DEP domain containing 7 (Depdc7), mRNA [NM_144804]	ATTGATGAAAGTGAGTATTCTAGCAGTACAAAGAAGAAAACCAAAGATCAACTGTTGAGC
A_55_P1961410	-0.670737	1.59189	down	Defa3	Mus musculus defensin, alpha, 3 (Defa3), mRNA [NM_007850]	AAGAGAACGCATGAATGGGACTTGCAGAAAGGGTCATTTAATGTACACACTCTGCTGTCG
A_51_P321930	-0.670551	1.59168	down	Plekhd1os	Mus musculus Plekhd1 opposite strand transcript (Plekhd1os), long non-coding RNA [NR_037995]	AGCATTGCTGGAGGTAAAATGGGGTCCATAGACCACAGGACAGCACCAAGCCTGCAAGCT
A_66_P105735	-0.670435	1.59155	down		predicted gene 9964 [Source:MGI Symbol;Acc:MGI:3642605] [ENSMUST00000068448]	GGTAGCAGGTGACATGTGGGGTGGTTTTATACTCAGGGTGAGTGTAAATAAAGAGACTTA
A_30_P01029281	0.670268	1.59137	up		lincRNA:chr17:88469443-88470068 forward strand	TGTCTTTTCTTGGAAATGCACCATCTCTAATGAGCTTCCTGAATACCCCAAGTAGGCCTG
A_55_P2154724	0.66942	1.59043	up	Mettl4	Mus musculus methyltransferase like 4 (Mettl4), mRNA [NM_176917]	GTCAGTGTGCTTAGACATATGAACTTTTACACCATTCAGTGTACCCAGAAGTATAAATTT
A_66_P105460	-0.669111	1.59009	down	Ccdc14	Mus musculus coiled-coil domain containing 14 (Ccdc14), mRNA [NM_172824]	AAATTCTTTTAAAAACCAACAGTTGCTGAGAGAAGAAAGTTGTAGATGAGCAAGTACTGT
A_30_P01025660	0.668828	1.58978	up		lincRNA:chr1:107866276-107887102 reverse strand	CAGCAACTCTGCTTCCTCTTGATTGTGTATAAATCTCATCTCTTCCAAGCTATCTACTTT
A_30_P01023830	0.668755	1.5897	up		lincRNA:chr15:68161768-68193518 reverse strand	GTCCCAGTCTTCAAGCATCATGCTATCATTTAGTGAAGTTTGTTTAAAATGTACTTAGGA
A_55_P2082974	-0.668589	1.58952	down	Irak2	Mus musculus interleukin-1 receptor-associated kinase 2 (Irak2), transcript variant 1, mRNA [NM_172161]	AAGCCAAAAGGAGACTGATGGAGAACATCGTACTCTACAAAGAAGAGAGACTGGACAGCA
A_55_P2109544	-0.667941	1.5888	down	Trnt1	Mus musculus tRNA nucleotidyl transferase, CCA-adding, 1 (Trnt1), transcript variant 1, mRNA [NM_001242358]	ACTACTAAGTTACATAAAGAAGACCTAAAGATGAGCCCTGTATGAAACAGGGGAAGTCTT
A_30_P01027307	-0.667927	1.58879	down		lincRNA:chr4:33369310-33369871 reverse strand	TGGAAAGCACCTCACAGAGGCTAAAAGCCTAGTCATACTGGAACCATGGGATTTCCCATT
A_55_P2274996	-0.667484	1.5883	down	9530047P18Rik	Mus musculus adult male urinary bladder cDNA, RIKEN full-length enriched library, clone:9530047P18 product:unclassifiable, full insert sequence. [AK020597]	GACAGCCTTGGCTACATCATGAGATCCTGTCTTAAAATAAAATTTCTTTTCTTTTTGGTC
A_52_P237997	-0.667175	1.58796	down	Negr1	Mus musculus neuronal growth regulator 1 (Negr1), transcript variant 2, mRNA [NM_177274]	GTGGAGCTTCCATATCCAAAATCGTGCAACTGGGATTTTTCTACAGACACACAAGTTAGC
A_55_P2148185	0.66708	1.58786	up			TTCAGTCTGTGCACTCTTGAGACTGAAGGAGATTTCCTTGTGTGGCTATCTACCTCTGAT
A_30_P01021099	-0.667047	1.58782	down		lincRNA:chr13:81773237-81783062 forward strand	ACAAGTCATAACAGCATCAGAAGACATCTTCTGCAAGATCCAAACAGTAAATATTTCAGT
A_52_P339742	-0.666907	1.58767	down	Cyb5r3	Mus musculus cytochrome b5 reductase 3 (Cyb5r3), mRNA [NM_029787]	CTATTGGCCAACACATCTACCTCTCGACTAGGATCGATGGCAACTTGGTCATTCGGCCCT
A_52_P160554	-0.666646	1.58738	down		Mus musculus (clone 1E12) IgH chain mRNA, VJ1 region. [M32395]	AAGCTCCAGGGAAGGGACTGGAGTGGATTGCTGCAAGCAGAAACAAAGCTAATGATTATA
A_55_P2085955	-0.666282	1.58698	down	Dnajb11	Mus musculus DnaJ (Hsp40) homolog, subfamily B, member 11 (Dnajb11), transcript variant 1, mRNA [NM_026400]	GCTACAAGGGAGGTTAAAGGTTAAAGCGTTTGTAAGAACCATCTTTAAAAATAAGGTTTG
A_30_P01033046	-0.666065	1.58674	down		lincRNA:chr6:125330524-125410249 reverse strand	AACCCTACACTGCAGGTGTGGTGCTTGACGCCTGCAGAAGGGGATATTGGTAGCCAGAGA
A_55_P2282869	-0.665937	1.5866	down	4930447N08Rik	Mus musculus RIKEN cDNA 4930447N08 gene (4930447N08Rik), long non-coding RNA [NR_045168]	TAACGCACATGCTCATCTTGTATCAGCTACAGACAATGAGCAATAAAGTCAGTCTTTATC
A_55_P1967837	0.665885	1.58654	up	Tmem198	Mus musculus transmembrane protein 198 (Tmem198), mRNA [NM_177056]	ATCTTCCAATCATTCATCTAAGGGTTCTTGTCACTGTCCATGGAACTAATGACGGCACCC
A_55_P2124570	-0.665615	1.58624	down			ATTTTATACTTTCTATGAACACATGAGCTATGACGCACAGAGCGGCATCCACAGGGGAGA
A_30_P01023441	0.6654	1.58601	up		lincRNA:chr17:88993214-89025839 reverse strand	TCTAAGAGCATTCTCAATTGATTACTCTTTGGGGGCGTGACCATGGCCTCTCTGATTACA
A_30_P01032774	-0.665247	1.58584	down		lincRNA:chr5:92548501-92566401 reverse strand	ATGTTATGAAATAATAACATCAGTACATGACAGAAGTAAAATACGATACTAGGAGAGGAA
A_52_P1027170	-0.664993	1.58556	down	Hsf5	Mus musculus heat shock transcription factor family member 5 (Hsf5), mRNA [NM_001045527]	AGCATATTCGCGTTTCAGCACCTTAAGCACCGATCAGTTTCAGTCAGTCAACAATAAAAT
A_55_P2113912	-0.664824	1.58537	down			TGGCAAAGGCTGACAAGGCTCGTTATGAAAGAGAAATGAAAACCTACATCATCATCCCCC
A_30_P01032306	-0.664821	1.58537	down		lincRNA:chr13:27124478-27124684 forward strand	ATTTTAAGGAAACGAGAGCACCTGAAAAGGGAGGCTAACATGAGCTCACACAGCTTTTGG
A_55_P2048134	-0.664717	1.58526	down	Fgf16	Mus musculus fibroblast growth factor 16 (Fgf16), mRNA [NM_030614]	CAATAGCATTAAGGAAAGCAAAACATTGTTTATGTTGAGCTATGGAAAAGAGACACTGTC
A_55_P2131667	-0.664631	1.58516	down	Vstm2b	Mus musculus adult male diencephalon cDNA, RIKEN full-length enriched library, clone:9330151I22 product:RIKEN cDNA 2900093B09 gene, full insert sequence. [AK020370]	ATAAACTGTATTGTATATTGCTGAACAATAGTTGTATTAAAAAGAAAACCTTTTAAATAG
A_30_P01020785	-0.66463	1.58516	down		lincRNA:chr4:129497990-129515290 reverse strand	AAAGTTTACGCTTCCGAATACTTTACCGGCTAAAACTCAGACTCCGGGACAAGAGTCAAG
A_55_P2100103	0.664589	1.58512	up	Htr7	Mus musculus 5-hydroxytryptamine (serotonin) receptor 7 (Htr7), mRNA [NM_008315]	GTGTACAAATTCCTGAGCTGCAGATTCGCTAGAGTGAACGTATATACTTATATTCATAAT
A_52_P346225	-0.664523	1.58504	down	Asz1	Mus musculus ankyrin repeat, SAM and basic leucine zipper domain containing 1 (Asz1), mRNA [NM_023729]	ACCTGAAGTGACAAAGTTGGAAATCAGTGGTGATGAGTTCCTCAACTTTCTTTTGAAATT
A_55_P2180854	-0.664053	1.58453	down	Mrgprg	Mus musculus MAS-related GPR, member G (Mrgprg), mRNA [NM_203492]	GAGAGAAGAGAGAGCTAAGCTTCCAAAGTACACATTATTTTGTACATGTTATGATGTTTC
A_55_P1959328	-0.663906	1.58437	down	Olfr198	Mus musculus olfactory receptor 198 (Olfr198), mRNA [NM_001011808]	TTTATATACAGTCTGAGGAACAAAGAGGTAACAGCTGCTCTGCGAAGAAAAATGAAATAA
A_55_P2020398	-0.663703	1.58414	down	Gm8765	Mus musculus predicted gene 8765 (Gm8765), mRNA [NM_001244649]	TGAGATGCATAACTATTCTTTGACATATAGAAGAATGGGAGACAAATTGCAGTTAGGGAT
A_52_P313068	0.663703	1.58414	up	8030462N17Rik	Mus musculus RIKEN cDNA 8030462N17 gene (8030462N17Rik), mRNA [NM_178670]	AGCAGAGGAATTTTGTGGCATCACTTACTACCTTTTTTCCTATAATGTTGTAGTTACTAG
A_55_P2148931	-0.663265	1.58366	down	A730017C20Rik	Mus musculus RIKEN cDNA A730017C20 gene (A730017C20Rik), transcript variant 2, mRNA [NM_001167925]	CTAAAATGCCTTCTAAGTACTTGCAAGAGAATCTGTCTGTGCATTGTGAACGTCCGCATT
A_30_P01024914	-0.663084	1.58346	down		lincRNA:chr5:120269342-120279542 forward strand	TGAAAATTCAAGGAAGAGCTCAACCAGAATATTCCTTTAATGTTTTCTCTGTCACATCCA
A_30_P01031720	-0.662905	1.58327	down		lincRNA:chr12:73789535-73799787 reverse strand	AAGAAATACAAATGTGGGAGGCAATGTAGATGTCCTCAGGTTTGAGTTCAGGTCTCTGGG
A_55_P2097067	-0.662687	1.58303	down	Adam32	Mus musculus a disintegrin and metallopeptidase domain 32 (Adam32), mRNA [NM_153397]	AGAATCGAGATTTCTTAGGGATCAATCAAAAACGTGTTCATCCAAGTGCCACGGGAACGG
A_30_P01031047	-0.662641	1.58298	down		lincRNA:chr13:78341864-78375825 reverse strand	ACTTCTTCACTCTAGGGGTCAATCTAAGTCCCAGAGGCCTTTTTGCAAGTTTGGAAGCTT
A_55_P2044292	0.662515	1.58284	up			TTGACTGTTTGTTGATGAAGGAAAACCCAGCTCACTATGAGTGATGCCATCCTTGGGTAG
A_55_P1997046	-0.662319	1.58262	down	Slc6a18	Mus musculus solute carrier family 6 (neurotransmitter transporter), member 18 (Slc6a18), transcript variant 1, mRNA [NM_001040692]	AGGGAGTGAGTCTGGTACCTCACTCAGGATGATAGCATTTCCTTCAGATACATCCATTTG
A_30_P01019506	0.662314	1.58262	up		lincRNA:chr3:93150619-93184368 forward strand	TTATCTGTGATCTCTCAAAGGAGGTGGTGTGGGCAGCAAAAGGTTTTGAACAGGACTTGT
A_30_P01022997	0.661949	1.58222	up		lincRNA:chr19:53517903-53540753 forward strand	ACTCACTCAAATTTTTGGTTCATTGGCTTGCCTGTGGAAGGTGGCTTCCATCACTCAACT
A_55_P2129955	-0.661724	1.58197	down	Olfr1313	Mus musculus olfactory receptor 1313 (Olfr1313), mRNA [NM_207150]	ATGAAGATGGCAATGAGGAGAGTATTCAGACATCTAATGGGCTATAGACAAATCTCTTGA
A_66_P109519	-0.661668	1.58191	down	Ehf	Mus musculus ets homologous factor (Ehf), mRNA [NM_007914]	GGATTCTGATCAATGAAGAACCGGACGTAAATATCTCAAAGACTACTTTTCTGTGATATT
A_55_P2092730	0.661489	1.58171	up	Wdfy1	Mus musculus WD repeat and FYVE domain containing 1 (Wdfy1), transcript variant 1, mRNA [NM_001111279]	GAGACGCTGCAAATTTTTGTTCTTTCTACTTGTGGGTTCCATTTTTGTGGGCTTTTTTAT
A_55_P2068315	0.661222	1.58142	up	Gm17019	Mus musculus predicted gene 17019 (Gm17019), mRNA [NM_182957]	TTTACTAGGAAGCCATGGCTGATCCAGTGCGTTGTTCCCTTTTCTCTTCAGACATAGTCT
A_51_P370755	-0.661018	1.5812	down	Polh	Mus musculus polymerase (DNA directed), eta (RAD 30 related) (Polh), mRNA [NM_030715]	AATATGACATTTCTAATACAAAGTTAGGGGTTTTTTCTTCCAATGGGACTCTGATCCTGT
A_55_P1975230	-0.660966	1.58114	down			ACCAATCCAGCCTCCAGTGAGTGACCGTTTTCTGGGACGCGAGACTCCTCTTAACGCTCA
A_55_P2230506	-0.66082	1.58098	down	4931402H11Rik	Mus musculus adult male testis cDNA, RIKEN full-length enriched library, clone:4931402H11 product:unclassifiable, full insert sequence. [AK016424]	AGCTGTTTTAAAACGACTAAAGCTGGGTGGTCGCTCCCTCCTCGCCTCCTCTCCTCTCAG
A_55_P1976834	-0.660568	1.58071	down	Olfr1361	Mus musculus olfactory receptor 1361 (Olfr1361), mRNA [NM_146541]	TCTACACTCTGAGAAACAAAGATGTCAAAGAGGCCGTAAAGAAAGTGCTAGGGAAGGGGA
A_30_P01033599	-0.66052	1.58065	down		lincRNA:chr1:138570107-138632310 forward strand	GGTCAGATGAGGTACCAGATCTGAAAGGCATTACTGTTGTAGATTACTGTAAAAATATAA
A_55_P2150496	-0.660465	1.58059	down	Dync1i1	Mus musculus dynein cytoplasmic 1 intermediate chain 1 (Dync1i1), transcript variant 1, mRNA [NM_010063]	GTGCTGCATGGAACATATTTATTTGAAAGCATTAAAATAAACGATCTTAGAGCATGTGCG
A_55_P2094484	-0.660436	1.58056	down	Gm14137	Mus musculus predicted gene 14137 (Gm14137), mRNA [NM_001039223]	TGTGTGTGTGCACACAAACAAGTATATACAGGTACATGCAGAGGGCAAAGGTGTTGGATG
A_51_P214423	0.659937	1.58001	up	Tead1	Mus musculus TEA domain family member 1 (Tead1), transcript variant 1, mRNA [NM_001166584]	TTCAAAAGGCATTTGGCTAAACCTCCCGGCAGTACAGTATTCTCGTACTCATTAACGTTT
A_30_P01028498	-0.659806	1.57987	down		lincRNA:chr2:112014068-112049540 forward strand	TTGAATTTCACATTCTTAGCAGAACAGTTGCCTGAGCACACACATTATAGGACATCCATT
A_66_P100284	-0.659658	1.57971	down	A430060F13Rik	Mus musculus 0 day neonate thymus cDNA, RIKEN full-length enriched library, clone:A430060F13 product:hypothetical protein, full insert sequence. [AK079763]	GTTGGCCTAAAACCCAAGGCAGCCACTAATTCTATTTAAACTTCACAGATAAGCTTATTT
A_30_P01021340	-0.65937	1.57939	down		lincRNA:chr6:36765550-36793825 reverse strand	AACTTCAACTCATGACCATAGGCTAGTATTTCTATATTTCTATTTAAGAAGATTGCAGTC
A_66_P103662	-0.658808	1.57878	down	Wdr96	WD repeat domain 96 [Source:MGI Symbol;Acc:MGI:1289258] [ENSMUST00000026048]	AGCTAACAGGTAGATCATTTCCTGTGAAACCTTACACCTTGGCACTAAGTAAAATTGCAC
A_55_P1952725	-0.658643	1.5786	down			AATCTAGTGGACTGCTCTAGACCTCAAGGCAACAGGGGCTGTTATGTAGGTAATACATAC
A_30_P01024998	-0.658602	1.57855	down		lincRNA:chr13:5506700-5519000 forward strand	TAGAATGGCAGCTCCAATGGCAGGGAGAATTGGCAACACTATGGTCATGTTCAAGTTTGT
A_30_P01030735	-0.658506	1.57845	down		lincRNA:chr9:31834945-32015745 reverse strand	AAACGGCACTTTATATAAACAACAGGGCAATTTACTTGGTCACATTCTACCAGCAAGAAC
A_51_P197948	-0.658048	1.57795	down	Iws1	Mus musculus IWS1 homolog (S. cerevisiae) (Iws1), mRNA [NM_173441]	CAAACCTTTACAATTCTTGAACTATCTTTGTTATACTCTTAATTTGGCACATCGTAGGGC
A_55_P1984307	0.657501	1.57735	up	Gpr116	Mus musculus G protein-coupled receptor 116 (Gpr116), mRNA [NM_001081178]	ATATCAGTGTATTAGTGATGCTGTCTTTCCTCATAATAAAATACCTAATGATTTGCCCGG
A_55_P2043977	-0.657309	1.57714	down	Mtm1	Mus musculus X-linked myotubular myopathy gene 1 (Mtm1), transcript variant 5, mRNA [NM_001164193]	CAGCAGAAGAGATATGTTTGAGATCCTTGTAAAACATGCCTTTCCTCTGGCACACAATCT
A_55_P2042381	-0.657122	1.57693	down	Clrn3	Mus musculus clarin 3 (Clrn3), mRNA [NM_178669]	CCAGGCAAGCCTGGGAGACTTAGCAAGACACATGGGGATAAAAAGAAAAGTAAATAAATG
A_55_P2178834	-0.657006	1.57681	down	Ighm	M.domesticus IgM variable region. [Z22061]	TGGAATGGTTGGGAGGAATATGGTCTGGTGGAAGCATATACTATACTCCAGCTCTCAGTT
A_55_P1970454	-0.656981	1.57678	down		ubiquitin specific peptidase 35 [Source:MGI Symbol;Acc:MGI:2685339] [ENSMUST00000181354]	CTACAAAATATCTGGGCTTGTGTGTTGAGACATAGCAGACATCTTTTAAAAAGGATTTAC
A_55_P2018101	-0.656916	1.57671	down	Mettl7a1	Mus musculus methyltransferase like 7A1 (Mettl7a1), mRNA [NM_027334]	TATTTTAAATGTTGATCAATAAATTCATATTCATTTAATAAATGAAAATAAATGGTTTCT
A_55_P2056792	0.656784	1.57656	up	Cmtm2a	Mus musculus adult male testis cDNA, RIKEN full-length enriched library, clone:1700063K20 product:CHEMOKINE-LIKE FACTOR 2 VARIANT 2 homolog [Mus musculus], full insert sequence. [AK006874]	TTTGAAAGCAGAACGCACAGAAGACAAAGTGAAAAAGATGGAGCCCGTGTGCTCAGTGAA
A_55_P2119272	-0.656668	1.57644	down			TATACAAATCCTCAGAAATAAACAAGACTCAGGGTTGAACCCTGGGCCAATGATGGACAA
A_51_P418056	0.656394	1.57614	up	Sc5d	Mus musculus sterol-C5-desaturase (fungal ERG3, delta-5-desaturase) homolog (S. cerevisae) (Sc5d), mRNA [NM_172769]	GGCTGATGTAATAAGATTGTACTTCCTATACAGAGGCACCTTACTCTCTGGGGCATTATC
A_55_P2074668	-0.656202	1.57593	down	Olfr1336	Mus musculus olfactory receptor 1336 (Olfr1336), mRNA [NM_146915]	CTCAGGAACAGGGAGGTGCAATCAGCTTTCCACAGAACCATGCGCTGGTCTTCAGTTTGA
A_66_P131994	-0.656188	1.57591	down	Zfp934	Mus musculus zinc finger protein 934 (Zfp934), transcript variant 2, mRNA [NM_175252]	AATCTGTGTGATAAATCCTTTTCAAAACATAATCATCTTCAAAGTCATAGAAGAACACAT
A_55_P2049466	-0.655941	1.57564	down	LOC101055632	predicted gene, 21094 [Source:MGI Symbol;Acc:MGI:5434449] [ENSMUST00000177842]	ACCCAGCAATTGGTAAAGATGAAAATATATCGCCTCAAGTAAAAGGACATGAAGACAGGG
A_52_P586959	-0.655357	1.57501	down	A430090L17Rik	Mus musculus RIKEN cDNA A430090L17 gene (A430090L17Rik), long non-coding RNA [NR_045836]	GAACTGAAAGGAAGATTCATTCCAAAGAACTGATATGGAAAAGATATTCTCAAGCCAGAA
A_55_P2123854	-0.65535	1.575	down	Zfhx2	Mus musculus zinc finger homeobox 2 (Zfhx2), mRNA [NM_001039198]	CCAGAGGAATGAAGTAAAGAAAAACATAAACTTTGAATATACATAGAGAGAGAGAAAAAA
A_30_P01025997	-0.655252	1.57489	down		lincRNA:chr17:47006033-47023558 forward strand	AATGTTAGCATTAGTGGTAGGAAGATTGGCCTACCCTCTGATAAGAGAGGACTAGGTTCC
A_52_P439545	-0.655097	1.57472	down	4930447F04Rik	PREDICTED: Mus musculus RIKEN cDNA 4930447F04 gene (4930447F04Rik), misc_RNA [XR_141406]	GGTACAAAGGACAAGAATCAAGACAGAACAATCTCTAGGGTGTACAAAGAAAAAAGTTCC
A_30_P01024652	-0.654543	1.57412	down		lincRNA:chr3:108763862-108772151 forward strand	TTATTCCCAGCATGCCCAAGGCCTGAGTTTGATCGACTAGTAGCATAAAAGAAAAGATTC
A_55_P2025155	-0.654542	1.57412	down		Q9QWY6_SPAEH (Q9QWY6) High mobility group protein, partial (60%) [TC1781719]	GATATGGCAAAGGCTGATAAGGCTCGTTATAAAGGAGAAATGAAAACCTACATTCCCCCC
A_51_P358787	-0.654496	1.57407	down	Olfr48	Mus musculus olfactory receptor 48 (Olfr48), mRNA [NM_010990]	ATCTGCCTGTTAAACTTTCTACTTCTGATGATCTCTTATATAGTCATCCTCGATGCTCTA
A_55_P2057459	0.65442	1.57398	up	Mall	Mus musculus mal, T cell differentiation protein-like (Mall), mRNA [NM_145532]	ATCTTCACCATTGAGTATTTGCTGAATGACCTCGAGCAAATAAAAGATTGTTGGACAGTG
A_30_P01030813	-0.654384	1.57394	down		lincRNA:chr14:77042348-77042645 reverse strand	ATAACTTGCTACACATTGGCCAAGGACAACATGACCCAAGTGGGTAGTTTGTGAACTCCA
A_30_P01031354	-0.65415	1.57369	down		lincRNA:chr6:90745692-90777977 forward strand	AGGAAGAAAATGAAAGCCAAGGGCAGTCACTTTCCCAGGACTGGCAGGTTCATCTAGATA
A_55_P2002787	-0.654064	1.57359	down			AACCCAAGGATCCACATGGGAGGAGGACAGAACTGTGTCCCCAAAGTTGACAGGTGTACA
A_51_P200599	-0.653781	1.57329	down	1700008I05Rik	Mus musculus RIKEN cDNA 1700008I05 gene (1700008I05Rik), mRNA [NM_027952]	GCTGAAATCCTAAAAAACATCATCTCAACACAAAATGATGAAGACGAAGAAAAGCCAATC
A_55_P2361552	-0.653641	1.57313	down	4930432B10Rik	Mus musculus adult male testis cDNA, RIKEN full-length enriched library, clone:4930432B10 product:unclassifiable, full insert sequence. [AK015283]	CATTCTTCCTGTGGTAACTTACTCAGGAGTTTGTCATTATAACTTAAATACTCTGGATCT
A_30_P01030402	-0.653354	1.57282	down		lincRNA:chr14:27930334-27930974 forward strand	AAATAATCTCTGATTTGGATTACCTGGTGTCTATAATCAAAGAGAGGGGAAATGAAGTAG
A_30_P01027098	-0.653122	1.57257	down		lincRNA:chr4:119405156-119461821 forward strand	AGACTACCTGAAAATACAGGTAGCACACACAGTACACACGAGGTCACACTTCCAAATATG
A_52_P312806	-0.652886	1.57231	down	Umod	Mus musculus uromodulin (Umod), transcript variant 1, mRNA [NM_009470]	AAACAAGTTGGCATCTTTCAGTGCTGTTCTTCCTTCAAATGTGATATGTATGAAGCCCCT
A_30_P01031066	-0.652436	1.57182	down		lincRNA:chr5:119945358-119962612 reverse strand	TTCATCGGTTCCATCCGTGAAGTTCCCAGTGACGTCAATGGGCTTCCAGATGGGGACCAC
A_51_P206475	-0.652397	1.57178	down	Lce1i	Mus musculus late cornified envelope 1I (Lce1i), mRNA [NM_029667]	CTCCTGGGAAATGTTCTGCATTGTCCTCATGAAACGACAATGCCCATTTGCCTCTTTGTT
A_55_P1989081	-0.652304	1.57168	down			AACACGAAGAGTTAATGGAGCACACATCATCCTAAGACATGCCTTCTTGCAATCCCTGCT
A_66_P110742	-0.652275	1.57164	down		predicted gene 9949 [Source:MGI Symbol;Acc:MGI:3647947] [ENSMUST00000067743]	TCAAAGGGACTAAACATCAACAGCTTTCTCGATTGGCATTTTGCAAGAGAATTAAACCCC
A_55_P2178991	-0.651989	1.57133	down	9030404E10Rik	Mus musculus RIKEN cDNA 9030404E10 gene (9030404E10Rik), long non-coding RNA [NR_045878]	CAACGCAGGATCCATGCTGACGAAGAGCTAGACCCAAACCAAAAGGAGTGTGAATGGTCG
A_30_P01018192	-0.651944	1.57128	down		lincRNA:chr15:41486232-41499767 reverse strand	CACGGAAAGCTATGAGAAGACCAAGGAAGGGGAAGCAATGGAAAGCAGTCTCAACCAGCA
A_55_P1952920	-0.651713	1.57103	down	AI854703	Mus musculus expressed sequence AI854703 (AI854703), non-coding RNA [NR_027236]	TCCCAAAGGTCCCTGATATCTGTTGGAGGAGGTGACTCAAATAAATGTTCTCTACAACAG
A_55_P1954569	-0.651625	1.57094	down	Hmgcs1	Mus musculus 13 days embryo male testis cDNA, RIKEN full-length enriched library, clone:6030403N11 product:pre B-cell leukemia transcription factor 1, full insert sequence. [AK031297]	GTTGGTTACTCATTTGCTTAGTCTTCAAACATTTCCAAACCCAGTATAAATAACACACTC
A_55_P2206491	0.6511	1.57037	up	1810062O18Rik	Mus musculus RIKEN cDNA 1810062O18 gene (1810062O18Rik), long non-coding RNA [NR_033571]	CCACGAATAGTGACGGTGTTTACAGCATGTATATTTTCAATATCTCATGAATACTAACAG
A_55_P2132345	-0.650888	1.57013	down	Luzp1	Mus musculus leucine zipper protein 1 (Luzp1), mRNA [NM_024452]	AGACTTGAAATGTTCAGAAGACCCCCCGACTGGAATAGGTAGGAACATGGAAGCTACTAA
A_30_P01024787	-0.650419	1.56962	down		lincRNA:chr16:93121505-93142255 forward strand	GTGAGAAAACAGCAAACTTTCCGCTATCACACAAGCTAGTCTTTAAATACCTGATATTAA
A_30_P01026311	-0.650027	1.5692	down		lincRNA:chr7:49715933-49771497 forward strand	TGTGGACAACTCAGACATCGGTAAAGGGCACAGCATCTTGAAACATCTGTTTAGTGTCTA
A_55_P1992199	-0.649837	1.56899	down	Psg20	Mus musculus pregnancy-specific glycoprotein 20 (Psg20), mRNA [NM_054058]	CAAACCATAAGTAAACATGGAAAACTGGTATCAAATACATCCACATTTCTTCAGGTGTAC
A_55_P2017116	-0.649812	1.56896	down		predicted gene 8074 [Source:MGI Symbol;Acc:MGI:3643195] [ENSMUST00000095071]	AGAAAGCCTCCCATGGATGCTAAACAAATCAAAGAAGCAAGGAAGGCTTTCAAGGTTTAG
A_30_P01030047	-0.649679	1.56882	down		lincRNA:chr5:52584616-52595441 reverse strand	GGAAAATTCATAGCCCAAGTCCAGTAAAACCATTTCTGTATTGTTCATCATTCATATGCA
A_55_P2368435	-0.649568	1.5687	down	4930442G15Rik	Mus musculus adult male testis cDNA, RIKEN full-length enriched library, clone:4930442G15 product:unclassifiable, full insert sequence. [AK019609]	CTACCTGCCTTTGTAAGCATGAACAACAATAAACTTATCTGGATGGGATCTTGCCCACAA
A_55_P2021861	-0.649462	1.56858	down	Qrfp	Mus musculus pyroglutamylated RFamide peptide (Qrfp), mRNA [NM_183424]	GAAGGGGGAGGCCTTCAAAGGAACGCATCTGCTGTCATTACCTTTAATCATTAAAAGAAA
A_55_P2116246	-0.649343	1.56845	down	4931423N10Rik	Mus musculus RIKEN cDNA 4931423N10 gene (4931423N10Rik), mRNA [NM_027635]	TTGAAATGCAAGACCCTTTTACAACCAATGAAGCAAGCGTGGAGAAGACACAAACCCGCA
A_55_P2212733	0.649308	1.56842	up	C80012	H3045G09-5 NIA Mouse 15K cDNA Clone Set Mus musculus cDNA clone H3045G09 5', mRNA sequence [BG079846]	GAAGGATGTGGTCTGATTTCTTTGAATTGATTATTGGAGGCTGTCTTAGTCAGGGTTTCT
A_30_P01029085	-0.649281	1.56839	down		lincRNA:chr14:77258025-77278750 forward strand	GTTTATGGTTGGCCTAGAAATGAATCATTTATTTTAGGTCTGGGCCTTAAGGGGAAAAAA
A_66_P119877	-0.649188	1.56829	down	4930455H04Rik	Mus musculus RIKEN cDNA 4930455H04 gene (4930455H04Rik), long non-coding RNA [NR_040596]	TAAAGATGAGAATGGGTCAGGTGTATCAGTGAGGGAAGCAAAGCCATAGCCCTTACTTCC
A_52_P194971	0.648845	1.56791	up	Hoxb7	Mus musculus homeobox B7 (Hoxb7), mRNA [NM_010460]	GTTGCTAGTAAGGTCTTTGTAAAATCTTGCTGTTTTGTAAGCCCTCTTTGAAGCTGTCTT
A_55_P2165160	-0.648756	1.56782	down	Arhgef1	Mus musculus Rho guanine nucleotide exchange factor (GEF) 1 (Arhgef1), transcript variant 1, mRNA [NM_001130150]	CCTGGGACCAGGAGGCCCAGATATATGAGCTGGTGGCACAGACATCTTCGGAACGCAAAA
A_30_P01020970	0.648711	1.56777	up		lincRNA:chr10:92238941-92283837 reverse strand	AGACTTTTTGATCTTGCGAATGGTTGCATTGTGTCAGTAGGAAGCCTTTTCAACTGGATG
A_30_P01028897	-0.648672	1.56772	down		lincRNA:chr14:105987405-106063477 forward strand	AAGTTTTGCTGTAGGCAGGAACCTCTGAAACTAAGGGAGATGACTACACACAGAGTCCAT
A_30_P01017493	-0.648491	1.56753	down		lincRNA:chr9:88333945-88342370 forward strand	CAAGACTCCTTAATCAGTGTAAGGCAGCAGTATAAGTAAGCACATTACAAAAGACAAATA
A_66_P127262	-0.648429	1.56746	down		ENV_IPMAE (P31789) Env polyprotein precursor (Coat polyprotein) [Contains: Surface protein; Transmembrane protein], partial (7%) [TC1640761]	AGAAGTACCCCGCCCCAGAATGAAAAACAGGGTTCAAATTTTAAATGTACTACATCCAAT
A_55_P2095570	-0.648182	1.56719	down		Mus musculus blastocyst blastocyst cDNA, RIKEN full-length enriched library, clone:I1C0037K09 product:unclassifiable, full insert sequence. [AK145750]	ATAAAAATCTTAGTCACCCCCAAGCAGGGACAATTTACCCTTAGGGCTAGAGAGCGCATA
A_55_P2173408	-0.648152	1.56716	down			TAACCGGCGTGAGAACACCTTCTAAGATAAGGATATTCAAATAAAATACTCACAACATCA
A_52_P218976	-0.648141	1.56715	down	Cyld	Mus musculus cylindromatosis (turban tumor syndrome) (Cyld), transcript variant 2, mRNA [NM_173369]	AGACCGTTCTGTGGGGCATTCAAGAGTTCCTTCCACAAAAGGCAAGAAAAATCAGATTGG
A_30_P01030702	0.648083	1.56708	up		lincRNA:chr12:76769763-76770169 reverse strand	AATTCACAACGAAAACCACCCAAGAGGCAGTGCTGGCAGCATCTTATTTTTGTGAAATGT
A_55_P1999818	-0.648003	1.567	down			ACTTGAATGCAGTTCTGTGTCTAAGAAGCCTCTCTTCTGCTGCCCCCTTGGTGGCCCCTG
A_30_P01026305	0.647212	1.56614	up		lincRNA:chr3:88409887-88421423 forward strand	TGTCCAAGGCTGTGTCCATGAGTGATATCAATCTCCTTTCGGACTGCTCAGATCCAAATG
A_55_P2362601	0.647165	1.56609	up	D4Ertd681e	Mus musculus 11 days embryo gonad cDNA, RIKEN full-length enriched library, clone:7030402E17 product:DNA segment, Chr 4, ERATO Doi 681, expressed, full insert sequence. [AK078562]	TACATCGTTAGCCCTTCTTCTATTGAATCTATTTGCGGCTGGGCTTACTTGCCTAGCATG
A_30_P01032538	-0.646062	1.56489	down		lincRNA:chr17:63981900-64015625 reverse strand	TACAAAATATTTTTATTGTAAAAACAGTCAACAGAGGTCGACAATGCAAATCTTATCTTG
A_30_P01019674	-0.645954	1.56477	down		lincRNA:chr7:57115122-57121735 reverse strand	ATCATGACAAGGTTAAAAACCAGACAAGCTTTCAAGCCAACAATGTCGAGCTGACGGGTG
A_55_P2113758	-0.645948	1.56477	down	Gria1	Mus musculus glutamate receptor, ionotropic, AMPA1 (alpha 1) (Gria1), transcript variant 1, mRNA [NM_001113325]	CATTTGATCAGACACTAAATATTTGGGGTAGGGATTTCTGTCTTATTTTCAAATAGCCAG
A_52_P214752	0.645926	1.56474	up	Lcor	ligand dependent nuclear receptor corepressor [Source:MGI Symbol;Acc:MGI:2443930] [ENSMUST00000067795]	TGGGAGTGACCGTTTTACTAACATAACTATTTTCTATGTGTGTTTCAGTGGATGACAATC
A_52_P157880	-0.645633	1.56443	down	LOC101056611	PREDICTED: Mus musculus nucleolar protein 56-like (LOC101056611), mRNA [XM_003946373]	AAGTGTATTTAGAGAAAAACTCCGAGAACAAATTGAGGAATGGCTGTCTTTCTATGAGAC
A_30_P01026015	-0.645233	1.56399	down		lincRNA:chr14:79304650-79345152 reverse strand	CAGGCTTTGAAGGTGTAGATGTGCTACTGCATGCTAAGAACTGATGTGTATCATGAACAA
A_30_P01019826	-0.645021	1.56376	down		lincRNA:chr16:29907604-29946602 reverse strand	ATGCAGCAGGGGCACCCAGACAGAAAATTAAAAAACTAATAAAGTCCTCAGTGTGGGGCA
A_52_P586740	-0.644644	1.56335	down	Vmn1r188	Mus musculus vomeronasal 1 receptor 188 (Vmn1r188), mRNA [NM_145850]	ATATTATGCTAGAAAGTCAGGAAATAAAATGGATTTTTCTCATCCTCATGGTCCTGAGAG
A_52_P150236	0.644548	1.56325	up	Apom	Mus musculus apolipoprotein M (Apom), mRNA [NM_018816]	CCAGAGAAGTGTGTGGAGGAATTCCAGTCTCTGACCTCTTGCTTGGACTTCAAAGCCTTC
A_52_P421716	-0.644281	1.56296	down	Gbf1	golgi-specific brefeldin A-resistance factor 1 [Source:MGI Symbol;Acc:MGI:1861607] [ENSMUST00000175868]	ACATGCTTTCACTTAGATGGGTCTACTTGTAATCTACAAATAACTGTCACTCCTTTAAGT
A_30_P01032279	-0.644056	1.56272	down		lincRNA:chr2:158169020-158191295 forward strand	AATCCTGGTCAATGGATTCGCCTTGGTAGGATGCTAAAAACATGGGACACAGGTCGTAAA
A_30_P01027311	-0.644047	1.56271	down		lincRNA:chr2:27394711-27402186 reverse strand	TCTTCAATAAAATGGACTTAACCGAAGATCCCCGGACGTGGATACAAAAGCAGGGACAAC
A_51_P125607	-0.644009	1.56267	down	Celf5	Mus musculus CUGBP, Elav-like family member 5 (Celf5), mRNA [NM_176954]	AGGGGACTTCCTTCCCAGGGAAAGTTTTGAAAAATGAATAGAGGTTCACTACAGTGAACT
A_51_P116007	-0.643889	1.56254	down	Hdac2	Mus musculus histone deacetylase 2 (Hdac2), mRNA [NM_008229]	TCCCATGAGAGATGGTATAGATGATGAATCATATGGACAAATTTTTAAGCCTATCATCTC
A_55_P1970893	-0.643556	1.56218	down	Olfr689	Mus musculus olfactory receptor 689 (Olfr689), mRNA [NM_146750]	GAACTGCCAGTTGACATTGGCCTGGTTGATACTTGGAATTGACATGATTCTGGTCTGTGT
A_30_P01018038	-0.643469	1.56208	down		lincRNA:chr7:3338500-3360725 reverse strand	ATAAAATGAAAAAGATGCCAGAAACGAACGCAAGAATGGTCCTCTGAGGTCGGATGTGGC
A_30_P01033309	-0.643467	1.56208	down		lincRNA:chr13:83867711-83878140 forward strand	GAACAACGCTTGGGTCGCTTGTCCAGTAAAAAGATTGACAATAGGACATTATTCTTTTTT
A_30_P01029997	-0.643393	1.562	down		lincRNA:chrX:148819227-148844227 reverse strand	AAATGATATGCTCAGCTTGTGCATTATGGCACCAGGCAGGTCATCTCAGGCATGATCTTA
A_30_P01027329	-0.643082	1.56166	down		lincRNA:chr15:102932714-102935033 forward strand	TTTCTCTTTGCATTCCCCTCATGCTCTTTTTTCTCTTAGGATTGATGGAGCCACAAACAG
A_30_P01027414	-0.643064	1.56164	down		lincRNA:chr5:109156118-109156422 forward strand	AATGATAAGAGCTGATGAAAGCACCGACAAGGGTAAACATCTAAACTCCACCAAATGTGC
A_52_P56394	0.642487	1.56102	up	Psmg4	Mus musculus proteasome (prosome, macropain) assembly chaperone 4 (Psmg4), transcript variant 2, mRNA [NM_001101430]	CTCGTAGAAAACAGGATTAAGGAAGAAATGGAGACCTTTCCGGAAAAGTTCTGAGCAGCA
A_30_P01018620	-0.642389	1.56091	down		lincRNA:chr17:39980973-39981876 reverse strand	AGCGAGATCAATCAACGCCAGACACGGACCCTCTCGACCCCGAAGAGGGGAAGGAGGACT
A_55_P2036387	-0.642334	1.56085	down	Zfp92	Mus musculus zinc finger protein 92, mRNA (cDNA clone MGC:106388 IMAGE:30478238), complete cds. [BC096436]	TAACTCTGGAGTGCTGGACTAGGCATTTGCCACCAAAGTCAGCTTTGAACTATTACTGCA
A_55_P1959348	-0.642138	1.56064	down	Olfr598	Mus musculus olfactory receptor 598 (Olfr598), mRNA [NM_001011793]	AACATGGTCATTCGAAAGCGGGTGGCACAGATCTTTTTTCTAGATCATGCACATCAGTAG
A_55_P2027915	-0.642031	1.56052	down	Clvs1	clavesin 1 [Source:MGI Symbol;Acc:MGI:1921688] [ENSMUST00000128117]	GCCTGTGAACAAAGGCAGTCGATGAAGCTCAGCAGGCAGTTGCCAGAATGGGCCCTTTGA
A_55_P2122879	-0.641962	1.56045	down	Cacna2d2	Mus musculus calcium channel, voltage-dependent, alpha 2/delta subunit 2 (Cacna2d2), transcript variant 1, mRNA [NM_001174047]	TATTTTCAAATGGTTTATTACAGAAGATCAGTTATTAAATAATGTTCATATTTTCACTTC
A_55_P2041910	-0.641448	1.55989	down			TACTCCTTCATTAATTTTGCCTCCTTCGATGCTTCGGATGCAGCAATTGAGGCCATGAAC
A_55_P2243828	0.641257	1.55969	up	LOC552901	Mus musculus 16 days neonate cerebellum cDNA, RIKEN full-length enriched library, clone:9630008J17 product:unclassifiable, full insert sequence. [AK035826]	GCGAGGTACAGTGTATGAAAGGATAAACTTTTCTCAAGCAGTGGAATAAAAAAGAAATTC
A_66_P115116	0.641191	1.55962	up	Wwtr1	Mus musculus WW domain containing transcription regulator 1 (Wwtr1), transcript variant 2, mRNA [NM_133784]	GGATATAAAGTGTATTTCTTTCAGTGATTTCTCAGTGCATAAGAAGTGCATAAGTCTCAG
A_55_P2185000	-0.641174	1.5596	down	Rap2c	Mus musculus RAP2C, member of RAS oncogene family (Rap2c), mRNA [NM_172413]	ATTTGTTGACTGGAAACTATGTAATAATAAATTTGGACAATATTAACATTTAATTAAATG
A_55_P1965806	-0.641123	1.55954	down			AATGTAAATCAGGGGCACATCGAAGCCACTGAACTGGACCACTCTATGGACAGAAAGAAA
A_55_P2023037	-0.640859	1.55926	down	Gm4759	Mus musculus predicted gene 4759 (Gm4759), non-coding RNA [NR_003967]	CCAAGACCTTTGATCTGCTTGATTGATGACAAAGAAAAGGTTGACACAAATAATTCTGGT
A_55_P2057232	-0.640484	1.55885	down	Zfp282	Mus musculus zinc finger protein 282 (Zfp282), mRNA [NM_146175]	CCACTGGGGTTACAGATTCTGATCAGGGAAAGCGACCAGAGAGTCTCCAACCCCTTCTGA
A_30_P01028721	-0.640408	1.55877	down		lincRNA:chr4:135896689-135918414 reverse strand	ACGAGCTGGCTTCCAAGAACCTGGGGATAGCAGAGCCTTCATTTTAACATTTACAAAAAA
A_55_P1970826	-0.640399	1.55876	down	Adamts5	Mus musculus a disintegrin-like and metallopeptidase (reprolysin type) with thrombospondin type 1 motif, 5 (aggrecanase-2) (Adamts5), mRNA [NM_011782]	CCACGACCCTCAAGAACTTTTGCAAATGGCAGCACCAACATAACCAGCTAGGGGATGATC
A_55_P2262394	-0.640378	1.55874	down	2310007O11Rik	AGENCOURT_13004275 NIH_MGC_136 Mus musculus cDNA clone IMAGE:30294868 5', mRNA sequence [CB575032]	GGAAATAATAAAATTTGTTTTTCAGGTGGGGATAATATATGGGCGTTAAACAACATCGCC
A_66_P119643	-0.640216	1.55856	down	Atrx	Mus musculus alpha thalassemia/mental retardation syndrome X-linked homolog (human) (Atrx), mRNA [NM_009530]	ATTTTAAAGGGCCTGAATTTAGAAGCAGAAGTAAAATGAAAGCTGACAATCTCATAAAAC
A_55_P2000417	-0.639923	1.55825	down	Rhox3e	Mus musculus reproductive homeobox 3E (Rhox3e), mRNA [NM_001184969]	TACCAAGGTTTTGCCGGCTGAAGAGGGAAAAAATGAAGAAGATGGAGGACAGGTGGAGTC
A_55_P1996821	-0.639568	1.55786	down		myosin XVB [Source:MGI Symbol;Acc:MGI:2685534] [ENSMUST00000040703]	CTGGTACTTAGTTCAGTGTCTCCATAGAGGATGCTTAATAAATAACCTTGGTTTTCCTGG
A_51_P292550	-0.63913	1.55739	down	Chdh	Mus musculus choline dehydrogenase (Chdh), transcript variant 1, mRNA [NM_001136240]	TACAAAGAGAAATTTAATATTAAATGAGAGGTTGAACCAGGCTTAAAGCAGACATACCGG
A_55_P2041584	-0.638943	1.55719	down	F420015M19Rik	Mus musculus 6 days neonate spleen cDNA, RIKEN full-length enriched library, clone:F420015M19 product:unclassifiable, full insert sequence. [AK143604]	GGGGTGGCTCCCTTCCTATGGGTTAGGGAAATATTTACAAGGAAGAAAGTCCCTCATAAT
A_55_P2212663	-0.638929	1.55717	down	Gm3143	UI-M-FY0-cfe-h-13-0-UI.r1 NIH_BMAP_FY0 Mus musculus cDNA clone IMAGE: 6848414 5', mRNA sequence [CB525807]	TTTGTTCTGTGGTCGGACTTAGTTCAGTCAGCAAGTCTGGGCCAAGTACACTGTATCAAT
A_55_P1991321	-0.638751	1.55698	down			GGATTCAGCCCTGAACAGTGACAAAATCAGAAACTTGTCTTCACAAACTTAAGACTCTGA
A_30_P01029779	-0.63837	1.55657	down		lincRNA:chr13:31736054-31781679 reverse strand	TCCATAGTGTCATTTCCACAGTGACTGAAGACCTTCCAGTAGGTCCAACCTCATAAATGC
A_55_P2114188	0.638062	1.55624	up	Gm5105	Mus musculus predicted gene 5105 (Gm5105), long non-coding RNA [NR_037975]	GTGCACACTCACATACCCTGACCCAGGCACATGTAAATATACAATTAAAAATAAAATGTA
A_30_P01033575	-0.637997	1.55617	down		lincRNA:chr16:8738782-8830148 reverse strand	CGAGCGCGGCCAGCCGGTCACCCGCCCGCGCAGCCTCAGCGGTCGCCGCCGCAGCCCACA
A_55_P2109263	-0.637895	1.55606	down	Ppp1r14b	Mus musculus protein phosphatase 1, regulatory (inhibitor) subunit 14B (Ppp1r14b), mRNA [NM_008889]	TATATTGACTCTGCGGCGCAGGCCCTTTAAAAATAAAGCTAGGATACAGCCTTTGGAGCA
A_55_P1959784	0.637745	1.5559	up	Mef2b	Mus musculus myocyte enhancer factor 2B (Mef2b), transcript variant 1, mRNA [NM_008578]	AAGAGGTTCCTCCAGCCTCCACAGAGTTCCCGAAGTCTCAGGTTCCCTATACCACCAGGA
A_55_P2089342	-0.637455	1.55558	down	Gm13547	predicted gene 13547 [Source:MGI Symbol;Acc:MGI:3650473] [ENSMUST00000113808]	GAGTGGCAGTCACACACCCAAACCAGTCGCCTTCAGGACTGCAATAACCAACGTTTACAC
A_55_P2143070	-0.637342	1.55546	down	Ass1	Mus musculus argininosuccinate synthetase 1 (Ass1), mRNA [NM_007494]	TGTTGTGATAAATTTGTAATTGTAGCTTGTTCTCCACCACCTGACTGGGGCTGCTGTGTC
A_30_P01028073	-0.637004	1.5551	down		lincRNA:chr8:13200727-13207714 forward strand	TTGTTTTTCCACTTTGCTTCCTTGCTTGTCGAGGCTGAGAACATACGGTGTTTTTGAGGG
A_30_P01023054	-0.63685	1.55493	down		lincRNA:chr13:108548345-108679004 forward strand	TCTGTTCATCTGAAAGAGAGTCTCTGAAATGGGAAGATGCAGTTTGACCTGCTCTGGCTT
A_55_P2162688	0.636763	1.55484	up		T cell receptor gamma, constant 4 [Source:MGI Symbol;Acc:MGI:98628] [ENSMUST00000103566]	TTCGTTGTATTCTGTCTATTCAGAAGAGCAGCCATGTCCTGTGATGATCAACGTTCATAA
A_55_P1957173	0.636541	1.5546	up	D14Ertd670e	H3085G09-5 NIA Mouse 15K cDNA Clone Set Mus musculus cDNA clone H3085G09 5', mRNA sequence [BG083215]	GCTCTTCCCTTTTCTGCCTCTTGTAATGATAGTCTCTCAGTTACTCTTAACTCAGAAACT
A_55_P1961165	-0.636534	1.55459	down	LOC101055913	PREDICTED: Mus musculus small ubiquitin-related modifier 2-like (LOC101055913), mRNA [XM_003945650]	TGTAAGATTAAGAGACGTACATCACTCAGTAAACTAATGAAAGCCTATTGTGAATGGCAG
A_30_P01024110	-0.636517	1.55457	down		lincRNA:chr18:47327300-47333819 reverse strand	AAGTCTCAGCATCAAAAAGCATCCTTCCCAAAGAAACCAACTGTGACAGTTAAAAACAAA
A_55_P2115981	-0.636202	1.55423	down	Xlr5c	Mus musculus X-linked lymphocyte-regulated 5C (Xlr5c), mRNA [NM_031493]	TGTACTGTGAAAGATTTGGGTCGGTGTACCACAATTGGCTGGTTGAGATGGACAGAACAA
A_30_P01019187	-0.635992	1.55401	down		lincRNA:chr11:22510175-22522025 forward strand	GGGTAGCAGAGAAGACAAGGAACACATCAAAAAGACTAGCCCGTAGACATGCAACAAACA
A_30_P01018388	-0.635582	1.55356	down		lincRNA:chr14:77006215-77063293 forward strand	CAGTTGTCGAGTGTGATGAAATTCTAAGAGAAGCCTCCAGAAACAAAATGTAAAGACAAA
A_55_P2131016	-0.635464	1.55344	down	Nkx1-2	Mus musculus NK1 transcription factor related, locus 2 (Drosophila) (Nkx1-2), mRNA [NM_009123]	TCAAAATTTGGTTCCAGAACCGCAGGACCAAGTGGAAGAAGCAGAACCCAGGGGCCGACG
A_52_P956363	0.63504	1.55298	up		predicted gene 9938 [Source:MGI Symbol;Acc:MGI:3641836] [ENSMUST00000067077]	CTGGCGAAGTTAGGGTCTTTTGATTTATATTTCATCAATTGGCAATTTTTTGTACCCTAC
A_30_P01029335	-0.635036	1.55298	down		lincRNA:chr17:64063362-64066067 reverse strand	AAATGACAGCTCAATGTCACAGGAGGAAAAATATAATCACGGCTCACTCTGTACTCCAAT
A_55_P2029603	0.63498	1.55292	up	Muc4	Mus musculus mucin 4 (Muc4), mRNA [NM_080457]	CTAACTTGTCATGGGTACTCCAGCCCAAGACCGTGGCTTGCTTCTGCAGTAAGGAGGAGC
A_51_P331661	0.6349	1.55283	up	Ubiad1	Mus musculus UbiA prenyltransferase domain containing 1 (Ubiad1), mRNA [NM_027873]	TTTATATACCATCCCCAGAGGCCATATTTGGTGCCACATTTTGTATACAGACCACCATAA
A_51_P290931	0.634308	1.55219	up	Ptprb	Mus musculus 14, 17 days embryo head cDNA, RIKEN full-length enriched library, clone:3230402H02 product:similar to Protein-tyrosine phosphatase beta precursor (EC 3.1.3.48) (R-PTP-beta) [Homo sapiens], full insert sequence. [AK019450]	TCTGTACTCCCTAAAGGTGAGCTATTATAAGGCTAACAAAGTTGCAAACATTTAACTTTG
A_30_P01031726	0.634256	1.55214	up		lincRNA:chr6:121053274-121053553 reverse strand	ATCCAAGACTGCTTGCTTGTCTCTTGCACATTACAGGGAGCCTTTCTAGGCTTTACCTAA
A_51_P239800	-0.634239	1.55212	down	Myh8	myosin, heavy polypeptide 8, skeletal muscle, perinatal [Source:MGI Symbol;Acc:MGI:1339712] [ENSMUST00000108686]	GGAGGATTCACAACGTTGAAGCAAGTAGTTTAAAGCTAAATTCCCAAATCTTACTCAAAT
A_30_P01028219	0.634077	1.55194	up		lincRNA:chr4:21683562-21694350 forward strand	CAGTAGGCTTTTTAGTTCCCTATAAGTCACACCCTTAGGAGTAGAACAAAATGCTTGGCT
A_51_P257841	0.633993	1.55185	up	1700034I23Rik	Mus musculus RIKEN cDNA 1700034I23 gene (1700034I23Rik), non-coding RNA [NR_045380]	ACAGACTTCATAGACCTAAGGAACCACTTATTTATAAGCCAACTGGCTCTTTGCAGTTTG
A_55_P1999824	-0.633438	1.55126	down		predicted gene 9750 [Source:MGI Symbol;Acc:MGI:3642669] [ENSMUST00000142025]	AGAAACATACTATCCTGGGATCGATTTCTTCTACTTGATGAACTACTTTTCCCTGTTCAA
A_51_P240703	-0.633305	1.55111	down	Gpr151	Mus musculus G protein-coupled receptor 151 (Gpr151), mRNA [NM_181543]	CTTGAAAGGCCTATGGAAATGGATGATAACCAGAAAGCCAGCAGTTACTTCAGAGGTTCA
A_55_P2159911	-0.632971	1.55076	down		Mus musculus (clone 1B3S) IgH chain mRNA, VDJ region. [M18488]	CAAATTATCATTCAGCTCTCATATCCAGACTGAGCATCAGCAAGGATAACTCCAAGAGCC
A_30_P01033056	-0.631994	1.54971	down		lincRNA:chr9:68349343-68411643 reverse strand	ACGATCATGGTATGGAATGTGCCACCCAATAACACGCACTCTGTTACTACTGCCTTAAGA
A_66_P138206	-0.631493	1.54917	down	Olfr872	Mus musculus olfactory receptor 872 (Olfr872), mRNA [NM_146560]	TACTGCAATTTACATATTTCAATGACATGGAAATCTCTAACTTCTTTTGTGACCCTTCAC
A_66_P118322	-0.630676	1.54829	down		RIKEN cDNA I0C0044D17 gene [Source:MGI Symbol;Acc:MGI:3588230] [ENSMUST00000097964]	CTATCATGAAAGCTTCGTGGAAATGAAGTCATCCTAATAACTATGTTTCTGTCGAAACGG
A_55_P2160628	-0.629317	1.54683	down	Kalrn	Mus musculus kalirin, RhoGEF kinase (Kalrn), transcript variant 1, mRNA [NM_177357]	ACGTACAAAGAGAAAGGGGCATTCTCTGTATAGTTTGATGACTGAAGTGAACAGGGAGGC
A_51_P492266	-0.628926	1.54641	down	Spint4	Mus musculus serine protease inhibitor, Kunitz type 4 (Spint4), mRNA [NM_030058]	CGTTCTCTAAGAGCATTGGCAACCAAGAACCTTGCTACGGATTGGAGATTGACCACTTTA
A_30_P01021118	-0.628696	1.54617	down		lincRNA:chr3:51004595-51005002 reverse strand	GATAAACTAATGCCACTCTGTAGGTAGTTCTAATTTTACACGTTTGTCAAGCTCTGAGTC
A_30_P01028229	-0.628587	1.54605	down		lincRNA:chr13:34821764-34822230 reverse strand	ATATATTTAATAAATACCTGTTATCTCCATGTTCACATCTTTCCTTAAAAACTGCCTTCA
A_30_P01028027	-0.628511	1.54597	down		lincRNA:chr18:38776580-38841080 reverse strand	CGAGCTGTAGGAACAATGAGAATCAGATGCTTAAGACTAGGGGAAAATACACAAAAATAC
A_30_P01023605	0.627529	1.54492	up		lincRNA:chr5:100845342-100869667 reverse strand	AAACTCTTCACTGCTGTTCACATACTGAGCCGTTGTGATTATTGAGGAACTAATGAGGAT
A_55_P2021923	-0.627495	1.54488	down	Fkbp1a	FK506 binding protein 1a [Source:MGI Symbol;Acc:MGI:95541] [ENSMUST00000144171]	GGAAGGGAAGACAAGACAGCCCGCTCACATCCTCCTCTCTGTGCCCCCTTACTTCTATGA
A_30_P01031380	-0.62748	1.54486	down		lincRNA:chr7:134807861-134809001 reverse strand	ATACAGGAAGCATCATCTAGGCCCAGCTCCTGATTGGCGACTTCCCAGAAGCCATGGGCT
A_30_P01023312	-0.627428	1.54481	down		lincRNA:chr18:83087114-83122014 reverse strand	GTCCCAGAAATGTACTCATATGCCCCAAGTATATCTCCTTGGAATAAAATTACTTTAAAG
A_30_P01021614	-0.62742	1.5448	down		lincRNA:chrX:146827709-146913398 forward strand	CACAACAGTAAAGCCAACTTGAAAAATAAAGGGATTTGTTCTAAGGCTGTGAATATCAAC
A_55_P2280581	0.627323	1.5447	up	A130088B03Rik	Mus musculus 16 days neonate thymus cDNA, RIKEN full-length enriched library, clone:A130088B03 product:unclassifiable, full insert sequence. [AK038224]	TATTTATTTTGAGGAGAGGGTCTACTTCACAGTAATGTGCCCAGCCAGTAACTACCTGGC
A_55_P2162640	-0.626542	1.54386	down			TTGTGGAGATTGATGTGAAGTGACTCAGTGAGAACACCATGGAGAAGGTGAACATCAAGC
A_55_P2029294	-0.626447	1.54376	down	Cetn4	Mus musculus centrin 4 (Cetn4), mRNA [NM_145825]	CTTGGCCCCCAGATCCAGATGAAATTGTTTTTAAAAACAATCTGAAAATGGTATTTTTCC
A_55_P2018452	-0.626183	1.54348	down	Tas2r121	Mus musculus taste receptor, type 2, member 121 (Tas2r121), mRNA [NM_207024]	AATTTAAGGCAAGCCAGTCTTTGGGTGATGACATATCTTAAATGTGGGCAAAAGCATTAG
A_55_P2081772	-0.626119	1.54341	down	Gm9558	Mus musculus adult male testis cDNA, RIKEN full-length enriched library, clone:1700034M11 product:similar to 60S RIBOSOMAL PROTEIN L31 [Mus musculus], full insert sequence. [AK006604]	GGAATAAAGAACATTCCATATCACATTGTTCAGAAAACGTAATGAGGGAAAGGAGTCACC
A_55_P2108216	-0.62558	1.54283	down			TGGCATATCAACCGCTCAGGCTCCTGCAGGAAACAAGGGCATCATCTAAGAAGGTCATAA
A_55_P2170054	0.625337	1.54257	up	Gm7854	Mus musculus predicted gene 7854 (Gm7854), long non-coding RNA [NR_028417]	CCTTTAGGTAAGTCTCATGGCTTTTTGTCTGAGTTTCATGATATTATTTGTAACATGACC
A_30_P01029258	-0.62519	1.54241	down		lincRNA:chr15:84737071-84744158 forward strand	CTTTATGGTCTTGGATTGGAACACAAAGATAGGATGACATCATAATCCTGGGAACCCATT
A_30_P01023169	-0.625124	1.54234	down		lincRNA:chr2:32950586-32984936 reverse strand	ATCATGGAAAGCATTTTAGGCTCATGATGTGACCTGTAAAAGCACCAAGAGCCACTTCCC
A_55_P2359436	0.625063	1.54228	up	A930026B05Rik	Mus musculus adult retina cDNA, RIKEN full-length enriched library, clone:A930026B05 product:unclassifiable, full insert sequence. [AK020890]	CACACTGTACACATACACATGTGCAGGGAAAACACTCACTCACGTAAAGTAAATAAATCT
A_51_P485458	-0.624562	1.54174	down	Txlna	Mus musculus taxilin alpha (Txlna), transcript variant 1, mRNA [NM_001005506]	CATTCCAGTCGTCAACGGCGAGAAGGAGACCTCTAAGGGAGAGCCTGGAACAGAGGAGAT
A_55_P2115435	-0.624246	1.54141	down	Prm3	Mus musculus protamine 3 (Prm3), mRNA [NM_013638]	TGTGAGTCAAGACAACTTTTCCCTGTCATCAGAGGGCGAGGAAGAGGAGGAGGACGAGGA
A_30_P01018034	-0.624157	1.54131	down		lincRNA:chr11:33414450-33450750 reverse strand	AGCAGTCTCTTCGCCTATCTACCACAGATTTAGGAGCCAAAGTGGGCAGTAACACACACC
A_30_P01024027	-0.624043	1.54119	down		lincRNA:chr10:96100545-96101009 forward strand	AACACAGTAGACAATGAATAGAGCCTTCCACTTGATCCAGAGCTTAAGATCTGCAGAGAT
A_55_P1961210	0.624005	1.54115	up	Trp53inp2	Mus musculus transformation related protein 53 inducible nuclear protein 2 (Trp53inp2), mRNA [NM_178111]	GTGTGTAACAGGATTCTGAATGTTAGGTTGTAATGCTATTCCTGTATGGGAGAAAAAATA
A_55_P1991304	-0.623963	1.5411	down			TAAGTGCTAAGAAACTCGAAGCCTCAGAAAACGAGGACGGGAAGATTAAAGCCGAGCATT
A_30_P01025743	-0.623955	1.54109	down		lincRNA:chr1:13058312-13099826 reverse strand	GAGCCCAACTACAGTGGCATAAAAGCCCAGGGTCTTGCAGAGTCTCAAGTCCTCTTGTAT
A_30_P01020870	-0.623895	1.54103	down		lincRNA:chr8:91569369-91594119 reverse strand	ATAATTAATGGTGCAGGTTTGAAGGAGAAAGGCTGCCAGGCTAATGGAACCTGAAGAGAG
A_30_P01029252	-0.623792	1.54092	down		lincRNA:chr5:23195569-23218551 reverse strand	GAATTTTGAGGCATTCTCATTGCATATAGAGAACATGAGAATTTTGTGTCTGTCGAACTA
A_30_P01022064	0.623516	1.54062	up		lincRNA:chr6:100162756-100178531 reverse strand	TGGCTTGAGAATGGTTGCCGTTTTCGTACCTGCCACAGTACAGTGCCTAGTTGTGGAGGG
A_55_P2093704	-0.623123	1.54021	down	Meig1	Mus musculus meiosis expressed gene 1 (Meig1), mRNA [NM_008579]	TCACAATTCTGTCTTTAATTCATGGTGTCTTACACAACATAAACACCCACCTTGAAACCT
A_30_P01031493	-0.622557	1.5396	down		lincRNA:chr7:3338500-3360725 forward strand	TGTCAAATAGAAATGTGGTGGCCAAGTTGAGAGCCAGAAGAGAGGTGTGGTCAAATCAAG
A_30_P01021697	0.622416	1.53945	up		lincRNA:chr10:39619134-39627737 forward strand	TTCTGACACAAGGCTGCAAATTTACAGACCTTCACAGGTTTTTGCTTTTCCATCAAATTT
A_55_P2168461	0.622332	1.53936	up	Brox	Mus musculus BRO1 domain and CAAX motif containing (Brox), mRNA [NM_027861]	GAATAATAATGTATCTGAGAACTTACTGTGTGCCAGACGTGTATAGGCACATATGTAGAC
A_55_P1987096	-0.62225	1.53927	down	Mxi1	Mus musculus Max interacting protein 1 (Mxi1), transcript variant 2, mRNA [NM_001008542]	CCAAAAAGCCCCATTTCTGAAATCCTGGTTCATACACATAAAACTTGAACTTGTATTTAG
A_55_P2040255	-0.622006	1.53901	down	Gm10033	Mus musculus predicted gene 10033 (Gm10033), transcript variant 1, long non-coding RNA [NR_038043]	CAGCAGTCTTCAAAAACATGAAAAAGATCATACTAGAGATACAACCTATGAGTCTAAGCA
A_30_P01028453	-0.621974	1.53898	down		lincRNA:chr15:98842850-98853100 reverse strand	TCTGTCAACAAGCGCGCAAAACCTGAGCTACTGCAAGTGCCAGGAGTACAGGAAAGGCCC
A_55_P2172935	-0.621767	1.53876	down	Dgkb	Mus musculus adult male hypothalamus cDNA, RIKEN full-length enriched library, clone:A230032P06 product:DIACYLGLYCEROL KINASE, BETA (EC 2.7.1.107) (DIGLYCERIDE KINASE) (DGK- BETA) (DAG KINASE BETA) (90 KDA DIACYLGLYCEROL KINASE) homolog [Rattus norvegicus], full insert sequence. [AK038544]	CTAACTCAGTTACTATGGATGGACAAGGTTTGCAGGTAATGGATTCAAAGTTCAAATTAT
A_30_P01028192	-0.621641	1.53862	down		lincRNA:chr7:91558475-91733625 forward strand	AAATCATTGTTCTGTGGGCATCTGAACAGAATGAATAATCTCTACAAGCAATGATAATGT
A_30_P01027647	-0.620396	1.5373	down		lincRNA:chr4:131734714-131741964 reverse strand	TTCTTCCTGTACTGAATCATTCAATTCAGCCTGTTATTTTGCGCACCCTTGCTGCTCCTG
A_30_P01025228	-0.620321	1.53722	down		lincRNA:chr1:161973754-162006639 reverse strand	TGTTGTCCAAATGTGCATACATATGATACAAACAGAGTTGAAAGCCATCTAAGATGCATA
A_55_P2069760	-0.620303	1.5372	down	Sprr2b	Mus musculus small proline-rich protein 2B (Sprr2b), mRNA [NM_011469]	ATAAATGAGGGTTTCCCAGTCATCAGGACTGGGAAGTAAGAGAAATCTGTCTCACTGGCT
A_52_P188042	-0.619959	1.53683	down	Trat1	Mus musculus T cell receptor associated transmembrane adaptor 1 (Trat1), mRNA [NM_198297]	TGGATGCCAACGTTTCTCAGATCAATATGGTAGAAAGTTTCCCACCAGATAACCAGGTAG
A_55_P2087850	-0.619877	1.53674	down	Gpr55	Mus musculus G protein-coupled receptor 55 (Gpr55), mRNA [NM_001033290]	AGACTTCGTGTGCTTTAGGAAGAAAAGCTAACTAGGTAGAATATCCAGGGTCAGAGGCCA
A_30_P01028008	-0.619624	1.53647	down		lincRNA:chr6:36765550-36793825 forward strand	CCCTTATGGACAAAAGGGGAGATGGTTAACTAAGACTGCAATCTTCTTAAATAGAAATAT
A_55_P2173601	-0.619595	1.53644	down	Csmd2	Mus musculus CUB and Sushi multiple domains 2 (Csmd2), mRNA [NM_001281955]	ACAGACATCATGAGCAACGAGGCGGAGTTCACAGTCAGCACGGTGTGTACTGCGGTATAG
A_55_P1965994	-0.619351	1.53618	down	Zfp329	Mus musculus zinc finger protein 329 (Zfp329), mRNA [NM_026046]	TTTAATTGCTGAGGAAAGGCAATCCCTAGGGATTACCTAGGGATAACAAATGGAAGGGCG
A_30_P01019224	-0.618896	1.5357	down		lincRNA:chr2:67407510-67407845 reverse strand	GGTTTAGGTTTATGACTGATTGATAGCTCAACACTAATTCAAGTCCTTGATAAGGATACA
A_55_P1970915	-0.618629	1.53542	down	Kdm4d	Mus musculus lysine (K)-specific demethylase 4D (Kdm4d), mRNA [NM_173433]	AAAGCCACTTGAGAGTCACAGATGACCTCTCAAAGTTGATGTGTTACACAGTGTCTCACC
A_51_P429865	-0.617908	1.53465	down	Msh5	Mus musculus mutS homolog 5 (E. coli), mRNA (cDNA clone MGC:176074 IMAGE:9055725), complete cds. [BC141113]	CACGAATGAGCTTCTAAGGAGAAACCAAATGGAAAACTGCCAGGCACTGGTGGATAAGTT
A_30_P01017948	-0.617738	1.53447	down		lincRNA:chr12:76744947-76778372 forward strand	AACTCCGCCCTCCGGCTCTGATTGGGTAAAAATATAGAGGAAGCTGAAGCGGATTGGTCC
A_52_P378287	0.617242	1.53394	up	Lca5	Mus musculus Leber congenital amaurosis 5 (human) (Lca5), transcript variant 2, mRNA [NM_027448]	CTGGAGCAGTGTGTCCATTTGTTCATAGTGTGCATCTTACGCAAGGCATACATACTGATT
A_55_P2097972	-0.617017	1.5337	down			AGCAGGCGAACCGCTGGGGCTCGGGCTGTAGGTCTCAGTGCCCATATCCCGCCCCTTTAG
A_30_P01024812	-0.616166	1.5328	down		lincRNA:chr16:40657997-40658456 reverse strand	AGTGTCTAATTTCACCCAATGAGACTTTGAGACTTTTAAGGGGCTGCTCAGTAGGGAGGT
A_55_P2040285	-0.616137	1.53277	down	Olfr360	Mus musculus olfactory receptor 360 (Olfr360), mRNA [NM_146622]	GCACTATGGAGGCTTTTTAGGAAACTCCATACTTCAGACTGGCTCTCAGACAAAGAATGA
A_55_P2076524	-0.615823	1.53243	down	1700028I16Rik	Mus musculus RIKEN cDNA 1700028I16 gene (1700028I16Rik), long non-coding RNA [NR_038042]	TTATAAATCAAGCTGATCTGGAACTCACCAATATCCACCGCCTCTGCCTCTCATTGTTGG
A_55_P2032920	-0.615622	1.53222	down	Olfr23	Mus musculus olfactory receptor 23 (Olfr23), mRNA [NM_010970]	GAACAGAGACATGAAGGAAGCTCTAAAAAGAGTGCTTCAAAAGAAAATAAAACTCTCTTC
A_30_P01023385	0.615517	1.53211	up		lincRNA:chr15:38639259-38639546 reverse strand	GGGGAGATAGGGCATGGGGAAGAGCTGACTAGGTTCTCAGTTTCCAGCCACCATTATCAC
A_55_P1998048	-0.615499	1.53209	down	Gm20806	Mus musculus predicted gene, 20806 (Gm20806), mRNA [NM_001160135]	GGTTTAAACATGCAAGATCTTCAGTCCCAGGCAATGAGCAAGTATGATATTTGAAGGGAA
A_30_P01027460	-0.615462	1.53205	down		lincRNA:chr12:88216447-88224965 forward strand	ACTATGCGTCCCACGCCGAGAAGCCACCGATGTTGCTGCTGAGGATGAGTTGGGGCTCTG
A_52_P28960	-0.614432	1.53096	down	Gdf6	Mus musculus growth differentiation factor 6 (Gdf6), mRNA [NM_013526]	CTAAAGTTACTGGAGGTCGATTGATATACAAAACATTTTTACAGTATACCTTCTTGGACG
A_52_P747842	-0.61436	1.53088	down	9130204L05Rik	Mus musculus RIKEN cDNA 9130204L05 gene (9130204L05Rik), mRNA [NM_001101461]	TGGGAATGGTGTACTACAAGAAGATGAACAACAATGCTTTTGAACGTTAGCATCATCACA
A_55_P2410586	0.614351	1.53087	up	9330156P08Rik	Mus musculus adult male diencephalon cDNA, RIKEN full-length enriched library, clone:9330156P08 product:unclassifiable, full insert sequence. [AK034105]	TTTTCCTCATCTGCCTTGTTAAGCTGCGTTTGAGAGAGTCTTCATAATGGCAGCAATCCC
A_51_P352357	0.613704	1.53018	up	Ldhal6b	Mus musculus lactate dehydrogenase A-like 6B (Ldhal6b), mRNA [NM_175349]	TGTTCCTCAGCGTGCCTTGTATCCTGGGAGAGAGTGGCATATCTGATATCATAAAGGTAA
A_30_P01028970	-0.613322	1.52978	down		lincRNA:chr3:41143423-41359623 forward strand	TCCTCTAACTGTGCTTGCTTTTGACGCCTCTCAAGTGCCCTCTCCATCCTGAACCAGGTA
A_30_P01029463	-0.612845	1.52927	down		lincRNA:chr5:120269342-120279542 forward strand	TTATAGGTGGATGCATGTTTTAATACTCCAAGGAAGCTTACATGATGATATAGCTACACA
A_30_P01023615	0.612807	1.52923	up		lincRNA:chr19:27448093-27462793 reverse strand	TGAAGGTTTTTATGTTTGCAGTGTGATGTGAGAAGCGGTGCTGTGCTCTGACACAGTCAT
A_52_P161707	0.612522	1.52893	up	Cand1	Mus musculus cullin associated and neddylation disassociated 1 (Cand1), mRNA [NM_027994]	GATGGCGGTCCCGTGTCTTACTAGTCTGTGATAAGCTATTACTCTGGAAAGTTACTTTGC
A_55_P2082454	-0.612311	1.52871	down		Q76M58_HUMAN (Q76M58) 40S ribosomal protein S12, complete [TC1641505]	AAATGCCTTCCACCATCATCTCAATCTATAGCAATTGGTGGAAGGTGACAAAATAAAAAA
A_55_P2006296	-0.612114	1.5285	down	Krt13	Mus musculus keratin 13 (Krt13), mRNA [NM_010662]	AACAAGGAAGTATCCTCCAACGCTGAAATGATCCAGACCAGCAAGACAGAGATCACAGAA
A_55_P1976694	-0.612047	1.52843	down	2014-09-11	Mus musculus septin 11 (Sept11), mRNA [NM_001009818]	TGCAATCCCAGGCCCAGCAGTCTGGGGCCCAGCAAACCAAGAAGGACAAGGATAAGAAAA
A_55_P2378030	0.611534	1.52788	up	4933439N14Rik	Mus musculus adult male testis cDNA, RIKEN full-length enriched library, clone:4933439N14 product:unclassifiable, full insert sequence. [AK019859]	AAAGCACGGGCATACTCATCTGCATCTCTCTTTTAATAAACTATCTCTCTTCCTGCAACT
A_55_P2028039	-0.611455	1.5278	down	Olfr957	Mus musculus olfactory receptor 957 (Olfr957), mRNA [NM_146745]	AGGAATAAAGATGTCAAAGTTGCCTTCTATAAGGTTGTAGGAAGAAGAGAATTCATGTGA
A_55_P2160528	-0.611244	1.52758	down	Slc8a3	Mus musculus solute carrier family 8 (sodium/calcium exchanger), member 3 (Slc8a3), transcript variant 2, mRNA [NM_080440]	AACAAGAATTACGTCATTGAGATGATGGGCCCCCGCATGGTGGATATGAGTGTTCAGAAA
A_55_P2139501	-0.61086	1.52717	down	Alk	Mus musculus anaplastic lymphoma kinase (Alk), mRNA [NM_007439]	TTCCATGTCTCATAGGGGGAGTCCTAGGTGTTTCCTTTGCCTTATGAATATGAACCACTC
A_51_P491856	0.610749	1.52705	up	Olfr1358	PREDICTED: Mus musculus olfactory receptor 1358 (Olfr1358), mRNA [XM_622784]	AGAGCTCACTCAAGGGACTTGGCATCTTCTTCCTGAGCATCCTCGTGGTGCTGGTCTCCT
A_55_P1961736	0.610567	1.52686	up	Rcan2	Mus musculus regulator of calcineurin 2 (Rcan2), transcript variant 3, mRNA [NM_001286653]	TTTGTGCACGTGTACAGCTCAAAGAGCTTAGAGTTCAAATATATCTGGTGAATGACTGTC
A_55_P2021921	-0.61043	1.52671	down	Fkbp1a	Mus musculus FK506 binding protein 1a (Fkbp1a), mRNA [NM_008019]	AACGCCGCCGCCGCCGCCGCCGCCATGGGAGTGCAGGTGGAGACCATCTCTCCTGGAGAC
A_55_P2161450	-0.610007	1.52627	down	Serpina3b	Mus musculus serine (or cysteine) peptidase inhibitor, clade A, member 3B (Serpina3b), mRNA [NM_173024]	ACCTCCACCTCCATCACCCAAAATGAAAGGGAGGAGCAAATGATCAATAAACGTATCCCT
A_30_P01024663	-0.609554	1.52579	down		lincRNA:chr14:20893694-20903726 forward strand	ATACAAACAGTACTGAAGGAAATGGATGGCAGAGTGTCTGCAAGTGGGAAACCTGAATAC
A_55_P2303110	-0.609288	1.52551	down	Ccnb3	Mus musculus cyclin B3 (Ccnb3), mRNA [NM_183015]	AGCAAGATCTAGAGAATCTTTTGAATTGGGCATTATTCCACTGAGGACCTCTGACAGCAG
A_30_P01030204	-0.608508	1.52468	down		lincRNA:chr14:73729977-73751877 forward strand	ATGAAGGCACTTCCACACCCTGGGTGGAACAGAGGAGCCCTGTAAAGTCCAGACACTCCA
A_55_P2001453	-0.608489	1.52466	down	1700045H11Rik	Mus musculus RIKEN cDNA 1700045H11 gene (1700045H11Rik), long non-coding RNA [NR_040649]	GAAAAACCTCTTTAAAACTAAGGTGATGTTTCCAGAAATAAAGATCACATAGTGGTTGCC
A_55_P2240634	-0.608299	1.52446	down			TATCTTCTCCTGAACTTCACATGTGCTCATGAGCCCAGGGAAGATTTTGGGATGTCCTTA
A_52_P325443	0.608266	1.52443	up	Arhgap29	Mus musculus Rho GTPase activating protein 29 (Arhgap29), mRNA [NM_172525]	TGTGTAGTTCTTTCAAATGGAGTGAAGATTTATTTAAGTTAATCCTAAGGGTACACGTCG
A_30_P01029533	-0.607973	1.52412	down		lincRNA:chr9:88610323-88614622 reverse strand	GGAATGGCGGCGGTCACGGTAAACAGTGCCAAGCGGGGCCTGCGGGCCGAGCTGAAGCAG
A_55_P2112667	-0.607921	1.52406	down	Fshr	Mus musculus follicle stimulating hormone receptor (Fshr), mRNA [NM_013523]	TGTGACTCATCTAAGAACTGAATTATTGGTAACCGCAATTAAAATAGTGCAACACTGCTG
A_55_P2185178	0.607627	1.52375	up	Tmem28	transmembrane protein 28 [Source:MGI Symbol;Acc:MGI:3648377] [ENSMUST00000096363]	GGGGCAGAGACATCTCTGCTCTTGTTTAACCCCTTAAAGAAATAAATGGTAAGACTTGAT
A_52_P558382	0.60738	1.52349	up	Mapk8	Mus musculus mitogen-activated protein kinase 8 (Mapk8), mRNA [NM_016700]	CTGAGTGTAAATTATAAATGTGCGTTGAATACTTTCTAGCCACTGTTCACAAAATACCAG
A_51_P472003	-0.60682	1.5229	down	Ttc22	Mus musculus tetratricopeptide repeat domain 22 (Ttc22), mRNA [NM_177667]	AGGGAAAGAGTTTTACAAACACACAGAAAATAGGATGCCTCAAGGCTCCTCACAGAAAAG
A_55_P2111790	0.606799	1.52288	up	Gem	Mus musculus GTP binding protein (gene overexpressed in skeletal muscle) (Gem), mRNA [NM_010276]	CCCATCCTTTGGGTTGCTTCTTGTATGCCACAGCTGAATTATATTTATTATTTTGCAAAT
A_55_P2029630	-0.606566	1.52263	down	Mpdu1	Mus musculus mannose-P-dolichol utilization defect 1 (Mpdu1), mRNA [NM_011900]	ACACTCCAGACCGTTGCCATCTGCTTCCTGGTCATGCACTACAGAGGAGAGACCGTGAAA
A_55_P2431897	-0.606499	1.52256	down	Thap6	Mus musculus THAP domain containing 6 (Thap6), non-coding RNA [NR_028429]	GAAAAGAGAAAAACTTCACTGTAGAAAAAACTTCCTTCTCAAAACCCTTCCCATCACCCA
A_55_P2073288	-0.606495	1.52256	down	Gm11468	Mus musculus predicted gene 11468 (Gm11468), long non-coding RNA [NR_033467]	AATCATGCCGACTCTTCTGTAGAACTTAACGAGCAGAGACACAACCATGGGGAAGAACAT
A_30_P01030677	0.606343	1.5224	up		lincRNA:chr4:135911688-135915355 forward strand	AGGAGTTTGTCTTTCGCTGTTAAAACACGGTCAACTGACTGCTGAGACTTTCCCTAGAAT
A_55_P2055632	-0.606236	1.52228	down	Rtfdc1	Mus musculus replication termination factor 2 domain containing 1 (Rtfdc1), mRNA [NM_025542]	TTCTCGTCTTTGCTAAGGCTTCTGGTTTTTGCTACGGTTTCTGATTTCGGCTTTGGGATG
A_51_P131216	0.606214	1.52226	up	Usp54	Mus musculus ubiquitin specific peptidase 54 (Usp54), mRNA [NM_030180]	TGCTCTCAAGGGCATCTTTAACCAGTTTCAGTGTAGTAGTGAAAAAGTGCTTCCTTCCGA
A_55_P2071360	-0.605989	1.52202	down	Gm15762	Mus musculus adult male testis cDNA, RIKEN full-length enriched library, clone:4930505I11 product:unclassifiable, full insert sequence. [AK076842]	CACAAAACTACCAAGACTGTGAAGAGGGAAAGTGCTAGCCTGGAATACAAATCTTAAGGA
A_30_P01028559	0.605766	1.52179	up		lincRNA:chr15:73231192-73231819 reverse strand	CCTTTGAAGTAGTAGTTTGTTTTTGGACAATGGAGAGTGTTACAAATTGAAGCAGAATAG
A_55_P1978226	0.605401	1.5214	up	Park2	Mus musculus Parkinson disease (autosomal recessive, juvenile) 2, parkin (Park2), mRNA [NM_016694]	GTCTGTGTGTGTGGTGGTACCCAGACTGTCAATCAATAAAGACCCAGACTGTCAATGAAA
A_55_P2352285	-0.605268	1.52126	down	AU014795	AU014795 Mouse two-cell stage embryo cDNA Mus musculus cDNA clone J0702G12 3'. [AU014795]	CCCAGGAAGGTGTTCCGATCATTAGGAGTTCCTGAAACTTTCAAGTCTACCTACATCTTC
A_52_P607683	0.605175	1.52116	up	Ppm1e	Mus musculus protein phosphatase 1E (PP2C domain containing) (Ppm1e), mRNA [NM_177167]	CGATTTACAAACCCACTCTACAGATCACTTTTGAGTTGAGTTGTAATCATAAGTGATCCT
A_55_P1964533	-0.604864	1.52084	down	Lrrc43	Mus musculus leucine rich repeat containing 43 (Lrrc43), mRNA [NM_001033461]	GAGGAAGCATTCCTTAGCTTGATTGACTAGCAGGGAGAATAAAGGCTGCTCTGCAGCCGG
A_55_P1976589	0.604807	1.52078	up	E130114P18Rik	Mus musculus RIKEN cDNA E130114P18 gene (E130114P18Rik), long non-coding RNA [NR_015513]	GTGTCTTGCAATATCAAATAAGCAGTTAAGATTTAGGTCCTTATGTGAACACTAACAAGC
A_55_P2094337	-0.604436	1.52038	down	Olfr986	Mus musculus olfactory receptor 986 (Olfr986), mRNA [NM_146615]	ATTAGAAACAAAGAGGTGAAGGGGGCCCTAAGAAAGGCCATTACTTGTGCAAACAGGCAT
A_30_P01021018	-0.603709	1.51962	down		lincRNA:chr12:106572079-106575298 reverse strand	GAGGTGGGTAATTGATTAGTTTGTCTGAGTCTCTGTCATAGTTTTTAGTATCATAGGAAA
A_55_P2007601	-0.603688	1.5196	down	Sftpd	Mus musculus surfactant associated protein D (Sftpd), mRNA [NM_009160]	AACAATGGTGGAGCAGAGAACTGTGTGGAGATCTTCACCAATGGGCAATGGAATGATAAG
A_30_P01020652	-0.603524	1.51942	down		lincRNA:chr14:77104770-77105392 forward strand	GCTGCCCACAGGATATATAGTACCACTGTAGTTATGGGCGGAAAAGTGGAAAAAATAGGA
A_55_P2130905	-0.603466	1.51936	down			GAAGCCTGGAACTCAGCTAAGCCTTCTGTCTCGCTCCTGCTCCTGCTCCTGCTCCTGCTC
A_30_P01030888	0.603397	1.51929	up		lincRNA:chr11:53592946-53637922 reverse strand	ATGCCACAATGTGCTTACATCAGAACTTCTAAAAGTGTAATGCCCTGGTCACTTCCGGGT
A_51_P413803	-0.603332	1.51922	down		RIKEN cDNA D530049N12 gene [Source:MGI Symbol;Acc:MGI:1925973] [ENSMUST00000133334]	CTGTCACCACAATGTTATGCTACGGCTGCCAGTTCTCTTATACTGGTTCTAGCCATATAC
A_55_P2096932	-0.6033	1.51919	down	Cntln	Mus musculus centlein, centrosomal protein (Cntln), transcript variant 2, mRNA [NM_177385]	CAGCAGCCGAATATAAGATTTTCCTTAAATAACAAGTTATCTATTCAGATCCACCAGTAG
A_55_P2041095	0.602645	1.5185	up	Six4	Mus musculus sine oculis-related homeobox 4 (Six4), mRNA [NM_011382]	CACACTGACCTTAACTCTCTGTATGTACCCTTGTTATTCTGCATGTTAAAGCTGGAATTC
A_30_P01031865	-0.602628	1.51848	down		lincRNA:chr7:49715933-49771497 forward strand	ATCTGTGGCAGTATTCAGAAATACCCAACCAATGATGGCTTTCACGTCCTACTGGATTCT
A_55_P2051525	-0.602442	1.51828	down			AGAAGTCTTCATTGTGAGTCTAGACACAAACTTACCCAAAGGAGCTCTCAGTACCAGCAG
A_55_P2299116	0.60239	1.51823	up	LOC553090	Mus musculus 16 days embryo head cDNA, RIKEN full-length enriched library, clone:C130088L03 product:unclassifiable, full insert sequence. [AK081940]	GGCTGCAGCTGGATAGTTGTGTGGTACTTGTTAGTTTTGTCTTATTTTATAATTGTATAC
A_55_P2130007	-0.602271	1.5181	down	Esp6	Mus musculus exocrine gland secreted peptide 6 (Esp6), mRNA [NM_001177529]	ACAAATGTGGTGCTCAGAAATATAAAGTGGCTGAATACGTACCAGAGGATGGCCTTGCTG
A_55_P2213348	0.602109	1.51793	up	5330421C15Rik	Mus musculus adult male hypothalamus cDNA, RIKEN full-length enriched library, clone:A230104L24 product:unclassifiable, full insert sequence. [AK039175]	ATGACTTTGGTACTTAATATGCTATGCCATCCGTCTTCTTTGAAAACAATGAAAGGAACC
A_52_P572197	-0.601928	1.51774	down	Pank3	Mus musculus pantothenate kinase 3 (Pank3), mRNA [NM_145962]	GTCCTTAGACTGTTCAAATGGAATATGGTTAGAGTGAGTGACATTCTATGCTCTTTCTCT
A_55_P1964183	0.601841	1.51765	up	Dysf	Mus musculus dysferlin (Dysf), transcript variant 2, mRNA [NM_001077694]	AACACTCCTCTGGATAAACTCTTGGCTTTCTCAGTATAAAGCAGACAGAACCAGAAAATA
A_55_P2193809	0.601244	1.51702	up	9530062K07Rik	Mus musculus adult male urinary bladder cDNA, RIKEN full-length enriched library, clone:9530062K07 product:unclassifiable, full insert sequence. [AK020619]	TGGTTGGTTGTTTCATTTTTCTAGGTAGGGTTTCTTTGTGTAGTTCCGGCTGTTTTGGTA
A_30_P01026994	0.600212	1.51594	up		lincRNA:chr1:63264155-63345773 forward strand	TCAGATGGTGCTCTCTCCATTCAGATGGTGCTCTCTCTATTTAAAATGGAATGTTTTTAT
A_55_P1976949	-0.59982	1.51553	down	Tmprss9	Mus musculus mRNA for Serase-1B, complete cds. [AB109391]	ATCCACATCTGTCTCATTGGCTCCTGAGGGAGTCAGCAAGCACTCTATTGACTATTAATG
A_55_P2113486	0.599734	1.51544	up	Nupr1l	Mus musculus nuclear protein transcriptional regulator 1 like (Nupr1l), mRNA [NM_026916]	TTCGAAGAGGAGGTGTACGACTGCCTGGATTACTACTACCTGCGTGACTTCCCGGCCTCT
A_30_P01020015	-0.599668	1.51537	down		lincRNA:chr17:39982023-39983277 forward strand	CCGCCGCCGCCTCCTCCTCTCTCGCGCTCTCTGTCCCGCCTGGTCCTGTCCCACCCCCGA
A_30_P01031038	-0.599368	1.51505	down		lincRNA:chr14:77511189-77522852 forward strand	CAACAACTGGAAAAAACTGCAGCTGAGTTAAAAAAGCGGATCAGAGAGAAGGAAGCCAGT
A_55_P2101930	-0.599306	1.51499	down	Gprin2	Mus musculus 0 day neonate cerebellum cDNA, RIKEN full-length enriched library, clone:C230073P13 product:hypothetical protein, full insert sequence. [AK048836]	TAAAAGGCCAAGTTTGCAAAACAGCTTCTGGGCAGATCCTTAGACAGGTAGATCTCACTG
A_55_P2112967	-0.599278	1.51496	down	Diap1	Mus musculus diaphanous homolog 1 (Drosophila) (Diap1), mRNA [NM_007858]	AGGTGAAGGAGGACCGCTTTGAGAACAATGAACTTTTTGCCAAACTTACCCTTGCCTTCT
A_55_P2100555	-0.599017	1.51468	down	L1cam	Mus musculus L1 cell adhesion molecule (L1cam), mRNA [NM_008478]	GGAGGCAATGACAGTTCAGGGGCTACCTCTCCTATCAATCCTGCAGTAGCCCTAGAATAG
A_30_P01027946	0.59834	1.51397	up		lincRNA:chr17:84350367-84351803 reverse strand	TTCAGTGCCTGTCTGGTCCAAGTCAAGGTCTTGTTTCTTCCCATGGTGGGAGCTCCAGAG
A_55_P2062171	-0.59823	1.51386	down	Odf3	outer dense fiber of sperm tails 3 [Source:MGI Symbol;Acc:MGI:1916537] [ENSMUST00000135845]	ATCTCTTGTTTGTTAATCTGGTTTCTTGCCATGTCCAAATTATTAAATAAACCACAGATT
A_55_P2148403	-0.597827	1.51343	down			TTTTCATGAGTCAGATGACTTACTGAAGTTTTGGGATCAAGGTGCCTCCTTGCCATCCCA
A_30_P01022852	-0.59763	1.51323	down		lincRNA:chr15:90074814-90087814 forward strand	AATCAGACCCAGCTACTTATGCTTATTGCAAATAACTGTGTCTCCAACACTACAAACTGC
A_51_P388268	-0.597343	1.51293	down	Olfr402	Mus musculus olfactory receptor 402 (Olfr402), mRNA [NM_146708]	ATGCAGACAAAGCCTAGAATCAATGGAACCACTATTACTGAATTCATTCTTCTGGGTTTG
A_30_P01033211	-0.597325	1.51291	down		lincRNA:chr13:70745306-70837331 forward strand	TTAAACAAAGCACCGGCACCCGCCCCCAAAACGGCGCAAAAGGGTCAGCCAGGGATCCTG
A_55_P2017086	-0.596296	1.51183	down	Ezh1	Mus musculus enhancer of zeste homolog 1 (Drosophila) (Ezh1), mRNA [NM_007970]	GCATTGGGATCTTTGCCAAGAGAGCAATTCAGGCTGGCGAAGAGCTCTTCTTTGATTATA
A_55_P2018457	0.596205	1.51173	up	Hdac7	Mus musculus histone deacetylase 7 (Hdac7), transcript variant 2, mRNA [NM_001204276]	CCAAGAAAGAGTATTTGTGTGTATGTGTGTGTATGAGTGCGTGCAAGAGGGTATATGTGT
A_30_P01026339	0.595843	1.51136	up		lincRNA:chr17:6830756-6832322 reverse strand	GTTTTTACGTTTCTCTGTATGTATGTGTGAACTGTATGTATGTGCATTTCTGCATGCTTT
A_30_P01030458	0.595191	1.51067	up		lincRNA:chr15:73231192-73231819 reverse strand	ATGGCAGGATTATCTACTGTCCTAGTTTCATTTTTGTTGCTTTGATAAAAATACCACACC
A_51_P151371	-0.595023	1.5105	down	Zfp444	Mus musculus zinc finger protein 444 (Zfp444), transcript variant 2, mRNA [NM_028316]	GGATGTGACCGAAGCCCGGGGGTCAGTGTTGGAAAGGAAGAAAGTGGGGCAATTCCCTTA
A_55_P2060931	-0.594803	1.51027	down	Gm5627	Mus musculus predicted gene 5627 (Gm5627), long non-coding RNA [NR_033301]	AGGATACCTGTAAACACCGAAGCATGTTTCAAAGAAAAACAAAAGTCAAATTACAGAGCT
A_55_P2134032	-0.594546	1.51	down			ACTTAAGCTTTCTTTTCCGAGTAACCGCCAAGATTGCTGAAGTGGAGCAGAAGAAGAAGC
A_51_P378341	-0.594469	1.50992	down		RIKEN cDNA 4933411O13 gene [Source:MGI Symbol;Acc:MGI:1918385] [ENSMUST00000050665]	GGTTTTTGATTTAATGAATTTTAGTCTGAATTTTAAGTACTAGTTATTGATTTAATTTAG
A_66_P139971	0.593426	1.50883	up	Gm7894	Mus musculus adult male testis cDNA, RIKEN full-length enriched library, clone:1700064F11 product:unclassifiable, full insert sequence. [AK131747]	GATCTTCTTCAATAGTCAAATGGGGTTTGGCCACTAGATCCTCCCCAGTGTCCGCAGAGG
A_52_P657123	-0.592922	1.5083	down	LOC101056031	PREDICTED: Mus musculus non-histone chromosomal protein HMG-17-like (LOC101056031), mRNA [XM_003945586]	TGGTAAGGATGCAAATAATCCTGCAGAAAATAGAGATGCCAAAACAGACCAGACACAGAA
A_30_P01023896	-0.59282	1.50819	down		lincRNA:chr5:34696192-34722842 forward strand	CTCTCGCCAGCAGCTGCCCCTCAGATCCCGTCCGCCCCGCCCTCCCAGCCCGGGAGGAGA
A_55_P2031333	-0.592788	1.50816	down	Uxs1	Mus musculus UDP-glucuronate decarboxylase 1 (Uxs1), mRNA [NM_026430]	ACTGAAGACTAATACAATTGGAACACTAAACATGTTGGGATTGGCAAAGCGCGTGGGTGC
A_51_P498882	-0.592569	1.50793	down	Cyp2c37	Mus musculus cytochrome P450, family 2. subfamily c, polypeptide 37 (Cyp2c37), mRNA [NM_010001]	CACACTGGACACACTGACTTTTATCCAGTTCTTTTGCCTCCTCGTAATTTCATAAGGTTC
A_30_P01026030	-0.592199	1.50754	down		lincRNA:chr4:131736628-131737384 forward strand	TTTTCTTTACAATGATGAAATCATAACGGGGTGAGGATGGAGCAGAACACCGGGAGAGGT
A_51_P215038	0.592094	1.50743	up	Tmem59l	Mus musculus transmembrane protein 59-like (Tmem59l), mRNA [NM_182991]	CCCTCTGCTAAGGTTCCTTCCCTTTGTCTCTGGAAACCCAACCCCACAAGGACAGAGTGG
A_52_P352362	0.591691	1.50701	up	Gm7265	PREDICTED: Mus musculus predicted gene 7265 (Gm7265), misc_RNA [XR_105293]	CCTGGAATTCTTAGCTATACTGATTATACTTGATTATAGCACTATCTGTTCCTTTCTGTG
[truncated: 19 more rows]
